# Supplementary material for: Comprehensive Analysis of Hub Genes Associated With Competing Endogenous RNA Networks in Stroke Using Bioinformatics Analysis
Source: Frontiers journal article supplement (doi:10.3389/fgene.2021.779923), 2022-01-12

A

## Sample dendrogram and trait heatmap

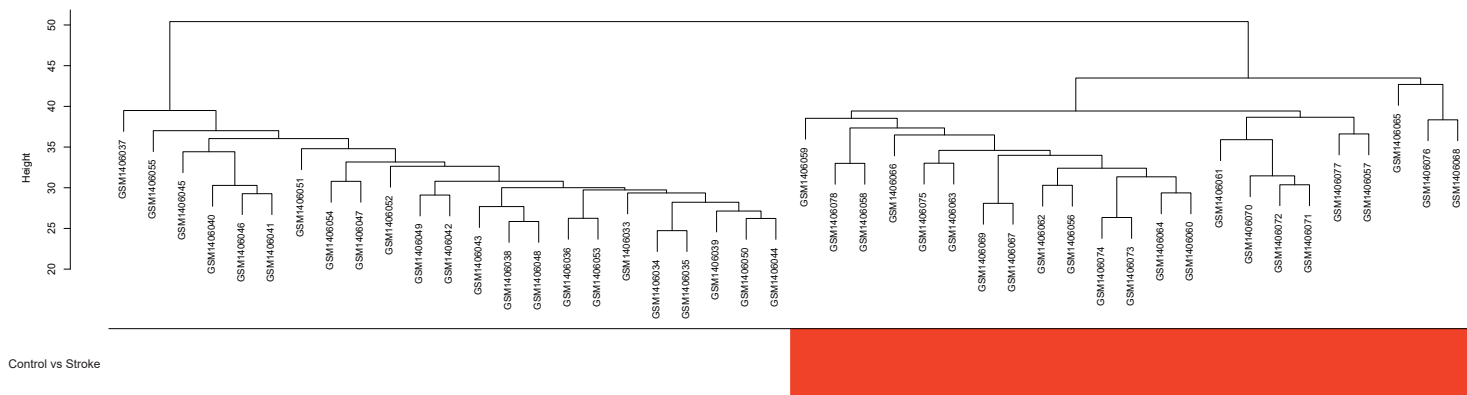

B

## Scale independence

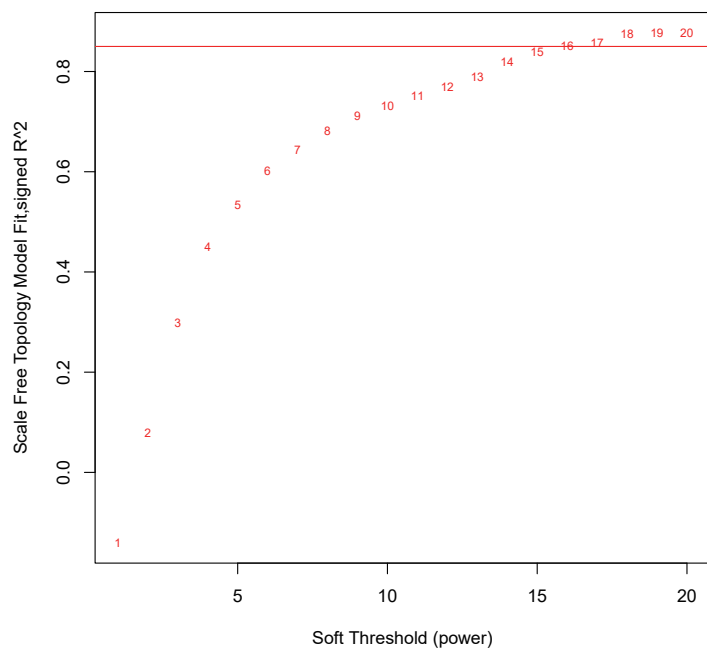

## Mean connectivity

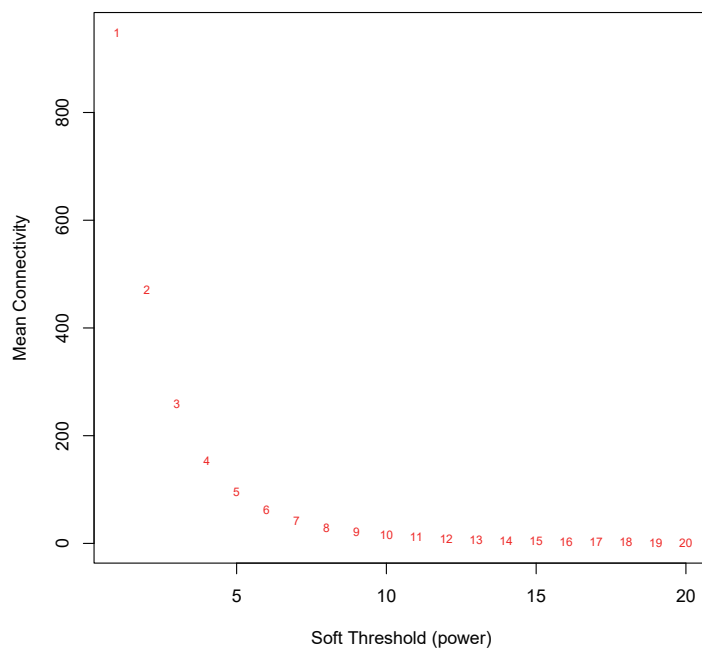

C

## Cluster Dendrogram

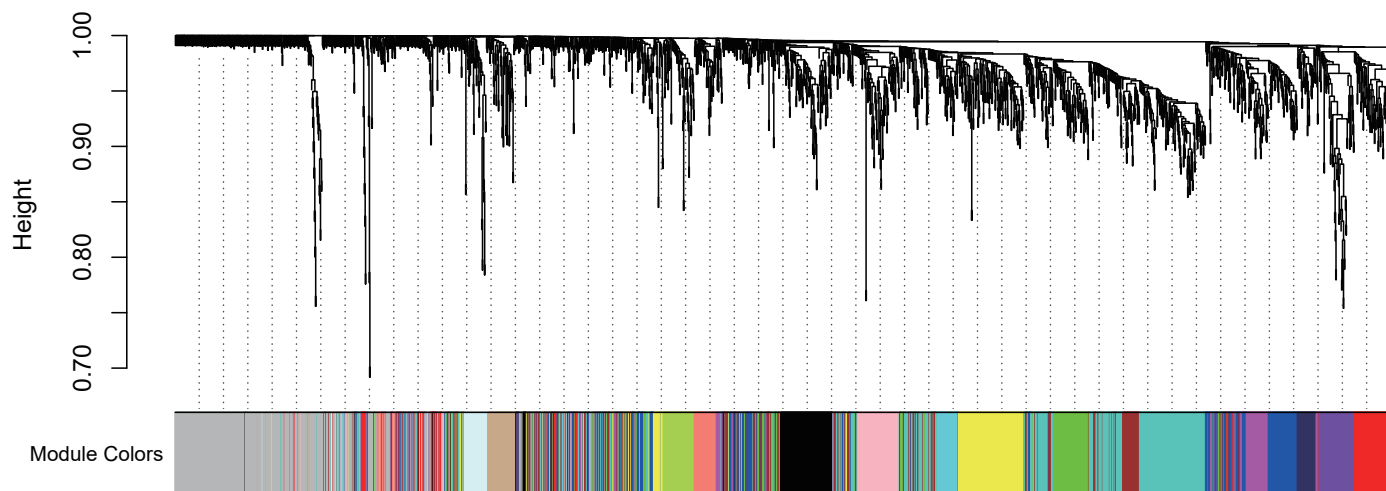

Supplement: Data_Sheet_1.ZIP [file Data_Sheet_1.ZIP]
