# Supplementary material for: Comprehensive Analysis of Hub Genes Associated With Competing Endogenous RNA Networks in Stroke Using Bioinformatics Analysis
Source: Frontiers journal article supplement (doi:10.3389/fgene.2021.779923), 2022-01-12
Supplement: Data_Sheet_6.ZIP [file Data_Sheet_6.ZIP]

SYMBOL	ENTREZID
ACSM2A	123876
TIMM8A	1678
SH3GL3	6457
SRCIN1	80725
CCDC127	133957
GLTP	51228
TM9SF2	9375
PRTG	283659
MIB1	57534
ENO1	2023
SHOX	6473
GYG1	2992
SPTLC3	55304
NOA1	84273
TTC1	7265
DHX32	55760
FAM133A	286499
WDR1	9948
TRAF7	84231
CXADR	1525
SMIM12	113444
RPN2	6185
AKIRIN2	55122
RAB11A	8766
ADIPOR2	79602
ATP5H	NA
SPG21	51324
OVOL2	58495
DCTN4	51164
HINT2	84681
USP37	57695
TOR1AIP2	163590
SH3GLB1	51100
SYCP1	6847
ERLIN1	10613
SDF2	6388
ABHD17A	81926
MAP3K1	4214
FBXO30	84085
SUSD1	64420
TCIRG1	10312
MTX1	4580
BRAP	8315
THSD4	79875
HNRNPL	3191
UBE2S	27338
AGFG1	3267
DCXR	51181
CTDNEP1	23399
ANXA7	310
MCTS1	28985
ELF4	2000
GLYATL1	92292
ZNF536	9745
KPNA2	3838
UBE2A	7319
GAB1	2549
PMF1	11243
CARS	NA
C5orf51	285636
NAA60	79903
COX19	90639
FAM102A	399665
LATS2	26524
SLCO3A1	28232
USP3	9960
SLC22A4	6583
EMC8	10328
PDK3	5165
MAPK13	5603
NIPA2	81614
SHKBP1	92799
FAT3	120114
MSL3	10943
ENTPD1	953
ATF6	22926
CD79B	974
MANBAL	63905
RASEF	158158
PSMB5	5693
ETF1	2107
RRAGA	10670
DPF2	5977
JAGN1	84522
MIER2	54531
HCCS	3052
STRADA	92335
PSMD2	5708
GRK6	2870
ATP5B	NA
CTSK	1513
PPFIA1	8500
RPN1	6184
PARL	55486
NDUFS6	4726
VDAC3	7419
SPTLC2	9517
OTULIN	90268
GNPDA1	10007
FAM49B	51571
CHPF2	54480
PRRG4	79056
SPIB	6689
ZNRD1	30834
TSPAN14	81619
DNAJC15	29103
BRAF	673
CPD	1362
POLE4	56655
KLHL18	23276
LECT2	3950
QSOX1	5768
NUP214	8021
XRCC2	7516
DNASE1L1	1774
HNRNPLL	92906
DUSP22	56940
VPS9D1	9605
PLXDC2	84898
JAK1	3716
NSDHL	50814
SF3A1	10291
SF3A2	8175
EME1	146956
FXYD1	5348
PTTG1	9232
BMP2K	55589
ATP6V1D	51382
SAP30	8819
DR1	1810
TNK2	10188
TMEM33	55161
SLK	9748
LHFPL2	10184
GLI4	2738
FAM120AOS	158293
GIT2	9815
MPC2	25874
COPG1	22820
NDUFA9	4704
ASB7	140460
PGP	283871
CUL4B	8450
TAF10	6881
GOLGB1	2804
MORF4L2	9643
ATXN1	6310
VPS35	55737
CES2	8824
PFDN1	5201
TXN	7295
KRTCAP2	200185
MCEMP1	199675
ZFYVE26	23503
PIK3R5	23533
UBAP2	55833
CCDC71L	168455
VCPIP1	80124
FAM98C	147965
FUCA2	2519
MESDC1	NA
F12	2161
ALDH3A2	224
FXYD5	53827
GAGE1	2543
PPP5D1	100506012
DHDDS	79947
LILRA5	353514
B3GALT4	8705
SMARCD3	6604
CRIPT	9419
PHF20L1	51105
PSEN1	5663
PIK3C3	5289
TNFRSF25	8718
PRCP	5547
ID3	3399
FIBP	9158
CWF19L2	143884
TRIM27	5987
CRTAP	10491
NMT1	4836
GTF2IRD2	84163
SAFB2	9667
SSR4	6748
GATS	NA
XPR1	9213
RAB7A	7879
ST6GALNAC3	256435
MAP2K6	5608
GLA	2717
ATP5L	NA
SLC46A3	283537
P4HA1	5033
DHX40	79665
KDM3B	51780
RNF7	9616
TST	7263
GMPS	8833
SLC12A6	9990
ARPP19	10776
CASP1	834
ADCY4	196883
KAT7	11143
PTTG1IP	754
TANC2	26115
HARBI1	283254
HEBP2	23593
IDH1	3417
LCN10	414332
PAPOLA	10914
NDUFB11	54539
RBMS3	27303
RGL2	5863
IMPAD1	54928
JTB	10899
HECW2	57520
STX8	9482
PDXK	8566
NPL	80896
IFI27L2	83982
VIPAS39	63894
ATXN2L	11273
CHRNA10	57053
UBE2G2	7327
YIPF1	54432
APMAP	57136
UBE2K	3093
PINX1	54984
ANXA1	301
COX16	51241
PARP10	84875
FCRL4	83417
UVSSA	57654
KIAA1958	158405
DUSP1	1843
CDK19	23097
SNTB2	6645
FEZ2	9637
EAPP	55837
GTF3C2	2976
PDZD11	51248
EIF4E3	317649
RNF31	55072
SVIL	6840
CEBPD	1052
AP3M1	26985
ACIN1	22985
SNIP1	79753
SLC16A1	6566
ARAP3	64411
FAM175B	NA
ALPK1	80216
GPD2	2820
SGPL1	8879
ZNF428	126299
DHX38	9785
BAHD1	22893
RPS19BP1	91582
HOOK3	84376
CD163	9332
GLUD1	2746
SOAT1	6646
SUMO3	6612
ZNF668	79759
C1orf162	128346
TRAPPC5	126003
FAM172A	83989
IL18RAP	8807
ELMO1	9844
POTEM	641455
ATPAF1	64756
LSM12	124801
TCOF1	6949
RNF8	9025
NUBP1	4682
ANKRD22	118932
LAMP2	3920
PIGC	5279
SNX6	58533
MED31	51003
ACSS2	55902
TLR5	7100
SENP1	29843
UBL5	59286
PGLS	25796
DPM3	54344
PNKP	11284
DAD1	1603
NDUFA3	4696
NSMAF	8439
LSM2	57819
CALCOCO2	10241
SFXN5	94097
DERA	51071
CPQ	10404
MGST2	4258
GABRB2	2561
SUV420H1	NA
RFWD2	NA
POP4	10775
DTD1	92675
FAM102B	284611
STK4	6789
PPP5C	5536
ZNF467	168544
SUOX	6821
CASKIN1	57524
COX7A2	1347
STT3A	3703
ERGIC1	57222
FAM189B	10712
SERTAD3	29946
GPAA1	8733
ACSL3	2181
VSIG4	11326
HSPBAP1	79663
TMEM50A	23585
SLC2A3	6515
KATNB1	10300
CASP9	842
LPAR4	2846
USP35	57558
F5	2153
DIRC2	NA
AVEN	57099
ATN1	1822
ATG7	10533
CARD6	84674
UBE2J2	118424
CREBRF	153222
GPCPD1	56261
VPS41	27072
NPC1	4864
CCDC64	NA
RRS1	23212
COX15	1355
UBALD2	283991
TOM1	10043
UBALD1	124402
TERF2IP	54386
PSMD12	5718
SPIDR	23514
MCTP2	55784
TMC6	11322
ZC3H3	23144
SHC4	399694
PDSS1	23590
RAB40C	57799
TSG101	7251
KIAA2013	90231
ZFYVE1	53349
MAPRE2	10982
IFT52	51098
LYSMD1	388695
LRRC59	55379
TAF3	83860
ME2	4200
SAP30L	79685
SET	6418
NAGA	4668
RRP36	88745
RPRD1B	58490
CNIH4	29097
CACNA1E	777
SCRG1	11341
RARS2	57038
MFSD5	84975
VPS33B	26276
HAS3	3038
CLEC5A	23601
ZNF552	79818
ADSL	158
TOR1B	27348
SLIRP	81892
GUSB	2990
CITED4	163732
SIRPD	128646
FAF1	11124
FAR2	55711
ABHD5	51099
GDI1	2664
SNX11	29916
TSHZ3	57616
GPR97	NA
ITFG2	55846
PAK3	5063
STAM2	10254
ZNF586	54807
MRPL43	84545
RBM22	55696
RITA1	84934
CACUL1	143384
VPS13A	23230
RGS19	10287
SPRED2	200734
C9orf69	NA
SLC38A10	124565
BOD1L1	259282
RNF169	254225
MYEOV2	NA
TRAF6	7189
MON1A	84315
MSRB2	22921
MMADHC	27249
SYTL3	94120
KBTBD7	84078
ALOX5	240
LSM10	84967
PSMC3	5702
ITGAM	3684
ARMC12	221481
SCARB2	950
SNX22	79856
CANT1	124583
IPCEF1	26034
MICU1	10367
FAM89B	23625
GGNBP2	79893
CDCA5	113130
CMTM7	112616
ALYREF	10189
SETX	23064
LINC00493	NA
TMEM260	54916
PIGS	94005
ANKRD36B	57730
TM9SF1	10548
MSRA	4482
FAM160A2	84067
TMED8	283578
LPCAT2	54947
COPRS	55352
TMEM258	746
TCHP	84260
SSH2	85464
DOHH	83475
WSB1	26118
ADAMTSL4	54507
ERO1L	NA
KLF2	10365
MT2A	4502
WDR46	9277
USMG5	NA
RNPC3	55599
PFKFB4	5210
ILK	3611
SCCPDH	51097
PTPLAD2	NA
C11orf73	NA
NENF	29937
C7orf73	NA
PA2G4	5036
NCAPH2	29781
GAK	2580
PUS10	150962
FGF20	26281
ZNF580	51157
CARD8	22900
ADA	100
CLEC4D	338339
RAP2A	5911
ARG1	383
C19orf24	NA
C10orf12	NA
FAM155A	728215
NDUFA1	4694
BAZ2B	29994
PIDD1	55367
RPS6KC1	26750
NDST3	9348
CWF19L1	55280
LRRC28	123355
HTATIP2	10553
NDUFC1	4717
KIF1B	23095
VNN3	55350
PHKA2	5256
GORASP2	26003
EIF2AK2	5610
GADL1	339896
ACSM5	54988
TBCC	6903
C12orf75	387882
CARD16	114769
MGST3	4259
MRPS14	63931
TFE3	7030
ANKRD50	57182
MICAL3	57553
TMEM201	199953
ANTXR2	118429
RTN2	6253
DAGLB	221955
GNAI3	2773
MPPED2	744
NR3C1	2908
RAP1GDS1	5910
SEC61G	23480
TBC1D13	54662
GGA1	26088
CTBS	1486
INO80C	125476
SLC17A5	26503
REEP4	80346
NEURL1	9148
MED8	112950
ALG6	29929
APBB1IP	54518
RNF38	152006
CYB561D2	11068
SFN	2810
RPUSD3	285367
INTS6	26512
SIPA1L1	26037
PKM	5315
DOK3	79930
HPSE	10855
TRIM69	140691
RNF166	115992
PPM1M	132160
TSEN34	79042
DIAPH2	1730
FAM160B1	57700
PML	5371
SRPK1	6732
LRRC25	126364
FAM63B	NA
LYRM1	57149
TFG	10342
CTRL	1506
RNF146	81847
TMEM120A	83862
CKLF	51192
UBE2F	140739
PLIN3	10226
SPHK2	56848
OLAH	55301
VAPA	9218
GDE1	51573
NFAT5	10725
USP25	29761
C14orf2	NA
MEF2A	4205
CSTA	1475
KLHL9	55958
RBX1	9978
YDJC	150223
CXCL16	58191
RAE1	8480
RNF175	285533
IFNAR1	3454
CLCN5	1184
ASCC1	51008
GABPB1	2553
PRMT1	3276
PFKFB3	5209
CCDC6	8030
GOLPH3L	55204
UBE2G1	7326
PRPF40A	55660
SOX7	83595
DPP8	54878
EZH1	2145
ATP1B3	483
NFIL3	4783
PTPN23	25930
NDUFAF3	25915
MKL1	NA
OST4	100128731
ABCD1	215
TBC1D7	51256
OSBPL1A	114876
RLF	6018
CLIC3	9022
PGM1	5236
SREK1IP1	285672
SSH3	54961
DECR2	26063
UBE2E3	10477
PAFAH1B2	5049
RPL26L1	51121
C18orf8	NA
NSD1	64324
ANXA5	308
WDFY3	23001
FXYD6	53826
VAMP7	6845
KCNJ2	3759
MEF2C	4208
NUP205	23165
MSX1	4487
AREL1	9870
TAX1BP1	8887
TMX4	56255
ARL6IP4	51329
ZNF566	84924
PLRG1	5356
NFKBID	84807
NLRP12	91662
GFPT1	2673
SIRPB1	10326
AMN1	196394
HDLBP	3069
S100A12	6283
S1PR3	1903
RHOG	391
MX2	4600
FAM32A	26017
SHC1	6464
RNASE6	6039
PPP3R1	5534
CLEC1A	51267
STX6	10228
PIK3CG	5294
SCYL2	55681
SIX3	6496
C1QC	714
PTK2B	2185
LILRA1	11024
TLR8	51311
INSC	387755
LTB	4050
OAZ3	51686
FDX1L	NA
CCR6	1235
EFTUD2	9343
ZNF521	25925
SMDT1	91689
SLA	6503
APOO	79135
GRAMD4	23151
KDM5B	10765
EIF4E2	9470
ADAM8	101
SLX4IP	128710
MLLT1	4298
UQCRQ	27089
ELP5	23587
SLC26A8	116369
PELO	53918
TTC13	79573
RNF165	494470
SOX9	6662
NASP	4678
NBN	4683
RHOT1	55288
GALK1	2584
ZNF438	220929
MIB2	142678
KCNE1	3753
PLD4	122618
TAOK2	9344
SLC26A6	65010
ACKR4	51554
NUDT22	84304
NPEPPS	9520
OGFOD3	79701
HDHD1	NA
MAP3K15	389840
SMPD1	6609
PHF12	57649
PEX2	5828
HSDL2	84263
MGST1	4257
KLF7	8609
POLD1	5424
GMPR2	51292
SRGAP2C	653464
NOTCH1	4851
AKNAD1	254268
LTB4R	1241
CYBB	1536
DAPP1	27071
MKNK1	8569
STEAP4	79689
DMPK	1760
COX7B	1349
TAF15	8148
TPST2	8459
C8orf88	100127983
EIF2B2	8892
AK2	204
SLC38A7	55238
SERPINB8	5271
BMX	660
HIST1H4H	NA
VPS37C	55048
IL1R1	3554
METTL25	84190
COG4	25839
C19orf54	284325
TUBA4A	7277
PKN1	5585
BRI3	25798
PRKDC	5591
TMEM216	51259
ARID5A	10865
BIRC2	329
GNB4	59345
PPP2R5A	5525
SLC35D1	23169
CCRN4L	NA
SELT	NA
CD82	3732
PPP1R12C	54776
CYSTM1	84418
CERS4	79603
ZNF175	7728
CD7	924
SERAC1	84947
RELT	84957
SPG11	80208
GLIS3	169792
ITGA1	3672
FES	2242
AP1G1	164
THOC5	8563
STX11	8676
DCUN1D1	54165
NACC2	138151
FBXL5	26234
ACTR3C	653857
POLB	5423
SBNO2	22904
CR1	1378
DHCR7	1717
TRIP4	9325
TCN2	6948
ASPH	444
PPCDC	60490
SOX11	6664
CDIPT	10423
SETD7	80854
SIGLEC7	27036
C1orf122	127687
IL1RAPL1	11141
NDUFB3	4709
C4orf3	401152
ATP6V0B	533
ARL15	54622
PSME3	10197
CBX4	8535
TBC1D10A	83874
ELP4	26610
ZFP28	140612
BCL2A1	597
RTFDC1	NA
PRELID1	27166
DRAP1	10589
SQRDL	NA
C1orf86	NA
AP3S1	1176
SLC31A1	1317
CIDEB	27141
MAP3K5	4217
CASP5	838
ETV6	2120
MCMBP	79892
POLR3B	55703
AP3D1	8943
EPC2	26122
LYST	1130
GIPC1	10755
INTS3	65123
ZNF414	84330
MMP19	4327
SPRYD7	57213
JMJD6	23210
RPL22L1	200916
WIBG	NA
GTPBP1	9567
CEP164	22897
POLR2I	5438
TBL1X	6907
AKR7A3	22977
PLIN2	123
ARL3	403
CLOCK	9575
RBMS2	5939
THRAP3	9967
LAMTOR5	10542
KIAA0319L	79932
PPP4R1	9989
VPS51	738
FARSB	10056
SLC36A4	120103
ZNF257	113835
DYNLT1	6993
GPER1	2852
MPZL3	196264
LY6G5C	80741
IRS2	8660
MARK3	4140
DPH3	285381
CMC2	56942
BROX	148362
FGGY	55277
ABCA1	19
CD19	930
FNDC3A	22862
MRPS18C	51023
PRR3	80742
SLC25A42	284439
SURF1	6834
DPY19L3	147991
ATRX	546
VCAN	1462
MVB12B	89853
C11orf57	NA
ZNF615	284370
C5orf45	NA
GAS7	8522
SUMF1	285362
LRCH3	84859
MTMR3	8897
CHIC2	26511
TFAP4	7023
LRG1	116844
FBN2	2201
VARS2	57176
ARRDC4	91947
RNF135	84282
TLR2	7097
AMPD2	271
TMUB2	79089
CCDC43	124808
NRD1	NA
TMEM208	29100
VPS53	55275
GALNT14	79623
DNAJA2	10294
RABEP1	9135
CD93	22918
C3orf38	285237
SNAPIN	23557
PIAS3	10401
TBC1D22A	25771
NUP153	9972
NIPBL	25836
DMRT2	10655
PCNX	NA
SEMA4B	10509
SLC45A4	57210
LIN7A	8825
CHAMP1	283489
MUL1	79594
FKBP9	11328
CENPN	55839
ARSG	22901
ZNF287	57336
RALBP1	10928
CYFIP1	23191
APBA2	321
LUC7L3	51747
PLIN5	440503
TPM2	7169
BCAT1	586
BHLHB9	80823
LXN	56925
CLPB	81570
PPP1R3B	79660
FAM199X	139231
SLC35F1	222553
FMO2	2327
HGH1	51236
ADRBK2	NA
ARHGAP26	23092
CTBP2	1488
PBX3	5090
SH2B3	10019
PNPLA3	80339
LRTOMT	220074
SYNGR1	9145
PGM2	55276
ZBTB33	10009
CXXC5	51523
TGFA	7039
CNPY3	10695
ACVR1B	91
GABRA4	2557
CAMKK1	84254
ADRBK1	NA
ADH4	127
GOLPH3	64083
SCO2	9997
ARF3	377
LY96	23643
LIX1	167410
MS4A6A	64231
WWC2	80014
FBXO34	55030
MMP9	4318
ALKBH6	84964
PMP2	5375
SLAMF8	56833
MTFMT	123263
CFD	1675
TTC28	23331
GPR132	29933
PITPNA	5306
SLC29A4	222962
SCPEP1	59342
CMTM4	146223
SORT1	6272
SPTB	6710
CCR1	1230
TMUB1	83590
ZNF483	158399
PLD3	23646
ANKRD37	353322
CARKD	NA
CSNK1G1	53944
FCGRT	2217
KIF3C	3797
TMEM138	51524
C2orf76	130355
LILRB1	10859
ZNF592	9640
ST3GAL1	6482
TMEM38A	79041
IL1R2	7850
MYO1C	4641
COMMD3	23412
ALKBH2	121642
DPH2	1802
TGFBR3	7049
CST8	10047
TJP1	7082
F8	2157
WWP2	11060
IQSEC2	23096
ALX3	257
KLHDC3	116138
FLVCR2	55640
FAM111B	374393
PIKFYVE	200576
GSK3B	2932
ANKRD6	22881
NDUFA4	4697
MRPL41	64975
PELI2	57161
ARL5B	221079
MEX3C	51320
AKAP11	11215
MEA1	4201
DDX39A	10212
LRFN5	145581
OSM	5008
PAK2	5062
TNKS	8658
NDUFA6	4700
GABARAPL2	11345
ARHGAP4	393
PAX5	5079
FAM173B	NA
CXCR5	643
ZNF776	284309
ACPP	55
CWC25	54883
RBMXL1	494115
FAM178A	NA
TSTD1	100131187
HIST1H4D	NA
CCNB2	9133
CHMP2A	27243
CAMKMT	79823
TAB3	257397
MT1G	4495
SLC12A9	56996
ADCK1	57143
ATG3	64422
GRHL2	79977
CHCHD1	118487
IRAK3	11213
DTNBP1	84062
TRIM21	6737
AOAH	313
CTNS	1497
PIEZO1	9780
N4BP1	9683
ATP6V1C1	528
MAP1S	55201
ECHDC3	79746
MS4A4A	51338
CCDC142	84865
MAN2A1	4124
RIN3	79890
PFN4	375189
ZNF385D	79750
G0S2	50486
FCHO2	115548
CYP2R1	120227
PCTP	58488
C14orf159	NA
TMEM39A	55254
COL5A3	50509
BTBD19	149478
CALHM2	51063
FAM114A2	10827
MYL6B	140465
C2orf80	389073
ACOX2	8309
RGL3	57139
LDLR	3949
FCAR	2204
ZNF35	7584
CD72	971
PTMA	5757
CHMP7	91782
BTBD7	55727
NOL7	51406
BCL7A	605
PLSCR1	5359
KCNH7	90134
IDI1	3422
FAM43A	131583
CECR6	NA
ACP6	51205
KLHL13	90293
CDADC1	81602
EMR3	NA
SSH1	54434
ARFIP1	27236
SLC22A1	6580
TAS2R38	5726
SLC7A1	6541
BRCA1	672
GAB2	9846
ACAT1	38
PKLR	5313
DHRS12	79758
CLDN9	9080
IMPDH1	3614
ABCB4	5244
C10orf128	NA
HINT1	3094
ZC3H15	55854
RPS21	6227
CXCR1	3577
NME8	51314
GGH	8836
DEFB108B	245911
KIAA0513	9764
TRAPPC6A	79090
RNF24	11237
TNFAIP6	7130
PTRH2	51651
IGF2R	3482
EPB41L3	23136
INSL3	3640
RAB36	9609
TBX3	6926
MTF1	4520
NPEPL1	79716
GLOD5	392465
MAGI1	9223
ZNF641	121274
ANG	283
MRPL3	11222
EMR2	NA
DTX1	1840
GANC	2595
ALKBH7	84266
CEACAM1	634
ANXA3	306
APC	324
CASC1	55259
PAPSS1	9061
WDR72	256764
TBC1D1	23216
SLC18A2	6571
TNNC2	7125
CDH26	60437
VASP	7408
PSENEN	55851
GFM2	84340
PDE1C	5137
DYSF	8291
PQLC1	NA
DDIT3	1649
NOS3	4846
TSPAN2	10100
MLC1	23209
CCDC157	550631
SLC39A4	55630
LDLRAD3	143458
EXOC6	54536
NR1D2	9975
TSC22D2	9819
PPP1R18	170954
MRAP	56246
ENAM	10117
TMEM45B	120224
FAM110B	90362
PIAS2	9063
EXOC8	149371
CCDC150	284992
UQCRC1	7384
PTP4A3	11156
IMMP1L	196294
MOSPD2	158747
GPR160	26996
FNIP2	57600
CCDC17	149483
DRAM1	55332
SPRY3	10251
PPP1R3C	5507
ZMAT2	153527
ING5	84289
HLX	3142
HESX1	8820
AGTRAP	57085
DCTN6	10671
TOR2A	27433
ESRP1	54845
TM6SF1	53346
GOLGA6L2	283685
DUSP10	11221
ORC2	4999
HGD	3081
CAMTA2	23125
CCSAP	126731
KCTD21	283219
ATF5	22809
RRM2B	50484
OSTC	58505
TFEC	22797
CDC45	8318
PHTF1	10745
AGPAT9	NA
ATP8B1	5205
HCG27	253018
ZNF26	7574
LIMK2	3985
CLIC4	25932
ARSD	414
ANKRD32	NA
SLC1A3	6507
REPS2	9185
CD55	1604
TLR10	81793
DSE	29940
ZNF775	285971
WWC3	55841
PTAR1	375743
EFCAB12	90288
ZAP70	7535
ZNF439	90594
FPR2	2358
MBOAT2	129642
KPNA6	23633
SLC17A6	57084
KIF20A	10112
CAPN3	825
PPP4C	5531
TMEM165	55858
AATK	9625
BRWD1	54014
PLEKHG3	26030
PPP1R35	221908
KCNE3	10008
URGCP	55665
MMP26	56547
HTRA1	5654
EFEMP2	30008
SNRNP40	9410
STS	412
HMP19	NA
SH2D2A	9047
TWIST1	7291
SPATA2L	124044
FKBP5	2289
GALNT15	117248
CYP4F2	8529
SGMS2	166929
SMG5	23381
RNASE2	6036
TMCO3	55002
ZNF33B	7582
IL21R	50615
KRCC1	51315
NFIB	4781
TFEB	7942
MRPL12	6182
PDLIM7	9260
COL9A2	1298
SULT1C2	6819
SH3BP5L	80851
PRMT5	10419
TMEM185B	79134
PRC1	9055
ACSL1	2180
FCGR1B	2210
GDPD3	79153
EPHB4	2050
MTL5	NA
FMNL3	91010
ANXA9	8416
SLC38A5	92745
KNOP1	400506
ZNF705G	100131980
AGTPBP1	23287
FOCAD	54914
KLHL8	57563
HES1	3280
KCNA1	3736
MXD3	83463
CDCA2	157313
SLC22A15	55356
TPST1	8460
TUBB6	84617
GRIP2	80852
SKI	6497
CD58	965
LCAT	3931
ATP6V1C2	245973
DLGAP5	9787
ABHD4	63874
VAV3	10451
C7orf34	NA
EED	8726
UBE2C	11065
B3GALT1	8708
PLCB4	5332
ERI3	79033
ANKRD55	79722
TMEM234	56063
HDAC11	79885
CCM2L	140706
KCNRG	283518
HELZ2	85441
RNF217	154214
METTL20	NA
NLRX1	79671
ZNF793	390927
METTL6	131965
USP43	124739
ODF3B	440836
TAF8	129685
CEP290	80184
SCN11A	11280
CCR2	729230
ZNF30	90075
ADAT3	113179
DDIT4L	115265
EPHB1	2047
TTPA	7274
CREB1	1385
ITPRIP	85450
KIF11	3832
RAB32	10981
GAPT	202309
GPR84	53831
LRRC4	64101
IL17RE	132014
NEK6	10783
TENM2	57451
PLOD1	5351
RAB43	339122
C16orf46	123775
FUT8	2530
VPS54	51542
LRP5L	91355
NAA25	80018
SAMD9L	219285
SSMEM1	136263
C5orf63	401207
PRMT2	3275
PAQR6	79957
ESF1	51575
PLB1	151056
ATP10D	57205
KAT2B	8850
SPAG9	9043
DLGAP4	22839
PTPRCAP	5790
EMR1	NA
PXK	54899
GK	2710
SRD5A3	79644
POC1A	25886
DBN1	1627
RRAGD	58528
ZNF593	51042
MKKS	8195
ZNF462	58499
PLA2G15	23659
LPAR2	9170
EXOC6B	23233
RRP12	23223
DPF3	8110
ZNF281	23528
FBXO28	23219
TCTEX1D2	255758
QPCT	25797
KIF4A	24137
FGF9	2254
INVS	27130
ADIRF	10974
XPO4	64328
N6AMT1	29104
PABPC1L	80336
CDK14	5218
FRAT1	10023
SFR1	119392
DSC2	1824
LIN54	132660
PPP2R1B	5519
CC2D2B	387707
C10orf32	NA
GLT1D1	144423
CRISPLD2	83716
TMEM88	92162
ENOX1	55068
FCHSD2	9873
SIPA1L2	57568
TACR1	6869
DENND1B	163486
SNX29	92017
ZNF160	90338
MTMR11	10903
TCAP	8557
INTS7	25896
TFDP1	7027
ANKRD39	51239
USP49	25862
ZNF432	9668
TCTE3	6991
LMNB1	4001
MBOAT7	79143
SMPDL3A	10924
RNF141	50862
PSD3	23362
C11orf63	NA
VMP1	81671
MATK	4145
MAN1C1	57134
ZNF595	152687
ZCCHC18	644353
GRIP1	23426
PPIL1	51645
SATB2	23314
C5orf42	NA
SBF2	81846
AVIL	10677
RCBTB1	55213
NPHP1	4867
HMOX1	3162
SELP	6403
PREX1	57580
MME	4311
COX6C	1345
PRKCI	5584
CCNB1	891
COPS2	9318
ABCC2	1244
MEGF9	1955
VNN1	8876
NUSAP1	51203
TCN1	6947
LAMTOR3	8649
FHOD3	80206
FBXO38	81545
NR2F2	7026
PGLYRP1	8993
ITPR3	3710
EBF1	1879
IFI6	2537
CTGF	NA
FAM76B	143684
GPR27	2850
CDKN3	1033
KCNJ15	3772
STOM	2040
PPM1F	9647
DGAT2	84649
SPATA6	54558
DCAKD	79877
SNRPG	6637
FCGR1A	2209
KHDRBS3	10656
IRF7	3665
HCN3	57657
GOLM1	51280
CREB5	9586
KIAA0226L	NA
NPTXR	23467
TOMM5	401505
MOB4	25843
LRP10	26020
PSRC1	84722
LYG1	129530
MIS18A	54069
ACOT7	11332
RLTPR	NA
CGRRF1	10668
PLA2G4A	5321
USP8	9101
KATNAL1	84056
RPL34	6164
NAIP	4671
PSG1	5669
RORC	6097
COX7C	1350
CYB5R4	51167
CYP4F3	4051
MPZL2	10205
ZFAND3	60685
SPAG6	9576
TBX19	9095
CDH24	64403
ZNF385A	25946
STK32B	55351
ENAH	55740
SLC37A3	84255
TNFRSF10C	8794
ABCC10	89845
EPB41L1	2036
PDZD8	118987
SIPA1	6494
TMEM170B	100113407
CLEC4E	26253
GALNT3	2591
SRBD1	55133
JAKMIP1	152789
ADAP2	55803
PEG3	5178
ST6GALNAC2	10610
SALL3	27164
GRN	2896
MPHOSPH9	10198
MT1E	4493
ANKRD49	54851
C1orf226	400793
LMBRD2	92255
JUP	3728
AMOTL2	51421
C17orf104	NA
C9orf78	51759
UGT2B28	54490
SLPI	6590
LONRF1	91694
ZNF594	84622
STMN1	3925
KCNN4	3783
RNASE4	6038
CCDC168	643677
EVA1B	55194
GPM6A	2823
OPA1	4976
RNPEP	6051
NDUFB2	4708
TAF1D	79101
CTRC	11330
MYL5	4636
LIMCH1	22998
SMUG1	23583
DHRS3	9249
MFN2	9927
CBY3	646019
INPP5B	3633
LPAR6	10161
C3orf62	375341
NIPSNAP3A	25934
ASPRV1	151516
GRB14	2888
DOCK3	1795
LSMEM1	286006
ARSB	411
FADD	8772
MTFR2	113115
TRPM6	140803
SERPINB9	5272
RFX2	5990
HIST1H1T	NA
GAS2L1	10634
NECAP1	25977
OSGIN2	734
FGD4	121512
MMP25	64386
PHACTR1	221692
NETO2	81831
MYCT1	80177
SAMSN1	64092
KYNU	8942
CNTN4	152330
SERPINB2	5055
SECTM1	6398
KLHL34	257240
FLT3	2322
SLIT1	6585
PRRT2	112476
HNMT	3176
PIGW	284098
FAM26F	NA
SYN2	6854
LSM3	27258
MTMR7	9108
GLIS2	84662
CD36	948
SLC5A9	200010
TNFSF18	8995
DNAL1	83544
SLC15A1	6564
HHAT	55733
PLD1	5337
TUB	7275
DNAH11	8701
IL23A	51561
NSUN7	79730
KCNG1	3755
TP53I3	9540
ACTA2	59
ACP5	54
NKAP	79576
SLC11A1	6556
RHEBL1	121268
ZNF77	58492
RGL1	23179
EFCAB2	84288
ZFYVE16	9765
ADCY10	55811
PIWIL1	9271
GPR19	2842
SLC18B1	116843
HAT1	8520
HAL	3034
NUP62CL	54830
ANKRD36	375248
GLB1L2	89944
COL1A2	1278
ZNF570	148268
FKBP1B	2281
ZNF777	27153
TBCE	6905
AFF3	3899
STRBP	55342
RBM45	129831
ADRB2	154
DDIAS	220042
TP53I11	9537
TECPR2	9895
ST20	400410
PAXBP1	94104
FSD1L	83856
ZNF551	90233
SLC22A18	5002
HIP1R	9026
MOSPD1	56180
APIP	51074
POF1B	79983
TMEM8A	NA
ERCC8	1161
ARID5B	84159
SPRY1	10252
GCM1	8521
ZMYND15	84225
ITM2C	81618
ST3GAL6	10402
FAM114A1	92689
SULT1B1	27284
MAOA	4128
WFDC8	90199
PRKAB2	5565
C1orf21	81563
RHOH	399
HOXA13	3209
CYP2C9	1559
ITPRIPL1	150771
CLDN8	9073
DDR2	4921
TRIB1	10221
STEAP3	55240
ATRNL1	26033
SKIL	6498
ZMAT4	79698
CR2	1380
ZNF585A	199704
RBFOX1	54715
MPO	4353
ZNF239	8187
CD27	939
HOXB3	3213
BMPR1B	658
C3AR1	719
KREMEN1	83999
KCNJ13	3769
ZFP14	57677
ASGR2	433
NRBF2	29982
B3GAT2	135152
ACVR1	90
IL18R1	8809
C5	727
OSBPL10	114884
C3orf70	285382
GLDC	2731
CAP2	10486
RPS6KB1	6198
PIFO	128344
HMGB2	3148
MLF2	8079
CCDC23	NA
CMTM1	113540
PAPSS2	9060
CBR3	874
CLN8	2055
ACP1	52
SEMG1	6406
TBC1D19	55296
BDNF	627
DHRS13	147015
TPH1	7166
ZNF507	22847
VANGL2	57216
ZWINT	11130
CACNG8	59283
FREM3	166752
SETD9	133383
AMDHD1	144193
TCL1A	8115
MKRN1	23608
CASQ1	844
OAS1	4938
STON2	85439
BEX2	84707
FAM209B	388799
NT5DC4	284958
FMNL2	114793
ANKRD9	122416
SLC35G2	80723
PNPLA1	285848
SLC4A8	9498
IFIT5	24138
NCEH1	57552
BIRC5	332
RSL24D1	51187
BAK1	578
PROX1	5629
SIGLEC8	27181
WDR41	55255
GNGT1	2792
RPH3A	22895
QPRT	23475
FBXL13	222235
ZNF649	65251
AXIN2	8313
STXBP5	134957
SFTPB	6439
SPOCK1	6695
SYNGR3	9143
NQO2	4835
ZNF470	388566
CD109	135228
FOLR3	2352
COMMD6	170622
SEMA4A	64218
ZNF625	90589
EPHX2	2053
ARHGAP32	9743
EFNA5	1946
CYP1B1	1545
PENK	5179
LRRK1	79705
HIST1H3I	NA
DRC1	92749
SOX30	11063
CEP128	145508
VCPKMT	79609
HBEGF	1839
ANKRD30B	374860
CD274	29126
FFAR2	2867
BEST1	7439
C12orf42	374470
ETV5	2119
TOPORS	10210
CSNK1E	1454
SRRM5	100170229
NOG	9241
NFIA	4774
NOV	NA
YOD1	55432
KCNV1	27012
ABCG1	9619
CLEC12B	387837
EDIL3	10085
NANOG	79923
POU6F1	5463
PRSS35	167681
NUDT13	25961
CCDC141	285025
PBK	55872
UNC93A	54346
ROPN1L	83853
LACE1	NA
PDE9A	5152
MROH6	642475
GADD45A	1647
CCPG1	9236
C9orf84	NA
GNAZ	2781
SIGLEC5	8778
ATP7B	540
SIAH3	283514
LONRF2	164832
P2RX5	5026
COL4A3	1285
NHSL2	340527
NLGN3	54413
FOSB	2354
CORO2B	10391
TMEM261	NA
TMEM136	NA
MCOLN2	255231
IFITM10	402778
RILPL1	353116
CDKN2B	1030
ELAVL2	1993
KANK3	256949
PRL	5617
C5orf30	90355
RAB18	22931
SEMA3C	10512
POU3F2	5454
NRG1	3084
MXRA7	439921
CCR7	1236
HMMR	3161
MB21D1	NA
FCRL1	115350
ZNF608	57507
ZNF23	7571
UPB1	51733
VEGFA	7422
BTNL3	10917
PTMS	5763
ESM1	11082
PTRHD1	391356
CCDC14	64770
CCDC88C	440193
PLS1	5357
RNASE1	6035
ZNF549	256051
OR2B6	26212
PPEF1	5475
SOX8	30812
TSGA10	80705
USP44	84101
HTR2A	3356
TDRD10	126668
RS1	6247
UCN	7349
FRMD4B	23150
USF1	7391
ZNF697	90874
SPAG17	200162
TMC4	147798
KIAA1257	57501
CDCA7	83879
KL	9365
HIST1H2AE	NA
PMEPA1	56937
CCL8	6355
SLC7A5	8140
NELL2	4753
ADM	133
SNX31	169166
COL4A1	1282
RECK	8434
TSPAN13	27075
RSPH1	89765
METTL7B	196410
GBP6	163351
SYTL2	54843
ZNF781	163115
MEST	4232
EXTL2	2135
ZNF765	91661
CABP5	56344
FAM217A	222826
SLC51A	200931
SCN9A	6335
CCDC70	83446
IL1RAP	3556
RAB2B	84932
HIP1	3092
FBXO32	114907
SDC1	6382
CHST13	166012
GPR22	2845
PAM	5066
CLEC2B	9976
ZNF404	342908
C2orf15	150590
C9orf66	NA
C9orf47	286223
CILP	8483
KCNH8	131096
CLSPN	63967
C1orf56	54964
LANCL3	347404
PTX3	5806
SOCS3	9021
ZKSCAN3	80317
B4GALT5	9334
KDM4D	55693
GFPT2	9945
CASC5	NA
NT5E	4907
COL5A1	1289
MERTK	10461
CLIC2	1193
FHDC1	85462
DOCK4	9732
SLC36A1	206358
PDX1	3651
AGO2	27161
ADCYAP1R1	117
SFRP2	6423
NECAB2	54550
HORMAD1	84072
NCAM1	4684
VSIG10L	147645
CHN1	1123
RAD51B	5890
LAMP5	24141
TRAPPC3L	100128327
SPON1	10418
ZNF665	79788
CDK5R1	8851
CLCN4	1183
LARGE	NA
CELSR1	9620
IKBIP	121457
CAPN5	726
SLC7A11	23657
AOC2	314
SH3RF1	57630
ANLN	54443
WLS	79971
STEAP1	26872
KIAA1107	23285
B3GNT5	84002
SLC38A6	145389
CAMSAP2	23271
PNMA3	29944
PFDN4	5203
TEX12	56158
PLK2	10769
IP6K3	117283
MTUS1	57509
PTGR1	22949
SMAD1	4086
TBC1D12	23232
PKD1L1	168507
ADRA1A	148
NMNAT2	23057
LRRC6	23639
RPIA	22934
DOCK9	23348
GYPC	2995
SLC7A9	11136
SLFN12	55106
RAB20	55647
PARM1	25849
PDZK1IP1	10158
LRRN1	57633
KBTBD3	143879
GRB10	2887
DPPA2	151871
SIGLEC6	946
CCNJL	79616
CD79A	973
ZNF619	285267
TNNI3K	51086
TCL1B	9623
RMDN2	151393
ELOVL4	6785
GPX8	493869
FRRS1	391059
USP18	11274
EIF2AK1	27102
MACROD2	140733
ZNF138	7697
NAT1	9
VASH1	22846
ZNF850	342892
SGK2	10110
ZNF132	7691
DHRS9	10170
MYO3A	53904
ZNF415	55786
TENM1	10178
CEACAM5	1048
DSEL	92126
SYCP3	50511
KIR2DL4	3805
CD22	933
CACNA2D1	781
DCAF10	79269
TMEM92	162461
ZNF268	10795
E2F8	79733
RCAN2	10231
ATF3	467
IL1RL1	9173
DTHD1	401124
SLC25A40	55972
COPZ2	51226
RLN2	6019
C1orf115	79762
ADAM9	8754
ADORA2B	136
PLAC8L1	153770
CISD2	493856
PADI4	23569
HIST1H4E	NA
ZNF492	57615
CA4	762
RBP7	116362
TPPP3	51673
B3GALT2	8707
AIM2	9447
TAF4B	6875
AGBL3	340351
TRIM6	117854
CADM1	23705
FPR3	2359
C4orf26	NA
PANX3	116337
AADAT	51166
CNTNAP2	26047
ANGPT1	284
CCDC7	79741
CLDN23	137075
C1QB	713
SAMD4A	23034
ANKRD18A	253650
TNIP3	79931
DEFA4	1669
ZNF610	162963
CAMP	820
FHL2	2274
ELFN1	392617
ASPN	54829
SLCO4C1	353189
FCRL2	79368
TEK	7010
MAP3K7CL	56911
DGKK	139189
ABHD17C	58489
GZMH	2999
NXF3	56000
TPX2	22974
KIF27	55582
CD34	947
ZC3H12C	85463
DNAJC6	9829
CDC20	991
ARHGAP29	9411
HOOK1	51361
VWDE	221806
POLR2K	5440
NCAPH	23397
CCDC62	84660
NET1	10276
KLHL14	57565
TREML1	340205
SLC22A16	85413
RERGL	79785
SPX	80763
HERC5	51191
DPM2	8818
FAM132B	NA
SSTR2	6752
ISM1	140862
HOXC10	3226
BUB1	699
MADCAM1	8174
GPR34	2857
OSBPL6	114880
CMTM5	116173
CALD1	800
TBC1D30	23329
WDR86	349136
FGF13	2258
PBX1	5087
ATP8A2	51761
SCN7A	6332
THBS1	7057
NRIP3	56675
SNX7	51375
EMP1	2012
KIAA1045	NA
BMP8A	353500
BRS3	680
PCDH9	5101
[truncated: 268 more rows]
