# Supplementary material for: Comprehensive Analysis of Hub Genes Associated With Competing Endogenous RNA Networks in Stroke Using Bioinformatics Analysis
Source: Frontiers journal article supplement (doi:10.3389/fgene.2021.779923), 2022-01-12
Supplement: Data_Sheet_7.ZIP [file Data_Sheet_7.ZIP]

## Sheet: Sheet1
Outcome	LINC00550
control	-4.71918
control	-4.0081
control	-5.56656
control	-4.87583
control	-4.56943
control	-4.70272
control	-4.812
control	-4.78899
control	-3.82442
control	-5.60847
control	-4.32741
control	-4.71631
control	-4.46278
control	-4.52258
control	-4.34334
control	-5.21737
control	-4.83511
control	-4.88493
control	-3.86904
control	-3.62459
control	-3.52418
control	-4.66243
control	-4.72744
stroke	-5.26044
stroke	-5.82794
stroke	-5.79383
stroke	-5.53878
stroke	-5.9909
stroke	-6.05214
stroke	-5.7075
stroke	-5.49942
stroke	-5.65683
stroke	-5.87048
stroke	-5.19383
stroke	-5.25716
stroke	-5.46089
stroke	-4.96837
stroke	-5.04524
stroke	-5.43532
stroke	-5.62297
stroke	-5.94918
stroke	-5.51928
stroke	-5.40864
stroke	-5.13928
stroke	-5.38346
stroke	-5.59949
