# Supplementary material for: Comprehensive Analysis of Hub Genes Associated With Competing Endogenous RNA Networks in Stroke Using Bioinformatics Analysis
Source: Frontiers journal article supplement (doi:10.3389/fgene.2021.779923), 2022-01-12
Supplement: Data_Sheet_8.ZIP [file Data_Sheet_8.ZIP]

## Sheet: miRWalk_miRNA_Targets
mirnaid	refseqid	genesymbol	duplex	start	end	bindingp	energy	seed	accessibility	au	phylopstem	phylopflank	me	number_of_pairings	binding_region_length	longest_consecutive_pairings	position	validated	TargetScan	miRDB
hsa-miR-103a-3p	NM_138962	MSI2	.((((((......(((((((((.&)))))))))..)))))).	4839	4857	0.953846	-19.3	1	0.00103105	0.574	7.41655	3.71495	-15.8666	15	18	9	3UTR		1	1
hsa-miR-103a-3p	NM_001322250	MSI2	.((((((......(((((((((.&)))))))))..)))))).	4742	4760	0.953846	-19.3	1	0.00103105	0.574	7.41655	3.71495	-15.8666	15	18	9	3UTR		1	1
hsa-miR-103a-3p	NM_175634	RUNX1T1	..((((.(((((((((((((((.&)))))))))))).)))..)))).	6290	6313	0.961538	-23.4	1	0.000160921	0.544	6.25526	6.1853	-6.50069	19	23	12	3UTR	MIRT027124	1	1
hsa-miR-103a-3p	NM_175635	RUNX1T1	..((((.(((((((((((((((.&)))))))))))).)))..)))).	5791	5814	0.961538	-23.4	1	0.000160921	0.544	4.57732	5.5353	-6.50069	19	23	12	3UTR	MIRT027124	1	1
hsa-miR-103a-3p	NM_175636	RUNX1T1	..((((.(((((((((((((((.&)))))))))))).)))..)))).	5905	5928	0.961538	-23.4	1	0.000160921	0.544	5.81097	4.41073	-6.50069	19	23	12	3UTR	MIRT027124	1	1
hsa-miR-103a-3p	XM_024448113	PLEKHA1	((((((((((..(((((((....&))))))).....)).)))))))).	4560	4584	0.961538	-19.4	1	0.0388495	0.706	0	0	-10.1092	17	24	8	3UTR	MIRT055813	1	1
hsa-miR-103a-3p	XM_024448114	PLEKHA1	((((((((((..(((((((....&))))))).....)).)))))))).	2861	2885	0.961538	-19.4	1	0.0388495	0.706	0	0	-10.1092	17	24	8	3UTR	MIRT055813	1	1
hsa-miR-103a-3p	NM_003583	DYRK2	(((((((((.(((((((......&.))))))).))))))))).	5776	5823	0.961538	-21.4	1	0.0265064	0.691	5.41221	4.30088	-5.18008	16	19	9	3UTR	MIRT027110	1	1
hsa-miR-103a-3p	NM_004349	RUNX1T1	..((((.(((((((((((((((.&)))))))))))).)))..)))).	5677	5700	0.961538	-23.4	1	0.000160921	0.544	5.80749	5.64842	-6.50069	19	23	12	3UTR	MIRT027124	1	1
hsa-miR-103a-3p	NM_006482	DYRK2	(((((((((.(((((((......&))))))).))))))))).	5954	5972	0.961538	-21.2	1	0.0265064	0.691	5.75087	4.20625	-5.18008	16	18	9	3UTR	MIRT027110	1	1
hsa-miR-103a-3p	NM_001349338	FOXP1	.((((((((((((((.((((((.&)))))).))....))))).))))))).	6945	6972	0.961538	-23.4	1	0.00917216	0.603	1.04953	1.35714	-4.02637	20	27	7	3UTR		1	1
hsa-miR-103a-3p	NM_001349340	FOXP1	.((((((((((((((.((((((.&)))))).))....))))).))))))).	6850	6877	0.961538	-23.4	1	0.00917216	0.603	1.04953	1.35714	-4.02637	20	27	7	3UTR		1	1
hsa-miR-103a-3p	NM_001349341	FOXP1	.((((((((((((((.((((((.&)))))).))....))))).))))))).	6942	6969	0.961538	-23.4	1	0.00917216	0.603	1.04953	1.35714	-4.02637	20	27	7	3UTR		1	1
hsa-miR-103a-3p	NM_001126336	VCAN	.(((((((((((((((((.....&)))).))))).)))))))).	3209	3229	0.961538	-20.7	1	0.00359834	0.706	4.85853	4.61648	-3.79332	17	20	8	3UTR	MIRT314708	1	1
hsa-miR-103a-3p	NM_001198625	RUNX1T1	..((((.(((((((((((((((.&)))))))))))).)))..)))).	6179	6202	0.961538	-23.4	1	0.000160921	0.544	5.87449	5.77028	-6.50069	19	23	12	3UTR	MIRT027124	1	1
hsa-miR-103a-3p	NM_001198626	RUNX1T1	..((((.(((((((((((((((.&)))))))))))).)))..)))).	6037	6060	0.961538	-23.4	1	0.000160921	0.544	6.30339	6.11782	-6.50069	19	23	12	3UTR	MIRT027124	1	1
hsa-miR-103a-3p	NM_001198627	RUNX1T1	..((((.(((((((((((((((.&)))))))))))).)))..)))).	6097	6120	0.961538	-23.4	1	0.000160921	0.544	4.54856	5.69839	-6.50069	19	23	12	3UTR	MIRT027124	1	1
hsa-miR-103a-3p	NM_001198628	RUNX1T1	..((((.(((((((((((((((.&)))))))))))).)))..)))).	5870	5893	0.961538	-23.4	1	0.000160921	0.544	3.18944	5.26155	-6.50069	19	23	12	3UTR	MIRT027124	1	1
hsa-miR-103a-3p	NM_001198631	RUNX1T1	..((((.(((((((((((((((.&)))))))))))).)))..)))).	5893	5916	0.961538	-23.4	1	0.000160921	0.544	5.54411	4.5473	-6.50069	19	23	12	3UTR	MIRT027124	1	1
hsa-miR-103a-3p	NM_001198632	RUNX1T1	..((((.(((((((((((((((.&)))))))))))).)))..)))).	5955	5978	0.961538	-23.4	1	0.000160921	0.544	5.29294	5.83337	-6.50069	19	23	12	3UTR	MIRT027124	1	1
hsa-miR-103a-3p	NM_001198633	RUNX1T1	..((((.(((((((((((((((.&)))))))))))).)))..)))).	6117	6140	0.961538	-23.4	1	0.000160921	0.544	5.89453	5.90038	-6.50069	19	23	12	3UTR	MIRT027124	1	1
hsa-miR-103a-3p	NM_001198634	RUNX1T1	..((((.(((((((((((((((.&)))))))))))).)))..)))).	5720	5743	0.961538	-23.4	1	0.000160921	0.544	5.70399	5.5488	-6.50069	19	23	12	3UTR	MIRT027124	1	1
hsa-miR-103a-3p	NM_001198679	RUNX1T1	..((((.(((((((((((((((.&)))))))))))).)))..)))).	5864	5887	0.961538	-23.4	1	0.000160921	0.544	2.16123	4.94602	-6.50069	19	23	12	3UTR	MIRT027124	1	1
hsa-miR-103a-3p	NM_001244808	FOXP1	.((((((((((((((.((((((.&)))))).))....))))).))))))).	6942	6969	0.961538	-23.4	1	0.00917216	0.603	1.04953	1.35714	-4.02637	20	27	7	3UTR		1	1
hsa-miR-103a-3p	NM_001206884	CTNND1	((((((((..((((((((...((&.))....))))))))..))).))))).	3767	3813	0.974359	-24.7	1	0.00108885	0.456	1.75034	2.66539	-6.23647	18	27	8	3UTR		1	1
hsa-miR-103a-3p	NM_001206886	CTNND1	((((((((..((((((((...((&.))....))))))))..))).))))).	3836	3882	0.974359	-24.7	1	0.00108885	0.456	1.15014	1.19446	-6.23647	18	27	8	3UTR		1	1
hsa-miR-103a-3p	NM_001206887	CTNND1	((((((((..((((((((...((&.))....))))))))..))).))))).	3773	3819	0.974359	-24.7	1	0.00108885	0.456	1.37574	0.668328	-6.23647	18	27	8	3UTR		1	1
hsa-miR-103a-3p	NM_001206889	CTNND1	((((((((..((((((((...((&.))....))))))))..))).))))).	3868	3914	0.974359	-24.7	1	0.00108885	0.456	1.17431	0.913264	-6.23647	18	27	8	3UTR		1	1
hsa-miR-103a-3p	NM_001206890	CTNND1	((((((((..((((((((...((&.))....))))))))..))).))))).	3591	3637	0.974359	-24.7	1	0.00108885	0.456	1.79471	0.766625	-6.23647	18	27	8	3UTR		1	1
hsa-miR-103a-3p	NM_001256129	ARL8A	..(((((....((((((((.((.&)).))))))))..))))).	789	808	1	-20	1	0.000747194	0.5	0.102515	-0.0945719	-12.3943	15	19	8	3UTR	MIRT027168	1	1
hsa-miR-103a-3p	NM_001256830	ASIC1	.(((((((....(((((((....&)))))))))))))).	2304	2319	1	-22.4	1	2.47e-06	0.485	1.2579	0.38107	-12.2638	14	15	14	3UTR		1	1
hsa-miR-103a-3p	NM_001270726	BCL2L13	.((((((((.(((((((......&)))))))..)))))))).	2393	2411	1	-21.4	1	0.0109907	0.544	2.12634	0.00934246	-5.03583	15	18	8	3UTR		1	1
hsa-miR-103a-3p	NM_001270727	BCL2L13	.((((((((.(((((((......&)))))))..)))))))).	2249	2267	1	-21.4	1	0.0109907	0.544	2.12634	0.00934246	-5.03583	15	18	8	3UTR		1	1
hsa-miR-103a-3p	NM_001270728	BCL2L13	(((((((((((.(((((((..((&))..)))))))..)).))))))))).	1562	1588	1	-23.2	1	7.26e-05	0.426	0.347268	0.636313	-7.28438	20	26	9	3UTR		1	1
hsa-miR-103a-3p	NM_001270728	BCL2L13	(((((...(((((((((((....&))))))).))))...))))).	955	976	1	-21.2	1	0.00112717	0.574	3.78841	3.01445	-9.69585	16	21	7	3UTR		1	1
hsa-miR-103a-3p	NM_001270729	BCL2L13	(((((((((((.(((((((..((&))..)))))))..)).))))))))).	1740	1766	1	-23.2	1	7.26e-05	0.426	0.347268	0.636313	-7.28438	20	26	9	3UTR		1	1
hsa-miR-103a-3p	NM_001270731	BCL2L13	(((((((((((.(((((((..((&))..)))))))..)).))))))))).	1827	1853	1	-23.2	1	7.26e-05	0.426	0.347268	0.636313	-7.28438	20	26	9	3UTR		1	1
hsa-miR-103a-3p	NM_001270732	BCL2L13	(((((((((((.(((((((..((&))..)))))))..)).))))))))).	1670	1696	1	-23.2	1	7.26e-05	0.426	0.347268	0.636313	-7.28438	20	26	9	3UTR		1	1
hsa-miR-103a-3p	NM_001270732	BCL2L13	(((((...(((((((((((....&))))))).))))...))))).	1063	1084	1	-21.2	1	0.00112717	0.574	3.78841	3.01445	-9.69585	16	21	7	3UTR		1	1
hsa-miR-103a-3p	NM_001270734	BCL2L13	(((((((((((.(((((((..((&))..)))))))..)).))))))))).	1683	1709	1	-23.2	1	7.26e-05	0.426	0.347268	0.636313	-7.28438	20	26	9	3UTR		1	1
hsa-miR-103a-3p	NM_001270734	BCL2L13	(((((...(((((((((((....&))))))).))))...))))).	1076	1097	1	-21.2	1	0.00112717	0.574	3.78841	3.01445	-9.69585	16	21	7	3UTR		1	1
hsa-miR-103a-3p	NM_001270735	BCL2L13	(((((((((((.(((((((..((&))..)))))))..)).))))))))).	1526	1552	1	-23.2	1	7.26e-05	0.426	0.347268	0.636313	-7.28438	20	26	9	3UTR		1	1
hsa-miR-103a-3p	NM_001270735	BCL2L13	(((((...(((((((((((....&))))))).))))...))))).	919	940	1	-21.2	1	0.00112717	0.574	3.78841	3.01445	-9.69585	16	21	7	3UTR		1	1
hsa-miR-103a-3p	NM_001270942	KLF7	((((((((((((((((.......&))))....)))))))))))).	4425	4446	1	-21.1	1	0.0995533	0.515	1.50985	1.60368	-3.93757	16	21	12	3UTR		1	1
hsa-miR-103a-3p	NM_001270943	KLF7	((((((((((((((((.......&))))....)))))))))))).	4394	4415	1	-21.1	1	0.0995533	0.515	1.69015	1.93208	-3.93757	16	21	12	3UTR		1	1
hsa-miR-103a-3p	NM_001270944	KLF7	((((((((((((((((.......&))))....)))))))))))).	4358	4379	1	-21.1	1	0.0995533	0.515	2.00291	1.58436	-3.93757	16	21	12	3UTR		1	1
hsa-miR-103a-3p	NM_001271033	NEDD9	.(((((((((...((((((....&))).)))..))))))))).	2559	2578	1	-20.1	1	0.00230651	0.676	1.90171	1.53992	-11.254	15	19	9	3UTR		1	1
hsa-miR-103a-3p	NM_001271629	MEF2D	.(((.((((((((((((((....&))))))))..........))))))))).	2736	2764	1	-22.5	1	0.000129226	0.412	0.339511	0.631858	-7.91236	17	28	9	3UTR	MIRT732398	1	1
hsa-miR-103a-3p	NM_001271904	GSKIP	((((((((.((((((........&.)))))).)))))))).	2147	2179	1	-22.7	1	0.00560965	0.706	0.521215	1.22156	-5.22701	14	17	8	3UTR		1	1
hsa-miR-103a-3p	NM_001271905	GSKIP	((((((((.((((((........&.)))))).)))))))).	1626	1658	1	-22.7	1	0.00560965	0.706	1.76221	1.79341	-5.22701	14	17	8	3UTR		1	1
hsa-miR-103a-3p	NM_001271906	GSKIP	((((((((.((((((........&.)))))).)))))))).	1558	1590	1	-22.7	1	0.00560965	0.706	1.76221	1.79341	-5.22701	14	17	8	3UTR		1	1
hsa-miR-103a-3p	NM_001276277	PPIP5K2	..((((((((.(((((((((...&)))))))....)).)))))))).	6351	6374	1	-21.8	1	4.8e-05	0.515	0.301409	-0.0498642	-7.78178	17	23	8	3UTR		1	1
hsa-miR-103a-3p	NM_001278547	MAPK8	.((((((((....((((((....&))))))....)))))))).	4687	4706	1	-21.3	1	0.050946	0.559	0.327305	0.590156	-12.4965	14	19	8	3UTR		1	1
hsa-miR-103a-3p	NM_001278548	MAPK8	.((((((((....((((((....&))))))....)))))))).	4319	4338	1	-21.3	1	0.050946	0.559	0.219136	0.420331	-12.4965	14	19	8	3UTR		1	1
hsa-miR-103a-3p	NM_001281471	PPIP5K2	..((((((((.(((((((((...&)))))))....)).)))))))).	6456	6479	1	-21.8	1	4.8e-05	0.515	0.301409	-0.0498642	-7.78178	17	23	8	3UTR		1	1
hsa-miR-103a-3p	NM_001282787	NFIB	(((.((((((((((.((((((((&)))))))).)))))))).)).))).	2856	2881	1	-26.6	1	0.00237096	0.676	2.03116	1.87011	-7.70505	21	25	8	3UTR		1	1
hsa-miR-103a-3p	NM_001285389	RCAN1	.(((((((((.((((((......&))))))..))))))))).	720	738	1	-21.2	1	0.00129298	0.485	-0.314722	0.307509	-6.6181	15	18	9	3UTR		1	1
hsa-miR-103a-3p	NM_001285391	RCAN1	.(((((((((.((((((......&))))))..))))))))).	1043	1061	1	-21.2	1	0.00129298	0.485	0.702477	0.167912	-6.6181	15	18	9	3UTR		1	1
hsa-miR-103a-3p	NM_001286233	SLC2A14	.((.((((((((((.((((....&))))..)))))))))).)).	3757	3777	1	-21.2	1	0.00204721	0.529	2.38837	2.02166	-7.5608	16	20	10	3UTR		1	1
hsa-miR-103a-3p	NM_001286234	SLC2A14	.((.((((((((((.((((....&))))..)))))))))).)).	3003	3023	1	-21.2	1	0.00204721	0.529	4.25416	2.92075	-7.5608	16	20	10	3UTR		1	1
hsa-miR-103a-3p	NM_001286235	SLC2A14	.((.((((((((((.((((....&))))..)))))))))).)).	3301	3321	1	-21.2	1	0.00204721	0.529	0.688457	1.17914	-7.5608	16	20	10	3UTR		1	1
hsa-miR-103a-3p	NM_001286237	SLC2A14	.((.((((((((((.((((....&))))..)))))))))).)).	3020	3040	1	-21.2	1	0.00204721	0.529	4.21322	2.76957	-7.5608	16	20	10	3UTR		1	1
hsa-miR-103a-3p	NM_001286646	SLC45A4	.((((((((((..(((((.....&.)))))..)))))))))).	6856	6897	1	-26.8	1	1.09e-05	0.309	3.01783	1.91886	-8.42926	15	19	10	3UTR		1	1
hsa-miR-103a-3p	NM_001287763	NSG1	((((((((((((((((((.....&))).))))..)).))))))))).	866	889	1	-20.5	1	0.00221014	0.559	3.26821	1.81974	-3.93757	18	23	9	3UTR		1	1
hsa-miR-103a-3p	NM_001289823	FURIN	..(((((((.(((((((((((((&)))))))).............))))).))))))).	4031	4066	1	-22.5	1	0.000558327	0.485	1.5917	1.65906	-6.19951	20	35	8	3UTR	MIRT027060	1	1
hsa-miR-103a-3p	NM_001289824	FURIN	..(((((((.(((((((((((((&)))))))).............))))).))))))).	4210	4245	1	-22.5	1	0.000558327	0.485	1.5917	1.65906	-6.19951	20	35	8	3UTR	MIRT027060	1	1
hsa-miR-103a-3p	NM_001301110	ADAMTSL3	.((((((.(((((((((((..((&.))..)))..))))))))..)))))).	6574	6620	1	-25.2	1	0.000189946	0.515	-0.366599	-0.240029	-6.10696	19	27	8	3UTR		1	1
hsa-miR-103a-3p	NM_001311162	THY1	....(((((.((((((((((((.&))))))))))....)).))))).	2110	2133	1	-24.1	1	0.00301001	0.426	-0.277519	-0.174786	-10.7891	17	23	10	3UTR		1	1
hsa-miR-103a-3p	NM_001311162	THY1	.(((((.((.(((((((((....&.))))))))).))))))).	3623	3647	1	-22.9	1	1.19e-05	0.456	0.158555	0.405048	-6.57952	16	19	9	3UTR		1	1
hsa-miR-103a-3p	NM_001313726	ANO3	((((((((.((((((..((((((&))))))..))))))............)))))))).	4037	4072	1	-21.4	1	0.0102124	0.574	0.708669	0.633771	-5.22701	20	35	8	3UTR		1	1
hsa-miR-103a-3p	NM_001313727	ANO3	((((((((.((((((..((((((&))))))..))))))............)))))))).	3227	3262	1	-21.4	1	0.0102124	0.574	0.757331	1.10404	-5.22701	20	35	8	3UTR		1	1
hsa-miR-103a-3p	NM_001314057	MBNL1	((((((((.((((((((((((((&))))))))))..)))).)))))))).	1994	2020	1	-23.6	1	0.0100648	0.647	4.82749	5.14596	-4.99396	22	26	10	3UTR		1	1
hsa-miR-103a-3p	NM_001317122	AGO1	(((((((((..((((((......&))))))..))))))))).	12720	12738	1	-25.4	1	0.0040005	0.559	0	0	-8.00486	15	18	9	3UTR	MIRT249123	1	1
hsa-miR-103a-3p	NM_001317122	AGO1	..((((.((((.(((((((((..&)))))))))...))))..)))).	3144	3167	1	-23.3	1	0.000163272	0.544	2.34254	2.66292	-9.84749	17	23	9	3UTR	MIRT249123	1	1
hsa-miR-103a-3p	NM_001317123	AGO1	(((((((((..((((((......&))))))..))))))))).	12625	12643	1	-25.4	1	0.0040005	0.559	0	0	-8.00486	15	18	9	3UTR	MIRT249123	1	1
hsa-miR-103a-3p	NM_001317123	AGO1	..((((.((((.(((((((((..&)))))))))...))))..)))).	3049	3072	1	-23.3	1	0.000163272	0.544	2.22448	2.65407	-9.84749	17	23	9	3UTR	MIRT249123	1	1
hsa-miR-103a-3p	NM_001317333	ARIH2	...(((((((.((((((((((((&)))))))))))).))))))).	3286	3307	1	-22.4	1	0.00158219	0.515	0.487986	0.42729	-9.33931	19	21	12	3UTR		1	1
hsa-miR-103a-3p	NM_001317333	ARIH2	.((..(((((((((.(((((...&)))))))))))))).)).	2491	2509	1	-21.9	1	7.56e-07	0.426	0.0390324	0.252749	-11.6798	16	18	14	3UTR		1	1
hsa-miR-103a-3p	NM_030808	NDEL1	.((((((..((...((((((((.&))))))))..))..)))))).	1529	1550	1	-24.2	1	0.0279543	0.529	0.799606	1.35144	-12.6561	16	21	8	3UTR	MIRT027032	1	1
hsa-miR-103a-3p	NM_031418	ANO3	((((((((.((((((..((((((&))))))..))))))............)))))))).	3631	3666	1	-21.4	1	0.0102124	0.574	1.74272	1.44832	-5.22701	20	35	8	3UTR		1	1
hsa-miR-103a-3p	NM_032184	SYDE2	.((((...((((((((((((...&)))))))).)))))))).	4312	4330	1	-20	1	0.00467974	0.603	5.64698	2.15969	-9.55161	16	18	8	3UTR		1	1
hsa-miR-103a-3p	NM_032440	LCOR	.((((..(((((((((((((...&.)))))))))...))))..)))).	6914	6960	1	-22.6	1	0.0382473	0.618	0.801314	0.71778	-7.23797	17	24	9	3UTR	MIRT027215	1	1
hsa-miR-103a-3p	NM_032449	CC2D1B	(((((((((((((((((((.(((&)))..)))))).)))))......)))))))).	3094	3126	1	-26	1	0.00601861	0.529	3.91645	4.6038	-3.93757	22	32	8	3UTR		1	1
hsa-miR-103a-3p	NM_032682	FOXP1	((((((...((((((((((....&.))))))))))..............)))))).	5108	5151	1	-24.7	1	0.00146904	0.544	6.75081	6.68347	-8.85129	16	32	10	3UTR		1	1
hsa-miR-103a-3p	NM_032875	FBXL20	.((((((((...(((((......&))))).)))))))).	9955	9970	1	-20.7	1	0.0010273	0.426	6.08738	5.59033	-11.2074	13	15	8	3UTR		1	1
hsa-miR-103a-3p	NM_033224	PURB	.(((((....((((.((((((..&))))))))))....))))).	4936	4956	1	-19.6	1	0.00276078	0.544	0.273594	0.503896	-10.685	15	20	10	3UTR	MIRT546886	1	1
hsa-miR-103a-3p	NM_057168	WNT16	.(((((.((((((((((......&)))))))))).))).)).	1461	1479	1	-21.8	1	0.000275614	0.471	-0.156955	-0.718965	-5.33701	15	18	10	3UTR		1	1
hsa-miR-103a-3p	NM_057175	NAA15	(((((((((((((((((((.(((&))))))))).)).....))))))))))).	5627	5656	1	-22.7	1	0.0125633	0.574	0.598345	0.737123	-3.93757	22	29	11	3UTR	MIRT027203	1	1
hsa-miR-103a-3p	NM_133486	MBNL3	.(((((((((((((((((.((((&.)))).)))..))))..)))))))))).	3339	3384	1	-22.2	1	0.00428121	0.574	2.43748	1.89276	-3.79332	21	28	10	3UTR		1	1
hsa-miR-103a-3p	NM_134260	RORA	.((((((.(((.((((((((...&))))))))))))))))).	7949	7967	1	-20.5	1	0.00126353	0.662	0.253024	0.505819	-9.45376	17	18	17	3UTR		1	1
hsa-miR-103a-3p	NM_134261	RORA	.((((((.(((.((((((((...&))))))))))))))))).	7778	7796	1	-20.5	1	0.00126353	0.662	0.711165	0.517273	-9.45376	17	18	17	3UTR		1	1
hsa-miR-103a-3p	NM_134262	RORA	.((((((.(((.((((((((...&))))))))))))))))).	7638	7656	1	-20.5	1	0.00126353	0.662	0.842063	1.1014	-9.45376	17	18	17	3UTR		1	1
hsa-miR-103a-3p	NM_138495	ATXN7L1	((((((((....((((((((...&.)))).)))))))))))).	2605	2643	1	-22.4	1	0.000524124	0.471	0.346974	0.0170685	-12.408	16	19	12	3UTR		1	1
hsa-miR-103a-3p	NM_138619	GGA3	.((((((((((.((((((.(((.&)))))))))...)))))))).)).	2271	2295	1	-24.9	1	0.000735292	0.412	1.65597	0.810786	-7.14013	19	24	9	3UTR	MIRT027133	1	1
hsa-miR-103a-3p	NM_139046	MAPK8	.((((((((....((((((....&))))))....)))))))).	4955	4974	1	-21.3	1	0.050946	0.559	0.219136	0.420331	-12.4965	14	19	8	3UTR		1	1
hsa-miR-103a-3p	NM_139279	MCFD2	((((((((((((((.(((((...&.)))))))))).))))))))).	764	799	1	-23.5	1	0.00198062	0.588	0.259287	0.392249	-4.67302	19	22	10	3UTR		1	1
hsa-miR-103a-3p	NM_145267	SDHAF4	((((((((....(((((((((.(&).))))))))).........)))))))).	469	498	1	-20.6	1	0.024814	0.618	0.603583	0.409563	-12.408	18	29	9	3UTR		1	1
hsa-miR-103a-3p	NM_152621	SGMS2	.((((((((((((((((((((..&.))))))))...))))).......))))))).	2478	2520	1	-24.5	1	0.000360524	0.5	-0.446199	-0.0657006	-3.79332	20	32	8	3UTR		1	1
hsa-miR-103a-3p	NM_152695	ZNF449	((((((((((((((.(((((((.&))))))).)..)))))...)))))))).	2712	2740	1	-19.8	1	0.00287618	0.647	0.114091	0.573393	-4.67302	21	28	8	3UTR	MIRT229345	1	1
hsa-miR-103a-3p	NM_153029	N4BP1	.(((((((((((.(((((.....&))))).)))......)))))))).	6532	6556	1	-22.9	1	0.000438619	0.397	4.53979	3.88699	-5.08246	16	24	8	3UTR	MIRT027038	1	1
hsa-miR-103a-3p	NM_153050	MTMR3	..(((((.(((((((((((((..&)))))))))))))))).)).	5380	5400	1	-21.7	1	2.15e-08	0.426	1.64924	0.244217	-7.27064	18	20	16	3UTR	MIRT300994	1	1
hsa-miR-103a-3p	NM_153051	MTMR3	..(((((.(((((((((((((..&)))))))))))))))).)).	5353	5373	1	-21.7	1	2.15e-08	0.426	0.532825	0.295415	-7.27064	18	20	16	3UTR	MIRT300994	1	1
hsa-miR-103a-3p	NM_153226	SLC35G1	.(((.(.(((((.(((((((.((&))))))))))))))).))).	3308	3328	1	-19.2	1	1.8e-06	0.618	0.359817	0.981488	-10.7452	18	20	15	3UTR		1	1
hsa-miR-103a-3p	NM_153645	NUP50	.(((((((((((((((((.....&.))))))).)))).)))))).	3247	3288	1	-23.2	1	0.000509208	0.5	0	0	-3.79332	17	21	7	3UTR	MIRT027131	1	1
hsa-miR-103a-3p	NM_170721	MSI2	(.((((((.(.(((((((..(((&)))..)))))))).)))))).).	1702	1725	1	-20.1	1	0.000564736	0.471	-0.206252	0.541767	-8.98241	18	23	8	3UTR		1	1
hsa-miR-103a-3p	NM_170721	MSI2	((((((.((.(((...((((((.&))))))...))).)))))))).	798	820	1	-19.4	1	0.000489085	0.5	2.17843	2.5702	-8.54911	17	22	8	3UTR		1	1
hsa-miR-103a-3p	NM_172169	CAMK2G	.....((((((((((((((((((&)))))))))))).)))))).	3631	3651	1	-22.5	1	0.0840358	0.706	1.04196	1.05479	-13.6656	18	20	12	3UTR		1	1
hsa-miR-103a-3p	NM_172171	CAMK2G	.....((((((((((((((((((&)))))))))))).)))))).	3718	3738	1	-22.5	1	0.0840358	0.706	1.04196	1.07236	-13.6656	18	20	12	3UTR		1	1
hsa-miR-103a-3p	NM_172206	CAMKK1	.(.((((((.(((.(((((....&)))))..))).))))))).	3338	3357	1	-21.1	1	3.79e-05	0.412	1.42999	0.91247	-7.45021	15	19	7	3UTR		1	1
hsa-miR-103a-3p	NM_173199	NR4A3	.((((((((((.(((((.(((..&.))).))))))))))))))).	2135	2182	1	-27.4	1	0.00647642	0.544	0.984741	0.803645	-7.14013	18	21	15	3UTR		1	1
hsa-miR-103a-3p	NM_173475	DCUN1D3	.(((((((((((((((((...((&))...)))))))))...............)))))))).	1288	1326	1	-21.7	1	0.0193862	0.647	-0.0015477	0.222697	-3.79332	19	38	9	3UTR		1	1
hsa-miR-103a-3p	NM_173475	DCUN1D3	((((((((((((((((.((....&)).))))))).......))))))))).	1628	1655	1	-20.3	1	8.51e-05	0.647	0.374894	0.213383	-3.93757	18	27	9	3UTR		1	1
hsa-miR-103a-3p	NM_173566	PRR14L	((((.(((((((((((((((...&)))))..)).)))))))))))).	10502	10525	1	-20.9	1	0.000262583	0.471	1.50791	1.73657	-8.05661	19	23	12	3UTR	MIRT506032	1	1
hsa-miR-103a-3p	NM_174908	CCDC50	.(((((((((.(((((((.....&)))))))))))))))).	5400	5417	1	-25.9	1	0.000179276	0.574	0.620911	0.126343	-6.6181	16	17	16	3UTR		1	1
hsa-miR-103a-3p	NM_178335	CCDC50	.(((((((((.(((((((.....&)))))))))))))))).	5928	5945	1	-25.9	1	0.000179276	0.574	0.620911	0.126343	-6.6181	16	17	16	3UTR		1	1
hsa-miR-103a-3p	NM_181504	PIK3R1	(((((((((.(...((((.....&.))))).))))))))).	5139	5173	1	-21.9	1	0.000625605	0.662	2.87724	1.27324	-10.6729	14	17	9	3UTR	MIRT314097	1	1
hsa-miR-103a-3p	NM_181524	PIK3R1	(((((((((.(...((((.....&.))))).))))))))).	5201	5235	1	-21.9	1	0.000625605	0.662	2.87724	1.27324	-10.6729	14	17	9	3UTR	MIRT314097	1	1
hsa-miR-103a-3p	NM_183004	EIF5	.((((((((((((..........&)))))))))))).	1828	1841	1	-20.1	1	0.0027814	0.574	1.5938	3.38977	-5.61866	12	13	12	3UTR		1	1
hsa-miR-103a-3p	NM_183416	KIF1B	((((((((..((((((((((((.&.)))))))))))))))))))).	4737	4771	1	-27.7	1	0.00958371	0.588	0.0490081	0.13744	-6.23647	20	22	20	3UTR		1	1
hsa-miR-103a-3p	NM_198279	BCLAF3	.((((((((.(((...((((...&)))).))).)))))))).	2178	2196	1	-19.4	1	0.000409135	0.75	0	0	-6.86117	15	18	8	3UTR		1	1
hsa-miR-103a-3p	NM_203417	RCAN1	.(((((((((.((((((......&))))))..))))))))).	832	850	1	-21.2	1	0.00129298	0.485	1.45672	0.312556	-6.6181	15	18	9	3UTR		1	1
hsa-miR-103a-3p	NM_206921	CEP85L	.((((.((.(((.((((((....&)))))).))).)))))).	1903	1921	1	-19.9	1	1.6e-05	0.618	-0.272491	0.291132	-8.0398	15	18	6	3UTR		1	1
hsa-miR-103a-3p	NM_207292	MBNL1	((((((((.((((((((((((((&))))))))))..)))).)))))))).	2689	2715	1	-23.6	1	0.0100648	0.647	4.82749	5.14596	-4.99396	22	26	10	3UTR		1	1
hsa-miR-103a-3p	NM_207293	MBNL1	((((((((.((((((((((((((&))))))))))..)))).)))))))).	2743	2769	1	-23.6	1	0.0100648	0.647	4.82749	5.14596	-4.99396	22	26	10	3UTR		1	1
hsa-miR-103a-3p	NM_207294	MBNL1	((((((((.((((((((((((((&))))))))))..)))).)))))))).	2485	2511	1	-23.6	1	0.0100648	0.647	4.82749	5.14596	-4.99396	22	26	10	3UTR		1	1
hsa-miR-103a-3p	NM_207295	MBNL1	((((((((.((((((((((((((&))))))))))..)))).)))))))).	2521	2547	1	-23.6	1	0.0100648	0.647	4.82749	5.14596	-4.99396	22	26	10	3UTR		1	1
hsa-miR-103a-3p	NM_207296	MBNL1	((((((((.((((((((((((((&))))))))))..)))).)))))))).	2599	2625	1	-23.6	1	0.0100648	0.647	4.82749	5.14596	-4.99396	22	26	10	3UTR		1	1
hsa-miR-103a-3p	NM_207297	MBNL1	((((((((.((((((((((((((&))))))))))..)))).)))))))).	2630	2656	1	-23.6	1	0.0100648	0.647	4.82749	5.14596	-4.99396	22	26	10	3UTR		1	1
hsa-miR-103a-3p	NM_207517	ADAMTSL3	.((((((.(((((((((((..((&.))..)))..))))))))..)))))).	6620	6666	1	-25.2	1	0.000189946	0.515	-0.366599	-0.240029	-6.10696	19	27	8	3UTR		1	1
hsa-miR-103a-3p	XM_005245364	GATAD2B	.((((((..((((((((((....&))))))))....))..)))))).	3087	3110	1	-23.1	1	0.000443766	0.485	0	0	-7.16335	16	23	8	3UTR		1	1
hsa-miR-103a-3p	XM_005261314	NUP50	.(((((((((((((((((.....&.))))))).)))).)))))).	3446	3487	1	-23.2	1	0.000509208	0.5	0	0	-3.79332	17	21	7	3UTR	MIRT027131	1	1
hsa-miR-103a-3p	XM_005265245	SNRK	(((((((.((((((((((((((.&))))))))).)))))))))))).	2832	2855	1	-28.8	1	0.00481564	0.544	0	0	-6.25121	21	23	12	3UTR		1	1
hsa-miR-103a-3p	XM_005265245	SNRK	.((((((((((((.((((((((.&)))))))))))))................))).)))).	3179	3217	1	-25.5	1	1.4e-05	0.485	0	0	-4.65016	20	38	13	3UTR		1	1
hsa-miR-103a-3p	XM_005267635	ARHGAP5	((((((.((((((..((((((..&)))))).....)))))).)))))).	5010	5035	1	-23.1	1	0.00199054	0.691	0	0	-7.07355	18	25	6	3UTR		1	1
hsa-miR-103a-3p	XM_005270205	CAMK2G	.((((((.(((...(((((....&)))))..))).)))))).	2307	2325	1	-21.6	1	0.000190212	0.471	0	0	-11.5997	14	18	6	3UTR		1	1
hsa-miR-103a-3p	XM_005270593	CC2D1B	.((((((((((.(((((.((...&.)).))))))))).)))))).	3061	3082	1	-22.8	1	0.00412857	0.441	0	0	-7.14013	17	21	9	3UTR		1	1
hsa-miR-103a-3p	XM_006717996	CAMK2G	.((((((.(((...(((((....&)))))..))).)))))).	2460	2478	1	-21.6	1	0.000190212	0.471	0	0	-11.5997	14	18	6	3UTR		1	1
hsa-miR-103a-3p	XM_011530010	HIC2	.(((...((((((((((((.(((&.)))))))))))))))...))).	5943	5982	1	-27	1	1.18e-06	0.338	0	0	-11.357	18	23	15	3UTR	MIRT205324	1	1
hsa-miR-103a-3p	XM_017021288	ARHGAP5	((((((.((((((..((((((..&)))))).....)))))).)))))).	5007	5032	1	-23.1	1	0.00199054	0.691	0	0	-7.07355	18	25	6	3UTR		1	1
hsa-miR-103a-3p	XM_017028283	RCAN1	.(((((((((.((((((......&))))))..))))))))).	1372	1390	1	-21.2	1	0.00129298	0.485	0	0	-6.6181	15	18	9	3UTR		1	1
hsa-miR-103a-3p	XM_017029563	PAK3	.(((((.((((..(((((.(((.&)))))))).)))).))))).	2956	2976	1	-19.4	1	0.0135559	0.603	0	0	-9.97295	17	20	8	3UTR		1	1
hsa-miR-103a-3p	XM_024448219	CAMK2G	.((((((.(((...(((((....&)))))..))).)))))).	2195	2213	1	-21.6	1	0.000190212	0.471	0	0	-11.5997	14	18	6	3UTR		1	1
hsa-miR-103a-3p	XM_024448822	RASSF8	((((.((.(((((((((.((((.&))))))))))))).)).)))).	1649	1671	1	-25.3	1	0.00235379	0.574	0	0	-10.3702	19	22	13	3UTR		1	1
hsa-miR-103a-3p	XM_024448822	RASSF8	.((((((.((((((.((.(((((&))))).)).)))))))))))).	1948	1970	1	-22.2	1	0.000483363	0.574	0	0	-6.84241	19	22	12	3UTR		1	1
hsa-miR-103a-3p	XM_024448822	RASSF8	(((((((((((.(((.(......&).)))))))))))))).	2999	3016	1	-21.2	1	0.0193448	0.647	0	0	-7.51743	15	17	14	3UTR		1	1
hsa-miR-103a-3p	XM_024451630	BCAT2	.(((((((....(((((...((.&))...)))))))))))).	1591	1609	1	-19.6	1	0.00156799	0.471	0	0	-12.2638	14	18	12	3UTR		1	1
hsa-miR-103a-3p	XM_024452402	MBNL3	.(((((((((.((((((((((..&)))))))))).....)))))).))).	5933	5959	1	-22.5	1	0.000244538	0.618	0	0	-6.6181	19	26	10	3UTR		1	1
hsa-miR-103a-3p	XM_024452402	MBNL3	.(((((((((((((((((.((((&)))).)))..))))..)))))))))).	4164	4191	1	-22	1	0.00428121	0.574	0	0	-3.79332	21	27	10	3UTR		1	1
hsa-miR-103a-3p	NM_014979	SV2C	..((((.((((((((((...((.&.))...)))))))))).)))).	8719	8751	1	-24.4	1	1.67e-06	0.426	0.13216	-0.482909	-6.50069	16	22	10	3UTR		1	1
hsa-miR-103a-3p	NM_015074	KIF1B	....((((((((((((((((((.&))))))))....)))))))))).	10468	10491	1	-24.8	1	0.000140716	0.603	5.55085	5.49939	-9.54656	18	23	10	3UTR		1	1
hsa-miR-103a-3p	NM_015088	TNRC6B	(((((((..(((((((((((((.&))))))))))).))..)))..)))).	15762	15788	1	-24.9	1	0.101823	0.588	0.236441	0.343578	-7.3076	20	26	11	3UTR	MIRT027125	1	1
hsa-miR-103a-3p	NM_015216	PPIP5K2	..((((((((.(((((((((...&)))))))....)).)))))))).	6288	6311	1	-21.8	1	4.8e-05	0.515	0.301409	-0.0498642	-7.78178	17	23	8	3UTR		1	1
hsa-miR-103a-3p	NM_015367	BCL2L13	.((((((((.(((((((......&)))))))..)))))))).	2391	2409	1	-21.4	1	0.0109907	0.544	2.12634	0.00934246	-5.03583	15	18	8	3UTR		1	1
hsa-miR-103a-3p	NM_015374	SUN2	.((((((((((((((((......&)))))).)))).)))))).	3870	3889	1	-21.7	1	0.0618247	0.574	0.377913	0.272749	-3.79332	16	19	6	3UTR	MIRT027033	1	1
hsa-miR-103a-3p	NM_015704	DESI1	(((((((((((((((((((.(((&))))))).).)))..))))))))))).	853	880	1	-25.5	1	0.000817737	0.5	-0.168854	-0.158323	-3.93757	22	27	11	3UTR	MIRT027140	1	1
hsa-miR-103a-3p	NM_016087	WNT16	.(((((.((((((((((......&.)))))))))).))).)).	1159	1205	1	-21.9	1	0.000275614	0.471	-1.04741	0.224408	-5.33701	15	19	10	3UTR		1	1
hsa-miR-103a-3p	NM_016289	CAB39	.(((((((((((((((((((.((&)).))))))))))...))))))))).	3284	3310	1	-22.6	1	0.00790616	0.544	-0.0972622	-0.0336261	-3.79332	21	26	10	3UTR	MIRT205547	1	1
hsa-miR-103a-3p	NM_016289	CAB39	.(((((((((.(((((((..(((&)))..)))))))....))))))))).	2761	2787	1	-22	1	0.016328	0.779	2.82999	1.83671	-6.6181	19	26	9	3UTR	MIRT205547	1	1
hsa-miR-103a-3p	NM_016436	PHF20	(((((((((((((((.(((....&))).))))))).....)))))))).	5781	5806	1	-22.4	1	0.0421107	0.632	2.70083	3.00997	-4.17062	18	25	8	3UTR		1	1
hsa-miR-103a-3p	NM_016472	GSKIP	((((((((.((((((........&.)))))).)))))))).	1659	1691	1	-22.7	1	0.00560965	0.706	0.521215	1.22156	-5.22701	14	17	8	3UTR		1	1
hsa-miR-103a-3p	NM_017420	SIX4	...((((.((((((((((.....&)))))).)))))))).	5875	5891	1	-20.5	1	0.000374959	0.515	4.16001	3.28441	-8.82818	14	16	8	3UTR		1	1
hsa-miR-103a-3p	NM_017629	AGO4	.((((((((((((.(((((((..&))))).)).......)))))))))))).	5529	5557	1	-21	1	0.000625723	0.691	1.04282	1.29233	-4.65016	19	28	12	3UTR		1	1
hsa-miR-103a-3p	NM_017719	SNRK	(((((((.((((((((((((((.&))))))))).)))))))))))).	2754	2777	1	-28.8	1	0.00481564	0.544	4.304	1.66586	-6.25121	21	23	12	3UTR		1	1
hsa-miR-103a-3p	NM_017719	SNRK	.((((((((((((.((((((((.&)))))))))))))................))).)))).	3101	3139	1	-25.5	1	1.4e-05	0.485	0.862122	0.97152	-4.65016	20	38	13	3UTR		1	1
hsa-miR-103a-3p	NM_017811	UBE2R2	..(((((((((...(((((.((.&)).)))))...))))))))).	3340	3361	1	-22	1	0.0056773	0.471	-0.465401	-0.0971202	-10.4498	16	21	9	3UTR	MIRT027175	1	1
hsa-miR-103a-3p	NM_018388	MBNL3	.(((((((((.((((((((((..&)))))))))).....)))))).))).	5157	5183	1	-22.5	1	0.000244538	0.618	0	0	-6.6181	19	26	10	3UTR		1	1
hsa-miR-103a-3p	NM_018388	MBNL3	.(((((((((((((((((.((((&.)))).)))..))))..)))))))))).	3370	3415	1	-22.2	1	0.00428121	0.574	0	0	-3.79332	21	28	10	3UTR		1	1
hsa-miR-103a-3p	NM_018413	CHST11	.((((((..((((((((......&))))))))..)))))).	5588	5605	1	-23	1	0.00357762	0.574	2.54586	2.52123	-7.16335	14	17	8	3UTR		1	1
hsa-miR-103a-3p	NM_018416	FOXJ2	.((((((((...(((((((....&.)))).)))...)))))))).	2986	3013	1	-23.7	1	0.00408633	0.515	2.60659	1.67788	-11.2074	15	21	8	3UTR		1	1
hsa-miR-103a-3p	NM_018638	ETNK1	..((((.(((((((((((.....&)))).))))))).)))).	2763	2781	1	-21.6	1	0.00212121	0.588	2.821	1.28596	-6.50069	15	18	7	3UTR		1	1
hsa-miR-103a-3p	NM_020354	ENTPD7	.((((((((.....((((((((.&))))))))..)))))))).	2059	2078	1	-20.8	1	0.000299483	0.574	0.691563	0.384975	-13.3534	16	19	8	3UTR		1	1
hsa-miR-103a-3p	NM_020699	GATAD2B	.((((((..((((((((((....&))))))))....))..)))))).	3233	3256	1	-23.1	1	0.000443766	0.485	1.56763	1.96533	-7.16335	16	23	8	3UTR		1	1
hsa-miR-103a-3p	NM_021038	MBNL1	((((((((.((((((((((((((&))))))))))..)))).)))))))).	2725	2751	1	-23.6	1	0.0100648	0.647	4.82749	5.14596	-4.99396	22	26	10	3UTR		1	1
hsa-miR-103a-3p	NM_021090	MTMR3	..(((((.(((((((((((((..&)))))))))))))))).)).	5464	5484	1	-21.7	1	2.15e-08	0.426	0.532825	0.295415	-7.27064	18	20	16	3UTR	MIRT300994	1	1
hsa-miR-103a-3p	NM_023929	ZBTB10	.((((((((.(..((((.((((.&)))).))))..).)))))))).	3138	3160	1	-19.5	1	0.0160462	0.618	0.845017	3.11053	-9.67177	17	22	8	3UTR	MIRT552645	1	1
hsa-miR-103a-3p	NM_024423	DSC3	.((((((((....((((((....&))))))..)))))))).	3526	3543	1	-20.3	1	0.000495352	0.574	0.112081	-0.228574	-12.4965	14	17	8	3UTR		1	1
hsa-miR-103a-3p	NM_024751	GSTCD	((((((((((...((((......&))))....)))))))))).	3450	3469	1	-19.5	1	0.163977	0.721	0.206023	0.0218283	-11.3983	14	19	10	3UTR		1	1
hsa-miR-103a-3p	NM_002518	NPAS2	.((((((((.((((((((((...&.)))))))....)))..)))))))).	3657	3703	1	-24.5	1	0.00378686	0.544	0.46424	0.888496	-5.03583	18	26	8	3UTR		1	1
hsa-miR-103a-3p	NM_002569	FURIN	..(((((((.(((((((((((((&)))))))).............))))).))))))).	4089	4124	1	-22.5	1	0.000558327	0.485	1.5917	1.65906	-6.19951	20	35	8	3UTR	MIRT027060	1	1
hsa-miR-103a-3p	NM_002572	PAFAH1B2	(((((((.((((((((((((((.&))))).))))))))).))))))).	1732	1756	1	-20.7	1	0.00631131	0.603	1.20047	0.535539	-6.25121	21	24	9	3UTR	MIRT179009	1	1
hsa-miR-103a-3p	NM_002572	PAFAH1B2	.((.(((.(((((.(((((((..&)))).))))))))))).)).	1499	1519	1	-19.5	1	0.000105259	0.5	1.47415	0.555756	-9.99582	17	20	11	3UTR	MIRT179009	1	1
hsa-miR-103a-3p	NM_002578	PAK3	((((((((((((((((((((...&)))))..))))))))))......))))).	8427	8456	1	-19.8	1	0.00875763	0.529	0.332351	0.616631	-3.93757	20	29	10	3UTR		1	1
hsa-miR-103a-3p	NM_002578	PAK3	.(((((.((((..(((((.(((.&)))))))).)))).))))).	2804	2824	1	-19.4	1	0.0135559	0.603	1.76446	1.38745	-9.97295	17	20	8	3UTR		1	1
hsa-miR-103a-3p	NM_002612	PDK4	((((((((.(((.((((((.((.&)).))).))).))).)))))))).	2124	2148	1	-22.4	1	0.0345074	0.647	1.46114	2.19411	-6.28309	19	24	8	3UTR	MIRT027229	1	1
hsa-miR-103a-3p	NM_002612	PDK4	((((.(((..(((.(((((((.(&).))))))).)))..))).)))).	3069	3093	1	-19.4	1	0.00105443	0.603	3.96911	3.67264	-11.2123	18	24	7	3UTR	MIRT027229	1	1
hsa-miR-103a-3p	NM_002688	SEPTIN5	.(((((((((..(((((......&.)))))...))))))))).	1540	1571	1	-23.3	1	0.00193896	0.368	-0.522906	-0.430686	-9.9649	14	19	9	3UTR		1	1
hsa-miR-103a-3p	NM_002830	PTPN4	(((((((((((((((((.(((((&))))).)).))))))...))))))))).	3305	3333	1	-21.9	1	0.0061723	0.618	2.3469	1.52461	-3.93757	22	28	9	3UTR		1	1
hsa-miR-103a-3p	NM_002943	RORA	.((((((.(((.((((((((...&))))))))))))))))).	7925	7943	1	-20.5	1	0.00126353	0.662	1.46383	0.378194	-9.45376	17	18	17	3UTR		1	1
hsa-miR-103a-3p	NM_002968	SALL1	(((((((((((.(((.(((((..&))).)).))).......))))))))))).	4783	4812	1	-20.3	1	0.00759643	0.603	2.83834	3.56812	-7.51743	19	29	11	3UTR	MIRT027034	1	1
hsa-miR-103a-3p	NM_003483	HMGA2	(((((((..(.((((..((((((&))))))..)))).)..))))))).	3760	3784	1	-21.2	1	0.010127	0.603	3.32487	5.04233	-10.3654	18	24	7	3UTR		1	1
hsa-miR-103a-3p	NM_003632	CNTNAP1	.(((((((.(((((((((.....&.))))))))).))))))).	5330	5382	1	-26.8	1	0.0012843	0.485	3.35793	1.09417	-4.84971	16	19	9	3UTR		1	1
hsa-miR-103a-3p	NM_003709	KLF7	((((((((((((((((.......&))))....)))))))))))).	4769	4790	1	-21.1	1	0.0995533	0.515	2.41143	2.79127	-3.93757	16	21	12	3UTR		1	1
hsa-miR-103a-3p	NM_003761	VAMP8	.(((((((.((((((((((....&))))))).))).))))))).	493	513	1	-24.5	1	0.0046072	0.368	0.383338	0.27957	-4.84971	17	20	7	3UTR		1	1
hsa-miR-103a-3p	NM_003795	SNX3	(((((((......((((((((..&))))))))....))))))).	815	835	1	-17.6	1	0.0120795	0.632	1.55349	1.86623	-16.0108	15	20	8	3UTR		1	1
hsa-miR-103a-3p	NM_003913	PRPF4B	(.((((((((.((((((((((((&))))))))..............))))...)))))))).).	4442	4482	1	-19.4	1	0.00724296	0.676	4.0029	3.58912	-7.92602	21	40	8	3UTR		1	1
hsa-miR-103a-3p	NM_004235	KLF4	((((.((((((...(((((((..&)))))))..)))))).)))).	2505	2526	1	-19.6	1	0.000477419	0.632	1.12876	1.16755	-13.5494	17	21	7	3UTR	MIRT006688	1	1
hsa-miR-103a-3p	NM_004414	RCAN1	.(((((((((.((((((......&))))))..))))))))).	1017	1035	1	-21.2	1	0.00129298	0.485	0.0140752	-0.0486177	-6.6181	15	18	9	3UTR		1	1
hsa-miR-103a-3p	NM_004522	KIF5C	.((((((((...(((.(((.(((&)))..))).)))..)))))))).	4026	4049	1	-21.9	1	0.00193079	0.574	0	0	-11.4405	17	23	8	3UTR		1	1
hsa-miR-103a-3p	NM_004798	KIF3B	.(((((...(((((((((.(((.&.))))))))))))...))))).	4878	4915	1	-24.6	1	0.00294289	0.529	0.252189	0.522559	-8.70704	17	22	12	3UTR		1	1
hsa-miR-103a-3p	NM_004984	KIF5A	((((((((((.((((((((..((&))..)))..)))))))))).))))).	4142	4168	1	-21.8	1	5.13e-05	0.412	-0.122874	-0.0550304	-6.76235	20	26	10	3UTR	MIRT027231	1	1
hsa-miR-103a-3p	NM_005158	ABL2	.(((((((((((((.((((....&.))))))))))))))))).	7522	7547	1	-23.5	1	1.86e-05	0.485	0.593001	0.247858	-4.52877	17	19	17	3UTR	MIRT027023	1	1
hsa-miR-103a-3p	NM_005158	ABL2	(((((((((((((((((((....&))))))....))))))))))))).	5335	5359	1	-23.6	1	0.0164272	0.632	0.701202	0.666383	-3.93757	19	24	13	3UTR	MIRT027023	1	1
hsa-miR-103a-3p	NM_005288	GPR12	(((.(((..((((((((......&))))))))..)))..))).	3455	3474	1	-20.1	1	0.0263218	0.485	0	0	-10.3396	14	19	8	3UTR		1	1
hsa-miR-103a-3p	NM_005596	NFIB	(((.((((((((((.((((((((&)))))))).)))))))).)).))).	3496	3521	1	-26.6	1	0.00237096	0.676	0.501973	0.305661	-7.70505	21	25	8	3UTR		1	1
hsa-miR-103a-3p	NM_005708	GPC6	((((((((...((((((((....&.))))))....))...)))))))).	3562	3592	1	-19.5	1	0.00310888	0.559	4.18187	3.49956	-9.06125	16	25	8	3UTR		1	1
hsa-miR-103a-3p	NM_005840	SPRY3	.(((((((((((((((((((.((&)).)))))))))..)))))....))))).	2988	3017	1	-21.3	1	1.6e-05	0.529	0	0	-3.79332	21	29	9	3UTR		1	1
hsa-miR-103a-3p	NM_006136	CAPZA2	((((((((((.((...(((.((.&)).)))...)).)))))))))).	1473	1496	1	-18	1	0.0105108	0.75	2.41949	2.76786	-8.58769	17	23	10	3UTR	MIRT027222	1	1
hsa-miR-103a-3p	NM_006203	PDE4D	(((((.(((((((((.((.....&)).)))))))))))))).	4905	4923	1	-21.9	1	0.0156975	0.544	4.56131	3.03197	-6.07158	16	18	14	3UTR	MIRT027087	1	1
hsa-miR-103a-3p	NM_006260	DNAJC3	.(((((((((...((.(((((((&))))))).))..))))))))).	2919	2941	1	-19.9	1	0.003947	0.691	0.524033	0.640813	-11.4871	18	22	9	3UTR		1	1
hsa-miR-103a-3p	NM_006288	THY1	....(((((.((((((((((((.&))))))))))....)).))))).	2082	2105	1	-24.1	1	0.00301001	0.426	-0.343094	-0.140906	-10.7891	17	23	10	3UTR		1	1
hsa-miR-103a-3p	NM_006288	THY1	.(((((.((.(((((((((....&.))))))))).))))))).	3595	3619	1	-22.9	1	1.19e-05	0.456	0.027656	0.229201	-6.57952	16	19	9	3UTR		1	1
hsa-miR-103a-3p	NM_006321	ARIH2	...(((((((.((((((((((((&)))))))))))).))))))).	3164	3185	1	-22.4	1	0.00158219	0.515	0.487986	0.42729	-9.33931	19	21	12	3UTR		1	1
hsa-miR-103a-3p	NM_006321	ARIH2	.((..(((((((((.(((((...&)))))))))))))).)).	2369	2387	1	-21.9	1	7.56e-07	0.426	0.0390324	0.252749	-11.6798	16	18	14	3UTR		1	1
hsa-miR-103a-3p	NM_006763	BTG2	(((((((((.((((((.((.(((&))).)).))))))))))))))).	1186	1209	1	-25	1	0.0305886	0.544	0.675398	0.649706	-5.18008	20	23	15	3UTR		1	1
hsa-miR-103a-3p	NM_007067	KAT7	.((((.(((((((((((((((.(&).))))))))))).)))))))).	5491	5514	1	-21.7	1	0.0500778	0.529	0.222408	-0.221753	-5.69428	20	23	11	3UTR		1	1
hsa-miR-103a-3p	NM_007222	ZHX1	(((((((.(((((((((((....&)))))))....))))))))))).	4339	4362	1	-23.3	1	0.00423685	0.765	2.33456	1.87292	-6.25121	18	23	11	3UTR	MIRT027040	1	1
hsa-miR-103a-3p	NM_007314	ABL2	.(((((((((((((.((((....&.))))))))))))))))).	7815	7840	1	-23.5	1	1.86e-05	0.485	-0.0154553	0.458392	-4.52877	17	19	17	3UTR	MIRT027023	1	1
hsa-miR-103a-3p	NM_007314	ABL2	(((((((((((((((((((....&))))))....))))))))))))).	5628	5652	1	-23.6	1	0.0164272	0.632	0.384796	0.752477	-3.93757	19	24	13	3UTR	MIRT027023	1	1
hsa-miR-103a-3p	NM_012199	AGO1	(((((((((..((((((......&))))))..))))))))).	12720	12738	1	-25.4	1	0.0040005	0.559	0.259269	0.344475	-8.00486	15	18	9	3UTR	MIRT249123	1	1
hsa-miR-103a-3p	NM_012199	AGO1	..((((.((((.(((((((((..&)))))))))...))))..)))).	3144	3167	1	-23.3	1	0.000163272	0.544	1.51615	2.63341	-9.84749	17	23	9	3UTR	MIRT249123	1	1
hsa-miR-103a-3p	NM_012290	TLK1	.((((((.((((.((.(((....&))).)).)))))))))).	4679	4697	1	-18.9	1	0.000380337	0.632	5.93634	4.61794	-7.62914	15	18	10	3UTR	MIRT027139	1	1
hsa-miR-103a-3p	NM_012297	G3BP2	..((((((((.(((((.......&))))))))))))).	1966	1980	1	-18.5	1	0.00108125	0.647	1.26568	2.46996	-7.78178	13	14	13	3UTR	MIRT027093	1	1
hsa-miR-103a-3p	NM_014001	GGA3	.((((((((((.((((((.(((.&)))))))))...)))))))).)).	2172	2196	1	-24.9	1	0.000735292	0.412	0.640442	1.43757	-7.14013	19	24	9	3UTR	MIRT027133	1	1
hsa-miR-103a-3p	NM_014117	C16orf72	..((((...((((((((..((..&.))..))))))))..)))).	3579	3604	1	-19.6	1	0.00113226	0.574	0.291836	0.594698	-9.87071	14	20	8	3UTR	MIRT027223	1	1
hsa-miR-103a-3p	NM_014392	NSG1	((((((((((((((((((.....&))).))))..)).))))))))).	771	794	1	-20.5	1	0.00221014	0.559	3.26821	1.81974	-3.93757	18	23	9	3UTR		1	1
hsa-miR-103a-3p	NM_014423	AFF4	....((((((((((((((.....&)))))))))))))).	9464	9479	1	-22.1	1	0.0105311	0.676	1.09572	0.925893	-9.54656	14	15	14	3UTR		1	1
hsa-miR-103a-3p	NM_001323324	MAPK8	.((((((((....((((((....&))))))....)))))))).	4692	4711	1	-21.3	1	0.050946	0.559	0.219136	0.420331	-12.4965	14	19	8	3UTR		1	1
hsa-miR-103a-3p	NM_001323329	MAPK8	.((((((((....((((((....&))))))....)))))))).	4687	4706	1	-21.3	1	0.050946	0.559	0.219136	0.420331	-12.4965	14	19	8	3UTR		1	1
hsa-miR-103a-3p	NM_001324328	PAK3	((((((((((((((((((((...&)))))..))))))))))......))))).	8257	8286	1	-19.8	1	0.00875763	0.529	0.332351	0.616631	-3.93757	20	29	10	3UTR		1	1
hsa-miR-103a-3p	NM_001324328	PAK3	.(((((.((((..(((((.(((.&)))))))).)))).))))).	2634	2654	1	-19.4	1	0.0135559	0.603	1.76446	1.38745	-9.97295	17	20	8	3UTR		1	1
hsa-miR-103a-3p	NM_001324329	PAK3	((((((((((((((((((((...&)))))..))))))))))......))))).	8472	8501	1	-19.8	1	0.00875763	0.529	0.332351	0.616631	-3.93757	20	29	10	3UTR		1	1
hsa-miR-103a-3p	NM_001324329	PAK3	.(((((.((((..(((((.(((.&)))))))).)))).))))).	2849	2869	1	-19.4	1	0.0135559	0.603	1.76446	1.38745	-9.97295	17	20	8	3UTR		1	1
hsa-miR-103a-3p	NM_001330129	NDEL1	.((((((..((...((((((((.&))))))))..))..)))))).	1377	1398	1	-24.2	1	0.0279543	0.529	0.799606	1.35144	-12.6561	16	21	8	3UTR	MIRT027032	1	1
hsa-miR-103a-3p	NM_001330585	CC2D1B	(((((((((((((((((((.(((&)))..)))))).)))))......)))))))).	2782	2814	1	-26	1	0.00601861	0.529	3.6212	4.38865	-3.93757	22	32	8	3UTR		1	1
hsa-miR-103a-3p	NM_001330750	SNRK	(((((((.((((((((((((((.&))))))))).)))))))))))).	1997	2020	1	-28.8	1	0.00481564	0.544	1.5012	2.31921	-6.25121	21	23	12	3UTR		1	1
hsa-miR-103a-3p	NM_001349242	PDE4D	(((((.(((((((((.((.....&)).)))))))))))))).	5275	5293	1	-21.9	1	0.0156975	0.544	0.941648	0.718267	-6.07158	16	18	14	3UTR	MIRT027087	1	1
hsa-miR-103a-3p	NM_001349337	FOXP1	((((((...((((((((((....&.))))))))))..............)))))).	4499	4542	1	-24.7	1	0.00146904	0.544	2.6351	2.66705	-8.85129	16	32	10	3UTR		1	1
hsa-miR-103a-3p	NM_001349338	FOXP1	((((((...((((((((((....&.))))))))))..............)))))).	5197	5240	1	-24.7	1	0.00146904	0.544	6.23442	6.07057	-8.85129	16	32	10	3UTR		1	1
hsa-miR-103a-3p	NM_001349340	FOXP1	((((((...((((((((((....&.))))))))))..............)))))).	5102	5145	1	-24.7	1	0.00146904	0.544	6.62762	6.40497	-8.85129	16	32	10	3UTR		1	1
hsa-miR-103a-3p	NM_001349341	FOXP1	((((((...((((((((((....&.))))))))))..............)))))).	5194	5237	1	-24.7	1	0.00146904	0.544	6.38567	6.06742	-8.85129	16	32	10	3UTR		1	1
hsa-miR-103a-3p	NM_001349342	FOXP1	((((((...((((((((((....&.))))))))))..............)))))).	4520	4563	1	-24.7	1	0.00146904	0.544	0.617663	3.23025	-8.85129	16	32	10	3UTR		1	1
hsa-miR-103a-3p	NM_001349343	FOXP1	((((((...((((((((((....&.))))))))))..............)))))).	4517	4560	1	-24.7	1	0.00146904	0.544	1.2498	2.96966	-8.85129	16	32	10	3UTR		1	1
hsa-miR-103a-3p	NM_001349344	FOXP1	((((((...((((((((((....&.))))))))))..............)))))).	4409	4452	1	-24.7	1	0.00146904	0.544	3.57658	4.43063	-8.85129	16	32	10	3UTR		1	1
hsa-miR-103a-3p	NM_001354705	KIF5A	((((((((((.((((((((..((&))..)))..)))))))))).))))).	3875	3901	1	-21.8	1	5.13e-05	0.412	-0.122874	-0.0550304	-6.76235	20	26	10	3UTR	MIRT027231	1	1
hsa-miR-103a-3p	NM_001354943	CUL4A	....((((.((.(((((((.(((&.))).)))))))..)).)))).	753	803	1	-21.6	1	0.00215876	0.353	-0.837911	-0.299233	-13.9498	16	22	7	3UTR	MIRT027107	1	1
hsa-miR-103a-3p	NM_001361665	FGF2	..(((((((((((((((((....&))))))))))))..))))).	1307	1327	1	-20.8	1	0.000269064	0.632	2.88236	2.50079	-4.957	17	20	12	3UTR	MIRT027141	1	1
hsa-miR-103a-3p	NM_001365951	KIF1B	....((((((((((((((((((.&))))))))....)))))))))).	10742	10765	1	-24.8	1	0.000140716	0.603	5.55085	5.49939	-9.54656	18	23	10	3UTR		1	1
hsa-miR-103a-3p	NM_001365952	KIF1B	....((((((((((((((((((.&))))))))....)))))))))).	10556	10579	1	-24.8	1	0.000140716	0.603	5.55085	5.49939	-9.54656	18	23	10	3UTR		1	1
hsa-miR-103a-3p	NM_001365953	KIF1B	((((((((..((((((((((((.&.)))))))))))))))))))).	4662	4696	1	-27.7	1	0.00958371	0.588	0.0490081	0.13744	-6.23647	20	22	20	3UTR		1	1
hsa-miR-103a-3p	NM_001367531	CAMK2G	.....((((((((((((((((((&)))))))))))).)))))).	3637	3657	1	-22.5	1	0.0840358	0.706	1.04196	1.05479	-13.6656	18	20	12	3UTR		1	1
hsa-miR-103a-3p	NM_001367542	CAMK2G	.....((((((((((((((((((&)))))))))))).)))))).	3915	3935	1	-22.5	1	0.0840358	0.706	1.04196	1.05479	-13.6656	18	20	12	3UTR		1	1
hsa-miR-103a-3p	NM_001367774	BCLAF3	.((((((((.(((...((((...&)))).))).)))))))).	2265	2283	1	-19.4	1	0.000409135	0.75	0.440552	0.247822	-6.86117	15	18	8	3UTR		1	1
hsa-miR-103a-3p	NM_001369460	NFIB	(((.((((((((((.((((((((&)))))))).)))))))).)).))).	3716	3741	1	-26.6	1	0.00237096	0.676	1.05134	0.85481	-7.70505	21	25	8	3UTR		1	1
hsa-miR-103a-3p	NM_001369464	NFIB	(((.((((((((((.((((((((&)))))))).)))))))).)).))).	3680	3705	1	-26.6	1	0.00237096	0.676	0.685094	0.872795	-7.70505	21	25	8	3UTR		1	1
hsa-miR-103a-3p	NM_001369466	NFIB	(((.((((((((((.((((((((&)))))))).)))))))).)).))).	3467	3492	1	-26.6	1	0.00237096	0.676	0.38861	0.595823	-7.70505	21	25	8	3UTR		1	1
hsa-miR-103a-3p	NM_001369467	NFIB	(((.((((((((((.((((((((&)))))))).)))))))).)).))).	3136	3161	1	-26.6	1	0.00237096	0.676	1.82909	0.867611	-7.70505	21	25	8	3UTR		1	1
hsa-miR-103a-3p	NM_001369470	NFIB	(((.((((((((((.((((((((&)))))))).)))))))).)).))).	3402	3427	1	-26.6	1	0.00237096	0.676	1.2083	0.869523	-7.70505	21	25	8	3UTR		1	1
hsa-miR-103a-3p	NM_001369472	NFIB	(((.((((((((((.((((((((&)))))))).)))))))).)).))).	3378	3403	1	-26.6	1	0.00237096	0.676	1.09494	0.973582	-7.70505	21	25	8	3UTR		1	1
hsa-miR-103a-3p	NM_001369476	NFIB	(((.((((((((((.((((((((&)))))))).)))))))).)).))).	3047	3072	1	-26.6	1	0.00237096	0.676	2.63739	0.988756	-7.70505	21	25	8	3UTR		1	1
hsa-miR-103a-3p	NM_001369479	NFIB	(((.((((((((((.((((((((&)))))))).)))))))).)).))).	2567	2592	1	-26.6	1	0.00237096	0.676	5.70894	3.66616	-7.70505	21	25	8	3UTR		1	1
hsa-miR-103a-3p	NM_001370181	GSTCD	((((((((((...((((......&))))....)))))))))).	3711	3730	1	-19.5	1	0.163977	0.721	0.206023	0.0218283	-11.3983	14	19	10	3UTR		1	1
hsa-miR-103a-3p	NM_001370208	FBXL20	.((((((((...(((((......&))))).)))))))).	10073	10088	1	-20.7	1	0.0010273	0.426	1.73152	2.73139	-11.2074	13	15	8	3UTR		1	1
hsa-miR-103a-3p	NM_001370548	FOXP1	((((((...((((((((((....&.))))))))))..............)))))).	4499	4542	1	-24.7	1	0.00146904	0.544	2.6351	2.66705	-8.85129	16	32	10	3UTR		1	1
hsa-miR-103a-3p	NM_001372050	THY1	.((((....(((((((((((((.&)))))))))).)))......)))).	1280	1305	1	-24.3	1	0.00147027	0.397	0.275119	-0.232332	-10.608	17	25	10	3UTR		1	1
hsa-miR-103a-3p	NM_001376820	MBNL1	((((((((.((((((((((((((&))))))))))..)))).)))))))).	2779	2805	1	-23.6	1	0.0100648	0.647	4.82749	5.14596	-4.99396	22	26	10	3UTR		1	1
hsa-miR-103a-3p	NM_001376833	MBNL1	((((((((.((((((((((((((&))))))))))..)))).)))))))).	2648	2674	1	-23.6	1	0.0100648	0.647	4.82749	5.14596	-4.99396	22	26	10	3UTR		1	1
hsa-miR-103a-3p	NM_001376836	MBNL1	((((((((.((((((((((((((&))))))))))..)))).)))))))).	2594	2620	1	-23.6	1	0.0100648	0.647	4.82749	5.14596	-4.99396	22	26	10	3UTR		1	1
hsa-miR-103a-3p	NM_001382228	NSG1	((((((((((((((((((.....&))).))))..)).))))))))).	654	677	1	-20.5	1	0.00221014	0.559	3.26821	1.81974	-3.93757	18	23	9	3UTR		1	1
hsa-miR-103a-3p	NM_001399	EDA	(((((.(((((((((((((....&.)))))))))))))))))).	2876	2911	1	-27.5	1	0.0521501	0.5	0.179456	0.241279	-5.83853	18	20	18	3UTR		1	1
hsa-miR-103a-3p	NM_001941	DSC3	.((((((((....((((((....&))))))..)))))))).	3483	3500	1	-20.3	1	0.000495352	0.574	-0.0128019	-0.155725	-12.4965	14	17	8	3UTR		1	1
hsa-miR-103a-3p	NM_001969	EIF5	.((((((((((((..........&)))))))))))).	1763	1776	1	-20.1	1	0.0027814	0.574	1.5938	3.38977	-5.61866	12	13	12	3UTR		1	1
hsa-miR-103a-3p	NM_001973	ELK4	(((.((((((((((((((.....&.))))))))))))))..))).	10115	10161	1	-23.8	1	0.00119137	0.618	0.699814	0.383509	-6.9696	17	21	14	3UTR	MIRT507433	1	1
hsa-miR-103a-3p	NM_001973	ELK4	..(((((((((..((((((((.(&).))))))))))))))))).	1762	1782	1	-20.7	1	0.000486861	0.662	0.540349	0.681875	-9.59293	18	20	17	3UTR	MIRT507433	1	1
hsa-miR-103a-3p	NM_002006	FGF2	..(((((((((((((((((....&))))))))))))..))))).	1430	1450	1	-20.8	1	0.000269064	0.632	2.88236	2.50079	-4.957	17	20	12	3UTR	MIRT027141	1	1
hsa-miR-103a-3p	NM_002009	FGF7	...((((((((...(((((....&)))))...)))))))).	2184	2201	1	-18.9	1	0.00186166	0.603	2.64896	2.26471	-12.0073	13	17	8	3UTR		1	1
hsa-miR-103a-3p	NM_000620	NOS1	.((.(((..(((((((((.(((.&))))))))))))..))).)).	11541	11562	1	-24.1	1	0.0161059	0.456	0.120289	-0.295957	-10.1954	17	21	12	3UTR		1	1
hsa-miR-103a-3p	NM_001001974	PLEKHA1	((((((((((.(((((((((((.&))))))))))))))))))))).	5566	5588	1	-26.8	1	0.00426064	0.574	-0.284235	-0.207367	-6.76235	21	22	21	3UTR	MIRT055813	1	1
hsa-miR-103a-3p	NM_001005609	EDA	(((((.(((((((((((((....&.)))))))))))))))))).	2870	2905	1	-27.5	1	0.0521501	0.5	0.179456	0.241279	-5.83853	18	20	18	3UTR		1	1
hsa-miR-103a-3p	NM_001005612	EDA	(((((.(((((((((((((....&.)))))))))))))))))).	2861	2896	1	-27.5	1	0.0521501	0.5	0.179456	0.241279	-5.83853	18	20	18	3UTR		1	1
hsa-miR-103a-3p	NM_001009939	SEPTIN5	.(((((((((..(((((......&.)))))...))))))))).	1765	1796	1	-23.3	1	0.00193896	0.368	-0.522906	-0.430686	-9.9649	14	19	9	3UTR		1	1
hsa-miR-103a-3p	NM_001012642	GRAMD2A	((((((((..(((((((......&)))))))....)))))))).	1152	1172	1	-23.8	1	0.000117936	0.544	-0.602555	0.094931	-6.23647	15	20	8	3UTR		1	1
hsa-miR-103a-3p	NM_001017926	ZHX1	(((((((.(((((((((((....&)))))))....))))))))))).	4434	4457	1	-23.3	1	0.00423685	0.765	2.81285	3.63566	-6.25121	18	23	11	3UTR	MIRT027040	1	1
hsa-miR-103a-3p	NM_001024843	TNRC6B	(((((((..(((((((((((((.&))))))))))).))..)))..)))).	13754	13780	1	-24.9	1	0.101823	0.588	0.322796	0.385785	-7.3076	20	26	11	3UTR	MIRT027125	1	1
hsa-miR-103a-3p	NM_001025579	NDEL1	.((((((..((...((((((((.&))))))))..))..)))))).	1564	1585	1	-24.2	1	0.0279543	0.529	0.799606	1.35144	-12.6561	16	21	8	3UTR	MIRT027032	1	1
hsa-miR-103a-3p	NM_001031720	GSTCD	((((((((((...((((......&))))....)))))))))).	3529	3548	1	-19.5	1	0.163977	0.721	0.206023	0.0218283	-11.3983	14	19	10	3UTR		1	1
hsa-miR-103a-3p	NM_001040101	NSG1	((((((((((((((((((.....&))).))))..)).))))))))).	811	834	1	-20.5	1	0.00221014	0.559	3.26821	1.81974	-3.93757	18	23	9	3UTR		1	1
hsa-miR-103a-3p	NM_001077199	SREK1	(((((((((((.(((........&)))))))))).)))).	2580	2596	1	-17.9	1	0.020847	0.632	3.1192	1.65742	-7.51743	14	16	10	3UTR	MIRT500956	1	1
hsa-miR-103a-3p	NM_001077710	FAM110C	(((((((((....(((((.((.(&.).)).)))))...))))))))).	2713	2766	1	-20	1	0.00332557	0.647	0.107676	-0.0911578	-12.6408	17	24	9	3UTR		1	1
hsa-miR-103a-3p	NM_001081550	THOC2	..(((((..((((((((((....&))))))))))))))).	5476	5492	1	-19	1	0.00128474	0.632	2.50582	2.91738	-8.32703	15	16	15	3UTR		1	1
hsa-miR-103a-3p	NM_001100594	SNRK	(((((((.((((((((((((((.&))))))))).)))))))))))).	2692	2715	1	-28.8	1	0.00481564	0.544	1.5012	2.31921	-6.25121	21	23	12	3UTR		1	1
hsa-miR-103a-3p	NM_001104631	PDE4D	(((((.(((((((((.((.....&)).)))))))))))))).	5288	5306	1	-21.9	1	0.0156975	0.544	0.612587	0.856377	-6.07158	16	18	14	3UTR	MIRT027087	1	1
hsa-miR-103a-3p	NM_001128166	PAK3	((((((((((((((((((((...&)))))..))))))))))......))))).	8182	8211	1	-19.8	1	0.00875763	0.529	0.832937	0.617913	-3.93757	20	29	10	3UTR		1	1
hsa-miR-103a-3p	NM_001128166	PAK3	.(((((.((((..(((((.(((.&)))))))).)))).))))).	2559	2579	1	-19.4	1	0.0135559	0.603	1.0695	1.09904	-9.97295	17	20	8	3UTR		1	1
hsa-miR-103a-3p	NM_001128167	PAK3	((((((((((((((((((((...&)))))..))))))))))......))))).	8109	8138	1	-19.8	1	0.00875763	0.529	0.832937	0.617913	-3.93757	20	29	10	3UTR		1	1
hsa-miR-103a-3p	NM_001128167	PAK3	.(((((.((((..(((((.(((.&)))))))).)))).))))).	2486	2506	1	-19.4	1	0.0135559	0.603	1.0695	1.09904	-9.97295	17	20	8	3UTR		1	1
hsa-miR-103a-3p	NM_001128168	PAK3	((((((((((((((((((((...&)))))..))))))))))......))))).	8538	8567	1	-19.8	1	0.00875763	0.529	0.332351	0.616631	-3.93757	20	29	10	3UTR		1	1
hsa-miR-103a-3p	NM_001128168	PAK3	.(((((.((((..(((((.(((.&)))))))).)))).))))).	2915	2935	1	-19.4	1	0.0135559	0.603	1.76446	1.38745	-9.97295	17	20	8	3UTR		1	1
hsa-miR-103a-3p	NM_001128172	PAK3	.(((((.((((..(((((.(((.&)))))))).)))).))))).	2317	2337	1	-19.4	1	0.0135559	0.603	0	0	-9.97295	17	20	8	3UTR		1	1
hsa-miR-103a-3p	NM_001130849	CAB39	.(((((((((((((((((((.((&)).))))))))))...))))))))).	3406	3432	1	-22.6	1	0.00790616	0.544	-0.0972622	-0.0336261	-3.79332	21	26	10	3UTR	MIRT205547	1	1
hsa-miR-103a-3p	NM_001130849	CAB39	.(((((((((.(((((((..(((&)))..)))))))....))))))))).	2883	2909	1	-22	1	0.016328	0.779	2.82999	1.83671	-6.6181	19	26	9	3UTR	MIRT205547	1	1
hsa-miR-103a-3p	NM_001130850	CAB39	.(((((((((((((((((((.((&)).))))))))))...))))))))).	3150	3176	1	-22.6	1	0.00790616	0.544	-0.0972622	-0.0336261	-3.79332	21	26	10	3UTR	MIRT205547	1	1
hsa-miR-103a-3p	NM_001130850	CAB39	.(((((((((.(((((((..(((&)))..)))))))....))))))))).	2627	2653	1	-22	1	0.016328	0.779	2.82999	1.83671	-6.6181	19	26	9	3UTR	MIRT205547	1	1
hsa-miR-103a-3p	NM_001134658	SLC35G1	.(((.(.(((((.(((((((.((&))))))))))))))).))).	3311	3331	1	-19.2	1	1.8e-06	0.618	0.359817	0.981488	-10.7452	18	20	15	3UTR		1	1
hsa-miR-103a-3p	NM_001135187	AGFG1	(((((((((((((((((((((((&))))))).........))))))))))))...................)))).	3791	3843	1	-22.8	1	0.00312232	0.662	0	0	-3.93757	23	52	12	3UTR	MIRT027233	1	1
hsa-miR-103a-3p	NM_001135188	AGFG1	(((((((((((((((((((((((&))))))).........))))))))))))...................)))).	3719	3771	1	-22.8	1	0.00312232	0.662	0	0	-3.93757	23	52	12	3UTR	MIRT027233	1	1
hsa-miR-103a-3p	NM_001136000	ABL2	(((((((((((((((((((....&))))))....))))))))))))).	5026	5050	1	-23.6	1	0.0164272	0.632	0.319819	0.317135	-3.93757	19	24	13	3UTR	MIRT027023	1	1
hsa-miR-103a-3p	NM_001136257	SGMS2	.((((((((((((((((((((..&.))))))))...))))).......))))))).	2202	2244	1	-24.5	1	0.000360524	0.5	-0.446199	-0.0657006	-3.79332	20	32	8	3UTR		1	1
hsa-miR-103a-3p	NM_001136258	SGMS2	.((((((((((((((((((((..&.))))))))...))))).......))))))).	2406	2448	1	-24.5	1	0.000360524	0.5	-0.446199	-0.0657006	-3.79332	20	32	8	3UTR		1	1
hsa-miR-103a-3p	NM_001136555	TLK1	.((((((.((((.((.(((....&))).)).)))))))))).	4016	4034	1	-18.9	1	0.000380337	0.632	5.1808	5.15238	-7.62914	15	18	10	3UTR	MIRT027139	1	1
hsa-miR-103a-3p	NM_001162501	TNRC6B	(((((((..(((((((((((((.&))))))))))).))..)))..)))).	16092	16118	1	-24.9	1	0.101823	0.588	0.236441	0.343578	-7.3076	20	26	11	3UTR	MIRT027125	1	1
hsa-miR-103a-3p	NM_001164746	RASSF8	((((.((.(((((((((.((((.&))))))))))))).)).)))).	1945	1967	1	-25.3	1	0.00235379	0.574	2.15384	1.15775	-10.3702	19	22	13	3UTR		1	1
hsa-miR-103a-3p	NM_001164746	RASSF8	.((((((.((((((.((.(((((&))))).)).)))))))))))).	2244	2266	1	-22.2	1	0.000483363	0.574	1.10865	0.407029	-6.84241	19	22	12	3UTR		1	1
hsa-miR-103a-3p	NM_001164747	RASSF8	((((.((.(((((((((.((((.&))))))))))))).)).)))).	1696	1718	1	-25.3	1	0.00235379	0.574	2.15384	1.15775	-10.3702	19	22	13	3UTR		1	1
hsa-miR-103a-3p	NM_001164747	RASSF8	.((((((.((((((.((.(((((&))))).)).)))))))))))).	1995	2017	1	-22.2	1	0.000483363	0.574	1.10865	0.407029	-6.84241	19	22	12	3UTR		1	1
hsa-miR-103a-3p	NM_001164748	RASSF8	((((.((.(((((((((.((((.&))))))))))))).)).)))).	1979	2001	1	-25.3	1	0.00235379	0.574	2.15384	1.15775	-10.3702	19	22	13	3UTR		1	1
hsa-miR-103a-3p	NM_001164748	RASSF8	.((((((.((((((.((.(((((&))))).)).)))))))))))).	2278	2300	1	-22.2	1	0.000483363	0.574	1.10865	0.407029	-6.84241	19	22	12	3UTR		1	1
hsa-miR-103a-3p	NM_001168236	ABL2	.(((((((((((((.((((....&.))))))))))))))))).	7752	7777	1	-23.5	1	1.86e-05	0.485	0.330735	-0.00699798	-4.52877	17	19	17	3UTR	MIRT027023	1	1
hsa-miR-103a-3p	NM_001168236	ABL2	(((((((((((((((((((....&))))))....))))))))))))).	5565	5589	1	-23.6	1	0.0164272	0.632	0.692726	0.27084	-3.93757	19	24	13	3UTR	MIRT027023	1	1
hsa-miR-103a-3p	NM_001168237	ABL2	.(((((((((((((.((((....&.))))))))))))))))).	7506	7531	1	-23.5	1	1.86e-05	0.485	0.0999415	0.365484	-4.52877	17	19	17	3UTR	MIRT027023	1	1
hsa-miR-103a-3p	NM_001168237	ABL2	(((((((((((((((((((....&))))))....))))))))))))).	5319	5343	1	-23.6	1	0.0164272	0.632	0.681427	0.617651	-3.93757	19	24	13	3UTR	MIRT027023	1	1
hsa-miR-103a-3p	NM_001168238	ABL2	.(((((((((((((.((((....&.))))))))))))))))).	7443	7468	1	-23.5	1	1.86e-05	0.485	0.461867	0.106366	-4.52877	17	19	17	3UTR	MIRT027023	1	1
hsa-miR-103a-3p	NM_001168238	ABL2	(((((((((((((((((((....&))))))....))))))))))))).	5256	5280	1	-23.6	1	0.0164272	0.632	0.650351	0.667196	-3.93757	19	24	13	3UTR	MIRT027023	1	1
hsa-miR-103a-3p	NM_001168239	ABL2	.(((((((((((((.((((....&.))))))))))))))))).	7150	7175	1	-23.5	1	1.86e-05	0.485	-0.739308	0.471177	-4.52877	17	19	17	3UTR	MIRT027023	1	1
hsa-miR-103a-3p	NM_001168239	ABL2	(((((((((((((((((((....&))))))....))))))))))))).	4963	4987	1	-23.6	1	0.0164272	0.632	0.260493	0.412976	-3.93757	19	24	13	3UTR	MIRT027023	1	1
hsa-miR-103a-3p	NM_001170701	MBNL3	.(((((((((((((((((.((((&.)))).)))..))))..)))))))))).	3240	3285	1	-22.2	1	0.00428121	0.574	1.81788	1.7108	-3.79332	21	28	10	3UTR		1	1
hsa-miR-103a-3p	NM_001170702	MBNL3	.(((((((((((((((((.((((&.)))).)))..))))..)))))))))).	3204	3249	1	-22.2	1	0.00428121	0.574	0.543819	0.979913	-3.79332	21	28	10	3UTR		1	1
hsa-miR-103a-3p	NM_001170704	MBNL3	.(((((((((((((((((.((((&.)))).)))..))))..)))))))))).	3474	3519	1	-22.2	1	0.00428121	0.574	1.2658	0.716389	-3.79332	21	28	10	3UTR		1	1
hsa-miR-103a-3p	NM_001170765	LCOR	.((((..(((((((((((((...&.)))))))))...))))..)))).	6846	6892	1	-22.6	1	0.0382473	0.618	0.801314	0.71778	-7.23797	17	24	9	3UTR	MIRT027215	1	1
hsa-miR-103a-3p	NM_001170766	LCOR	.((((..(((((((((((((...&.)))))))))...))))..)))).	4269	4315	1	-22.6	1	0.0382473	0.618	0.801314	0.71778	-7.23797	17	24	9	3UTR	MIRT027215	1	1
hsa-miR-103a-3p	NM_001171506	MCFD2	((((((((((((((.(((((...&.)))))))))).))))))))).	920	955	1	-23.5	1	0.00198062	0.588	-0.170868	0.163437	-4.67302	19	22	10	3UTR		1	1
hsa-miR-103a-3p	NM_001171507	MCFD2	((((((((((((((.(((((...&.)))))))))).))))))))).	812	847	1	-23.5	1	0.00198062	0.588	0.226558	0.274775	-4.67302	19	22	10	3UTR		1	1
hsa-miR-103a-3p	NM_001171508	MCFD2	((((((((((((((.(((((...&.)))))))))).))))))))).	964	999	1	-23.5	1	0.00198062	0.588	0.366826	0.379975	-4.67302	19	22	10	3UTR		1	1
hsa-miR-103a-3p	NM_001171509	MCFD2	((((((((((((((.(((((...&.)))))))))).))))))))).	609	644	1	-23.5	1	0.00198062	0.588	0.577226	0.580733	-4.67302	19	22	10	3UTR		1	1
hsa-miR-103a-3p	NM_001171510	MCFD2	((((((((((((((.(((((...&.)))))))))).))))))))).	598	633	1	-23.5	1	0.00198062	0.588	0.927895	0.58687	-4.67302	19	22	10	3UTR		1	1
hsa-miR-103a-3p	NM_001171511	MCFD2	((((((((((((((.(((((...&.)))))))))).))))))))).	689	724	1	-23.5	1	0.00198062	0.588	0.301367	0.402769	-4.67302	19	22	10	3UTR		1	1
hsa-miR-103a-3p	NM_001172703	GGA3	.((((((((((.((((((.(((.&)))))))))...)))))))).)).	2294	2318	1	-24.9	1	0.000735292	0.412	0.99654	1.10627	-7.14013	19	24	9	3UTR	MIRT027133	1	1
hsa-miR-103a-3p	NM_001172704	GGA3	.((((((((...(((((((....&)))))))..)))).)))).	2751	2770	1	-21.4	1	0.00107399	0.515	5.74956	5.40532	-11.2074	15	19	7	3UTR	MIRT027133	1	1
hsa-miR-103a-3p	NM_001173982	CHST11	.((((((..((((((((......&))))))))..)))))).	5573	5590	1	-23	1	0.00357762	0.574	2.54586	2.52123	-7.16335	14	17	8	3UTR		1	1
hsa-miR-103a-3p	NM_001184906	FBXL20	.((((((((...(((((......&))))).)))))))).	9859	9874	1	-20.7	1	0.0010273	0.426	6.08738	5.59033	-11.2074	13	15	8	3UTR		1	1
hsa-miR-103a-3p	NM_001190737	NFIB	(((.((((((((((.((((((((&)))))))).)))))))).)).))).	3813	3838	1	-26.6	1	0.00237096	0.676	0.536853	1.02027	-7.70505	21	25	8	3UTR		1	1
hsa-miR-103a-3p	NM_001190738	NFIB	(((.((((((((((.((((((((&)))))))).)))))))).)).))).	3391	3416	1	-26.6	1	0.00237096	0.676	1.52223	0.966741	-7.70505	21	25	8	3UTR		1	1
hsa-miR-103a-3p	NM_001190977	YAF2	.(((((.(((((...(((.....&)))......)))))))))).	1306	1326	1	-17	1	0.113053	0.721	0.83085	0.111015	-8.21843	13	20	10	3UTR	MIRT027053	1	1
hsa-miR-103a-3p	NM_001197218	PDE4D	(((((.(((((((((.((.....&)).)))))))))))))).	5331	5349	1	-21.9	1	0.0156975	0.544	1.63774	0.735352	-6.07158	16	18	14	3UTR	MIRT027087	1	1
hsa-miR-103a-3p	NM_001197219	PDE4D	(((((.(((((((((.((.....&)).)))))))))))))).	4942	4960	1	-21.9	1	0.0156975	0.544	2.97929	3.28541	-6.07158	16	18	14	3UTR	MIRT027087	1	1
hsa-miR-103a-3p	NM_001197220	PDE4D	(((((.(((((((((.((.....&)).)))))))))))))).	5507	5525	1	-21.9	1	0.0156975	0.544	2.44773	3.52177	-6.07158	16	18	14	3UTR	MIRT027087	1	1
hsa-miR-103a-3p	NM_001197221	PDE4D	(((((.(((((((((.((.....&.)).)))))))))))))).	4766	4813	1	-21.9	1	0.0156975	0.544	1.65039	1.38319	-6.07158	16	19	14	3UTR	MIRT027087	1	1
hsa-miR-103a-3p	NM_001197223	PDE4D	(((((.(((((((((.((.....&.)).)))))))))))))).	4644	4691	1	-21.9	1	0.0156975	0.544	0.749809	0.894409	-6.07158	16	19	14	3UTR	MIRT027087	1	1
hsa-miR-103a-3p	NM_001199155	KAT7	.((((.(((((((((((((((.(&).))))))))))).)))))))).	5401	5424	1	-21.7	1	0.0500778	0.529	0.222408	-0.221753	-5.69428	20	23	11	3UTR		1	1
hsa-miR-103a-3p	NM_001199156	KAT7	.((((.(((((((((((((((.(&).))))))))))).)))))))).	5074	5097	1	-21.7	1	0.0500778	0.529	0.222408	-0.221753	-5.69428	20	23	11	3UTR		1	1
hsa-miR-103a-3p	NM_001199157	KAT7	.((((.(((((((((((((((.(&).))))))))))).)))))))).	5161	5184	1	-21.7	1	0.0500778	0.529	0.222408	-0.221753	-5.69428	20	23	11	3UTR		1	1
hsa-miR-103a-3p	NM_001199158	KAT7	.((((.(((((((((((((((.(&).))))))))))).)))))))).	4984	5007	1	-21.7	1	0.0500778	0.529	0.222408	-0.221753	-5.69428	20	23	11	3UTR		1	1
hsa-miR-103a-3p	NM_001199514	TGIF2	(((((((..((((((.((((((.&)))))).))).)))...))))))).	1050	1075	1	-25.1	1	9.99e-05	0.485	0	0	-7.54065	19	25	7	3UTR		1	1
hsa-miR-103a-3p	NM_001199579	SUN2	.((((((((((((((((......&)))))).)))).)))))).	3933	3952	1	-21.7	1	0.0618247	0.574	0	0	-3.79332	16	19	6	3UTR	MIRT027033	1	1
hsa-miR-103a-3p	NM_001199580	SUN2	.((((((((((((((((......&)))))).)))).)))))).	3894	3913	1	-21.7	1	0.0618247	0.574	0	0	-3.79332	16	19	6	3UTR	MIRT027033	1	1
hsa-miR-103a-3p	NM_001199671	CALU	...((((((((.(((((((.((.&)).))))))).)))))))).	5418	5438	1	-23.6	1	0.0016439	0.559	0	0	-9.86134	17	20	8	3UTR	MIRT027157	1	1
hsa-miR-103a-3p	NM_001199673	CALU	...((((((((.(((((((.((.&)).))))))).)))))))).	4403	4423	1	-23.6	1	0.0016439	0.559	0.2428	0.184173	-9.86134	17	20	8	3UTR	MIRT027157	1	1
hsa-miR-103a-3p	NM_001201480	OSBPL6	(((((((((((((.(((......&))).)))).....))))))))).	9144	9167	1	-20	1	0.0589435	0.574	0	0	-4.79441	16	23	9	3UTR		1	1
hsa-miR-103a-3p	NM_001201481	OSBPL6	(((((((((((((.(((......&))).)))).....))))))))).	8976	8999	1	-20	1	0.0589435	0.574	0	0	-4.79441	16	23	9	3UTR		1	1
hsa-miR-103a-3p	NM_001201482	OSBPL6	(((((((((((((.(((......&))).)))).....))))))))).	8961	8984	1	-20	1	0.0589435	0.574	0.125579	-0.313085	-4.79441	16	23	9	3UTR		1	1
hsa-miR-103a-3p	NM_001201482	OSBPL6	.......((((((.(((((((.(&).))))))).)))))).	8598	8615	1	-19.4	0	0.00370496	0.632	0.447456	-0.0611351	-17.9671	14	17	7	3UTR		1	1
hsa-miR-103a-3p	NM_001204077	UBE4A	((((((((((....((((((((.&)))))).))..)))))))))).	5265	5287	1	-22.7	1	0.0223345	0.632	0	0	-12.2551	18	22	10	3UTR		1	1
hsa-miR-103a-3p	NM_001204218	NOS1	.((.(((..(((((((((.(((.&))))))))))))..))).)).	11643	11664	1	-24.1	1	0.0161059	0.456	0	0	-10.1954	17	21	12	3UTR		1	1
hsa-miR-103a-3p	NM_001204492	CAMK2G	.((((((.(((...(((((....&)))))..))).)))))).	2349	2367	1	-21.6	1	0.000190212	0.471	4.3633	3.56493	-11.5997	14	18	6	3UTR		1	1
hsa-miR-103a-3p	NM_001219	CALU	...((((((((.(((((((.((.&)).))))))).)))))))).	4603	4623	1	-23.6	1	0.0016439	0.559	0.0478346	-0.0199998	-9.86134	17	20	8	3UTR	MIRT027157	1	1
hsa-miR-103a-3p	NM_001222	CAMK2G	.....((((((((((((((((((&)))))))))))).)))))).	3535	3555	1	-22.5	1	0.0840358	0.706	1.93604	2.47682	-13.6656	18	20	12	3UTR		1	1
hsa-miR-103a-3p	NM_001242466	PIK3R1	(((((((((.(...((((.....&.))))).))))))))).	5018	5052	1	-21.9	1	0.000625605	0.662	0	0	-10.6729	14	17	9	3UTR	MIRT314097	1	1
hsa-miR-103a-3p	NM_001244808	FOXP1	((((((...((((((((((....&.))))))))))..............)))))).	5194	5237	1	-24.7	1	0.00146904	0.544	6.38567	5.98234	-8.85129	16	32	10	3UTR		1	1
hsa-miR-103a-3p	NM_001244810	FOXP1	((((((...((((((((((....&.))))))))))..............)))))).	5156	5199	1	-24.7	1	0.00146904	0.544	6.75081	6.68347	-8.85129	16	32	10	3UTR		1	1
hsa-miR-103a-3p	NM_001244812	FOXP1	((((((...((((((((((....&.))))))))))..............)))))).	4530	4573	1	-24.7	1	0.00146904	0.544	2.35266	2.98479	-8.85129	16	32	10	3UTR		1	1
hsa-miR-103a-3p	NM_001244816	FOXP1	((((((...((((((((((....&.))))))))))..............)))))).	5024	5067	1	-24.7	1	0.00146904	0.544	7.16699	6.81349	-8.85129	16	32	10	3UTR		1	1
hsa-miR-125a-5p	NM_002310	LIFR	((((((((((...((.(((((((.&)))).))))).)))))))))).	8014	8036	0.953846	-20.7	1	0.011073	0.647	3.41822	2.40052	-11.6313	19	22	10	3UTR	MIRT053792	1	1
hsa-miR-125a-5p	NM_001271282	DICER1	(((((((((.......(((((...&))))).......))))))))).	8276	8298	0.961538	-19.6	1	0.0121572	0.662	6.1556	3.80025	-14.4661	14	22	9	3UTR		1	1
hsa-miR-125a-5p	NM_001282429	SLC38A9	.((((((((..(((((..((((..&.)))))))))..)))))))).	2060	2102	0.961538	-21.6	1	0.0495104	0.574	4.80027	2.89342	-7.86061	17	21	9	3UTR		1	1
hsa-miR-125a-5p	NM_080491	GAB2	..(((((((((((((..(((((..&))))).)))).......))))))))).	5582	5609	0.961538	-25.3	1	0.000696182	0.412	3.57836	3.49838	-5.19005	18	27	9	3UTR		1	1
hsa-miR-125a-5p	NM_203499	DDX42	.(((((((((((((((.(((..((&.))..))).)))))))))))..)))).	3280	3328	0.961538	-26.3	1	0.000600206	0.632	0.417457	0.890155	-3.79332	20	27	11	3UTR		1	1
hsa-miR-125a-5p	NM_020883	ZSWIM5	((((..(((((((((..(((((..&)))))..)))).....))))))))).	4577	4603	0.961538	-22.6	1	0.00748363	0.544	4.69431	5.52988	-10.1906	18	26	9	3UTR		1	1
hsa-miR-125a-5p	NM_030621	DICER1	(((((((((.......(((((...&))))).......))))))))).	8344	8366	0.961538	-19.6	1	0.0121572	0.662	5.45739	4.82552	-14.4661	14	22	9	3UTR		1	1
hsa-miR-125a-5p	NM_007372	DDX42	.(((((((((((((((.(((..((&.))..))).)))))))))))..)))).	3332	3380	0.961538	-26.3	1	0.000600206	0.632	0.417457	0.890155	-3.79332	20	27	11	3UTR		1	1
hsa-miR-125a-5p	NM_001349385	SLC38A9	.((((((((..(((((..((((..&.)))))))))..)))))))).	1998	2040	0.961538	-21.6	1	0.0495104	0.574	5.0522	2.18503	-7.86061	17	21	9	3UTR		1	1
hsa-miR-125a-5p	NM_001195573	DICER1	(((((((((.......(((((...&))))).......))))))))).	7934	7956	0.961538	-19.6	1	0.0121572	0.662	5.34437	4.94532	-14.4661	14	22	9	3UTR		1	1
hsa-miR-125a-5p	NM_001271869	SZRD1	(((((..(((((((((((((.(..&).))))))))))...)))..))))).	724	750	0.974359	-23.1	1	0.0074353	0.412	1.60591	2.00371	-7.38222	19	26	10	3UTR		1	1
hsa-miR-125a-5p	NM_001039479	AREL1	..((((.(.((((((.(((((...&))))).))))))))))).	5342	5360	0.974359	-22.1	1	3.13e-06	0.5	-0.100296	-0.251466	-7.79013	16	18	11	3UTR		1	1
hsa-miR-125a-5p	NM_001114600	SZRD1	(((((..(((((((((((((.(..&).))))))))))...)))..))))).	727	753	0.974359	-23.1	1	0.0074353	0.412	1.60591	2.00371	-7.38222	19	26	10	3UTR		1	1
hsa-miR-125a-5p	NM_001136000	ABL2	.((.((((.(((.(((((((.(((&))).)))))))))))))).)).	5900	5922	0.974359	-25.3	1	2.78e-05	0.544	0.972004	0.689368	-9.17087	19	22	14	3UTR	MIRT732714	1	1
hsa-miR-125a-5p	NM_001168238	ABL2	.((.((((.(((.(((((((.(((&))).)))))))))))))).)).	6130	6152	0.974359	-25.3	1	2.78e-05	0.544	0.769284	0.3247	-9.17087	19	22	14	3UTR	MIRT732714	1	1
hsa-miR-125a-5p	NM_005440	RND2	(((((((..(((....((((((..&)))))))))..))))))).	1047	1066	0.978022	-24.4	1	0.00218936	0.412	-0.13176	0.148788	-10.4221	16	19	9	3UTR		1	1
hsa-miR-125a-5p	NM_001258286	SLC38A9	.((((((((..(((((..((((..&.)))))))))..)))))))).	2314	2385	1	-21.6	1	0.0495104	0.574	0.537	0.9283	-7.86061	17	21	9	3UTR		1	1
hsa-miR-125a-5p	NM_001258287	SLC38A9	.((((((((..(((((..((((..&.)))))))))..)))))))).	2310	2381	1	-21.6	1	0.0495104	0.574	0.537	0.9283	-7.86061	17	21	9	3UTR		1	1
hsa-miR-125a-5p	NM_001258298	SHTN1	..(((((((((((..((((((((.&))))).)...))..)))))).))))).	6245	6272	1	-20.9	1	0.0243661	0.588	0	0	-6.54929	19	27	6	3UTR		1	1
hsa-miR-125a-5p	NM_001258401	SLC4A8	((((((.((((((((..(((((..&))))))))))).)))))))).	4002	4023	1	-24.9	1	0.0306826	0.559	-0.340504	0.0596839	-5.71431	19	21	11	3UTR		1	1
hsa-miR-125a-5p	NM_001270520	DAAM1	(((((((((..(((((........&))))).))))))))).	4500	4516	1	-18.8	1	0.00848407	0.721	4.54959	2.80056	-8.00486	14	16	9	3UTR		1	1
hsa-miR-125a-5p	NM_001271869	SZRD1	.(((((((((((((...((((((.&))))))))))))))))).)).	997	1018	1	-23.2	1	0.0269284	0.662	2.26855	2.2341	-4.76182	19	21	17	3UTR		1	1
hsa-miR-125a-5p	NM_001271869	SZRD1	..((((.(((((((((.(((.((.&)).)))...))))))))))))).	3007	3030	1	-22.6	1	8.07e-07	0.426	2.70052	2.66949	-6.50069	18	23	13	3UTR		1	1
hsa-miR-125a-5p	NM_001271938	MEGF8	.(((((((((((.....((((((.&)))))).....)))......)))))))).	9777	9806	1	-25.9	1	7.97e-05	0.515	0.375773	-0.0952912	-6.90779	17	29	8	3UTR		1	1
hsa-miR-125a-5p	NM_001278098	GDNF	..(((((((((((...((((.((.&)).)))))))))))..)))).	2245	2266	1	-23.8	1	2.79e-05	0.353	1.57565	1.32649	-6.78234	17	21	11	3UTR		1	1
hsa-miR-125a-5p	NM_001281518	CEP85	(((((((((((((((.........&)))).)))))))).))).	974	992	1	-20.8	1	5.55e-05	0.412	0.265122	0.361553	-4.17062	15	18	8	3UTR		1	1
hsa-miR-125a-5p	NM_001282116	RFX3	(((((((..((((....(((....&)))...)))).))))))).	5129	5148	1	-20.5	1	0.00103855	0.559	2.38541	1.64864	-9.13294	14	19	7	3UTR		1	1
hsa-miR-125a-5p	NM_001282166	SUV39H1	((((((((((.(((((.((.(((.&))).)).)))))...................)))))))))).	2448	2490	1	-24.6	1	0.00485556	0.426	0	0	-6.76235	20	42	10	3UTR		1	1
hsa-miR-125a-5p	NM_001282715	OLFML2A	((((((.(((((((((((((((..&))).))).)))).....))))))))))).	2625	2654	1	-23	1	0.00632264	0.426	-0.0669312	-0.240237	-5.48126	21	29	11	3UTR		1	1
hsa-miR-125a-5p	NM_001282787	NFIB	....(((((((((((..(((.(((&.))).))).))))))))))).	2949	2987	1	-20.5	1	0.000804706	0.662	1.33602	1.94013	-9.77961	17	21	11	3UTR		1	1
hsa-miR-125a-5p	NM_001286490	FRMD5	(((((((((((((...........&.))))).)))))))).	3350	3374	1	-21.2	1	0.00127567	0.662	5.22666	2.58826	-5.76291	13	16	8	3UTR		1	1
hsa-miR-125a-5p	NM_001289979	NUMBL	((((((((.(((((((.(((((..&))))).)))))))..........)))))))).	2269	2301	1	-25.1	1	0.00430222	0.338	4.96617	2.04021	-4.99396	20	32	8	3UTR		1	1
hsa-miR-125a-5p	NM_001289980	NUMBL	((((((((.(((((((.(((((..&))))).)))))))..........)))))))).	2202	2234	1	-25.1	1	0.00430222	0.338	1.53788	1.58431	-4.99396	20	32	8	3UTR		1	1
hsa-miR-125a-5p	NM_001290257	KHNYN	.((((..((((((((((((((...&))))..))))))))))..)))).	6500	6523	1	-23.6	1	8.26e-07	0.426	3.69415	2.35756	-7.23797	18	23	10	3UTR		1	1
hsa-miR-125a-5p	NM_001291726	PGAP3	(((((...(((((((.((((....&.)))).)))))))....))))).	2453	2506	1	-24	1	0.000755246	0.582	1.75022	1.81223	-9.9289	16	23	7	3UTR		1	1
hsa-miR-125a-5p	NM_001291728	PGAP3	(((((...(((((((.((((....&.)))).)))))))....))))).	2543	2596	1	-24	1	0.000755246	0.582	1.75022	1.81223	-9.9289	16	23	7	3UTR		1	1
hsa-miR-125a-5p	NM_001291733	PGAP3	(((((...(((((((.((((....&.)))).)))))))....))))).	2139	2192	1	-24	1	0.000755246	0.582	1.75022	1.81223	-9.9289	16	23	7	3UTR		1	1
hsa-miR-125a-5p	NM_001297562	TNFSF4	.(((((((((((((((.((((((.&.)))))).))).)))).........)))))))).	1404	1452	1	-26.9	1	0.000309964	0.559	-0.0806214	0.165366	-3.79332	21	34	8	3UTR		1	1
hsa-miR-125a-5p	NM_001300727	DTX4	((((((.(((((((...(((((..&.)))))..))))))))).)))).	3912	3949	1	-25.1	1	0.000319944	0.456	-0.103284	-0.218132	-6.44976	18	23	9	3UTR		1	1
hsa-miR-125a-5p	NM_001301017	NKAPD1	(((((.((((((((..........&))))))))..))))).	2486	2502	1	-20.2	1	0.000428656	0.662	-0.0101963	0.824758	-6.80703	13	16	8	3UTR		1	1
hsa-miR-125a-5p	NM_001301019	NKAPD1	(((((.((((((((..........&))))))))..))))).	2530	2546	1	-20.2	1	0.000428656	0.662	-0.0101963	0.824758	-6.80703	13	16	8	3UTR		1	1
hsa-miR-125a-5p	NM_001302621	ACHE	(((((((((((((((..(((((..&.)))))..)))))).................))))))))).	2070	2138	1	-28.5	1	7.84e-05	0.397	2.37557	2.87554	-4.17062	20	41	9	3UTR		1	1
hsa-miR-125a-5p	NM_001313726	ANO3	((((((((((........(((.((&.)).))).....)))))))))).	3726	3759	1	-20.3	1	0.00125819	0.529	0.698937	1.44711	-13.2236	15	23	10	3UTR		1	1
hsa-miR-125a-5p	NM_001313727	ANO3	((((((((((((((((((((((((&))))))))))).)))..........)))))...........................))))).	3188	3251	1	-23.8	1	0.00209851	0.574	1.06186	0.742732	-3.93757	24	63	11	3UTR		1	1
hsa-miR-125a-5p	NM_001318082	ZKSCAN5	((((((((..(((((..(((....&)))..)))))..)))))))).	3449	3470	1	-23	1	0.00432524	0.456	0.812169	0.0359796	-6.46952	16	21	8	3UTR		1	1
hsa-miR-125a-5p	NM_030645	SH3BP5L	.(((((((..(((((((((((((.&)))))))))))))....................))))))).	2976	3017	1	-27.2	1	1.25e-05	0.426	1.63453	1.00109	-6.09222	20	41	13	3UTR	MIRT443832	1	1
hsa-miR-125a-5p	NM_030915	LBH	(((((...((((.(((((((.(..&.).))))))).))))..))))).	765	798	1	-23.9	1	0.00762985	0.485	0.822041	1.35536	-10.985	17	23	7	3UTR		1	1
hsa-miR-125a-5p	NM_031418	ANO3	((((((((((........(((.((&.)).))).....)))))))))).	3320	3353	1	-20.3	1	0.00125819	0.529	0.805992	0.108917	-13.2236	15	23	10	3UTR		1	1
hsa-miR-125a-5p	NM_032103	PPP1R12B	(((((((...((((((((((((..&)))))).))))))))))))).	12432	12453	1	-25.3	1	0.000183165	0.382	-0.654741	-0.519636	-8.55011	19	21	13	3UTR		1	1
hsa-miR-125a-5p	NM_032104	PPP1R12B	(((((((...((((((((((((..&)))))).))))))))))))).	12613	12634	1	-25.3	1	0.000183165	0.382	-0.654741	-0.519636	-8.55011	19	21	13	3UTR		1	1
hsa-miR-125a-5p	NM_032333	PRXL2A	.((((..(((((((..(((.((((&))))..)))..))))))).)))).	4722	4746	1	-23.1	1	0.00208828	0.5	-0.717455	-0.0273609	-8.20647	18	24	7	3UTR		1	1
hsa-miR-125a-5p	NM_032440	LCOR	.((((..((((((((.((((.((.&)).)))))))))))).)))).	7650	7671	1	-22.7	1	0.00108671	0.441	0.764306	2.38633	-7.47102	18	21	12	3UTR		1	1
hsa-miR-125a-5p	NM_032548	ABTB1	((((((((.((((((.((((((((&.))))...))))..))))))))))).))).	1612	1654	1	-25.8	1	6.85e-05	0.368	-0.284983	-0.571701	-5.22701	22	30	11	3UTR		1	1
hsa-miR-125a-5p	NM_033419	PGAP3	(((((...(((((((.((((....&.)))).)))))))....))))).	2606	2659	1	-24	1	0.000755246	0.582	1.75022	1.81223	-9.9289	16	23	7	3UTR		1	1
hsa-miR-125a-5p	NM_033656	BRWD1	((((((.((((((((((.......&)))))).))))...)))))).	13115	13136	1	-20.6	1	0.00123481	0.632	1.08793	1.86722	-5.48126	16	21	6	3UTR		1	1
hsa-miR-125a-5p	NM_052870	SNX18	(((((((..(((....((((.(..&).))))..)))..))))))).	2693	2714	1	-22	1	0.00576586	0.471	0.19384	-0.0133487	-10.4221	15	21	7	3UTR		1	1
hsa-miR-125a-5p	NM_080491	GAB2	(((((((..((((....(((((..&.)))))...))))..))))))).	4234	4273	1	-29.1	1	0.0142027	0.426	5.83389	5.037	-9.13294	16	23	7	3UTR		1	1
hsa-miR-125a-5p	NM_130446	KLHL6	.((((.(((((.(((((((.(((.&)))..))))))).))))))))).	4974	4997	1	-25.1	1	0.00173127	0.515	4.39319	4.29405	-9.04109	19	23	9	3UTR		1	1
hsa-miR-125a-5p	NM_133264	WIPF2	.((((((((((((((..(((....&)))..)))))))..))).)))).	5129	5152	1	-23.7	1	9.45e-05	0.412	1.3021	1.43291	-4.02637	17	23	7	3UTR		1	1
hsa-miR-125a-5p	NM_138317	KCNK10	..(((((.((((((((((((((..&))))))))))).))).))))).	5600	5622	1	-25.4	1	0.00166118	0.456	3.36278	2.77987	-7.27064	19	22	11	3UTR		1	1
hsa-miR-125a-5p	NM_138317	KCNK10	((((((((.((((....((((((.&)))).))....)).)))))))))).	4429	4454	1	-24.5	1	0.0322746	0.574	1.36008	2.0198	-6.8193	18	25	10	3UTR		1	1
hsa-miR-125a-5p	NM_138318	KCNK10	..(((((.((((((((((((((..&))))))))))).))).))))).	5251	5273	1	-25.4	1	0.00166118	0.456	1.79489	1.55395	-7.27064	19	22	11	3UTR		1	1
hsa-miR-125a-5p	NM_138318	KCNK10	((((((((.((((....((((((.&)))).))....)).)))))))))).	4080	4105	1	-24.5	1	0.0322746	0.574	0.157921	-0.0795777	-6.8193	18	25	10	3UTR		1	1
hsa-miR-125a-5p	NM_138799	MBOAT2	.....(((((((((((........&.))))))))))).	6131	6146	1	-18.4	1	0.000650526	0.632	0.692603	1.49718	-13.6656	11	13	11	3UTR		1	1
hsa-miR-125a-5p	NM_139276	STAT3	.((((((.((((((...((((...&))))..)))))))))))).	4520	4539	1	-23.3	1	0.000361684	0.515	6.31332	4.7098	-7.07546	16	19	12	3UTR	MIRT731625	1	1
hsa-miR-125a-5p	NM_145102	ZKSCAN5	((((((((..(((((..(((....&)))..)))))..)))))))).	3387	3408	1	-23	1	0.00432524	0.456	0.812169	0.0359796	-6.46952	16	21	8	3UTR		1	1
hsa-miR-125a-5p	NM_145803	TRAF6	((((((((..(((((((((((.((&))))))))).....))))...)))))))).	2471	2501	1	-23.2	1	0.000958061	0.676	0.112475	-0.159916	-6.23647	21	30	9	3UTR	MIRT438046	1	1
hsa-miR-125a-5p	NM_152283	ZFP62	(((((((((((.(((..((((...&.))))..)))..))))))))))).	3245	3312	1	-26.4	1	0.00192345	0.662	-0.34782	1.81039	-7.51743	18	24	11	3UTR		1	1
hsa-miR-125a-5p	NM_152345	ANKRD13B	.(((((((((((............&))))))))))).	2957	2969	1	-24.3	1	4.88e-06	0.324	0.978205	0.656714	-6.90779	11	12	11	3UTR		1	1
hsa-miR-125a-5p	NM_152383	DIS3L2	.((((...(((((((..(((((..&)))))..))))))))))).	2964	2983	1	-24.7	1	0.000625471	0.426	0.483709	0.514893	-9.78465	16	19	11	3UTR		1	1
hsa-miR-125a-5p	NM_152729	NT5DC1	.((((((((..(((...(((....&)))..)))..)))))))).	2857	2876	1	-18.7	1	0.00164459	0.691	1.4348	0.237481	-8.8291	14	19	8	3UTR		1	1
hsa-miR-125a-5p	NM_171997	USP2	(((((((((..(((...((.....&.))...)))..))))))))).	2582	2613	1	-19.6	1	0.000766564	0.426	4.72826	4.34502	-8.97335	14	21	9	3UTR		1	1
hsa-miR-125a-5p	NM_172027	ABTB1	((((((((.((((((.((((((((&.))))...))))..))))))))))).))).	1601	1643	1	-25.8	1	6.85e-05	0.368	-0.746224	-0.576843	-5.22701	22	30	11	3UTR		1	1
hsa-miR-125a-5p	NM_173216	ST6GAL1	(((((((((((((....((((((.&)))))))))...........))))))).))).	2692	2724	1	-21.7	1	0.0193956	0.574	0.0837436	-0.219619	-5.76291	19	32	9	3UTR		1	1
hsa-miR-125a-5p	NM_173217	ST6GAL1	(((((((((((((....((((((.&)))))))))...........))))))).))).	2035	2067	1	-21.7	1	0.0193956	0.574	0.0837436	-0.219619	-5.76291	19	32	9	3UTR		1	1
hsa-miR-125a-5p	NM_173514	SLC38A9	.((((((((..(((((..((((..&.)))))))))..)))))))).	2182	2224	1	-21.6	1	0.0495104	0.574	3.8328	2.73704	-7.86061	17	21	9	3UTR		1	1
hsa-miR-125a-5p	NM_174934	SCN4B	..((((((.((((((((((((.((&.)))))))))..))))).)))))).	1508	1554	1	-24.9	1	2.39e-06	0.353	0.554339	0.688751	-6.01339	20	25	9	3UTR		1	1
hsa-miR-125a-5p	NM_175709	CBX7	(((((..(((((((((((((.((.&)).))))........)))))))))..))))).	2978	3010	1	-25.5	1	0.0171042	0.485	-0.0666982	0.615821	-7.38222	20	32	9	3UTR		1	1
hsa-miR-125a-5p	NM_178441	ZFYVE1	.((((((((.(((......(((((&))))).......))).)))))))).	1219	1244	1	-22.6	1	0.00118713	0.471	0.920272	1.06554	-6.86117	16	25	8	3UTR		1	1
hsa-miR-125a-5p	NM_178586	PPP2R5C	.....((((((((((((((.(((.&))).)))......))))))))))).	2119	2144	1	-22.4	1	0.0150379	0.529	0.028995	0.246162	-13.6656	17	25	11	3UTR		1	1
hsa-miR-125a-5p	NM_182487	OLFML2A	((((((.(((((((((((((((..&))).))).)))).....))))))))))).	3231	3260	1	-23	1	0.00632264	0.426	-0.0669312	-0.240237	-5.48126	21	29	11	3UTR		1	1
hsa-miR-125a-5p	NM_194278	MIDEAS	..((((.((.((((((((((((..&)))).)))))))).)))))).	4554	4575	1	-23.3	1	0.00069166	0.456	2.63331	2.55526	-7.74319	18	21	8	3UTR		1	1
hsa-miR-125a-5p	NM_194317	LYPD6	..(((((..((((((((((.((.(&.).)).))).))))))).))))).	3057	3096	1	-21.8	1	0.000611404	0.412	0.963157	0.676936	-8.32703	18	24	7	3UTR		1	1
hsa-miR-125a-5p	NM_199231	GDNF	..(((((((((((...((((.((.&)).)))))))))))..)))).	2262	2283	1	-23.8	1	2.79e-05	0.353	1.1249	1.31465	-6.78234	17	21	11	3UTR		1	1
hsa-miR-125a-5p	NM_199231	GDNF	((((....(((((...((((((((&)))))).))..))))))))).	1318	1339	1	-20.8	1	0.00159841	0.5	0.109054	-0.139185	-15.6402	17	21	9	3UTR		1	1
hsa-miR-125a-5p	NM_203403	LURAP1L	(((((..(((((.((...((.(((&))).)).)).)))))))))).	1679	1700	1	-18.9	1	0.0211766	0.691	1.84987	1.98971	-8.9044	17	21	10	3UTR		1	1
hsa-miR-125a-5p	NM_203499	DDX42	.((((((((((((...(((.....&)))....))).))))))))).	3093	3114	1	-24.4	1	0.0101726	0.544	2.40039	1.01872	-5.61866	15	21	9	3UTR		1	1
hsa-miR-125a-5p	NM_207370	GPR153	(((((((((((((((.((((....&.))))..)))))))))).......))))).	2675	2717	1	-24.7	1	0.000362243	0.397	1.90936	3.21919	-4.17062	19	30	10	3UTR		1	1
hsa-miR-125a-5p	XM_005251467	NFIB	....(((((((((((..(((.(((&.))).))).))))))))))).	3815	3853	1	-20.5	1	0.000804706	0.662	0	0	-9.77961	17	21	11	3UTR		1	1
hsa-miR-125a-5p	XM_005259338	KMT5C	((((((((((((........((((&.))))..........)))))))))))).	1907	1961	1	-27.7	1	0.000570556	0.368	0	0	-7.05204	16	28	12	3UTR		1	1
hsa-miR-125a-5p	XM_005271945	JADE2	((((((((.((((((.((((((..&)))))))))))))).)))))).	3612	3634	1	-26.7	1	0.000202556	0.324	0	0	-5.22701	20	22	14	3UTR		1	1
hsa-miR-125a-5p	XM_006721657	DDX42	.(((((((((((((((.(((..((&.))..))).)))))))))))..)))).	3469	3517	1	-26.3	1	0.000600206	0.632	0	0	-3.79332	20	27	11	3UTR		1	1
hsa-miR-125a-5p	XM_006721657	DDX42	.((((((((((((...(((.....&)))....))).))))))))).	3282	3303	1	-24.4	1	0.0101726	0.544	0	0	-5.61866	15	21	9	3UTR		1	1
hsa-miR-125a-5p	XM_006723179	SERTAD3	((((((((.((((...........&.)))).)))))))).	1106	1147	1	-22.1	1	0.000224316	0.441	0	0	-6.8193	12	15	8	3UTR		1	1
hsa-miR-125a-5p	XM_006723600	EBF4	((((((((..(((((..(((....&)))..)))))....)))))))).	2229	2252	1	-22.3	1	0.000250284	0.426	0	0	-6.46952	16	23	8	3UTR		1	1
hsa-miR-125a-5p	XM_011510976	GPC1	.((((.((((((((((((((.(..&).)))..))))))))))).)))).	3106	3130	1	-27.9	1	0.00045414	0.338	0	0	-5.69428	19	24	11	3UTR		1	1
hsa-miR-125a-5p	XM_011518125	SEMA4D	((((((((((((....(((((((.&))).))))))))))).....))))).	3981	4007	1	-21.5	1	0.0729219	0.426	0	0	-7.05204	19	26	11	3UTR		1	1
hsa-miR-125a-5p	XM_011518130	SEMA4D	((((((((((((....(((((((.&))).))))))))))).....))))).	4098	4124	1	-21.5	1	0.0729219	0.426	0	0	-7.05204	19	26	11	3UTR		1	1
hsa-miR-125a-5p	XM_011523831	KCNJ12	..(((((.((((((((..(((((.&)))))))))))))..))))).	2682	2703	1	-22.6	1	0.000119463	0.382	0	0	-7.27064	18	21	13	3UTR		1	1
hsa-miR-125a-5p	XM_011533000	TTC7A	((((((((.((((...(((((((.&.)).)))))..)))).)))))))).	2082	2126	1	-30.7	1	9.52e-05	0.426	0	0	-6.8193	19	25	8	3UTR		1	1
hsa-miR-125a-5p	XM_011534646	CCNJL	..((((((.((((((...((((..&.))))..))))))..)))))).	2485	2509	1	-21.9	1	1.82e-05	0.515	0	0	-6.24644	16	22	6	3UTR		1	1
hsa-miR-125a-5p	XM_017000542	ELAVL4	..(((((((((((.(((..((((.&))))))).)).))))))))).	601	622	1	-21	1	0.00777205	0.588	0	0	-5.81384	18	21	9	3UTR		1	1
hsa-miR-125a-5p	XM_017002215	TNFRSF1B	..((((((((((((((((((((..&.))))))))))))).................))))))).	2974	3043	1	-30.5	1	7.59e-05	0.471	0	0	-4.957	20	39	13	3UTR		1	1
hsa-miR-125a-5p	XM_024448871	RPS6KA1	....((((((((((...((((((.&)))))))))))))))).	2909	2926	1	-24	1	0.00019322	0.441	0	0	-10.5151	16	17	16	3UTR		1	1
hsa-miR-125a-5p	XM_024450558	DDX42	.(((((((((((((((.(((..((&.))..))).)))))))))))..)))).	2917	2965	1	-26.3	1	0.000600206	0.632	0	0	-3.79332	20	27	11	3UTR		1	1
hsa-miR-125a-5p	XM_024450558	DDX42	.((((((((((((...(((.....&)))....))).))))))))).	2730	2751	1	-24.4	1	0.0101726	0.544	0	0	-5.61866	15	21	9	3UTR		1	1
hsa-miR-125a-5p	XM_024450656	ZNF652	((((((((.((((.(..(((((((&)))))))..).)))).))....)))))).	2655	2684	1	-25.3	1	0.000176188	0.574	0	0	-6.08385	20	29	7	3UTR		1	1
hsa-miR-125a-5p	XM_024453013	TTC7A	((((((((.((((...(((((((.&.)).)))))..)))).)))))))).	1685	1729	1	-30.7	1	9.52e-05	0.426	0	0	-6.8193	19	25	8	3UTR		1	1
hsa-miR-125a-5p	NM_014569	ZKSCAN5	((((((((.((((((..(((((((&.))))))....)..))))))..)))))))).	3470	3507	1	-23.9	1	0.00432524	0.456	0	0	-5.22701	21	31	8	3UTR		1	1
hsa-miR-125a-5p	NM_014764	DAZAP2	(((((((((..(((.(((((....&))))).)))....))))))))).	1648	1671	1	-19.6	1	0.0146599	0.706	3.8006	1.88586	-8.7403	17	23	9	3UTR		1	1
hsa-miR-125a-5p	NM_014764	DAZAP2	.......(((((((((((((....&))))))).)))))).	1582	1597	1	-18.7	0	0.000290909	0.574	0.761889	1.02404	-17.1102	13	15	7	3UTR		1	1
hsa-miR-125a-5p	NM_014941	MORC2	...(((...((((((((((((.((&))))))))))))))....))).	5052	5074	1	-23.5	1	0.000109072	0.485	0.0323975	0.469585	-11.4283	17	22	14	3UTR	MIRT045739	1	1
hsa-miR-125a-5p	NM_014992	DAAM1	(((((((((..(((((........&))))).))))))))).	4428	4444	1	-18.8	1	0.00848407	0.721	4.54959	2.80056	-8.00486	14	16	9	3UTR		1	1
hsa-miR-125a-5p	NM_015044	GGA2	..(((((((((((((((((((((.&.)))))))))))..........)))....))))))).	2658	2702	1	-24.1	1	1.81e-05	0.426	-0.00593056	-0.25108	-4.957	21	37	11	3UTR		1	1
hsa-miR-125a-5p	NM_015177	DTX4	((((((.(((((((...(((((..&)))))..))))))))).)))).	4543	4565	1	-24.7	1	0.000319944	0.456	-0.5957	-0.0583968	-6.44976	18	22	9	3UTR		1	1
hsa-miR-125a-5p	NM_015178	RHOBTB2	(((((((..((((((..(((((((&))))))).))))))....))))))).	5367	5393	1	-27.2	1	0.00161298	0.471	-0.0575985	0.479269	-7.54065	20	26	7	3UTR		1	1
hsa-miR-125a-5p	NM_015257	NEMP1	..(((...(((((((((.((((((&)))))))))))))))...))).	2943	2965	1	-22.8	1	0.0390671	0.588	0.373057	0.44992	-10.7153	18	22	15	3UTR		1	1
hsa-miR-125a-5p	NM_015299	KHNYN	.((((..((((((((((((((...&))))..))))))))))..)))).	6628	6651	1	-23.6	1	8.26e-07	0.426	3.69415	2.35756	-7.23797	18	23	10	3UTR		1	1
hsa-miR-125a-5p	NM_015995	KLF13	(((((...(((((((..(((((..&)))))..))))))).....))))).	3793	3818	1	-26.4	1	0.0351424	0.412	1.94167	1.5558	-9.9289	17	25	7	3UTR	MIRT005339	1	1
hsa-miR-125a-5p	NM_016097	IER3IP1	..((((.(.(((((....((((((&)))))))))))))))).	2100	2117	1	-19.9	1	0.0087566	0.544	-0.0577322	0.268126	-8.52558	16	17	16	3UTR		1	1
hsa-miR-125a-5p	NM_017590	ZC3H7B	(((((((((((((((.........&))))))))))))))).	5171	5187	1	-25.4	1	1.32e-05	0.471	-0.221908	1.14907	-4.17062	15	16	15	3UTR		1	1
hsa-miR-125a-5p	NM_017811	UBE2R2	(((((((..(((....((((((..&))).))))))..))))))).	1894	1914	1	-21.7	1	0.00494306	0.485	2.19206	1.28717	-10.4221	16	20	7	3UTR		1	1
hsa-miR-125a-5p	NM_017813	BPNT2	((((((..(((((((..((((...&.)))).)))))))..)))))).	4767	4811	1	-27	1	0.0958202	0.471	0.642268	0.62542	-8.02794	17	22	7	3UTR		1	1
hsa-miR-125a-5p	NM_017813	BPNT2	.((((((((.((((.((((.....&)))).)))))))))))).	2164	2182	1	-22.3	1	0.0418199	0.647	-0.758689	-0.153525	-5.77128	16	18	12	3UTR		1	1
hsa-miR-125a-5p	NM_017902	HIF1AN	(((((...(((((((((((((((.&)))))))..............))))))))...))))).	3143	3181	1	-28.5	1	0.0659233	0.471	-0.181266	0.120222	-9.69585	20	38	8	3UTR		1	1
hsa-miR-125a-5p	NM_017913	CDC37L1	((((((((((((......(((((.&)))))...)))...))))))))).	1969	1993	1	-23.3	1	0.000364749	0.632	1.11839	0.534477	-7.05204	17	24	9	3UTR		1	1
hsa-miR-125a-5p	NM_018046	AGGF1	.(((((((((..((((..((((((&))))))...))))))))))))).	4238	4261	1	-20.2	1	0.000837168	0.632	0.916069	0.329107	-9.9649	19	23	13	3UTR		1	1
hsa-miR-125a-5p	NM_018488	TBX4	((((((((((((((((((((((((&)))))))........................)))))))))))).................))))).	2309	2375	1	-23.1	1	3.04e-05	0.632	0.245716	0.409251	-3.93757	24	66	12	3UTR		1	1
hsa-miR-125a-5p	NM_018660	ZNF395	((((((((.(((((..........&))))))))))))).	3117	3131	1	-22.4	1	2.89e-09	0.368	-0.0871528	2.95609	-5.96246	13	14	13	3UTR		1	1
hsa-miR-125a-5p	NM_020225	STOX2	((((((((.((((..(((.((((.&)))).))).)))))))))))).	8984	9006	1	-24.2	1	4.34e-05	0.559	0.723146	0.071184	-6.58625	19	22	12	3UTR	MIRT546391	1	1
hsa-miR-125a-5p	NM_020676	ABHD6	..((((((((((.....(((((.(&).)))))..)))))))..))).	1841	1863	1	-20.5	1	3.49e-05	0.603	1.24154	0.530537	-8.07147	16	22	7	3UTR		1	1
hsa-miR-125a-5p	NM_020676	ABHD6	(((((((((.........(((((.&))))).......))))))))).	1222	1244	1	-20.4	1	0.000754533	0.353	3.82607	4.04236	-14.4661	14	22	9	3UTR		1	1
hsa-miR-125a-5p	NM_020737	LRFN2	(((((((((((((...........&)))))...)))))))).	2995	3012	1	-20.7	1	3.24e-05	0.353	0.90817	1.23718	-5.76291	13	17	8	3UTR		1	1
hsa-miR-125a-5p	NM_020883	ZSWIM5	(((((((((((((...((((.(((&))).)))))))))))..)))))).	5539	5563	1	-21.9	1	0.0483929	0.515	2.13814	1.33057	-5.76291	20	24	11	3UTR		1	1
hsa-miR-125a-5p	NM_021012	KCNJ12	..(((((.((((((((..(((((.&)))))))))))))..))))).	2939	2960	1	-22.6	1	0.000119463	0.382	-0.022509	-0.10729	-7.27064	18	21	13	3UTR		1	1
hsa-miR-125a-5p	NM_021161	KCNK10	..(((((.((((((((((((((..&))))))))))).))).))))).	5571	5593	1	-25.4	1	0.00166118	0.456	2.07776	2.92989	-7.27064	19	22	11	3UTR		1	1
hsa-miR-125a-5p	NM_021161	KCNK10	((((((((.((((....((((((.&)))).))....)).)))))))))).	4400	4425	1	-24.5	1	0.0322746	0.574	2.22993	1.37962	-6.8193	18	25	10	3UTR		1	1
hsa-miR-125a-5p	NM_022153	VSIR	(((((((((....(((((((((..&)).))))))).....))))))))).	4184	4209	1	-22.9	1	0.00222105	0.471	1.94709	1.86078	-12.6408	18	25	9	3UTR		1	1
hsa-miR-125a-5p	NM_022374	ATL2	(((((((((.(((((.((......&.)).)))))...))))))))).	2530	2557	1	-19	1	0.000614267	0.735	5.25196	3.50494	-5.41313	16	22	9	3UTR	MIRT021317	1	1
hsa-miR-125a-5p	NM_022832	USP46	.(((((((.(((((...((((.((&))))))....)))..))))))))).	1897	1922	1	-21.9	1	0.000223143	0.529	-0.388548	0.0915738	-5.81821	18	25	9	3UTR		1	1
hsa-miR-125a-5p	NM_024565	CCNJL	..((((((.((((((...((((..&))))..))))))..)))))).	2713	2734	1	-21.8	1	1.82e-05	0.515	0.956563	0.55035	-6.24644	16	21	6	3UTR		1	1
hsa-miR-125a-5p	NM_024577	SH3TC2	((((((((((((...((((((...&.)))))).)))......))))))))).	8367	8400	1	-24	1	0.000535523	0.485	0.114238	-0.0653935	-6.81899	18	27	9	3UTR		1	1
hsa-miR-125a-5p	NM_024923	NUP210	(((((((((((((...........&)).))))))))))).	6152	6167	1	-23	1	0.000570659	0.544	4.42194	3.67823	-5.76291	13	15	11	3UTR		1	1
hsa-miR-125a-5p	NM_002304	LFNG	(((((((((..((((..(((....&)))..)))).))))))))).	1977	1997	1	-22.7	1	0.002299	0.559	2.87078	1.36115	-8.2379	16	20	9	3UTR	MIRT437807	1	1
hsa-miR-125a-5p	NM_002419	MAP3K11	(((((((((((((((((((.((..&.)).)))))).)))..........)))))))))).	3242	3288	1	-26.5	1	0.00078158	0.368	1.10577	1.0304	-3.93757	21	35	10	3UTR		1	1
hsa-miR-125a-5p	NM_002446	MAP3K10	(((((((((((((((..((.(((.&))).))..)))))))...........)))))))).	3661	3696	1	-28.7	1	0.0131488	0.397	1.83006	1.23431	-4.17062	20	35	8	3UTR		1	1
hsa-miR-125a-5p	NM_002481	PPP1R12B	(((((((...((((((((((((..&)))))).))))))))))))).	14051	14072	1	-25.3	1	0.000183165	0.382	-0.654741	-0.519636	-8.55011	19	21	13	3UTR		1	1
hsa-miR-125a-5p	NM_002603	PDE7A	.((((.(((.((((((((((....&.)))).))))))))).)))).	3859	3894	1	-22.5	1	0.0779882	0.515	3.42112	1.69144	-6.93679	17	21	9	3UTR		1	1
hsa-miR-125a-5p	NM_002719	PPP2R5C	.....((((((((((((((.(((.&))).)))......))))))))))).	2236	2261	1	-22.4	1	0.0150379	0.529	0.028995	0.246162	-13.6656	17	25	11	3UTR		1	1
hsa-miR-125a-5p	NM_003032	ST6GAL1	(((((((((((((....((((((.&)))))))))...........))))))).))).	2391	2423	1	-21.7	1	0.0193956	0.574	0.0837436	-0.219619	-5.76291	19	32	9	3UTR		1	1
hsa-miR-125a-5p	NM_003131	SRF	(((((.(((((((....(((((..&)))))..))))))).)).))).	3103	3125	1	-26.6	1	0.00291696	0.368	0.814406	0.97334	-7.66387	17	22	7	3UTR		1	1
hsa-miR-125a-5p	NM_003150	STAT3	.((((((.((((((...((((...&))))..)))))))))))).	4495	4514	1	-23.3	1	0.000361684	0.515	4.37418	4.86834	-7.07546	16	19	12	3UTR	MIRT731625	1	1
hsa-miR-125a-5p	NM_003155	STC1	(((((((((((((((..(((.(..&.).)))...)))))))....)).)))))).	2655	2712	1	-22.8	1	0.000655783	0.456	1.75386	1.89642	-4.17062	19	30	7	3UTR		1	1
hsa-miR-125a-5p	NM_003173	SUV39H1	((((((((((.(((((.((.(((.&))).)).)))))...................)))))))))).	2200	2242	1	-24.6	1	0.00485556	0.426	2.81979	1.18737	-6.76235	20	42	10	3UTR		1	1
hsa-miR-125a-5p	NM_003326	TNFSF4	.(((((((((((((((.((((((.&.)))))).))).)))).........)))))))).	1490	1538	1	-26.9	1	0.000309964	0.559	0.381698	0.249643	-3.79332	21	34	8	3UTR		1	1
hsa-miR-125a-5p	NM_003458	BSN	..((((...(((((((((((((..&))))).)))))))).)))).	15401	15421	1	-22.9	1	4.6e-05	0.485	0.709794	0.854154	-9.87071	17	20	8	3UTR		1	1
hsa-miR-125a-5p	NM_003638	ITGA8	((((((((.((......(((..((&))..))).......)))))))))).	3826	3851	1	-20.6	1	0.0211986	0.618	2.73743	3.24379	-11.4552	15	25	10	3UTR		1	1
hsa-miR-125a-5p	NM_003759	SLC4A4	((((((((.....(((((((.((.&)).))))))).....)))))))).	6806	6830	1	-23.8	1	0.00204266	0.618	2.38144	1.25922	-13.6972	17	24	8	3UTR		1	1
hsa-miR-125a-5p	NM_004091	E2F2	((((((((((((....((((((..&))))))..)))))))..))))).	2238	2261	1	-26.2	1	6.8e-08	0.397	0.644942	0.344101	-7.05204	18	23	7	3UTR		1	1
hsa-miR-125a-5p	NM_004620	TRAF6	((((((((..(((((((((((.((&))))))))).....))))...)))))))).	2378	2408	1	-23.2	1	0.000958061	0.676	0.0291903	-0.113864	-6.23647	21	30	9	3UTR	MIRT438046	1	1
hsa-miR-125a-5p	NM_004756	NUMBL	((((((((.(((((((.(((((..&))))).)))))))..........)))))))).	2354	2386	1	-25.1	1	0.00430222	0.338	4.60806	3.86838	-4.99396	20	32	8	3UTR		1	1
hsa-miR-125a-5p	NM_004756	NUMBL	..((((.((((((((..((.(((.&))).)).)))))))))))).	2640	2660	1	-24.9	1	0.00016508	0.324	1.44337	2.30112	-6.73374	17	20	12	3UTR		1	1
hsa-miR-125a-5p	NM_004947	DOCK3	...(((((.((((((.((((((((&)))))))).))))))))))).	8342	8363	1	-26.1	1	0.00237857	0.603	0.258895	0.199681	-7.80398	19	21	11	3UTR	MIRT437588	1	1
hsa-miR-125a-5p	NM_005158	ABL2	.(((((((.(((....(((((((.&)))))))))).))))))).	9399	9418	1	-22.7	1	1.94e-06	0.441	3.11006	2.80672	-7.96418	17	19	10	3UTR	MIRT732714	1	1
hsa-miR-125a-5p	NM_005224	ARID3A	((((((((((((((.(((((....&.)))))...))).))))))))))).	2649	2679	1	-24.7	1	0.0118542	0.706	0.745753	1.29564	-4.67302	19	25	11	3UTR	MIRT735258	1	1
hsa-miR-125a-5p	NM_005397	PODXL	(((((.((.((((((..((((...&))))..))))))))))))).	3647	3667	1	-22.9	1	0.0159585	0.471	0.332758	0.0729411	-7.12797	17	20	13	3UTR		1	1
hsa-miR-125a-5p	NM_005439	MLF2	((((((((((((((..........&)))))))))))))).	943	958	1	-27.3	1	9.88e-10	0.353	3.76085	4.46726	-4.90607	14	15	14	3UTR		1	1
hsa-miR-125a-5p	NM_005504	BCAT1	(((((..((((....(((((.(((&))))))))...)))).))))).	8049	8071	1	-20.1	1	0.0071763	0.676	2.40381	3.03126	-13.6104	17	22	8	3UTR		1	1
hsa-miR-125a-5p	NM_005596	NFIB	....(((((((((((..(((.(((&.))).))).))))))))))).	3589	3627	1	-20.5	1	0.000804706	0.662	-0.0561146	0.483115	-9.77961	17	21	11	3UTR		1	1
hsa-miR-125a-5p	NM_006114	TOMM40	((((((((.((((((..(((.((.&.)).)))..)))).)).........)))))))).	1413	1463	1	-23.4	1	0.00200838	0.338	1.17405	0.2659	-5.22701	19	34	8	3UTR		1	1
hsa-miR-125a-5p	NM_006763	BTG2	(((((((.(((((((..((((((.&))))))))))))...).))))))).	822	847	1	-21.3	1	0.00379655	0.412	0.535174	0.862871	-6.48426	20	25	12	3UTR	MIRT061545	1	1
hsa-miR-125a-5p	NM_007372	DDX42	.((((((((((((...(((.....&)))....))).))))))))).	3145	3166	1	-24.4	1	0.0101726	0.544	2.40039	1.01872	-5.61866	15	21	9	3UTR		1	1
hsa-miR-125a-5p	NM_012214	MGAT4A	.(((((((((((....(((.....&.))))))).))))))).	4767	4810	1	-21.7	1	4.75e-06	0.471	-0.0706696	-0.19336	-6.90779	14	17	7	3UTR		1	1
hsa-miR-125a-5p	NM_012234	RYBP	((((((((((((((..........&.)))))))))))))).	3010	3051	1	-28.1	1	0.000150275	0.691	1.25546	1.69007	-4.90607	14	16	14	3UTR		1	1
hsa-miR-125a-5p	NM_012296	GAB2	(((((((..((((....(((((..&.)))))...))))..))))))).	4219	4258	1	-29.1	1	0.0142027	0.426	5.71815	4.68399	-9.13294	16	23	7	3UTR		1	1
hsa-miR-125a-5p	NM_012296	GAB2	..(((((((((((((..(((((..&))))).)))).......))))))))).	5567	5594	1	-25.3	1	0.000696182	0.412	3.17635	3.27848	-5.19005	18	27	9	3UTR		1	1
hsa-miR-125a-5p	NM_014112	TRPS1	.(((((.((((((((..(((((..&)))).)..))))........))))))))).	4897	4927	1	-20.4	1	0.00391808	0.529	0.783568	1.71079	-5.57006	18	30	9	3UTR	MIRT437585	1	1
hsa-miR-125a-5p	NM_001320126	ABHD6	..((((((((((.....(((((.(&).)))))..)))))))..))).	1906	1928	1	-20.5	1	3.49e-05	0.603	0.148504	0.549696	-8.07147	16	22	7	3UTR		1	1
hsa-miR-125a-5p	NM_001320126	ABHD6	(((((((((.........(((((.&))))).......))))))))).	1287	1309	1	-20.4	1	0.000754533	0.353	4.20382	0.829711	-14.4661	14	22	9	3UTR		1	1
hsa-miR-125a-5p	NM_001321120	TBX4	((((((((((((((((((((((((&)))))))........................)))))))))))).................))))).	2468	2534	1	-23.1	1	3.04e-05	0.632	0.245716	0.409251	-3.93757	24	66	12	3UTR		1	1
hsa-miR-125a-5p	NM_001322462	SH3BP5L	.(((((((..(((((((((((((.&)))))))))))))....................))))))).	3687	3728	1	-27.2	1	1.25e-05	0.426	0.706549	0.622511	-6.09222	20	41	13	3UTR	MIRT443832	1	1
hsa-miR-125a-5p	NM_001324216	ELAVL4	..(((((((((((.(((..((((.&))))))).)).))))))))).	752	773	1	-21	1	0.00777205	0.588	0.440398	0.382685	-5.81384	18	21	9	3UTR		1	1
hsa-miR-125a-5p	NM_001330451	ETS1	.((((((((..(((..(((((.((&)).))))))))..)))))))).	3224	3246	1	-21.4	1	0.000429533	0.588	1.50781	0.473084	-8.8291	18	22	8	3UTR		1	1
hsa-miR-125a-5p	NM_001330458	ATL2	(((((((((.(((((.((......&.)).)))))...))))))))).	1808	1835	1	-19	1	0.000614267	0.735	0.875126	1.45497	-5.41313	16	22	9	3UTR	MIRT021317	1	1
hsa-miR-125a-5p	NM_001330461	ATL2	(((((((((.(((((.((......&.)).)))))...))))))))).	2300	2327	1	-19	1	0.000614267	0.735	1.43331	1.70615	-5.41313	16	22	9	3UTR	MIRT021317	1	1
hsa-miR-125a-5p	NM_001330599	TRPS1	.(((((.((((((((..(((((..&)))).)..))))........))))))))).	4739	4769	1	-20.4	1	0.00391808	0.529	2.24635	1.45921	-5.57006	18	30	9	3UTR	MIRT437585	1	1
hsa-miR-125a-5p	NM_001330622	ZNF460	(((((((((........(((((((&)))))).)........))))))))).	2125	2151	1	-20	1	0.00132606	0.618	0.0200367	-0.294302	-14.4661	16	26	9	3UTR		1	1
hsa-miR-125a-5p	NM_001331029	PPP1R12B	(((((((...((((((((((((..&)))))).))))))))))))).	14234	14255	1	-25.3	1	0.000183165	0.382	-0.654741	-0.519636	-8.55011	19	21	13	3UTR		1	1
hsa-miR-125a-5p	NM_001346744	CBX7	(((((..(((((((((((((.((.&)).))))........)))))))))..))))).	2699	2731	1	-25.5	1	0.0171042	0.485	-0.113543	-0.061883	-7.38222	20	32	9	3UTR		1	1
hsa-miR-125a-5p	NM_001350973	PLEKHA8	(((((((((((((...........&.))))))).)))))).	2220	2243	1	-19.7	1	0.00156304	0.632	0.0650835	0.00216239	-5.76291	13	16	7	3UTR		1	1
hsa-miR-125a-5p	NM_001350974	PLEKHA8	(((((((((((((...........&.))))))).)))))).	2158	2181	1	-19.7	1	0.00156304	0.632	0.0650835	0.00216239	-5.76291	13	16	7	3UTR		1	1
hsa-miR-125a-5p	NM_001351156	BAZ2A	((((((...(((((...((((((.&)))))).))))).....)))))).	8725	8749	1	-24.2	1	0.00568764	0.456	0.452012	0.723876	-9.81978	17	24	6	3UTR		1	1
hsa-miR-125a-5p	NM_001357857	ATXN1	(((((((..(((((((.((((((.&)))))).)))))))..))))))).	4192	4216	1	-27.5	1	0.00223547	0.324	0.187746	0.276437	-7.3076	20	24	7	3UTR	MIRT021312	1	1
hsa-miR-125a-5p	NM_001369460	NFIB	....(((((((((((..(((.(((&.))).))).))))))))))).	3809	3847	1	-20.5	1	0.000804706	0.662	0.937979	1.04425	-9.77961	17	21	11	3UTR		1	1
hsa-miR-125a-5p	NM_001369461	NFIB	....(((((((((((..(((.(((&.))).))).))))))))))).	3995	4033	1	-20.5	1	0.000804706	0.662	0.0136462	0.106625	-9.77961	17	21	11	3UTR		1	1
hsa-miR-125a-5p	NM_001369464	NFIB	....(((((((((((..(((.(((&.))).))).))))))))))).	3773	3811	1	-20.5	1	0.000804706	0.662	1.65303	0.987901	-9.77961	17	21	11	3UTR		1	1
hsa-miR-125a-5p	NM_001369466	NFIB	....(((((((((((..(((.(((&.))).))).))))))))))).	3560	3598	1	-20.5	1	0.000804706	0.662	0.0746875	0.385995	-9.77961	17	21	11	3UTR		1	1
hsa-miR-125a-5p	NM_001369467	NFIB	....(((((((((((..(((.(((&.))).))).))))))))))).	3229	3267	1	-20.5	1	0.000804706	0.662	0.948037	0.870945	-9.77961	17	21	11	3UTR		1	1
hsa-miR-125a-5p	NM_001369470	NFIB	....(((((((((((..(((.(((&.))).))).))))))))))).	3495	3533	1	-20.5	1	0.000804706	0.662	0.667655	0.31885	-9.77961	17	21	11	3UTR		1	1
hsa-miR-125a-5p	NM_001369472	NFIB	....(((((((((((..(((.(((&.))).))).))))))))))).	3471	3509	1	-20.5	1	0.000804706	0.662	0.763575	0.457936	-9.77961	17	21	11	3UTR		1	1
hsa-miR-125a-5p	NM_001369476	NFIB	....(((((((((((..(((.(((&.))).))).))))))))))).	3140	3178	1	-20.5	1	0.000804706	0.662	1.70784	0.935408	-9.77961	17	21	11	3UTR		1	1
hsa-miR-125a-5p	NM_001369512	STAT3	.((((((.((((((...((((...&))))..)))))))))))).	4498	4517	1	-23.3	1	0.000361684	0.515	4.37418	4.86834	-7.07546	16	19	12	3UTR	MIRT731625	1	1
hsa-miR-125a-5p	NM_001369518	STAT3	.((((((.((((((...((((...&))))..)))))))))))).	4451	4470	1	-23.3	1	0.000361684	0.515	4.28095	5.00536	-7.07546	16	19	12	3UTR	MIRT731625	1	1
hsa-miR-125a-5p	NM_001371194	SEMA4D	((((((((((((....(((((((.&))).))))))))))).....))))).	3942	3968	1	-21.5	1	0.0729219	0.426	1.93378	1.21102	-7.05204	19	26	11	3UTR		1	1
hsa-miR-125a-5p	NM_001377405	ATXN7	(((((((((((((.....(((((.&))))).....)))............)))))))))).	4666	4702	1	-21.3	1	0.0116037	0.632	2.24542	0.906618	-5.76291	18	36	10	3UTR		1	1
hsa-miR-125a-5p	NM_001377406	ATXN7	(((((((((((((.....(((((.&))))).....)))............)))))))))).	4345	4381	1	-21.3	1	0.0116037	0.632	2.24542	0.906618	-5.76291	18	36	10	3UTR		1	1
hsa-miR-125a-5p	NM_001382225	MLF2	((((((((((((((..........&)))))))))))))).	1333	1348	1	-27.3	1	9.88e-10	0.353	5.28549	4.43628	-4.90607	14	15	14	3UTR		1	1
hsa-miR-125a-5p	NM_001382226	MLF2	((((((((((((((..........&)))))))))))))).	1111	1126	1	-27.3	1	9.88e-10	0.353	5.28549	4.43628	-4.90607	14	15	14	3UTR		1	1
hsa-miR-125a-5p	NM_001384	DPH2	((((((((.(((((((..((((.(&.).))))..))))))))))))))).	1819	1872	1	-24.5	1	0.0154698	0.471	0.124402	0.050281	-4.99396	20	25	15	3UTR		1	1
hsa-miR-125a-5p	NM_001410	MEGF8	.(((((((((((.....((((((.&)))))).....)))......)))))))).	9576	9605	1	-25.9	1	7.97e-05	0.515	0.375773	-0.0952912	-6.90779	17	29	8	3UTR		1	1
hsa-miR-125a-5p	NM_001655	ARCN1	..((((((.((((((((((((((.&))).))))).......)))))))))))).	3607	3636	1	-21.1	1	7.13e-05	0.559	1.55466	1.43987	-6.01339	20	29	12	3UTR		1	1
hsa-miR-125a-5p	NM_000333	ATXN7	(((((((((((((.....(((((.&))))).....)))............)))))))))).	4840	4876	1	-21.3	1	0.0116037	0.632	2.24542	0.906618	-5.76291	18	36	10	3UTR		1	1
hsa-miR-125a-5p	NM_000514	GDNF	..(((((((((((...((((.((.&)).)))))))))))..)))).	2778	2799	1	-23.8	1	2.79e-05	0.353	1.793	0.71065	-6.78234	17	21	11	3UTR		1	1
hsa-miR-125a-5p	NM_001008222	ZDHHC9	(((((..(((((((..((((.(..&).)))))))))))...))))).	3059	3081	1	-21.8	1	0.0612345	0.485	3.13906	1.96965	-8.35072	17	22	11	3UTR	MIRT045775	1	1
hsa-miR-125a-5p	NM_001010887	ACER2	((((((((.(((((((........&.))))))))))))))).	1307	1339	1	-22.8	1	0.00383542	0.559	-0.558949	-0.320505	-4.99396	15	17	15	3UTR		1	1
hsa-miR-125a-5p	NM_001010898	SLC6A17	(((((...((((((((((((((..&))))))))))))))))))).	4139	4159	1	-24.7	1	0.279773	0.426	-0.577894	-0.195786	-9.69585	19	20	19	3UTR		1	1
hsa-miR-125a-5p	NM_001018111	PODXL	(((((.((.((((((..((((...&))))..))))))))))))).	3743	3763	1	-22.9	1	0.0159585	0.471	0.127798	-0.247157	-7.12797	17	20	13	3UTR		1	1
hsa-miR-125a-5p	NM_001039589	DPH2	((((((((.(((((((..((((.(&.).))))..))))))))))))))).	1135	1188	1	-24.5	1	0.0154698	0.471	0.124402	0.050281	-4.99396	20	25	15	3UTR		1	1
hsa-miR-125a-5p	NM_001039690	CHTF8	..(((((((((((((((((((...&.))))))))))))))))..))).	911	958	1	-31.3	1	2.36e-07	0.368	1.70832	1.84236	-4.957	19	23	16	3UTR		1	1
hsa-miR-125a-5p	NM_001039960	SLC4A8	((((((.((((((((..(((((..&.))))))))))).)))))))).	4156	4185	1	-25.4	1	0.0306826	0.559	-0.0548624	0.268125	-5.71431	19	22	11	3UTR		1	1
hsa-miR-125a-5p	NM_001040146	CHTF8	..(((((((((((((((((((...&.))))))))))))))))..))).	877	924	1	-31.3	1	2.36e-07	0.368	1.91362	1.7211	-4.957	19	23	16	3UTR		1	1
hsa-miR-125a-5p	NM_001040167	LFNG	(((((((((..((((..(((....&)))..)))).))))))))).	2364	2384	1	-22.7	1	0.002299	0.559	2.87078	1.36115	-8.2379	16	20	9	3UTR	MIRT437807	1	1
hsa-miR-125a-5p	NM_001066	TNFRSF1B	..((((((((((((((((((((..&.))))))))))))).................))))))).	3031	3100	1	-30.5	1	7.59e-05	0.471	-0.171903	-0.170906	-4.957	20	39	13	3UTR		1	1
hsa-miR-125a-5p	NM_001080825	TMEM120B	...(((((((((((((((((....&.))))))..))))))))))).	3344	3386	1	-26.7	1	0.000149577	0.397	0.205074	-0.0493132	-6.51454	17	21	11	3UTR		1	1
hsa-miR-125a-5p	NM_001098484	SLC4A4	((((((((.....(((((((.((.&)).))))))).....)))))))).	6853	6877	1	-23.8	1	0.00204266	0.618	2.38144	1.25922	-13.6972	17	24	8	3UTR		1	1
hsa-miR-125a-5p	NM_001099270	ZBTB34	..(((((((((((..(((.(((..&))).)))..))))))))))).	3841	3862	1	-21.6	1	0.000904771	0.662	3.85824	1.88025	-6.54929	17	21	11	3UTR		1	1
hsa-miR-125a-5p	NM_001099287	NIPAL4	((((((((((..............&)))))))))).	1929	1940	1	-19.3	1	0.000469819	0.529	2.03956	0.506362	-13.2236	10	11	10	3UTR		1	1
hsa-miR-125a-5p	NM_001102575	SNX18	((..((((((((((((........&))))))))))))..)).	2397	2414	1	-20.2	1	0.00187351	0.515	3.14691	3.20103	-8.52714	14	17	12	3UTR		1	1
hsa-miR-125a-5p	NM_001110514	EBF4	((((((((..(((((..(((....&)))..)))))....)))))))).	2434	2457	1	-22.3	1	0.000250284	0.426	2.24287	0.472579	-6.46952	16	23	8	3UTR		1	1
hsa-miR-125a-5p	NM_001114600	SZRD1	.(((((((((((((...((((((.&))))))))))))))))).)).	1000	1021	1	-23.2	1	0.0269284	0.662	2.26855	2.2341	-4.76182	19	21	17	3UTR		1	1
hsa-miR-125a-5p	NM_001114600	SZRD1	..((((.(((((((((.(((.((.&)).)))...))))))))))))).	3010	3033	1	-22.6	1	8.07e-07	0.426	2.70052	2.66949	-6.50069	18	23	13	3UTR		1	1
hsa-miR-125a-5p	NM_001127211	SHTN1	.((((((((((((((((((.((((&))))...))))...))))))))))..........)))).	4044	4083	1	-20.7	1	1.21e-08	0.456	0.549343	0.744563	-3.79332	22	39	10	3UTR		1	1
hsa-miR-125a-5p	NM_001127671	LIFR	((((((((((...((.(((((((.&)))).))))).)))))))))).	8182	8204	1	-20.7	1	0.011073	0.647	2.43869	1.94615	-11.6313	19	22	10	3UTR	MIRT053792	1	1
hsa-miR-125a-5p	NM_001128149	ATXN7	(((((((((((((.....(((((.&))))).....)))............)))))))))).	3947	3983	1	-21.3	1	0.0116037	0.632	2.24542	0.906618	-5.76291	18	36	10	3UTR		1	1
hsa-miR-125a-5p	NM_001128164	ATXN1	(((((((..(((((((.((((((.&)))))).)))))))..))))))).	4143	4167	1	-27.5	1	0.00223547	0.324	0.492311	0.0928533	-7.3076	20	24	7	3UTR	MIRT021312	1	1
hsa-miR-125a-5p	NM_001128916	TOMM40	((((((((.((((((..(((.((.&.)).)))..)))).)).........)))))))).	1416	1466	1	-23.4	1	0.00200838	0.338	0.373212	0.454897	-5.22701	19	34	8	3UTR		1	1
hsa-miR-125a-5p	NM_001128917	TOMM40	((((((((.((((((..(((.((.&.)).)))..)))).)).........)))))))).	1508	1558	1	-23.4	1	0.00200838	0.338	1.17405	0.2659	-5.22701	19	34	8	3UTR		1	1
hsa-miR-125a-5p	NM_001130963	NEMP1	..(((...(((((((((.((((((&)))))))))))))))...))).	3162	3184	1	-22.8	1	0.0390671	0.588	0.539061	0.029719	-10.7153	18	22	15	3UTR		1	1
hsa-miR-125a-5p	NM_001134223	USP46	.(((((((.(((((...((((.((&))))))....)))..))))))))).	1954	1979	1	-21.9	1	0.000223143	0.529	-0.031826	0.0610867	-5.81821	18	25	9	3UTR		1	1
hsa-miR-125a-5p	NM_001135005	DNAJB5	((((((...((((((.((((.(((&))).)))))))))))))))).	2303	2324	1	-23.6	1	0.00034119	0.441	0	0	-9.08433	19	21	16	3UTR		1	1
hsa-miR-125a-5p	NM_001136264	DAZAP2	(((((((((..(((.(((((....&))))).)))....))))))))).	1582	1605	1	-19.6	1	0.0146599	0.706	1.08562	0.623363	-8.7403	17	23	9	3UTR		1	1
hsa-miR-125a-5p	NM_001136264	DAZAP2	.......(((((((((((((....&))))))).)))))).	1516	1531	1	-18.7	0	0.000290909	0.574	1.36244	0.744881	-17.1102	13	15	7	3UTR		1	1
hsa-miR-125a-5p	NM_001136266	DAZAP2	(((((((((..(((.(((((....&))))).)))....))))))))).	1571	1594	1	-19.6	1	0.0146599	0.706	3.8006	1.88586	-8.7403	17	23	9	3UTR		1	1
hsa-miR-125a-5p	NM_001136266	DAZAP2	.......(((((((((((((....&))))))).)))))).	1505	1520	1	-18.7	0	0.000290909	0.574	0.761889	1.02404	-17.1102	13	15	7	3UTR		1	1
hsa-miR-125a-5p	NM_001136267	DAZAP2	(((((((((..(((.(((((....&))))).)))....))))))))).	1552	1575	1	-19.6	1	0.0146599	0.706	3.8006	1.88586	-8.7403	17	23	9	3UTR		1	1
hsa-miR-125a-5p	NM_001136267	DAZAP2	.......(((((((((((((....&))))))).)))))).	1486	1501	1	-18.7	0	0.000290909	0.574	0.761889	1.02404	-17.1102	13	15	7	3UTR		1	1
hsa-miR-125a-5p	NM_001136268	DAZAP2	(((((((((..(((.(((((....&))))).)))....))))))))).	1402	1425	1	-19.6	1	0.0146599	0.706	3.8006	1.88586	-8.7403	17	23	9	3UTR		1	1
hsa-miR-125a-5p	NM_001136268	DAZAP2	.......(((((((((((((....&))))))).)))))).	1336	1351	1	-18.7	0	0.000290909	0.574	0.761889	1.02404	-17.1102	13	15	7	3UTR		1	1
hsa-miR-125a-5p	NM_001136482	C19orf38	((((((((((((((((....(((.&)))...)))))))................))))))))).	847	886	1	-21.8	1	0.00413946	0.441	0.0125646	-0.321835	-3.93757	19	39	9	3UTR		1	1
hsa-miR-125a-5p	NM_001142281	ARCN1	..((((((.((((((((((((((.&))).))))).......)))))))))))).	3343	3372	1	-21.1	1	7.13e-05	0.559	1.11881	1.52535	-6.01339	20	29	12	3UTR		1	1
hsa-miR-125a-5p	NM_001142348	SCN4B	..((((((.((((((((((((.((&.)))))))))..))))).)))))).	1106	1152	1	-24.9	1	2.39e-06	0.353	0.381024	-0.063196	-6.01339	20	25	9	3UTR		1	1
hsa-miR-125a-5p	NM_001142349	SCN4B	..((((((.((((((((((((.((&.)))))))))..))))).)))))).	1501	1547	1	-24.9	1	2.39e-06	0.353	0.601708	0.80688	-6.01339	20	25	9	3UTR		1	1
hsa-miR-125a-5p	NM_001142386	PDK3	((((((((((((((..(((((((.&.)))))))..))))...........)))))))))).	3007	3054	1	-27.8	1	3.52e-05	0.515	-0.412099	0.0455995	-4.90607	21	36	10	3UTR		1	1
hsa-miR-125a-5p	NM_001143820	ETS1	.((((((((..(((..(((((.((&)).))))))))..)))))))).	3386	3408	1	-21.4	1	0.000429533	0.588	1.20822	0.510752	-8.8291	18	22	8	3UTR		1	1
hsa-miR-125a-5p	NM_001145365	ZNF652	((((((((.((((.(..(((((((&)))))))..).)))).))....)))))).	3384	3413	1	-25.3	1	0.000176188	0.574	-0.583608	-0.0593359	-6.08385	20	29	7	3UTR		1	1
hsa-miR-125a-5p	NM_001160036	RHOBTB2	(((((((..((((((..(((((((&))))))).))))))....))))))).	5314	5340	1	-27.2	1	0.00161298	0.471	-0.0575985	0.479269	-7.54065	20	26	7	3UTR		1	1
hsa-miR-125a-5p	NM_001160037	RHOBTB2	(((((((..((((((..(((((((&))))))).))))))....))))))).	4851	4877	1	-27.2	1	0.00161298	0.471	-0.0575985	0.479269	-7.54065	20	26	7	3UTR		1	1
hsa-miR-125a-5p	NM_001161726	PPP2R5C	.....((((((((((((((.(((.&))).)))......))))))))))).	2361	2386	1	-22.4	1	0.0150379	0.529	0.028995	0.246162	-13.6656	17	25	11	3UTR		1	1
hsa-miR-125a-5p	NM_001162422	ETS1	.((((((((..(((..(((((.((&)).))))))))..)))))))).	2837	2859	1	-21.4	1	0.000429533	0.588	1.14948	1.73289	-8.8291	18	22	8	3UTR		1	1
hsa-miR-125a-5p	NM_001164440	ANKRD33B	..((((((.((((....((((((.&))))))...)))))))))).	6085	6105	1	-28.1	1	5.55e-12	0.368	-0.435076	-0.259402	-7.83873	16	20	10	3UTR	MIRT256244	1	1
hsa-miR-125a-5p	NM_001164440	ANKRD33B	..(((((((((......((((((.&))))))......))))))))).	5435	5457	1	-27.5	1	8.07e-05	0.353	-0.361235	-0.177791	-11.4183	15	22	9	3UTR	MIRT256244	1	1
hsa-miR-125a-5p	NM_001166355	LFNG	(((((((((..((((..(((....&)))..)))).))))))))).	2189	2209	1	-22.7	1	0.002299	0.559	2.87078	1.36115	-8.2379	16	20	9	3UTR	MIRT437807	1	1
hsa-miR-125a-5p	NM_001167858	PPP1R12B	(((((.(.(((((((...((((..&))))....))))))).).))))).	1500	1524	1	-23.1	1	0.000272608	0.588	0.314267	1.80249	-8.38522	17	24	7	3UTR		1	1
hsa-miR-125a-5p	NM_001170765	LCOR	.((((..((((((((.((((.((.&)).)))))))))))).)))).	7582	7603	1	-22.7	1	0.00108671	0.441	0.764306	2.38633	-7.47102	18	21	12	3UTR		1	1
hsa-miR-125a-5p	NM_001170766	LCOR	.((((..((((((((.((((.((.&)).)))))))))))).)))).	5005	5026	1	-22.7	1	0.00108671	0.441	0.764306	2.38633	-7.47102	18	21	12	3UTR		1	1
hsa-miR-125a-5p	NM_001172292	NIPAL4	((((((((((..............&)))))))))).	2066	2077	1	-19.3	1	0.000469819	0.529	2.03956	0.506362	-13.2236	10	11	10	3UTR		1	1
hsa-miR-125a-5p	NM_001172638	ZFP62	(((((((((((.(((..((((...&.))))..)))..))))))))))).	3172	3239	1	-26.4	1	0.00192345	0.662	2.32213	1.97727	-7.51743	18	24	11	3UTR		1	1
hsa-miR-125a-5p	NM_001177387	ATXN7	(((((((((((((.....(((((.&))))).....)))............)))))))))).	4441	4477	1	-21.3	1	0.0116037	0.632	2.24542	0.906618	-5.76291	18	36	10	3UTR		1	1
hsa-miR-125a-5p	NM_001178091	BCAT1	(((((..((((....(((((.(((&))))))))...)))).))))).	7938	7960	1	-20.1	1	0.0071763	0.676	0.541647	0.505289	-13.6104	17	22	8	3UTR		1	1
hsa-miR-125a-5p	NM_001178092	BCAT1	(((((..((((....(((((.(((&))))))))...)))).))))).	7866	7888	1	-20.1	1	0.0071763	0.676	1.1693	0.63924	-13.6104	17	22	8	3UTR		1	1
hsa-miR-125a-5p	NM_001178093	BCAT1	(((((..((((....(((((.(((&))))))))...)))).))))).	7995	8017	1	-20.1	1	0.0071763	0.676	2.37869	1.49953	-13.6104	17	22	8	3UTR		1	1
hsa-miR-125a-5p	NM_001178094	BCAT1	(((((..((((....(((((.(((&))))))))...)))).))))).	8134	8156	1	-20.1	1	0.0071763	0.676	1.55334	2.7868	-13.6104	17	22	8	3UTR		1	1
hsa-miR-125a-5p	NM_001190468	GDNF	..(((((((((((...((((.((.&)).)))))))))))..)))).	2437	2458	1	-23.8	1	2.79e-05	0.353	0.322825	0.790066	-6.78234	17	21	11	3UTR		1	1
hsa-miR-125a-5p	NM_001190469	GDNF	..(((((((((((...((((.((.&)).)))))))))))..)))).	2359	2380	1	-23.8	1	2.79e-05	0.353	0.0444193	0.43891	-6.78234	17	21	11	3UTR		1	1
hsa-miR-125a-5p	NM_001190737	NFIB	....(((((((((((..(((.(((&.))).))).))))))))))).	3906	3944	1	-20.5	1	0.000804706	0.662	0.27525	0.284079	-9.77961	17	21	11	3UTR		1	1
hsa-miR-125a-5p	NM_001190738	NFIB	....(((((((((((..(((.(((&.))).))).))))))))))).	3484	3522	1	-20.5	1	0.000804706	0.662	0.781016	0.278084	-9.77961	17	21	11	3UTR		1	1
hsa-miR-125a-5p	NM_001193288	SLC24A2	((((((((.((((((..(((((((&.)))))))..))))))))))).))).	2914	2952	1	-28.8	1	0.00644221	0.456	-0.272593	0.143632	-5.22701	21	26	11	3UTR		1	1
hsa-miR-125a-5p	NM_001195685	LYPD6	..(((((..((((((((((.((.(&.).)).))).))))))).))))).	3139	3178	1	-21.8	1	0.000611404	0.412	0.963157	0.676936	-8.32703	18	24	7	3UTR		1	1
hsa-miR-125a-5p	NM_001197131	PPP1R12B	(((((((((((((..(((((....&.)))))))))))..))))))).	8342	8379	1	-23	1	0.000103812	0.471	0.554981	1.29049	-5.52986	18	22	11	3UTR		1	1
hsa-miR-125a-5p	NM_001197131	PPP1R12B	((.(((.((((((((..((((...&))))..)))))))).))).)).	3285	3307	1	-22.6	1	2.74e-05	0.544	0.26494	-0.25859	-7.27185	17	22	8	3UTR		1	1
hsa-miR-125a-5p	NM_001201366	DNAL1	((((....(((((((.((((....&)))).))))))))))).	3855	3872	1	-19.7	1	1.11e-07	0.559	-0.0272126	0.178469	-14.0479	15	17	11	3UTR		1	1
hsa-miR-125a-5p	NM_001202403	ASB6	.(((((..(((((((..((((...&))))...))))))).))))).	4440	4461	1	-21.3	1	0.00343029	0.5	0	0	-7.8837	16	21	7	3UTR		1	1
hsa-miR-125a-5p	NM_001204143	MBD1	....((((((((((......(((.&)))....)))))))))).	2191	2209	1	-18.1	1	0.000553207	0.515	1.04291	1.86296	-10.5151	13	18	10	3UTR		1	1
hsa-miR-125a-5p	NM_001204878	BAG4	((((((((.((((((.((((....&.)))).))).))).......)))))))).	2375	2410	1	-21	1	7.74e-05	0.618	0	0	-5.22701	18	29	8	3UTR		1	1
hsa-miR-125a-5p	NM_001205228	SORT1	...((((((((((((..((((.((&))))))..)))))))))))).	6323	6344	1	-21.4	1	4.36e-10	0.5	0	0	-6.74759	18	21	12	3UTR		1	1
hsa-miR-125a-5p	NM_001242318	PDE7A	.((((.(((.((((((((((....&.)))).))))))))).)))).	4385	4412	1	-22.5	1	0.0779882	0.515	0.381573	0.335552	-6.93679	17	21	9	3UTR		1	1
hsa-miR-125a-5p	NM_001243759	USP2	(((((((((..(((...((.....&.))...)))..))))))))).	2440	2471	1	-19.6	1	0.000766564	0.426	2.9406	4.93013	-8.97335	14	21	9	3UTR		1	1
hsa-miR-125a-5p	NM_001243778	PRXL2A	.((((..(((((((..(((.((((&))))..)))..))))))).)))).	4673	4697	1	-23.1	1	0.00208828	0.5	0	0	-8.20647	18	24	7	3UTR		1	1
hsa-miR-125a-5p	NM_001243779	PRXL2A	.((((..(((((((..(((.((((&))))..)))..))))))).)))).	4757	4781	1	-23.1	1	0.00208828	0.5	0	0	-8.20647	18	24	7	3UTR		1	1
hsa-miR-125a-5p	NM_001243780	PRXL2A	.((((..(((((((..(((.((((&))))..)))..))))))).)))).	5188	5212	1	-23.1	1	0.00208828	0.5	0	0	-8.20647	18	24	7	3UTR		1	1
hsa-miR-125a-5p	NM_001243781	PRXL2A	.((((..(((((((..(((.((((&))))..)))..))))))).)))).	4705	4729	1	-23.1	1	0.00208828	0.5	-0.717455	-0.0273609	-8.20647	18	24	7	3UTR		1	1
hsa-miR-125b-5p	NM_001281734	ZFYVE1	.((((((((.(((((.((((((&.))))))....))))).)))))))).	2920	2955	0.961538	-24.9	1	0.00118713	0.471	3.69596	5.38721	-5.26888	19	26	8	3UTR	MIRT046077	1	1
hsa-miR-125b-5p	NM_015434	INTS7	(((((((((.((((((......&)))))).).)))))))).	4132	4150	0.961538	-22	1	0.000607053	0.544	6.21649	5.031	-5.18008	15	18	8	3UTR		1	1
hsa-miR-125b-5p	NM_017913	CDC37L1	.(((((((.((((...((((..&)))))))).))))))).	2556	2573	0.961538	-21	1	7.81e-06	0.485	0.173467	0.473508	-6.67505	15	17	8	3UTR		1	1
hsa-miR-125b-5p	NM_021260	ZFYVE1	.((((((((.(((((.((((((&.))))))....))))).)))))))).	2962	2997	0.961538	-24.9	1	0.00118713	0.471	3.69596	5.38721	-5.26888	19	26	8	3UTR	MIRT046077	1	1
hsa-miR-125b-5p	NM_001199811	INTS7	(((((((((.((((((......&)))))).).)))))))).	4090	4108	0.961538	-22	1	0.000607053	0.544	3.99428	3.53791	-5.18008	15	18	8	3UTR		1	1
hsa-miR-125b-5p	NM_001199812	INTS7	(((((((((.((((((......&)))))).).)))))))).	4072	4090	0.961538	-22	1	0.000607053	0.544	5.77662	5.34212	-5.18008	15	18	8	3UTR		1	1
hsa-miR-125b-5p	NM_002537	OAZ2	.(((((((.((((.....(((.&)))..)))).))))))).	905	923	0.974359	-22.3	1	7.15e-06	0.426	4.13487	3.41131	-6.67505	14	18	7	3UTR		1	1
hsa-miR-125b-5p	NM_001284232	MAP3K9	..(((((((((((((((.((..&.)).))))))).)))))))).	8272	8321	0.980769	-27	1	0.00381912	0.529	5.33535	3.47028	-4.957	17	21	8	3UTR		1	1
hsa-miR-125b-5p	NM_001253912	TBC1D1	(((((((((..(..((((.(..&.).))))..)..))))))))).	3917	3949	1	-20.7	1	3.22e-05	0.471	0.311204	0.777581	-10.1508	15	22	9	3UTR	MIRT006523	1	1
hsa-miR-125b-5p	NM_001253914	TBC1D1	(((((((((..(..((((.(..&.).))))..)..))))))))).	1217	1261	1	-20.7	1	3.22e-05	0.471	0.0327686	0.981868	-10.1508	15	22	9	3UTR	MIRT006523	1	1
hsa-miR-125b-5p	NM_001256821	RIT1	((((((((((((((((((....&))))))))......)))).)))))).	1286	1312	1	-20.1	1	0.000896559	0.603	0.232785	0.100652	-3.93757	18	26	8	3UTR		1	1
hsa-miR-125b-5p	NM_001258298	SHTN1	..((((((((((((........&.))))))).))))).	6253	6272	1	-18	1	0.0243661	0.588	0	0	-5.9255	12	15	7	3UTR		1	1
hsa-miR-125b-5p	NM_001258401	SLC4A8	((((((.((((((..(((((..&.)))))..)))).)))))))).	3994	4023	1	-22.1	1	0.0306826	0.559	-0.593059	-0.00979632	-7.07355	17	22	8	3UTR		1	1
hsa-miR-125b-5p	NM_001258401	SLC4A8	((((((((((((((((.(((..&)))..))))))))...)))...))))).	5688	5716	1	-21.3	1	0.000165257	0.544	-0.212534	-0.381905	-3.93757	19	28	8	3UTR		1	1
hsa-miR-125b-5p	NM_001270520	DAAM1	(((((((((.............&.))))))))).	4499	4516	1	-16.5	1	0.00848407	0.721	2.62677	2.61919	-14.4661	9	11	9	3UTR		1	1
hsa-miR-125b-5p	NM_001270975	IST1	(((((((((..(((........&)))..))))))))).	1819	1834	1	-18.1	1	0.000223219	0.456	3.79713	1.11272	-8.97335	12	15	9	3UTR		1	1
hsa-miR-125b-5p	NM_001270976	IST1	(((((((((..(((........&)))..))))))))).	1972	1987	1	-18.1	1	0.000223219	0.456	3.79713	1.11272	-8.97335	12	15	9	3UTR		1	1
hsa-miR-125b-5p	NM_001270977	IST1	(((((((((..(((........&)))..))))))))).	1726	1741	1	-18.1	1	0.000223219	0.456	3.79713	1.11272	-8.97335	12	15	9	3UTR		1	1
hsa-miR-125b-5p	NM_001270978	IST1	(((((((((..(((........&)))..))))))))).	1447	1462	1	-18.1	1	0.000223219	0.456	3.79713	1.11272	-8.97335	12	15	9	3UTR		1	1
hsa-miR-125b-5p	NM_001270979	IST1	(((((((((..(((........&)))..))))))))).	1401	1416	1	-18.1	1	0.000223219	0.456	3.79713	1.11272	-8.97335	12	15	9	3UTR		1	1
hsa-miR-125b-5p	NM_001271844	TBC1D16	(((((((..((((((((((((.&)))..)))))))))..))))).)).	4362	4387	1	-24.7	1	0.000155348	0.324	-0.0708596	-0.580277	-7.3076	19	25	9	3UTR		1	1
hsa-miR-125b-5p	NM_001271845	TBC1D16	(((((((..((((((((((((.&)))..)))))))))..))))).)).	4401	4426	1	-24.7	1	0.000155348	0.324	-0.546625	-0.476711	-7.3076	19	25	9	3UTR		1	1
hsa-miR-125b-5p	NM_001271869	SZRD1	.((((((((((((..(((((..&))).))..)))))))))).)).	996	1018	1	-20.5	1	0.0269284	0.662	2.32188	2.27403	-5.38561	17	22	10	3UTR		1	1
hsa-miR-125b-5p	NM_001281517	CEP85	(((((((((((((.........&)).)))))))).))).	2364	2380	1	-18.9	1	5.55e-05	0.412	0.212111	0.392895	-5.76291	13	16	8	3UTR		1	1
hsa-miR-125b-5p	NM_001281518	CEP85	(((((((((((((.........&)).)))))))).))).	976	992	1	-18.9	1	5.55e-05	0.412	0.212111	0.392895	-5.76291	13	16	8	3UTR		1	1
hsa-miR-125b-5p	NM_001281735	ZFYVE1	.((((((((.(((((.......&))))).)))))))).	1224	1239	1	-20.7	1	0.00118713	0.471	-0.209567	0.927609	-5.26888	13	15	8	3UTR	MIRT046077	1	1
hsa-miR-125b-5p	NM_001282587	H6PD	.(((((((.(((((........&))))).))))))).	8427	8441	1	-21.4	1	2.27e-05	0.382	-0.228222	-0.487897	-5.81821	12	14	7	3UTR		1	1
hsa-miR-125b-5p	NM_001282715	OLFML2A	((((((.(((((.((((.....&.))))))))))))))).	2625	2654	1	-22.7	1	0.00632264	0.426	0.28587	-0.320641	-6.77039	15	17	15	3UTR		1	1
hsa-miR-125b-5p	NM_001282981	TLE3	((((((.((((((..((.....&))..)))).)))))))).	3967	3985	1	-20.3	1	0.000111182	0.368	4.02261	4.11159	-7.07355	14	18	8	3UTR		1	1
hsa-miR-125b-5p	NM_001286210	STX6	((((...(((((((((((.(..&).))))))))))))))).	1646	1664	1	-21.3	1	0.011246	0.574	0.31648	-0.187614	-11.5013	16	18	15	3UTR		1	1
hsa-miR-125b-5p	NM_001286490	FRMD5	(((((((((((((((.((((..&.))))))))))).)))))))).	3332	3374	1	-24.3	1	0.00127567	0.662	3.34723	3.14237	-4.17062	19	22	11	3UTR		1	1
hsa-miR-125b-5p	NM_001287000	ST6GALNAC6	(((((.(((((((.........&))))))).))).)).	1803	1818	1	-19.5	1	4.05e-08	0.426	6.64193	2.79349	-7.66387	12	15	7	3UTR		1	1
hsa-miR-125b-5p	NM_001287001	ST6GALNAC6	(((((.(((((((.........&))))))).))).)).	1873	1888	1	-19.5	1	4.05e-08	0.426	5.99787	3.07692	-7.66387	12	15	7	3UTR		1	1
hsa-miR-125b-5p	NM_001287002	ST6GALNAC6	(((((.(((((((.........&))))))).))).)).	1820	1835	1	-19.5	1	4.05e-08	0.426	3.57322	3.44488	-7.66387	12	15	7	3UTR		1	1
hsa-miR-125b-5p	NM_001287497	TMEM168	(((((((((((((((((((...&))))))))).....)))....))))))).	3882	3911	1	-20.6	1	0.0612679	0.647	0.446031	0.605112	-3.93757	19	29	9	3UTR		1	1
hsa-miR-125b-5p	NM_001289979	NUMBL	..((((.((((((..((((((.&))).)))..)))))))))).	2555	2575	1	-22.4	1	0.00016508	0.324	2.88798	3.19793	-8.09298	16	20	10	3UTR		1	1
hsa-miR-125b-5p	NM_001289984	JADE2	(((((((((((((.........&.))))).....)))))))).	3905	3945	1	-20.6	1	6.99e-05	0.559	2.74531	1.85352	-5.76291	13	20	8	3UTR		1	1
hsa-miR-125b-5p	NM_001290001	ZNF385A	(((((((((((((..(((.(((&.))).)))..))))...........))))))))).	1232	1282	1	-27	1	0.000122728	0.338	2.04952	2.6757	-5.52986	19	35	9	3UTR	MIRT500382	1	1
hsa-miR-125b-5p	NM_001290002	ZNF385A	(((((((((((((..(((.(((&.))).)))..))))...........))))))))).	1557	1607	1	-27	1	0.000122728	0.338	2.35277	2.95667	-5.52986	19	35	9	3UTR	MIRT500382	1	1
hsa-miR-125b-5p	NM_001291993	RUFY3	((((((.((((...........&)))))))))).	2046	2057	1	-17.6	1	0.0531129	0.574	0.626383	0.197273	-11.9425	10	11	10	3UTR		1	1
hsa-miR-125b-5p	NM_001292018	CYTH1	.((((((((((((.........&.))))..)))))))).	2975	3015	1	-19.8	1	0.000156745	0.368	4.32391	5.21195	-5.61866	12	16	8	3UTR		1	1
hsa-miR-125b-5p	NM_001292018	CYTH1	..((((.((((((...((((.(&).))))...)))))))))).	3354	3374	1	-19.4	1	0.000742107	0.441	0.749106	0.74655	-8.32603	15	20	10	3UTR		1	1
hsa-miR-125b-5p	NM_001292019	CYTH1	.((((((((((((.........&.))))..)))))))).	2541	2581	1	-19.8	1	0.000156745	0.368	4.71685	4.97524	-5.61866	12	16	8	3UTR		1	1
hsa-miR-125b-5p	NM_001300727	DTX4	((((((.((((((..(((((..&)))))...)))))))).)))).	3927	3949	1	-20.9	1	0.000319944	0.456	-0.349494	-0.046837	-7.07355	17	22	8	3UTR		1	1
hsa-miR-125b-5p	NM_001300727	DTX4	((((((.(.((((((.((((..&)))).)))))).))))))).	3157	3177	1	-22.2	1	0.00638336	0.426	0.277146	0.400656	-6.7707	17	20	7	3UTR		1	1
hsa-miR-125b-5p	NM_001300926	RNF121	((((((((((((..........&))))))).))))).	2004	2018	1	-19.9	1	0.0407828	0.456	0.0771056	0.0231353	-7.05204	12	14	7	3UTR		1	1
hsa-miR-125b-5p	NM_001313726	ANO3	((((((((((............&.)))))))))).	3737	3759	1	-19.5	1	0.00125819	0.529	0.698937	1.44711	-13.2236	10	12	10	3UTR		1	1
hsa-miR-125b-5p	NM_001313727	ANO3	((((((((((............&.)))))))))).	2927	2949	1	-19.5	1	0.00125819	0.529	0.0176769	0.318161	-13.2236	10	12	10	3UTR		1	1
hsa-miR-125b-5p	NM_030915	LBH	(((((....(((((((((.(..&).))))))).))....))))).	776	798	1	-19.1	1	0.00762985	0.485	0.53933	1.52882	-10.7522	15	22	7	3UTR		1	1
hsa-miR-125b-5p	NM_031418	ANO3	((((((((((............&.)))))))))).	3331	3353	1	-19.5	1	0.00125819	0.529	0.805992	0.108917	-13.2236	10	12	10	3UTR		1	1
hsa-miR-125b-5p	NM_031427	DNAL1	...(((((((((..(((((((.&)))))))......))))))))).	2021	2044	1	-20.7	1	0.000760453	0.676	0.809423	0.3724	-8.66051	16	23	9	3UTR		1	1
hsa-miR-125b-5p	NM_031427	DNAL1	.(((((((((((..........&)))....)))))))).	5218	5234	1	-17.8	1	5.92e-07	0.529	0.567534	0.380681	-6.90779	11	16	8	3UTR		1	1
hsa-miR-125b-5p	NM_031427	DNAL1	....(((((((((.........&.))))))))).	4359	4373	1	-16.6	1	0.00559638	0.647	0.442145	0.720199	-11.3719	9	11	9	3UTR		1	1
hsa-miR-125b-5p	NM_032333	PRXL2A	.(((((...(((((((((.((.&.)).))))))))).))))).	4712	4751	1	-23.2	1	0.000515671	0.515	-0.093261	-0.11784	-8.70704	16	20	9	3UTR		1	1
hsa-miR-125b-5p	NM_032701	KMT5C	((((((((((((......((((&.))))..........)))))))))))).	2092	2137	1	-26.6	1	0.000570556	0.368	0.0510791	0.408424	-7.05204	16	28	12	3UTR		1	1
hsa-miR-125b-5p	NM_032892	FRMD5	(((((((((((((((.((((..&.))))))))))).)))))))).	3553	3595	1	-24.3	1	0.00127567	0.662	4.07765	2.63359	-4.17062	19	22	11	3UTR		1	1
hsa-miR-125b-5p	NM_033387	FAM78A	((((((((.((((((.......&.)))))).)))))))).	1511	1534	1	-23	1	0.00287245	0.485	-0.274165	-0.347087	-5.22701	14	17	8	3UTR		1	1
hsa-miR-125b-5p	NM_052851	STARD13	(((((((((((((.........&))).)))))))))).	5397	5412	1	-23.4	1	3.49e-05	0.485	5.0765	4.81959	-5.76291	13	15	10	3UTR	MIRT006849	1	1
hsa-miR-125b-5p	NM_133264	WIPF2	.(((((...(((((((..((((&)))).)))))))))))).	1904	1922	1	-22	1	3.44e-07	0.515	0.566537	0.880774	-8.70704	16	18	12	3UTR		1	1
hsa-miR-125b-5p	NM_133264	WIPF2	..((((((((((((.(((((..&))))).))))).))))))).	3000	3020	1	-21.9	1	3.23e-06	0.5	-0.00915392	0.0862733	-5.69245	17	20	7	3UTR		1	1
hsa-miR-125b-5p	NM_134262	RORA	((((((((((((((((((....&))))))))))....................)))))))).	5947	5986	1	-26.1	1	0.00196887	0.544	1.33904	0.693661	-3.93757	18	39	10	3UTR		1	1
hsa-miR-125b-5p	NM_138317	KCNK10	((((((((.((((..((((((.&)))))).....)).)))))))))).	4429	4454	1	-25.3	1	0.0322746	0.574	1.36008	2.0198	-6.58625	18	25	10	3UTR		1	1
hsa-miR-125b-5p	NM_138317	KCNK10	.((((((((((((((.......&))))).))))))))).	3133	3149	1	-21.1	1	0.000287237	0.544	0.107968	0.236709	-4.02637	14	16	9	3UTR		1	1
hsa-miR-125b-5p	NM_138317	KCNK10	.(((....((((((((((((..&))))))))))))......))).	5600	5622	1	-21.9	1	0.00166118	0.456	3.82345	2.74957	-13.6706	15	22	12	3UTR		1	1
hsa-miR-125b-5p	NM_138318	KCNK10	((((((((.((((..((((((.&)))))).....)).)))))))))).	4080	4105	1	-25.3	1	0.0322746	0.574	0.157921	-0.0795777	-6.58625	18	25	10	3UTR		1	1
hsa-miR-125b-5p	NM_138318	KCNK10	.((((((((((((((.......&))))).))))))))).	2784	2800	1	-21.1	1	0.000287237	0.544	0.0379055	0.725398	-4.02637	14	16	9	3UTR		1	1
hsa-miR-125b-5p	NM_138318	KCNK10	.(((....((((((((((((..&))))))))))))......))).	5251	5273	1	-21.9	1	0.00166118	0.456	1.41909	1.54031	-13.6706	15	22	12	3UTR		1	1
hsa-miR-125b-5p	NM_152283	ZFP62	(((((((((((...........&))))))))))).	3300	3312	1	-20	1	0.00192345	0.662	1.3917	1.0947	-10.3988	11	12	11	3UTR		1	1
hsa-miR-125b-5p	NM_152345	ANKRD13B	.(((((((((((..........&))))))))))).	2957	2969	1	-24.3	1	4.88e-06	0.324	0.978205	0.656714	-6.90779	11	12	11	3UTR		1	1
hsa-miR-125b-5p	NM_152588	TMTC2	(((((..(.(((((((((....&))))))))))..))))).	5414	5432	1	-21	1	0.0352818	0.456	-0.310157	2.69483	-8.43861	15	18	10	3UTR		1	1
hsa-miR-125b-5p	NM_173216	ST6GAL1	(((((((((((((..((((((.&)))))))))...........))))))).))).	2692	2724	1	-19.8	1	0.0193956	0.574	0.0837436	-0.219619	-5.52986	19	32	9	3UTR		1	1
hsa-miR-125b-5p	NM_173217	ST6GAL1	(((((((((((((..((((((.&)))))))))...........))))))).))).	2035	2067	1	-19.8	1	0.0193956	0.574	0.0837436	-0.219619	-5.52986	19	32	9	3UTR		1	1
hsa-miR-125b-5p	NM_173555	TYSND1	((((((((((((....(((((.&.)))))...)))))))))))).	2429	2473	1	-30.6	1	4.68e-06	0.441	3.40267	1.59647	-7.05204	17	22	12	3UTR		1	1
hsa-miR-125b-5p	NM_173642	RIMKLA	(((((((((((((...((((..&.))))...))))))))))))).	9259	9320	1	-28.4	1	0.0128539	0.544	0.689121	0.107019	-5.76291	17	22	13	3UTR		1	1
hsa-miR-125b-5p	NM_178006	STARD13	(((((((((((((.........&))).)))))))))).	5477	5492	1	-23.4	1	3.49e-05	0.485	5.95683	4.82528	-5.76291	13	15	10	3UTR	MIRT006849	1	1
hsa-miR-125b-5p	NM_178007	STARD13	(((((((((((((.........&))).)))))))))).	5405	5420	1	-23.4	1	3.49e-05	0.485	4.31391	4.78117	-5.76291	13	15	10	3UTR	MIRT006849	1	1
hsa-miR-125b-5p	NM_178441	ZFYVE1	.((((((((.(((((.......&))))).)))))))).	1229	1244	1	-20.7	1	0.00118713	0.471	0.920272	1.06554	-5.26888	13	15	8	3UTR	MIRT046077	1	1
hsa-miR-125b-5p	NM_178454	DRAM2	(((((((((.............&.))))))))).	962	979	1	-16.3	1	0.00648433	0.662	0.683022	1.05494	-14.4661	9	11	9	3UTR	MIRT735480	1	1
hsa-miR-125b-5p	NM_182487	OLFML2A	((((((.(((((.((((.....&.))))))))))))))).	3231	3260	1	-22.7	1	0.00632264	0.426	0.28587	-0.320641	-6.77039	15	17	15	3UTR		1	1
hsa-miR-125b-5p	NM_182551	LCLAT1	((((((((.((...........&)).)))))))).	2103	2115	1	-17.2	1	3.23e-05	0.529	1.72978	0.216047	-11.4552	10	12	8	3UTR		1	1
hsa-miR-125b-5p	NM_182757	RNF144B	((((((((((((..((((.(..&.).))))..))))))...)))))).	4233	4269	1	-23	1	0.00125048	0.588	-0.152175	0.103387	-6.08354	17	25	6	3UTR		1	1
hsa-miR-125b-5p	NM_198476	C19orf54	(((((((((((...........&))))))))))).	1825	1837	1	-21.5	1	2.52e-05	0.426	0.485758	0.974205	-10.3988	11	12	11	3UTR	MIRT046079	1	1
hsa-miR-125b-5p	NM_198527	HDDC3	((((((((.((((.........&)))).)))))))).	644	658	1	-20.1	1	0.00569169	0.412	3.4952	2.41746	-6.8193	12	14	8	3UTR		1	1
hsa-miR-125b-5p	NM_203344	SERTAD3	((((((((.(((((........&))))).)))))))).	1032	1047	1	-23.4	1	0.000224316	0.441	1.871	1.90105	-5.96246	13	15	8	3UTR		1	1
hsa-miR-125b-5p	NM_206926	SELENON	((((((((((............&)))))))))).	3621	3632	1	-19.3	1	0.000139861	0.515	0.969726	0.0471027	-13.2236	10	11	10	3UTR		1	1
hsa-miR-125b-5p	NM_213645	WARS1	(((((((((.......((((..&)))).......))))))))).	2364	2385	1	-17.7	1	0.00713105	0.485	1.51049	1.94131	-14.4661	13	21	9	3UTR		1	1
hsa-miR-125b-5p	NM_213646	WARS1	(((((((((.......((((..&)))).......))))))))).	2361	2382	1	-17.7	1	0.00713105	0.485	2.32265	1.96792	-14.4661	13	21	9	3UTR		1	1
hsa-miR-125b-5p	XM_005248175	PI4K2B	..((((.((((((((..(((((&.)))))..)))))))).)))).	2212	2251	1	-21.2	1	2.78e-05	0.676	0	0	-6.73374	17	22	8	3UTR		1	1
hsa-miR-125b-5p	XM_005254730	FRMD5	(((((((((((((((.((((..&.))))))))))).)))))))).	2585	2627	1	-24.3	1	0.00127567	0.662	0	0	-4.17062	19	22	11	3UTR		1	1
hsa-miR-125b-5p	XM_005257083	WIPF2	.(((((...(((((((..((((&)))).)))))))))))).	1888	1906	1	-22	1	3.44e-07	0.515	0	0	-8.70704	16	18	12	3UTR		1	1
hsa-miR-125b-5p	XM_005257083	WIPF2	..((((((((((((.(((((..&))))).))))).))))))).	2984	3004	1	-21.9	1	3.23e-06	0.5	0	0	-5.69245	17	20	7	3UTR		1	1
hsa-miR-125b-5p	XM_005257084	WIPF2	.(((((...(((((((..((((&)))).)))))))))))).	1846	1864	1	-22	1	3.44e-07	0.515	0	0	-8.70704	16	18	12	3UTR		1	1
hsa-miR-125b-5p	XM_005257084	WIPF2	..((((((((((((.(((((..&))))).))))).))))))).	2942	2962	1	-21.9	1	3.23e-06	0.5	0	0	-5.69245	17	20	7	3UTR		1	1
hsa-miR-125b-5p	XM_005259338	KMT5C	((((((((((((......((((&.))))..........)))))))))))).	1916	1961	1	-26.6	1	0.000570556	0.368	0	0	-7.05204	16	28	12	3UTR		1	1
hsa-miR-125b-5p	XM_005267683	MAP3K9	..(((((((((((((((.((..&.)).))))))).)))))))).	8767	8816	1	-27	1	0.00381912	0.529	0	0	-4.957	17	21	8	3UTR		1	1
hsa-miR-125b-5p	XM_005268244	AREL1	.((((((((((((((...((((&.))))......))))))))............)))))).	4325	4376	1	-21.4	1	7.07e-05	0.412	0	0	-4.02637	18	38	8	3UTR		1	1
hsa-miR-125b-5p	XM_005271945	JADE2	(((((((((((((.........&.))))).....)))))))).	4044	4084	1	-20.6	1	6.99e-05	0.559	0	0	-5.76291	13	20	8	3UTR		1	1
hsa-miR-125b-5p	XM_006721657	DDX42	.(((((((((((((........&.)))).))))))))).	3252	3303	1	-23	1	0.0101726	0.544	0	0	-4.76182	13	16	9	3UTR		1	1
hsa-miR-125b-5p	XM_006723179	SERTAD3	((((((((.(((((........&))))).)))))))).	1132	1147	1	-23.4	1	0.000224316	0.441	0	0	-5.96246	13	15	8	3UTR		1	1
hsa-miR-125b-5p	XM_006724836	TAZ	(((((.((.(((((.((((((.&)))).)).))))))).))))).	1269	1291	1	-24.7	1	4.03e-08	0.441	0	0	-7.63037	18	22	7	3UTR		1	1
hsa-miR-125b-5p	XM_006724837	TAZ	(((((.((.(((((.((((((.&)))).)).))))))).))))).	1254	1276	1	-24.7	1	4.03e-08	0.441	0	0	-7.63037	18	22	7	3UTR		1	1
hsa-miR-125b-5p	XM_006724841	TAZ	(((((.((.(((((.((((((.&)))).)).))))))).))))).	1193	1215	1	-24.7	1	4.03e-08	0.441	0	0	-7.63037	18	22	7	3UTR		1	1
hsa-miR-125b-5p	XM_011510976	GPC1	...(((((.((((.(((((((.&))))))).))))))))).	2713	2731	1	-24.9	1	3.28e-05	0.368	0	0	-8.42777	16	18	9	3UTR		1	1
hsa-miR-125b-5p	XM_011511163	PLEKHM3	((((((((((((((........&.)))))).)))))))).	3134	3166	1	-21.7	1	0.000138179	0.515	0	0	-4.90607	14	17	8	3UTR		1	1
hsa-miR-125b-5p	XM_011513670	TBC1D1	(((((((((..(..((((.(..&.).))))..)..))))))))).	2034	2078	1	-20.7	1	3.22e-05	0.471	0	0	-10.1508	15	22	9	3UTR	MIRT006523	1	1
hsa-miR-125b-5p	XM_011523831	KCNJ12	(((((((((((((.........&.)))))))..)))))).	3778	3817	1	-20.7	1	7.49e-08	0.324	0	0	-5.76291	13	17	7	3UTR		1	1
hsa-miR-125b-5p	XM_011531191	TAZ	(((((.((.(((((.((((((.&)))).)).))))))).))))).	1428	1450	1	-24.7	1	4.03e-08	0.441	0	0	-7.63037	18	22	7	3UTR		1	1
hsa-miR-125b-5p	XM_011531634	ZNF827	((((((((((((((((((....&.)))))))))))).................)))))).	6061	6113	1	-22.8	1	0.00204662	0.632	0	0	-3.93757	18	37	12	3UTR		1	1
hsa-miR-125b-5p	XM_011531634	ZNF827	...(((((((((((((.(((..&))))))))))).))))).	7254	7272	1	-22.3	1	0.00445103	0.691	0	0	-6.51454	16	18	11	3UTR		1	1
hsa-miR-125b-5p	XM_011533000	TTC7A	((((((((.((((.(((((((.&.)).)))))..)))).)))))))).	2082	2126	1	-28.3	1	9.52e-05	0.426	0	0	-5.8508	19	25	8	3UTR		1	1
hsa-miR-125b-5p	XM_011534101	BRPF1	(((((((((((((((.......&))))))....))))))))).	4271	4291	1	-21.9	1	0.000645668	0.368	0	0	-4.17062	15	20	9	3UTR		1	1
hsa-miR-125b-5p	XM_017000542	ELAVL4	..(((((((((((.........&)).))))))))).	609	622	1	-19.1	1	0.00777205	0.588	0	0	-6.78234	11	13	9	3UTR		1	1
hsa-miR-125b-5p	XM_017007303	BAP1	..((((..((((((((((....&))))))))))...)))).	2915	2933	1	-19.3	1	0.00045019	0.353	0	0	-8.81432	14	18	10	3UTR		1	1
hsa-miR-125b-5p	XM_017018142	TMEM135	(((......(((((((((((.(&.).)))))))))))......))).	1765	1799	1	-21.4	0	0.0166807	0.618	0	0	-17.9033	15	24	11	3UTR		1	1
hsa-miR-125b-5p	XM_017027156	ZSWIM4	.(((((.(((((((........&))))))).))))).	3679	3693	1	-22	1	4.5e-06	0.338	0	0	-6.30551	12	14	7	3UTR		1	1
hsa-miR-125b-5p	XM_017029762	TAZ	(((((.((.(((((.((((((.&)))).)).))))))).))))).	1179	1201	1	-24.7	1	4.03e-08	0.441	0	0	-7.63037	18	22	7	3UTR		1	1
hsa-miR-125b-5p	XM_024446869	TMEM168	(((((((((((((((((((...&.))))))))).....)))....))))))).	3962	4018	1	-20.6	1	0.0612679	0.647	0	0	-3.93757	19	30	9	3UTR		1	1
hsa-miR-125b-5p	XM_024448918	MSRB3	.(((((((((((((((.((.((&.)))).)))))))..................)))))))).	3323	3380	1	-23.4	1	0.000345644	0.426	0	0	-3.79332	19	40	8	3UTR		1	1
hsa-miR-125b-5p	XM_024448919	MSRB3	.(((((((((((((((.((.((&.)))).)))))))..................)))))))).	3436	3493	1	-23.4	1	0.000345644	0.426	0	0	-3.79332	19	40	8	3UTR		1	1
hsa-miR-125b-5p	XM_024448921	MSRB3	.(((((((((((((((.((.((&.)))).)))))))..................)))))))).	3552	3609	1	-23.4	1	0.000345644	0.426	0	0	-3.79332	19	40	8	3UTR		1	1
hsa-miR-125b-5p	XM_024450558	DDX42	.(((((((((((((........&.)))).))))))))).	2700	2751	1	-23	1	0.0101726	0.544	0	0	-4.76182	13	16	9	3UTR		1	1
hsa-miR-125b-5p	XM_024450656	ZNF652	((((((((.(((((.(((((((&)))))))...))))).))....)))))).	2655	2684	1	-21.4	1	0.000176188	0.574	0	0	-5.72941	20	29	7	3UTR		1	1
hsa-miR-125b-5p	XM_024453013	TTC7A	((((((((.((((.(((((((.&.)).)))))..)))).)))))))).	1685	1729	1	-28.3	1	9.52e-05	0.426	0	0	-5.8508	19	25	8	3UTR		1	1
hsa-miR-125b-5p	XM_024453717	FNDC3B	(((((((..((((((.......&.))))))..))))))).	6041	6071	1	-19.4	1	2.62e-05	0.515	0	0	-7.54065	13	17	7	3UTR		1	1
hsa-miR-125b-5p	XM_024453717	FNDC3B	((((((((((.(.((((((((.&))))).))).).))..)))))))).	5204	5229	1	-18.9	1	7.31e-05	0.647	0	0	-8.05148	19	25	8	3UTR		1	1
hsa-miR-125b-5p	NM_014761	IST1	(((((((((..(((........&)))..))))))))).	1815	1830	1	-18.1	1	0.000223219	0.456	3.79713	1.11272	-8.97335	12	15	9	3UTR		1	1
hsa-miR-125b-5p	NM_014992	DAAM1	(((((((((.............&.))))))))).	4427	4444	1	-16.5	1	0.00848407	0.721	2.62677	2.61919	-14.4661	9	11	9	3UTR		1	1
hsa-miR-125b-5p	NM_015173	TBC1D1	(((((((((..(..((((.(..&.).))))..)..))))))))).	3944	3976	1	-20.7	1	3.22e-05	0.471	0.311204	0.777581	-10.1508	15	22	9	3UTR	MIRT006523	1	1
hsa-miR-125b-5p	NM_015177	DTX4	((((((.((((((..(((((..&)))))...)))))))).)))).	4543	4565	1	-20.9	1	0.000319944	0.456	-0.349494	-0.046837	-7.07355	17	22	8	3UTR		1	1
hsa-miR-125b-5p	NM_015177	DTX4	((((((.(.((((((.((((..&)))).)))))).))))))).	3773	3793	1	-22.2	1	0.00638336	0.426	0.277146	0.400656	-6.7707	17	20	7	3UTR		1	1
hsa-miR-125b-5p	NM_015288	JADE2	(((((((((((((.........&.))))).....)))))))).	3739	3779	1	-20.6	1	6.99e-05	0.559	2.74531	1.85352	-5.76291	13	20	8	3UTR		1	1
hsa-miR-125b-5p	NM_015492	C15orf39	((((((((.(((....((((..&)))).....))).)))))))).	4170	4192	1	-21.7	1	6.06e-05	0.441	1.39345	0.208444	-8.10843	15	22	8	3UTR	MIRT046063	1	1
hsa-miR-125b-5p	NM_016032	ZDHHC9	..(((((((((((((.......&))))))))).)))).	1938	1953	1	-20.8	1	1.53e-06	0.412	0.581039	1.4741	-5.19005	13	15	9	3UTR		1	1
hsa-miR-125b-5p	NM_017456	CYTH1	.((((((((((((.........&.))))..)))))))).	2506	2546	1	-19.8	1	0.000156745	0.368	5.40452	5.29675	-5.61866	12	16	8	3UTR		1	1
hsa-miR-125b-5p	NM_017590	ZC3H7B	(((((((((((((..((((...&))))))))))))))))).	5169	5187	1	-23.9	1	1.32e-05	0.471	-0.366827	1.04477	-5.52986	17	18	17	3UTR		1	1
hsa-miR-125b-5p	NM_017590	ZC3H7B	(((((((((((((((((((((.&)).)))))..........)))).)).)))))))).	5304	5339	1	-23.3	1	0.000193276	0.441	0.15979	-0.192061	-3.93757	21	35	8	3UTR		1	1
hsa-miR-125b-5p	NM_017628	TET2	...(((((((((((((((((((&)))))))))))))...................)))))).	4291	4330	1	-21	1	0.00605645	0.618	0.23517	0.0974823	-6.51454	19	39	13	3UTR	MIRT438630	1	1
hsa-miR-125b-5p	NM_017759	INO80D	((((((((((....((((....&))))..)))))))))).	8969	8986	1	-20.2	1	0.000445556	0.647	0	0	-12.2551	14	17	10	3UTR		1	1
hsa-miR-125b-5p	NM_017811	UBE2R2	(((((((((.(((..(((((..&)))))..))).))))))))).	3099	3120	1	-23	1	0.000531012	0.515	-0.00222873	0.303839	-6.77237	17	21	9	3UTR		1	1
hsa-miR-125b-5p	NM_017811	UBE2R2	..(((((((((((.((((.(..&.).)))))).))))))))).	3817	3839	1	-21.9	1	0.000238794	0.544	0.711153	0.397068	-5.81384	16	20	9	3UTR		1	1
hsa-miR-125b-5p	NM_017913	CDC37L1	((((((((((((..((((((..&.))).)))..)))...))))))))).	1949	1993	1	-24.8	1	0.000364749	0.632	0.645071	0.298271	-6.08354	18	26	9	3UTR		1	1
hsa-miR-125b-5p	NM_018320	RNF121	((((((((((((..........&))))))).))))).	2166	2180	1	-19.9	1	0.0407828	0.456	0.591954	0.265013	-7.05204	12	14	7	3UTR		1	1
hsa-miR-125b-5p	NM_018323	PI4K2B	..((((.((((((((..(((((&)))))..)))))))).)))).	2450	2471	1	-20.9	1	2.78e-05	0.676	0.402992	0.187706	-6.73374	17	21	8	3UTR		1	1
hsa-miR-125b-5p	NM_018330	SHTN1	..((((((((((((........&.))))))).))))).	5992	6011	1	-18	1	0.0243661	0.588	3.05079	2.61671	-5.9255	12	15	7	3UTR		1	1
hsa-miR-125b-5p	NM_019020	TBC1D16	(((((((..((((((((((((.&)))..)))))))))..))))).)).	5535	5560	1	-24.7	1	0.000155348	0.324	-0.477158	-0.259127	-7.3076	19	25	9	3UTR		1	1
hsa-miR-125b-5p	NM_019096	GTPBP2	((((((((((((..........&.)))).........)))))))).	2902	2932	1	-18.4	1	6.32e-06	0.529	2.61039	1.43951	-7.05204	12	23	8	3UTR		1	1
hsa-miR-125b-5p	NM_020225	STOX2	((((((((.((((((.......&)))))))))))))).	8991	9006	1	-20	1	4.34e-05	0.559	0.723146	0.071184	-5.22701	14	15	14	3UTR	MIRT546392	1	1
hsa-miR-125b-5p	NM_020239	CDC42SE1	((((((((...((((..((((.&))))..)))).)))))))).	2225	2245	1	-21.1	1	0.000157075	0.471	-0.085901	1.19937	-9.29429	16	20	8	3UTR		1	1
hsa-miR-125b-5p	NM_020451	SELENON	((((((((((............&)))))))))).	3723	3734	1	-19.3	1	0.000139861	0.515	0.969726	0.0471027	-13.2236	10	11	10	3UTR		1	1
hsa-miR-125b-5p	NM_020749	MTUS1	.(((((((((((((........&)))))........)))))))).	1911	1933	1	-19.2	1	0.00114213	0.618	0.573804	1.31398	-4.76182	13	22	8	3UTR		1	1
hsa-miR-125b-5p	NM_020778	ALPK3	.(((((((.(((((.((.....&)).)))))))))))).	5781	5797	1	-21.5	1	1.18e-08	0.426	0.241518	0.278244	-5.58516	14	16	12	3UTR		1	1
hsa-miR-125b-5p	NM_021012	KCNJ12	(((((((((((((.........&.)))))))..)))))).	4035	4074	1	-20.7	1	7.49e-08	0.324	-0.3579	-0.311559	-5.76291	13	17	7	3UTR		1	1
hsa-miR-125b-5p	NM_021161	KCNK10	((((((((.((((..((((((.&)))))).....)).)))))))))).	4400	4425	1	-25.3	1	0.0322746	0.574	2.22993	1.37962	-6.58625	18	25	10	3UTR		1	1
hsa-miR-125b-5p	NM_021161	KCNK10	.(((....((((((((((((..&))))))))))))......))).	5571	5593	1	-21.9	1	0.00166118	0.456	1.77267	2.95414	-13.6706	15	22	12	3UTR		1	1
hsa-miR-125b-5p	NM_021184	C6orf47	((((((((.(((((........&)))))..)))))))).	1793	1809	1	-21.7	1	0.0149714	0.456	-0.252315	0.252805	-5.96246	13	16	8	3UTR		1	1
hsa-miR-125b-5p	NM_022153	VSIR	((((((((((((((........&)))))...............))))))))).	4179	4209	1	-20.4	1	0.00222105	0.471	2.44129	1.69946	-4.90607	14	30	9	3UTR		1	1
hsa-miR-125b-5p	NM_022778	CEP85	(((((((((((((.........&)).)))))))).))).	2517	2533	1	-18.9	1	5.55e-05	0.412	0.212111	0.392895	-5.76291	13	16	8	3UTR		1	1
hsa-miR-125b-5p	NM_024674	LIN28A	.((((.(((((((.((((((..&.)))))).))))).)).)))).	883	926	1	-25.6	1	0.000289158	0.426	0.0963346	0.670781	-6.55112	17	22	6	3UTR	MIRT003845	1	1
hsa-miR-125b-5p	NM_024923	NUP210	((((((((((((((........&))).))))))))))).	6151	6167	1	-25	1	0.000570659	0.544	4.04763	3.67834	-4.90607	14	16	11	3UTR		1	1
hsa-miR-125b-5p	NM_002304	LFNG	(((((((((((((.........&))))......))))))))).	1977	1997	1	-20.3	1	0.002299	0.559	1.85525	1.42321	-5.76291	13	20	9	3UTR		1	1
hsa-miR-125b-5p	NM_002442	MSI1	(((((((((((((.........&))).)))))))))).	2245	2260	1	-23.6	1	0.00114927	0.412	6.06543	4.73227	-5.76291	13	15	10	3UTR		1	1
hsa-miR-125b-5p	NM_002446	MAP3K10	((((((((.((((..((.....&))..))))...)))))))).	3676	3696	1	-21.6	1	0.0131488	0.397	2.80066	1.08413	-6.58625	14	20	8	3UTR		1	1
hsa-miR-125b-5p	NM_002943	RORA	((((((((((((((((((....&))))))))))....................)))))))).	6234	6273	1	-26.1	1	0.00196887	0.544	0.703653	0.314747	-3.93757	18	39	10	3UTR		1	1
hsa-miR-125b-5p	NM_003032	ST6GAL1	(((((((((((((..((((((.&)))))))))...........))))))).))).	2391	2423	1	-19.8	1	0.0193956	0.574	0.0837436	-0.219619	-5.52986	19	32	9	3UTR		1	1
hsa-miR-125b-5p	NM_003045	SLC7A1	((((((((((((..((((....&.))))))))))).))))).	5104	5131	1	-23.9	1	0.000804553	0.353	0.573884	2.60634	-6.08354	16	19	11	3UTR	MIRT005000	1	1
hsa-miR-125b-5p	NM_003150	STAT3	.((((((.(((((..((((...&))))...))))))))))).	4495	4514	1	-19.8	1	0.000361684	0.515	3.98261	4.9597	-7.69925	15	19	11	3UTR	MIRT005006	1	1
hsa-miR-125b-5p	NM_003173	SUV39H1	((((((((((.....(.((((.&.)))).)....)))))))))).	2196	2242	1	-22.6	1	0.00485556	0.426	1.44305	1.4324	-12.9906	15	22	10	3UTR	MIRT735058	1	1
hsa-miR-125b-5p	NM_003326	TNFSF4	.((((((((.((...(((((..&))))).....))...)))))))).	1514	1538	1	-20.2	1	0.000309964	0.559	0.601959	0.186911	-7.91725	15	24	8	3UTR		1	1
hsa-miR-125b-5p	NM_004205	USP2	((((((((((...(((((((..&)))))))...)))))))))).	2820	2841	1	-19.8	1	0.00800795	0.691	1.83147	1.53358	-11.3983	17	21	10	3UTR		1	1
hsa-miR-125b-5p	NM_004285	H6PD	.(((((((.(((((........&))))).))))))).	8548	8562	1	-21.4	1	2.27e-05	0.382	-0.228222	-0.487897	-5.81821	12	14	7	3UTR		1	1
hsa-miR-125b-5p	NM_004423	DVL3	..((((((((((..........&)))))))))).	3724	3735	1	-21	1	6.36e-05	0.456	0.296011	0.261305	-8.07147	10	11	10	3UTR		1	1
hsa-miR-125b-5p	NM_004514	FOXK2	..((((((((((((..((((((&)))))).....)))))))))))).	2578	2602	1	-21.1	1	0.00642312	0.588	2.91594	2.06077	-5.9255	18	24	12	3UTR		1	1
hsa-miR-125b-5p	NM_004535	MYT1	(((((((((.(((.........&))).))))))))).	4054	4068	1	-20.7	1	0.00116926	0.529	4.93065	2.28457	-7.00542	12	14	9	3UTR		1	1
hsa-miR-125b-5p	NM_004634	BRPF1	(((((((((((((((.......&))))))....))))))))).	4163	4183	1	-21.9	1	0.000645668	0.368	1.97149	2.0617	-4.17062	15	20	9	3UTR		1	1
hsa-miR-125b-5p	NM_004716	PCSK7	(((((((((((((....((((.&))))...))))))..)))).))).	3612	3636	1	-21.7	1	8.59e-06	0.441	4.80577	2.83095	-5.76291	17	24	6	3UTR		1	1
hsa-miR-125b-5p	NM_004756	NUMBL	..((((.((((((..((((((.&))).)))..)))))))))).	2640	2660	1	-22.4	1	0.00016508	0.324	1.59266	2.38448	-8.09298	16	20	10	3UTR		1	1
hsa-miR-125b-5p	NM_004762	CYTH1	.((((((((((((.........&.))))..)))))))).	2578	2618	1	-19.8	1	0.000156745	0.368	5.32241	5.03451	-5.61866	12	16	8	3UTR		1	1
hsa-miR-125b-5p	NM_004947	DOCK3	(((((((..(((((((((....&))))))))).))))))).	8308	8326	1	-22.4	1	0.0387743	0.529	-0.386055	0.224775	-7.3076	16	18	9	3UTR		1	1
hsa-miR-125b-5p	NM_004975	KCNB1	((((((((.((((...((((..&)))))))).)))))))).	4959	4977	1	-19.9	1	0.00412396	0.412	-0.337829	0.293138	-6.8193	16	18	8	3UTR		1	1
hsa-miR-125b-5p	NM_005158	ABL2	.((.((((.(((((((((.(((&))).))))).)))))))).)).	6209	6231	1	-21.5	1	2.78e-05	0.544	0.376415	-0.105001	-7.88174	18	22	8	3UTR		1	1
hsa-miR-125b-5p	NM_005439	MLF2	(((((((((((((.........&.))))))))))))).	936	958	1	-27.8	1	9.88e-10	0.353	4.54261	4.28408	-5.76291	13	15	13	3UTR		1	1
hsa-miR-125b-5p	NM_005440	RND2	(((((((..(((..((((((..&)))))))))..))))))).	1047	1066	1	-22.5	1	0.00218936	0.412	-0.13176	0.148788	-9.45357	16	19	9	3UTR		1	1
hsa-miR-125b-5p	NM_005819	STX6	((((...(((((((((((.(..&).))))))))))))))).	1911	1929	1	-21.3	1	0.011246	0.574	0.0873466	0.000466819	-11.5013	16	18	15	3UTR		1	1
hsa-miR-125b-5p	NM_006288	THY1	((((...(((((((.((((((.&.)))))).......)))))))...)))).	4248	4298	1	-22.5	1	6.72e-05	0.456	3.56828	1.57605	-12.2367	17	29	7	3UTR		1	1
hsa-miR-125b-5p	NM_006912	RIT1	((((((((((((((((((....&))))))))......)))).)))))).	1352	1378	1	-20.1	1	0.000896559	0.603	0.0388021	0.172693	-3.93757	18	26	8	3UTR		1	1
hsa-miR-125b-5p	NM_007314	ABL2	.((.((((.(((((((((.(((&))).))))).)))))))).)).	6502	6524	1	-21.5	1	2.78e-05	0.544	0.42509	0.454751	-7.88174	18	22	8	3UTR		1	1
hsa-miR-125b-5p	NM_012154	AGO2	((((((((((((((((..((((&.))))))))))).......)))).))))).	10153	10188	1	-21.9	1	0.00128878	0.456	-0.464604	-0.00655313	-3.93757	20	30	11	3UTR		1	1
hsa-miR-125b-5p	NM_012214	MGAT4A	.(((((((((((..(((.....&.))))))).))))))).	4767	4810	1	-20.1	1	4.75e-06	0.471	-0.0706696	-0.19336	-5.9393	14	17	7	3UTR		1	1
hsa-miR-125b-5p	NM_012214	MGAT4A	..((((((.(((..((((((..&))))))))))))))).	4055	4071	1	-19.8	1	2.97e-06	0.5	-0.387102	-0.294807	-8.15936	15	16	15	3UTR		1	1
hsa-miR-125b-5p	NM_014351	SULT4A1	(((((.((((((.(((((((..&.)))))))))))))...))))).	1495	1524	1	-22.6	1	0.00691573	0.5	2.68547	3.14416	-7.12766	18	23	13	3UTR		1	1
hsa-miR-125b-5p	NM_001319049	BRPF1	(((((((((((((((.......&))))))....))))))))).	3878	3898	1	-21.9	1	0.000645668	0.368	2.66433	1.37439	-4.17062	15	20	9	3UTR		1	1
hsa-miR-125b-5p	NM_001319050	BRPF1	(((((((((((((((.......&))))))....))))))))).	4160	4180	1	-21.9	1	0.000645668	0.368	2.66433	1.37439	-4.17062	15	20	9	3UTR		1	1
hsa-miR-125b-5p	NM_001319944	CEP85	(((((((((((((.........&)).)))))))).))).	2514	2530	1	-18.9	1	5.55e-05	0.412	0.212111	0.392895	-5.76291	13	16	8	3UTR		1	1
hsa-miR-125b-5p	NM_001320156	NRXN1	..((((((((..((((((((((&))))))))))..)))))))).	2486	2507	1	-21.2	1	0.00693977	0.706	2.57219	2.29054	-11.1286	18	21	10	3UTR		1	1
hsa-miR-125b-5p	NM_001320157	NRXN1	..((((((((..((((((((((&))))))))))..)))))))).	2477	2498	1	-21.2	1	0.00693977	0.706	2.59096	2.2659	-11.1286	18	21	10	3UTR		1	1
hsa-miR-125b-5p	NM_001320675	BNIP2	.((((((((((((.(((((.((&.))))))))))))))..))).)).	3766	3816	1	-19.6	1	0.00194105	0.647	0.0263317	0.454195	-4.65016	19	24	14	3UTR		1	1
hsa-miR-125b-5p	NM_001322950	FRMD5	(((((((((((((((.((((..&.))))))))))).)))))))).	3374	3416	1	-24.3	1	0.00127567	0.662	4.07765	2.63359	-4.17062	19	22	11	3UTR		1	1
hsa-miR-125b-5p	NM_001324216	ELAVL4	..(((((((((((.........&)).))))))))).	760	773	1	-19.1	1	0.00777205	0.588	0.440398	0.382685	-6.78234	11	13	9	3UTR		1	1
hsa-miR-125b-5p	NM_001330432	KIAA1841	((((((((((.((...((((..&))))..)).)).)))))))).	3335	3356	1	-17.9	1	0.000390778	0.676	2.79911	1.61815	-8.58769	16	21	8	3UTR		1	1
hsa-miR-125b-5p	NM_001330458	ATL2	(((((((((.(((.........&)))...))))))))).	1819	1835	1	-16.3	1	0.000614267	0.735	1.5802	1.68963	-7.00542	12	16	9	3UTR		1	1
hsa-miR-125b-5p	NM_001330461	ATL2	(((((((((.(((.........&)))...))))))))).	2311	2327	1	-16.3	1	0.000614267	0.735	2.5105	1.74802	-7.00542	12	16	9	3UTR		1	1
hsa-miR-125b-5p	NM_001330470	MTUS1	.(((((((((((((........&)))))........)))))))).	1499	1521	1	-19.2	1	0.00114213	0.618	0.00781508	0.248552	-4.76182	13	22	8	3UTR		1	1
hsa-miR-125b-5p	NM_001349881	DRAM2	(((((((((.............&.))))))))).	1173	1190	1	-16.3	1	0.00648433	0.662	2.62283	3.33589	-14.4661	9	11	9	3UTR	MIRT735480	1	1
hsa-miR-125b-5p	NM_001350973	PLEKHA8	((((((((((((((........&.)))))))).)))))).	2191	2243	1	-21.2	1	0.00156304	0.632	-0.350003	0.071252	-4.90607	14	17	8	3UTR	MIRT004995	1	1
hsa-miR-125b-5p	NM_001350974	PLEKHA8	((((((((((((((........&.)))))))).)))))).	2129	2181	1	-21.2	1	0.00156304	0.632	-0.350003	0.071252	-4.90607	14	17	8	3UTR	MIRT004995	1	1
hsa-miR-125b-5p	NM_001357857	ATXN1	(((((.(..(((((((((.(..&.).))))))))).).))))).	4190	4223	1	-22.5	1	0.00458675	0.338	0.069933	0.354411	-9.20856	16	21	9	3UTR	MIRT005007	1	1
hsa-miR-125b-5p	NM_001363062	MTUS1	.(((((((((((((........&)))))........)))))))).	4146	4168	1	-19.2	1	0.00114213	0.618	0.825317	0.497546	-4.76182	13	22	8	3UTR		1	1
hsa-miR-125b-5p	NM_001363695	PPT1	((((((((.(.(((..((((((&))))))))).))))))))).	875	895	1	-22	1	4.39e-05	0.515	0.178159	0.677266	-8.78724	18	20	9	3UTR		1	1
hsa-miR-125b-5p	NM_001367982	SCARB1	(((((..(.(((((((......&.))))))).)..))))).	1994	2044	1	-21.1	1	0.00343961	0.382	-0.250393	-0.274313	-8.43861	13	18	7	3UTR		1	1
hsa-miR-125b-5p	NM_001368095	TGOLN2	..((((((((((((((.((((.&)))).)))))))))).................)))).	4459	4496	1	-20.6	1	0.0106117	0.559	1.9569	0.498153	-4.957	18	37	10	3UTR		1	1
hsa-miR-125b-5p	NM_001369512	STAT3	.((((((.(((((..((((...&))))...))))))))))).	4498	4517	1	-19.8	1	0.000361684	0.515	3.98261	4.9597	-7.69925	15	19	11	3UTR	MIRT005006	1	1
hsa-miR-125b-5p	NM_001369518	STAT3	.((((((.(((((..((((...&))))...))))))))))).	4451	4470	1	-19.8	1	0.000361684	0.515	4.37417	4.95032	-7.69925	15	19	11	3UTR	MIRT005006	1	1
hsa-miR-125b-5p	NM_001382225	MLF2	(((((((((((((.........&.))))))))))))).	1326	1348	1	-27.8	1	9.88e-10	0.353	5.11141	4.53731	-5.76291	13	15	13	3UTR		1	1
hsa-miR-125b-5p	NM_001382226	MLF2	(((((((((((((.........&.))))))))))))).	1104	1126	1	-27.8	1	9.88e-10	0.353	5.11141	4.53731	-5.76291	13	15	13	3UTR		1	1
hsa-miR-125b-5p	NM_001384	DPH2	((((((((.((((.........&.)))))))))))).	1834	1872	1	-20.2	1	0.0154698	0.471	0.181418	0.0559826	-6.8193	12	14	12	3UTR		1	1
hsa-miR-125b-5p	NM_001795	CDH5	(((((((((........(((((&)))))))))))))).	3515	3530	1	-18.9	1	0.00320596	0.471	2.1568	0.170523	-14.4661	14	15	14	3UTR	MIRT052977	1	1
hsa-miR-125b-5p	NM_000310	PPT1	((((((((.(.(((..((((((&))))))))).))))))))).	947	967	1	-22	1	4.39e-05	0.515	-0.0865425	-0.0988405	-8.78724	18	20	9	3UTR		1	1
hsa-miR-125b-5p	NM_000370	TTPA	(((((((((......(((((..&)))))........))))))))).	1377	1400	1	-19.3	1	0.0421421	0.676	0.489617	0.271707	-14.2331	14	23	9	3UTR		1	1
hsa-miR-125b-5p	NM_000430	PAFAH1B1	(((...((((((((((((((((&))))))))).............)))))))...))).	2795	2831	1	-18.8	1	0.0102119	0.676	1.21929	1.00203	-12.9896	19	36	9	3UTR		1	1
hsa-miR-125b-5p	NM_000633	BCL2	((((((((.(((..........&))).)))))))).	4016	4029	1	-21.2	1	0.000320089	0.471	0.298056	-0.0336991	-8.10843	11	13	8	3UTR	MIRT006253	1	1
hsa-miR-125b-5p	NM_000725	CACNB3	((((((.((((((((((((...&.))))))))))))...)))))).	2763	2802	1	-23.7	1	5.9e-05	0.426	0.906858	0.467422	-5.48126	18	23	12	3UTR		1	1
hsa-miR-125b-5p	NM_001001931	MTUS1	.(((((((((((((........&)))))........)))))))).	1949	1971	1	-19.2	1	0.00114213	0.618	0.517714	0.273983	-4.76182	13	22	8	3UTR		1	1
hsa-miR-125b-5p	NM_001002257	LCLAT1	((((((((.((...........&.)).)))))))).	1902	1923	1	-17.2	1	3.23e-05	0.529	0.357328	0.209992	-11.4552	10	13	8	3UTR		1	1
hsa-miR-125b-5p	NM_001003694	BRPF1	(((((((((((((((.......&))))))....))))))))).	4181	4201	1	-21.9	1	0.000645668	0.368	2.76559	1.50983	-4.17062	15	20	9	3UTR		1	1
hsa-miR-125b-5p	NM_001003698	RREB1	...((((((((..(((((((((&))))))))).)))))))).	8328	8347	1	-19.6	1	0.00224283	0.647	3.1281	3.83128	-11.1505	17	19	9	3UTR		1	1
hsa-miR-125b-5p	NM_001003699	RREB1	...((((((((..(((((((((&))))))))).)))))))).	8493	8512	1	-19.6	1	0.00224283	0.647	3.1281	3.83128	-11.1505	17	19	9	3UTR		1	1
hsa-miR-125b-5p	NM_001003700	RREB1	...((((((((..(((((((((&))))))))).)))))))).	7695	7714	1	-19.6	1	0.00224283	0.647	3.1281	3.83128	-11.1505	17	19	9	3UTR		1	1
hsa-miR-125b-5p	NM_001008222	ZDHHC9	..(((((((((((((.......&.))))))))).)))).	2014	2035	1	-21	1	1.53e-06	0.412	1.81515	1.04466	-5.19005	13	16	9	3UTR		1	1
hsa-miR-125b-5p	NM_001010888	ZC3H12B	((((((((...((..(((((((&)))))))..))...)))))))).	5440	5463	1	-24.6	1	0.00931242	0.515	0	0	-10.6535	17	23	8	3UTR		1	1
hsa-miR-125b-5p	NM_001010898	SLC6A17	.(((((((.((((.((((((..&)))))).....))))))))))).	3194	3217	1	-23.9	1	3.04e-05	0.324	0.320336	-0.15439	-5.70655	17	23	11	3UTR		1	1
hsa-miR-125b-5p	NM_001029859	KCTD21	.(((((((((((..........&.)))))))...)))).	2380	2405	1	-18.5	1	6.22e-06	0.368	0.586638	0.926585	-6.90779	11	16	7	3UTR		1	1
hsa-miR-125b-5p	NM_001038707	CDC42SE1	((((((((...((((..((((.&))))..)))).)))))))).	2361	2381	1	-21.1	1	0.000157075	0.471	3.66741	1.9835	-9.29429	16	20	8	3UTR		1	1
hsa-miR-125b-5p	NM_001039479	AREL1	..(((((..((...((((((((&))))))))....))..))))).	3987	4009	1	-20.3	1	5.72e-07	0.515	3.85802	3.48913	-13.8198	15	22	8	3UTR		1	1
hsa-miR-125b-5p	NM_001039589	DPH2	((((((((.((((.........&.)))))))))))).	1150	1188	1	-20.2	1	0.0154698	0.471	0.181418	0.0559826	-6.8193	12	14	12	3UTR		1	1
hsa-miR-125b-5p	NM_001039960	SLC4A8	((((((.((((((..(((((..&.)))))..)))).)))))))).	4156	4185	1	-22.1	1	0.0306826	0.559	0.11167	0.249887	-7.07355	17	22	8	3UTR		1	1
hsa-miR-125b-5p	NM_001040167	LFNG	(((((((((((((.........&))))......))))))))).	2364	2384	1	-20.3	1	0.002299	0.559	1.85525	1.42321	-5.76291	13	20	9	3UTR		1	1
hsa-miR-125b-5p	NM_001040273	TYSND1	((((((((((((....(((((.&.)))))...)))))))))))).	2112	2156	1	-30.6	1	4.68e-06	0.441	1.76659	3.449	-7.05204	17	22	12	3UTR		1	1
hsa-miR-125b-5p	NM_001079559	HNRNPUL2	(((((..(.((((.((((.((.&)).)))))))).)..))))).	3013	3034	1	-21.5	1	0.0794804	0.456	3.62865	2.8916	-9.29545	16	21	8	3UTR		1	1
hsa-miR-125b-5p	NM_001099270	ZBTB34	(((((.((.((((...(((((.&)))))....)))))).))))).	5439	5461	1	-21.5	1	0.0638422	0.588	2.02981	1.41867	-8.72026	16	22	6	3UTR		1	1
hsa-miR-125b-5p	NM_001099270	ZBTB34	..((((((((((((........&.)))))))))))).	3841	3862	1	-21.1	1	0.000904771	0.662	2.53009	1.79995	-5.9255	12	14	12	3UTR		1	1
hsa-miR-125b-5p	NM_001099287	NIPAL4	((((((((((............&)))))))))).	1929	1940	1	-19.3	1	0.000469819	0.529	2.03956	0.506362	-13.2236	10	11	10	3UTR		1	1
hsa-miR-125b-5p	NM_001099294	SHISAL1	(((.(((((((((((((((((.&)))))).)))).))))))).))).	2587	2611	1	-24.7	1	0.00012053	0.456	0.555229	0.335588	-6.9696	20	24	7	3UTR		1	1
hsa-miR-125b-5p	NM_001102575	SNX18	((..(((((((((...(((((.&))))))))))))))..)).	2395	2414	1	-18.1	1	0.00187351	0.515	3.69921	3.20103	-10.3525	16	19	14	3UTR		1	1
hsa-miR-125b-5p	NM_001114600	SZRD1	.((((((((((((..(((((..&))).))..)))))))))).)).	999	1021	1	-20.5	1	0.0269284	0.662	2.32188	2.27403	-5.38561	17	22	10	3UTR		1	1
hsa-miR-125b-5p	NM_001127208	TET2	(((((((..((((((.(((((.&.))))).))))))..))))))).	9052	9088	1	-21.6	1	0.0629489	0.574	0.427045	1.08453	-7.54065	18	23	7	3UTR	MIRT438630	1	1
hsa-miR-125b-5p	NM_001127211	SHTN1	..((((((((((((........&.))))))).))))).	6306	6325	1	-18	1	0.0243661	0.588	3.05079	2.61671	-5.9255	12	15	7	3UTR		1	1
hsa-miR-125b-5p	NM_001127671	LIFR	((((((((((....(((((((.&)))).)))...)))))))))).	8182	8204	1	-19.2	1	0.011073	0.647	2.43869	1.94615	-12.2551	17	22	10	3UTR	MIRT732494	1	1
hsa-miR-125b-5p	NM_001130967	ZNF385A	(((((((((((((..(((.(((&.))).)))..))))...........))))))))).	1370	1420	1	-27	1	0.000122728	0.338	2.80617	2.86498	-5.52986	19	35	9	3UTR	MIRT500382	1	1
hsa-miR-125b-5p	NM_001130968	ZNF385A	(((((((((((((..(((.(((&.))).)))..))))...........))))))))).	1127	1177	1	-27	1	0.000122728	0.338	2.83691	2.0635	-5.52986	19	35	9	3UTR	MIRT500382	1	1
hsa-miR-125b-5p	NM_001135095	FNDC3B	(((((((..((((((.......&.))))))..))))))).	6009	6039	1	-19.4	1	2.62e-05	0.515	0	0	-7.54065	13	17	7	3UTR		1	1
hsa-miR-125b-5p	NM_001135095	FNDC3B	((((((((((.(.((((((((.&))))).))).).))..)))))))).	5172	5197	1	-18.9	1	7.31e-05	0.647	0	0	-8.05148	19	25	8	3UTR		1	1
hsa-miR-125b-5p	NM_001142386	PDK3	((((((((((.((.(((((...&.))))).)).)))))))))).	3019	3054	1	-22.4	1	3.52e-05	0.515	-0.236957	-0.041288	-7.61919	17	21	10	3UTR		1	1
hsa-miR-125b-5p	NM_001143826	MAPRE2	.((((((((.((((.(((.(((&.)))))).)))).)))))))).	1547	1595	1	-20.1	1	0.00377357	0.559	3.64663	2.0316	-5.77128	18	22	8	3UTR		1	1
hsa-miR-125b-5p	NM_001145077	LRRC10B	.((((((((((((.........&))))))))..)))).	1423	1438	1	-19.8	1	4.24e-06	0.412	-0.0648333	-0.148289	-5.61866	12	15	8	3UTR		1	1
hsa-miR-125b-5p	NM_001145427	SNX18	((..(((((((((...(((((.&))))))))))))))..)).	2548	2567	1	-18.1	1	0.00187351	0.515	3.69921	3.20103	-10.3525	16	19	14	3UTR		1	1
hsa-miR-125b-5p	NM_001162422	ETS1	.((((((((..((.(((((.((&)).))))).))..)))))))).	2837	2859	1	-19.7	1	0.000429533	0.588	1.14948	1.73289	-8.71745	17	22	8	3UTR	MIRT006387	1	1
hsa-miR-125b-5p	NM_001164440	ANKRD33B	..((((((.(((((.((((((.&))))))..))))))))))).	6085	6105	1	-26.3	1	5.55e-12	0.368	-0.435076	-0.259402	-6.74884	17	20	11	3UTR	MIRT256243	1	1
hsa-miR-125b-5p	NM_001164440	ANKRD33B	..(((((((((....((((((.&))))))......))))))))).	5435	5457	1	-23.8	1	8.07e-05	0.353	-0.361235	-0.177791	-11.1852	15	22	9	3UTR	MIRT256243	1	1
hsa-miR-125b-5p	NM_001166355	LFNG	(((((((((((((.........&))))......))))))))).	2189	2209	1	-20.3	1	0.002299	0.559	1.85525	1.42321	-5.76291	13	20	9	3UTR		1	1
hsa-miR-125b-5p	NM_001166393	MTUS1	.(((((((((((((........&)))))........)))))))).	1826	1848	1	-19.2	1	0.00114213	0.618	3.17939	2.68861	-4.76182	13	22	8	3UTR		1	1
hsa-miR-125b-5p	NM_001168236	ABL2	.((.((((.(((((((((.(((&))).))))).)))))))).)).	6439	6461	1	-21.5	1	2.78e-05	0.544	-0.0494819	0.52472	-7.88174	18	22	8	3UTR		1	1
hsa-miR-125b-5p	NM_001168237	ABL2	.((.((((.(((((((((.(((&))).))))).)))))))).)).	6193	6215	1	-21.5	1	2.78e-05	0.544	0.102625	-0.173448	-7.88174	18	22	8	3UTR		1	1
hsa-miR-125b-5p	NM_001168344	RREB1	...((((((((..(((((((((&))))))))).)))))))).	8254	8273	1	-19.6	1	0.00224283	0.647	3.1281	3.83128	-11.1505	17	19	9	3UTR		1	1
hsa-miR-125b-5p	NM_001172292	NIPAL4	((((((((((............&)))))))))).	2066	2077	1	-19.3	1	0.000469819	0.529	2.03956	0.506362	-13.2236	10	11	10	3UTR		1	1
hsa-miR-125b-5p	NM_001172638	ZFP62	(((((((((((...........&))))))))))).	3227	3239	1	-20	1	0.00192345	0.662	2.0929	1.34501	-10.3988	11	12	11	3UTR		1	1
hsa-miR-125b-5p	NM_001174166	SLC16A6	(((((...(((((..((.....&))..))))).))))).	3429	3445	1	-17	1	0.0403987	0.574	3.50831	3.79492	-11.2881	12	16	5	3UTR		1	1
hsa-miR-125b-5p	NM_001190468	GDNF	..(((((((((((.((((.((.&)).)))))))))))..)))).	2437	2458	1	-22.8	1	2.79e-05	0.353	0.322825	0.790066	-5.81384	17	21	11	3UTR		1	1
hsa-miR-125b-5p	NM_001193288	SLC24A2	((((((((.((((..(((((((&)))))))....))))))))).))).	2927	2952	1	-21.9	1	0.00644221	0.456	0.110772	0.124121	-6.58625	19	25	9	3UTR		1	1
hsa-miR-125b-5p	NM_001193461	MSRB3	.(((((((((((((((.((.((&.)))).)))))))..................)))))))).	3246	3303	1	-23.4	1	0.000345644	0.426	-0.0552636	-0.0316175	-3.79332	19	40	8	3UTR		1	1
hsa-miR-125b-5p	NM_001199809	INTS7	(((((((((.((((((......&)))))).).)))))))).	3985	4003	1	-22	1	0.000607053	0.544	0	0	-5.18008	15	18	8	3UTR		1	1
hsa-miR-125b-5p	NM_001201366	DNAL1	....(((((((((.........&.))))))))).	4405	4419	1	-16.6	1	0.00559638	0.647	0	0	-11.3719	9	11	9	3UTR		1	1
hsa-miR-125b-5p	NM_001204140	MBD1	((((((((((((((((..(((.&)))....)))))))).)..)))).))).	3426	3454	1	-20.5	1	0.00489884	0.632	2.64567	3.23855	-3.93757	19	28	8	3UTR		1	1
hsa-miR-125b-5p	NM_001204142	MBD1	((((((((((((((((..(((.&)))....)))))))).)..)))).))).	1864	1892	1	-20.5	1	0.00489884	0.632	2.25823	2.29334	-3.93757	19	28	8	3UTR		1	1
hsa-miR-125b-5p	NM_001204143	MBD1	....(((((((((.....(((.&))).....))))))))).	2191	2209	1	-18.4	1	0.000553207	0.515	0.984354	1.86001	-11.3719	12	18	9	3UTR		1	1
hsa-miR-125b-5p	NM_001206844	TGOLN2	..((((((((((((((.((((.&)))).)))))))))).................)))).	4227	4264	1	-20.6	1	0.0106117	0.559	0	0	-4.957	18	37	10	3UTR		1	1
hsa-miR-125b-5p	NM_001206915	CACNB3	((((((.((((((((((((...&.))))))))))))...)))))).	2640	2679	1	-23.7	1	5.9e-05	0.426	2.1188	1.25829	-5.48126	18	23	12	3UTR		1	1
hsa-miR-125b-5p	NM_001206916	CACNB3	((((((.((((((((((((...&.))))))))))))...)))))).	2439	2478	1	-23.7	1	5.9e-05	0.426	0	0	-5.48126	18	23	12	3UTR		1	1
hsa-miR-125b-5p	NM_001206917	CACNB3	((((((.((((((((((((...&.))))))))))))...)))))).	2358	2397	1	-23.7	1	5.9e-05	0.426	0.186055	0.314725	-5.48126	18	23	12	3UTR		1	1
hsa-miR-125b-5p	NM_001243259	HINFP	..(((((..((((..((((((.&)))))))))).))))).	1357	1374	1	-19.8	1	0.00139357	0.382	0	0	-9.91931	15	17	10	3UTR		1	1
hsa-miR-125b-5p	NM_001243759	USP2	(((((((((....((((((...&))))))))))))))).	2455	2471	1	-20	1	0.000766564	0.426	4.24182	4.4896	-12.6408	15	16	15	3UTR		1	1
hsa-miR-125b-5p	NM_001243778	PRXL2A	.(((((...(((((((((.((.&.)).))))))))).))))).	4663	4702	1	-23.2	1	0.000515671	0.515	0	0	-8.70704	16	20	9	3UTR		1	1
hsa-miR-125b-5p	NM_001243779	PRXL2A	.(((((...(((((((((.((.&.)).))))))))).))))).	4747	4786	1	-23.2	1	0.000515671	0.515	0	0	-8.70704	16	20	9	3UTR		1	1
hsa-miR-125b-5p	NM_001243780	PRXL2A	.(((((...(((((((((.((.&.)).))))))))).))))).	5178	5217	1	-23.2	1	0.000515671	0.515	0	0	-8.70704	16	20	9	3UTR		1	1
hsa-miR-125b-5p	NM_001243781	PRXL2A	.(((((...(((((((((.((.&.)).))))))))).))))).	4695	4734	1	-23.2	1	0.000515671	0.515	-0.093261	-0.11784	-8.70704	16	20	9	3UTR		1	1
hsa-miR-128-3p	NM_018369	DEPDC1B	(((((((((..(((((((...&))).))))))))))))).	2081	2099	0.953846	-17.2	1	0.0181117	0.662	3.83848	2.93767	-8.00486	16	18	13	3UTR		1	1
hsa-miR-128-3p	NM_001145208	DEPDC1B	(((((((((..(((((((...&))).))))))))))))).	1895	1913	0.953846	-17.2	1	0.0181117	0.662	3.83848	2.93767	-8.00486	16	18	13	3UTR		1	1
hsa-miR-128-3p	NM_183376	ARRDC4	((((((((.(((((((((((.&))))))))..))).))))).))).	2552	2576	0.961538	-21.1	1	9.9e-06	0.588	-0.23474	0.0810406	-4.99396	19	24	8	3UTR		1	1
hsa-miR-128-3p	NM_015270	ADCY6	...(((.((((((((((((..&))))))).)))))))).	5592	5609	0.961538	-19.2	1	2e-06	0.426	-0.228427	1.29329	-8.05823	15	17	8	3UTR		1	1
hsa-miR-128-3p	NM_015646	RAP1B	((.(((((((((.(((((...&))))).)))...)))))))).	5959	5980	0.961538	-21.2	1	0.00473201	0.426	-0.126554	-0.17317	-6.78424	16	21	8	3UTR	MIRT469595	1	1
hsa-miR-128-3p	NM_018254	RCOR3	((((((((((..(((((....&.)).)))..)))))))))).	3943	3971	0.961538	-19	1	0.00804641	0.721	2.70535	2.34449	-10.1092	15	20	10	3UTR		1	1
hsa-miR-128-3p	NM_021982	SEC24A	(((((((((....(((((...&.)))))....))))))))).	3667	3703	0.961538	-20.4	1	0.00357626	0.647	1.6394	1.9535	-12.6408	14	20	9	3UTR		1	1
hsa-miR-128-3p	NM_013372	GREM1	(((((((.....((((((...&))))))..))))))).	9608	9624	0.961538	-19	1	7.32e-06	0.456	0	0	-14.7217	13	16	7	3UTR		1	1
hsa-miR-128-3p	NM_001368719	GREM1	(((((((.....((((((...&))))))..))))))).	9669	9685	0.961538	-19	1	7.32e-06	0.456	0.00891329	-0.0550428	-14.7217	13	16	7	3UTR		1	1
hsa-miR-128-3p	NM_001010942	RAP1B	((.(((((((((.(((((...&))))).)))...)))))))).	5950	5971	0.961538	-21.2	1	0.00473201	0.426	-0.126554	-0.17317	-6.78424	16	21	8	3UTR	MIRT469595	1	1
hsa-miR-128-3p	NM_001136223	RCOR3	((((((((((..(((((....&.)).)))..)))))))))).	4143	4171	0.961538	-19	1	0.00804641	0.721	2.70535	2.34449	-10.1092	15	20	10	3UTR		1	1
hsa-miR-128-3p	NM_001251917	RAP1B	((.(((((((((.(((((...&))))).)))...)))))))).	5833	5854	0.961538	-21.2	1	0.00473201	0.426	-0.126554	-0.17317	-6.78424	16	21	8	3UTR	MIRT469595	1	1
hsa-miR-128-3p	NM_001251918	RAP1B	((.(((((((((.(((((...&))))).)))...)))))))).	5824	5845	0.961538	-21.2	1	0.00473201	0.426	-0.126554	-0.17317	-6.78424	16	21	8	3UTR	MIRT469595	1	1
hsa-miR-128-3p	NM_001251921	RAP1B	((.(((((((((.(((((...&))))).)))...)))))))).	5893	5914	0.961538	-21.2	1	0.00473201	0.426	-0.126554	-0.17317	-6.78424	16	21	8	3UTR	MIRT469595	1	1
hsa-miR-128-3p	NM_001251922	RAP1B	((.(((((((((.(((((...&))))).)))...)))))))).	5809	5830	0.961538	-21.2	1	0.00473201	0.426	-0.126554	-0.17317	-6.78424	16	21	8	3UTR	MIRT469595	1	1
hsa-miR-128-3p	NM_017787	WBP1L	(((((.(((((((((((....&.)))))))))).).))))).	1848	1884	0.974359	-21.8	1	0.000115065	0.485	0.71265	-0.206958	-5.83853	16	20	10	3UTR		1	1
hsa-miR-128-3p	NM_024090	ELOVL6	...((((((.((((((((...&)))))))).)))))).	3794	3810	0.974359	-23.7	1	3.82e-07	0.559	1.29524	1.31789	-7.75705	14	16	8	3UTR		1	1
hsa-miR-128-3p	NM_001083913	WBP1L	(((((.(((((((((((....&.)))))))))).).))))).	1847	1883	0.974359	-21.8	1	0.000115065	0.485	0.71265	-0.206958	-5.83853	16	20	10	3UTR		1	1
hsa-miR-128-3p	NM_201267	NRP2	.(((((((((((((((.((((&.)))).))))))))))))))).	3954	3979	0.980769	-27.3	1	0.0801786	0.441	0.90355	0.765027	-3.79332	19	22	15	3UTR		1	1
hsa-miR-128-3p	NM_018534	NRP2	.(((((((((((((((.((((&.)))).))))))))))))))).	3969	3994	0.980769	-27.3	1	0.0801786	0.441	0.90355	0.765027	-3.79332	19	22	15	3UTR		1	1
hsa-miR-128-3p	NM_001008495	TMEM64	(((((((..(((..((((...&))))..)))))))))).	4382	4399	0.980769	-18.6	1	0.000124319	0.588	4.62927	3.37159	-9.45357	14	17	10	3UTR		1	1
hsa-miR-128-3p	NM_001254738	RND3	((((((((..(((((((((((&))))))).)))))))))))).	1447	1468	1	-22.2	1	0.000559532	0.559	1.02493	2.10033	-6.23647	19	21	12	3UTR		1	1
hsa-miR-128-3p	NM_001256627	BRSK2	((((((((..((.(((((((.&.)))).))).))..)))))))).	3862	3917	1	-23.6	1	0.000110693	0.529	-0.170678	0.053677	-7.5256	17	23	8	3UTR		1	1
hsa-miR-128-3p	NM_001256629	BRSK2	((((((((..((.(((((((.&.)))).))).))..)))))))).	3439	3494	1	-23.6	1	0.000110693	0.529	-0.170678	0.053677	-7.5256	17	23	8	3UTR		1	1
hsa-miR-128-3p	NM_001256630	BRSK2	((((((((..((.(((((((.&.)))).))).))..)))))))).	3854	3909	1	-23.6	1	0.000110693	0.529	-0.170678	0.053677	-7.5256	17	23	8	3UTR		1	1
hsa-miR-128-3p	NM_001257291	SLC9A7	((((.(((..((((((((...&)))))))).))).)))).	4488	4506	1	-23.3	1	0.000430163	0.574	0.032693	-0.0244332	-10.3555	15	18	8	3UTR		1	1
hsa-miR-128-3p	NM_001257291	SLC9A7	.(((((((((((.(((((...&))))).).)).)))))))).	4031	4051	1	-21.1	1	0.000260341	0.515	-0.248543	-0.104409	-5.08246	16	20	8	3UTR		1	1
hsa-miR-128-3p	NM_001257291	SLC9A7	(((((((...((.((((....&)))).))...))))))).	6909	6927	1	-18	1	0.000954939	0.574	0.434763	0.301721	-9.83924	13	18	7	3UTR		1	1
hsa-miR-128-3p	NM_001257994	TRMT2A	((((((((....(((((....&)))))...)))))))).	2068	2085	1	-19.1	1	0.00522925	0.397	3.1818	1.94566	-12.408	13	17	8	3UTR		1	1
hsa-miR-128-3p	NM_001265579	FAM13A	((((((((((..((((((((.&)))))))).)))........))))))).	2611	2639	1	-19.2	1	0.00495024	0.647	4.16221	3.32778	-10.1092	18	28	8	3UTR		1	1
hsa-miR-128-3p	NM_001265580	FAM13A	((((((((((..((((((((.&)))))))).)))........))))))).	2611	2639	1	-19.2	1	0.00495024	0.647	4.16221	3.32778	-10.1092	18	28	8	3UTR		1	1
hsa-miR-128-3p	NM_001278516	MDM4	.(((((((((((.((((((..&)))))).))...))))))))).	4367	4389	1	-23.7	1	0.0006818	0.544	0.228617	-0.18778	-5.08246	17	22	9	3UTR		1	1
hsa-miR-128-3p	NM_001278517	MDM4	.(((((((((((.((((((..&)))))).))...))))))))).	4141	4163	1	-23.7	1	0.0006818	0.544	0.228617	-0.18778	-5.08246	17	22	9	3UTR		1	1
hsa-miR-128-3p	NM_001278518	MDM4	.(((((((((((.((((((..&)))))).))...))))))))).	3956	3978	1	-23.7	1	0.0006818	0.544	0.228617	-0.18778	-5.08246	17	22	9	3UTR		1	1
hsa-miR-128-3p	NM_001278519	MDM4	.(((((((((((.((((((..&)))))).))...))))))))).	3766	3788	1	-23.7	1	0.0006818	0.544	0.228617	-0.18778	-5.08246	17	22	9	3UTR		1	1
hsa-miR-128-3p	NM_001278579	ACVR2A	.....((((((((((((((((&)))))))))).).))))).	4626	4645	1	-18.8	1	0.00446118	0.588	2.96239	1.86643	-13.6656	16	19	10	3UTR		1	1
hsa-miR-128-3p	NM_001278580	ACVR2A	.....((((((((((((((((&)))))))))).).))))).	4429	4448	1	-18.8	1	0.00446118	0.588	2.96239	1.86643	-13.6656	16	19	10	3UTR		1	1
hsa-miR-128-3p	NM_001281469	PTGDR	((((((((.(((((.(((((.&)))))))))).))..........................)))))).	1243	1289	1	-18.9	1	8.3e-05	0.529	0.555938	0.703126	-5.72941	18	46	10	3UTR		1	1
hsa-miR-128-3p	NM_001282218	BRSK2	((((((((..((.(((((((.&.)))).))).))..)))))))).	3434	3489	1	-23.6	1	0.000110693	0.529	-0.170678	0.053677	-7.5256	17	23	8	3UTR		1	1
hsa-miR-128-3p	NM_001282948	JMJD1C	(((((((((....(((((...&)))))..))))))))).	8255	8272	1	-19.6	1	0.000800808	0.618	1.75837	1.45004	-12.6408	14	17	9	3UTR		1	1
hsa-miR-128-3p	NM_001286455	SLC22A23	..((((....(((((((((((&)))))))))))....)))).	4143	4163	1	-22.1	1	7.83e-05	0.338	3.32672	2.69557	-11.1132	15	20	11	3UTR		1	1
hsa-miR-128-3p	NM_001288574	EYA1	...(((((((((..((((...&))))..))))))))).	3574	3590	1	-18.3	1	8.64e-06	0.544	4.23938	6.13985	-8.66051	13	16	9	3UTR		1	1
hsa-miR-128-3p	NM_001289984	JADE2	((((((((..(((((((....&)))))).)..)))))))).	4286	4305	1	-19.2	1	0.000179341	0.485	1.32084	0.50152	-6.23647	15	19	8	3UTR		1	1
hsa-miR-128-3p	NM_001303420	COLGALT2	(((((((.(((((((((((..&))))))))))).....))))))).	2153	2177	1	-23.6	1	0.00381506	0.441	0.884967	0.769112	-6.25121	18	24	11	3UTR		1	1
hsa-miR-128-3p	NM_001306199	SETD7	(((((((((((.(((((....&))))).))))))))))).	3193	3211	1	-20.2	1	0.00189799	0.529	0	0	-7.28438	16	18	11	3UTR	MIRT022071	1	1
hsa-miR-128-3p	NM_001308392	CDH11	(((((((((.((((.......&.)))).))))))))).	6045	6080	1	-17.8	1	0.00286295	0.603	4.08223	4.22697	-6.14858	13	16	9	3UTR		1	1
hsa-miR-128-3p	NM_001308445	NAA50	...((((((.((((((((((.&))))))))))...)))))).	4630	4650	1	-23.1	1	0.00156039	0.471	1.28857	1.47534	-7.75705	16	20	10	3UTR	MIRT472621	1	1
hsa-miR-128-3p	NM_030637	DDHD1	((((((((..(((((((....&.)))))))..)))))))).	12632	12674	1	-22.6	1	0.000646851	0.485	0.574386	0.569641	-6.23647	15	19	8	3UTR		1	1
hsa-miR-128-3p	NM_032504	UNC80	..((((((((((((((((((.&)))))..))))))))))))).	12927	12948	1	-21.4	1	0.000776918	0.485	0.58131	0.492123	-4.957	18	21	13	3UTR		1	1
hsa-miR-128-3p	NM_032581	FAM126A	.....(((((((((((((...&)))))))))).))).	10529	10544	1	-18.3	1	0.0157126	0.559	0.780719	0.440854	-13.6656	13	15	10	3UTR		1	1
hsa-miR-128-3p	NM_032591	SLC9A7	((((.(((..((((((((...&)))))))).))).)))).	4485	4503	1	-23.3	1	0.000430163	0.574	0.275478	-0.0222909	-10.3555	15	18	8	3UTR		1	1
hsa-miR-128-3p	NM_032591	SLC9A7	.(((((((((((.(((((...&))))).).)).)))))))).	4028	4048	1	-21.1	1	0.000260341	0.515	-0.138685	-0.135829	-5.08246	16	20	8	3UTR		1	1
hsa-miR-128-3p	NM_032591	SLC9A7	(((((((...((.((((....&)))).))...))))))).	6906	6924	1	-18	1	0.000954939	0.574	0.69099	0.306032	-9.83924	13	18	7	3UTR		1	1
hsa-miR-128-3p	NM_033260	FOXQ1	.(((((((((((((((.....&)))))..).))))))))).	2325	2344	1	-19.6	1	0.00933282	0.632	2.10167	0.911888	-3.79332	15	19	9	3UTR		1	1
hsa-miR-128-3p	NM_052837	SCAMP3	(((((((((((...(((((..&.)))))))))))))))).	1299	1346	1	-21	1	7.23e-06	0.382	1.07987	0.381	-9.43035	16	18	16	3UTR		1	1
hsa-miR-128-3p	NM_052906	ELFN2	((((((((.((((.(((((((&.)))))).).)))).)))))))).	4244	4286	1	-25.6	1	0.000128958	0.324	0.13071	-0.491176	-5.8508	19	24	8	3UTR		1	1
hsa-miR-128-3p	NM_080621	SAMD10	...(((((.(((((((((...&)))))))))))))).	1882	1897	1	-22.8	1	0.000841678	0.426	2.78207	2.39723	-7.57093	14	15	14	3UTR		1	1
hsa-miR-128-3p	NM_134442	CREB1	.(((((((....((((((...&))))))....))))))).	8967	8985	1	-18.8	1	0.00199537	0.632	-0.153179	-0.00351071	-12.2638	13	18	7	3UTR		1	1
hsa-miR-128-3p	NM_138473	SP1	((((((.((.((((((((((.&))))))))).).)).)))))).	6428	6450	1	-21.6	1	0.000730936	0.5	1.86414	1.62766	-6.72377	18	22	9	3UTR	MIRT405401	1	1
hsa-miR-128-3p	NM_138473	SP1	((((((.((((((((((((((&)))))))))))................))).)))))).	3945	3983	1	-21.2	1	0.000398361	0.603	1.40692	1.89879	-5.48126	20	38	11	3UTR	MIRT405401	1	1
hsa-miR-128-3p	NM_152305	POGLUT1	((((((.((((((((((((..&)))))))).)))).............)))))).	2641	2674	1	-21.8	1	0.000562291	0.544	0.0463305	0.0514728	-5.48126	18	33	8	3UTR		1	1
hsa-miR-128-3p	NM_153035	TCEANC2	(((((((((((((..((((((&))))))...)))..)))))))))).	1093	1118	1	-21.2	1	0.000653954	0.515	1.40417	1.22284	-5.52986	19	25	10	3UTR		1	1
hsa-miR-128-3p	NM_153035	TCEANC2	.....(((..(((((((((((&)))))))))))..))).	1794	1811	1	-20	1	0.00968315	0.529	-0.0595617	0.0738816	-15.9645	14	17	11	3UTR		1	1
hsa-miR-128-3p	NM_153646	SLC24A4	.((((((((.((.((((((..&)))))).))...)))))))).	8609	8630	1	-22	1	0.000347164	0.574	-0.365071	0.0789899	-6.32496	16	21	8	3UTR		1	1
hsa-miR-128-3p	NM_153646	SLC24A4	((((((.((((((.((((((.&)))))..).)))))))))))).	5431	5453	1	-20.1	1	5.34e-06	0.515	0.0610245	-0.273182	-6.3381	18	22	12	3UTR		1	1
hsa-miR-128-3p	NM_153647	SLC24A4	.((((((((.((.((((((..&)))))).))...)))))))).	8010	8031	1	-22	1	0.000347164	0.574	-0.365071	0.0789899	-6.32496	16	21	8	3UTR		1	1
hsa-miR-128-3p	NM_153647	SLC24A4	((((((.((((((.((((((.&)))))..).)))))))))))).	4832	4854	1	-20.1	1	5.34e-06	0.515	0.0610245	-0.273182	-6.3381	18	22	12	3UTR		1	1
hsa-miR-128-3p	NM_153648	SLC24A4	.((((((((.((.((((((..&)))))).))...)))))))).	7868	7889	1	-22	1	0.000347164	0.574	-0.365071	0.0789899	-6.32496	16	21	8	3UTR		1	1
hsa-miR-128-3p	NM_153648	SLC24A4	((((((.((((((.((((((.&)))))..).)))))))))))).	4690	4712	1	-20.1	1	5.34e-06	0.515	0.0610245	-0.273182	-6.3381	18	22	12	3UTR		1	1
hsa-miR-128-3p	NM_172058	EYA1	...(((((((((..((((...&))))..))))))))).	3364	3380	1	-18.3	1	8.64e-06	0.544	6.44483	6.08708	-8.66051	13	16	9	3UTR		1	1
hsa-miR-128-3p	NM_172059	EYA1	...(((((((((..((((...&))))..))))))))).	3359	3375	1	-18.3	1	8.64e-06	0.544	4.83907	5.38172	-8.66051	13	16	9	3UTR		1	1
hsa-miR-128-3p	NM_173468	MOB1B	.(((((.((((((((((....&))))))))))))))).	1131	1147	1	-17.9	1	0.00035345	0.588	1.80789	1.32438	-5.33701	15	16	15	3UTR	MIRT022073	1	1
hsa-miR-128-3p	NM_173569	UBN2	..(((((((((((((((....&)))))))))))...)))).	5917	5936	1	-19.2	1	0.00535632	0.647	0.497664	0.860428	-4.957	15	19	11	3UTR		1	1
hsa-miR-128-3p	NM_174916	UBR1	((((((((((((((.......&)))))))))))))).	7503	7518	1	-22	1	0.000899812	0.662	2.4553	3.11211	-4.90607	14	15	14	3UTR		1	1
hsa-miR-128-3p	NM_181453	GCC2	(((((((..((.((((((...&.)))))).))..))))))).	5550	5595	1	-21.7	1	7.09e-05	0.426	0.358545	0.0559979	-10.6544	15	20	7	3UTR	MIRT021983	1	1
hsa-miR-128-3p	NM_181504	PIK3R1	(((((((((..(((.(((...&))))))))))))))).	4778	4794	1	-18.4	1	9.29e-05	0.574	2.7944	1.763	-8.7403	15	16	15	3UTR	MIRT733521	1	1
hsa-miR-128-3p	NM_181523	PIK3R1	(((((((((..(((.(((...&))))))))))))))).	6103	6119	1	-18.4	1	9.29e-05	0.574	2.7944	1.763	-8.7403	15	16	15	3UTR	MIRT733521	1	1
hsa-miR-128-3p	NM_181524	PIK3R1	(((((((((..(((.(((...&))))))))))))))).	4840	4856	1	-18.4	1	9.29e-05	0.574	2.7944	1.763	-8.7403	15	16	15	3UTR	MIRT733521	1	1
hsa-miR-128-3p	NM_182587	UNC80	..((((((((((((((((((.&)))))..))))))))))))).	12855	12876	1	-21.4	1	0.000776918	0.485	0.323175	0.194107	-4.957	18	21	13	3UTR		1	1
hsa-miR-128-3p	NM_182588	RGPD4	(((((((..((.((((((...&.)))))).))..))))))).	5883	5928	1	-21.8	1	5.22e-05	0.456	0.496741	0.110083	-10.6544	15	20	7	3UTR	MIRT297085	1	1
hsa-miR-128-3p	NM_194285	SPTY2D1	........(((((((((((((&))))))))))))).	5295	5309	1	-19.1	0	0.0249619	0.75	3.44461	4.10619	-19.4239	13	14	13	3UTR		1	1
hsa-miR-128-3p	NM_194285	SPTY2D1	.(((((((.(((.((((....&))))..)))))))))).	2872	2889	1	-18.5	1	0.00165153	0.691	0.997344	1.05075	-6.13885	14	17	10	3UTR		1	1
hsa-miR-128-3p	NM_199246	CCNG1	(((((((..(((..((((...&)))).)))..))))))).	1247	1265	1	-19.3	1	0.000329343	0.676	3.04507	0.960471	-9.45357	14	18	7	3UTR		1	1
hsa-miR-128-3p	NM_199351	ILDR2	...((((..((((((((((((&)))))))))))))))).	8492	8509	1	-19.7	1	0.00101993	0.559	-0.0150674	0.158862	-9.88456	16	17	16	3UTR		1	1
hsa-miR-128-3p	NM_201267	NRP2	..(((((((((((((((((..&))))))))))))))).)).	3803	3822	1	-25.6	1	0.0026205	0.5	1.40357	1.41119	-4.957	17	19	15	3UTR		1	1
hsa-miR-128-3p	NM_203394	E2F7	(((((((.....(((((....&)))))......))))))).	3613	3632	1	-16	1	0.13054	0.618	2.49751	0.949626	-14.7217	12	19	7	3UTR	MIRT022069	1	1
hsa-miR-128-3p	NM_213569	NEBL	((((((((((.((((......&)))))))))))))).	2656	2671	1	-18.4	1	7.83e-05	0.485	0.30859	0.136924	-6.9954	14	15	14	3UTR		1	1
hsa-miR-128-3p	NM_213654	ARMC8	((((((((..((.........&))..)))))))).	2435	2448	1	-16.3	1	6.57e-05	0.647	0.704894	0.343926	-9.35094	10	13	8	3UTR		1	1
hsa-miR-128-3p	XM_005246469	GPD2	((((((((((((((.......&.)).))).))))))))).	3970	3998	1	-19.3	1	0.000494324	0.647	0	0	-4.90607	14	18	9	3UTR		1	1
hsa-miR-128-3p	XM_005257083	WIPF2	((((((((..(((((......&))))).)))))))).	3527	3542	1	-19.8	1	2.36e-05	0.485	0	0	-6.46952	13	15	8	3UTR		1	1
hsa-miR-128-3p	XM_005257084	WIPF2	((((((((..(((((......&))))).)))))))).	3485	3500	1	-19.8	1	2.36e-05	0.485	0	0	-6.46952	13	15	8	3UTR		1	1
hsa-miR-128-3p	XM_005267992	NPAS3	(((...(((((((((((((((&)))))))))))))))...))).	4083	4105	1	-19.6	1	0.0100131	0.618	0	0	-12.9896	18	22	15	3UTR		1	1
hsa-miR-128-3p	XM_005269379	PPIF	((((((((.(((((.......&))))))))))))).	1336	1350	1	-17.4	1	0.00888814	0.485	0	0	-5.96246	13	14	13	3UTR	MIRT470531	1	1
hsa-miR-128-3p	XM_005271945	JADE2	((((((((..(((((((....&)))))).)..)))))))).	4425	4444	1	-19.2	1	0.000179341	0.485	0	0	-6.23647	15	19	8	3UTR		1	1
hsa-miR-128-3p	XM_006710441	EPHB2	(((((((((((((((((....&))))).))....)))))))))).	4684	4707	1	-21.9	1	0.000699798	0.368	0	0	-3.93757	17	23	10	3UTR	MIRT438670	1	1
hsa-miR-128-3p	XM_006713451	NR1D2	(((((((((((.((((((...&)))))).).)))))))))).	3297	3317	1	-20	1	0.000102342	0.691	0	0	-7.28438	17	20	10	3UTR	MIRT120697	1	1
hsa-miR-128-3p	XM_011509654	POU2F1	((((((.((((.((((((...&))))))..)))))))))).	3343	3362	1	-21.7	1	6.09e-05	0.515	0	0	-8.82806	16	19	10	3UTR		1	1
hsa-miR-128-3p	XM_011509654	POU2F1	...((((((.(((((((....&))))))).)))))).	4125	4140	1	-19.8	1	0.000294126	0.603	0	0	-7.75705	13	15	7	3UTR		1	1
hsa-miR-128-3p	XM_011510978	GPD2	((((((((((((((.......&.)).))).))))))))).	4075	4103	1	-19.3	1	0.000494324	0.647	0	0	-4.90607	14	18	9	3UTR		1	1
hsa-miR-128-3p	XM_011535818	LIN28B	..((((((...((((((((((&))))))))))...)))))).	5339	5359	1	-20.6	1	0.00304144	0.529	0	0	-10.0807	16	20	10	3UTR		1	1
hsa-miR-128-3p	XM_011537071	NPAS3	(((...(((((((((((((((&)))))))))))))))...))).	3987	4009	1	-19.6	1	0.0100131	0.618	0	0	-12.9896	18	22	15	3UTR		1	1
hsa-miR-128-3p	XM_011538095	ABCB9	(((((((((((.(((......&))).)).))))))))).	3437	3454	1	-18	1	0.00567595	0.426	0	0	-7.51743	14	17	9	3UTR		1	1
hsa-miR-128-3p	XM_017003888	UNC80	..((((((((((((((((((.&)))))..))))))))))))).	12760	12781	1	-21.4	1	0.000776918	0.485	0	0	-4.957	18	21	13	3UTR		1	1
hsa-miR-128-3p	XM_017011524	RIPOR2	...((((((((((((((((..&)))))))))).................)))))).	3145	3179	1	-18.8	1	0.016422	0.662	0	0	-6.51454	16	34	10	3UTR		1	1
hsa-miR-128-3p	XM_017011525	RIPOR2	...((((((((((((((((..&)))))))))).................)))))).	3137	3171	1	-18.8	1	0.016422	0.662	0	0	-6.51454	16	34	10	3UTR		1	1
hsa-miR-128-3p	XM_017014217	NEK6	.(((((...(((((((((((.&))))))))).))...))))).	1681	1702	1	-20.6	1	0.0617305	0.529	0	0	-8.70704	16	21	9	3UTR		1	1
hsa-miR-128-3p	XM_024447883	JMJD1C	(((((((((....(((((...&)))))..))))))))).	7601	7618	1	-19.6	1	0.000800808	0.618	0	0	-12.6408	14	17	9	3UTR		1	1
hsa-miR-128-3p	XM_024448315	ENAH	(((((((((...((((.....&))))...))))))))).	13576	13593	1	-19.3	1	6.15e-06	0.412	0	0	-11.3517	13	17	9	3UTR		1	1
hsa-miR-128-3p	XM_024448724	TMEM25	((((((((((((((.......&))))..)))))))))).	2181	2198	1	-18.8	1	0.000909632	0.456	0	0	-4.90607	14	17	10	3UTR		1	1
hsa-miR-128-3p	NM_014603	CDR2L	((((((((..((((.......&))))....)))))))).	3252	3269	1	-19.4	1	0.000386732	0.382	1.55046	0.519087	-7.20497	12	17	8	3UTR		1	1
hsa-miR-128-3p	NM_015088	TNRC6B	.(((((((((((((.((((((&.)))))))))))))))...)))).	15097	15138	1	-22	1	0.000136586	0.426	0.72248	0.427158	-4.52877	19	24	15	3UTR		1	1
hsa-miR-128-3p	NM_015101	COLGALT2	((((((((((.((((((....&))))))))).))))))).	4573	4591	1	-19.1	1	0.00145087	0.603	2.49385	3.05964	-6.76235	16	18	9	3UTR		1	1
hsa-miR-128-3p	NM_015278	SASH1	.(((((((((..((((((((.&)))))..)))..))))))))).	4001	4023	1	-19.8	1	0.0848659	0.515	2.05242	0.850461	-9.9649	17	22	9	3UTR		1	1
hsa-miR-128-3p	NM_015288	JADE2	((((((((..(((((((....&)))))).)..)))))))).	4120	4139	1	-19.2	1	0.000179341	0.485	1.32084	0.50152	-6.23647	15	19	8	3UTR		1	1
hsa-miR-128-3p	NM_015459	ATL3	.....(((((.((((((((((&)))))))))).))))).	6052	6069	1	-17.8	1	0.00822825	0.559	4.91234	3.98825	-16.4904	15	17	10	3UTR		1	1
hsa-miR-128-3p	NM_016470	OSER1	((((.((...((((((((...&))))))))..)).)))).	1264	1282	1	-18.5	1	5.75e-05	0.618	1.49716	3.19573	-12.6691	14	18	8	3UTR		1	1
hsa-miR-128-3p	NM_016593	CYP39A1	...(((((..(((((((((..&)))))))))..))).)).	1843	1861	1	-18.1	1	0.000289504	0.676	0.364664	1.43743	-8.81344	14	18	9	3UTR		1	1
hsa-miR-128-3p	NM_017759	INO80D	...((((((((((((((((((&)))))))))))............))))))).	13233	13264	1	-19.8	1	0.000214876	0.574	0	0	-6.51454	18	31	11	3UTR	MIRT045886	1	1
hsa-miR-128-3p	NM_017787	WBP1L	.((((((...(((((((((((&))))))))))).)))))).	1527	1546	1	-22.5	1	0.000179717	0.5	0.357004	0.445822	-8.40586	17	19	11	3UTR		1	1
hsa-miR-128-3p	NM_018212	ENAH	(((((((((...((((.....&))))...))))))))).	12855	12872	1	-19.3	1	6.15e-06	0.412	-0.0678278	0.181547	-11.3517	13	17	9	3UTR		1	1
hsa-miR-128-3p	NM_018407	LAPTM4B	((((((((..(((((......&)))))..)))))))).	1073	1089	1	-18.6	1	0.0158401	0.632	0.493607	0.344344	-6.46952	13	16	8	3UTR		1	1
hsa-miR-128-3p	NM_018534	NRP2	..(((((((((((((((((..&))))))))))))))).)).	3818	3837	1	-25.6	1	0.0026205	0.5	1.40357	1.41119	-4.957	17	19	15	3UTR		1	1
hsa-miR-128-3p	NM_019624	ABCB9	(((((((((((.(((......&))).)).))))))))).	3039	3056	1	-18	1	0.00567595	0.426	2.08814	2.28517	-7.51743	14	17	9	3UTR		1	1
hsa-miR-128-3p	NM_019625	ABCB9	(((((((((((.(((......&))).)).))))))))).	3168	3185	1	-18	1	0.00567595	0.426	2.08814	2.28517	-7.51743	14	17	9	3UTR		1	1
hsa-miR-128-3p	NM_020130	TCIM	((.((((...(((((((((((&))))))))))).)))))).	505	524	1	-22.1	1	0.000408226	0.426	0.277689	0.210464	-10.1076	17	19	11	3UTR	MIRT021971	1	1
hsa-miR-128-3p	NM_020335	VANGL2	...((((((...(((((((((&)))))))))....)))))).	2866	2886	1	-20.3	1	0.159539	0.485	0.0617134	-0.056934	-13.9286	15	20	9	3UTR		1	1
hsa-miR-128-3p	NM_020342	SLC39A10	..((((((.(((((((((((.&)))))))))))......)))))).	2702	2726	1	-19.2	1	0.00376141	0.559	0.721331	1.03274	-6.01339	17	24	11	3UTR		1	1
hsa-miR-128-3p	NM_020457	THAP11	.(((((...((((((((((..&))))))))))....))))).	1648	1668	1	-21	1	0.00210544	0.485	1.7189	0.6646	-8.70704	15	20	10	3UTR		1	1
hsa-miR-128-3p	NM_020860	STIM2	((((((((((..(((((....&))))))))))))))).	3329	3345	1	-18.5	1	0.000840849	0.603	5.29266	2.40571	-10.1092	15	16	15	3UTR		1	1
hsa-miR-128-3p	NM_022740	HIPK2	((((..(((((((((((((((&)))))))))))..)))).)))).	12540	12563	1	-22.5	1	5.25e-05	0.426	4.07446	4.46483	-9.95757	19	23	11	3UTR		1	1
hsa-miR-128-3p	NM_024989	PGAP1	(((((.((((((.........&)))))).))))).	7022	7035	1	-18.3	1	0.0125481	0.676	0.195204	0.187817	-8.953	11	13	6	3UTR		1	1
hsa-miR-128-3p	NM_025146	NAA50	...((((((.((((((((((.&))))))))))...)))))).	4633	4653	1	-23.1	1	0.00156039	0.471	1.11966	1.44936	-7.75705	16	20	10	3UTR	MIRT472621	1	1
hsa-miR-128-3p	NM_025151	RAB11FIP1	(((.((((((((.(((((...&))))).)))...)))))))).	4302	4323	1	-18.8	1	0.00136403	0.412	0.472468	2.80372	-8.25873	16	21	8	3UTR		1	1
hsa-miR-128-3p	NM_002393	MDM4	.(((((((((((.((((((..&)))))).))...))))))))).	4435	4457	1	-23.7	1	0.0006818	0.544	-0.129209	-0.144935	-5.08246	17	22	9	3UTR		1	1
hsa-miR-128-3p	NM_002499	NEO1	((((((.(.((((((((((((&))))))))).....)))))))))).	5420	5445	1	-19.3	1	0.00492878	0.559	1.80193	1.73597	-6.53765	19	25	10	3UTR		1	1
hsa-miR-128-3p	NM_002581	PAPPA	((.(((((..((((((.(((.&))).))))))..))))).)).	8141	8162	1	-22.1	1	0.0065287	0.485	-0.0108895	0.34379	-7.79401	16	21	6	3UTR		1	1
hsa-miR-128-3p	NM_002581	PAPPA	(((((.(.((((..(((((((&)))))))..)))).).))))).	6892	6914	1	-20.7	1	0.00860934	0.559	0.163196	0.349916	-10.2981	17	22	7	3UTR		1	1
hsa-miR-128-3p	NM_002697	POU2F1	...((((((.(((((((....&))))))).)))))).	4054	4069	1	-19.8	1	0.000294126	0.603	1.28348	0.511019	-7.75705	13	15	7	3UTR		1	1
hsa-miR-128-3p	NM_002837	PTPRB	.(((((((((((((.((((((&))))))...))))..........))))))))).	6214	6247	1	-20.1	1	0.0015957	0.647	4.8916	5.19828	-4.52877	19	33	9	3UTR		1	1
hsa-miR-128-3p	NM_003109	SP1	((((((.((.((((((((((.&))))))))).).)).)))))).	6346	6368	1	-21.6	1	0.000730936	0.5	1.86414	1.62766	-6.72377	18	22	9	3UTR	MIRT405401	1	1
hsa-miR-128-3p	NM_003109	SP1	((((((.((((((((((((((&)))))))))))................))).)))))).	3863	3901	1	-21.2	1	0.000398361	0.603	1.40692	1.89879	-5.48126	20	38	11	3UTR	MIRT405401	1	1
hsa-miR-128-3p	NM_003957	BRSK2	((((((((..((.(((((((.&.)))).))).))..)))))))).	3392	3447	1	-23.6	1	0.000110693	0.529	-0.170678	0.053677	-7.5256	17	23	8	3UTR		1	1
hsa-miR-128-3p	NM_004060	CCNG1	(((((((..(((..((((...&.)))).)))..))))))).	1341	1365	1	-19.3	1	0.000329343	0.676	1.68015	0.976534	-9.45357	14	19	7	3UTR		1	1
hsa-miR-128-3p	NM_004379	CREB1	.(((((((....((((((...&))))))....))))))).	8925	8943	1	-18.8	1	0.00199537	0.632	-0.153179	-0.00351071	-12.2638	13	18	7	3UTR		1	1
hsa-miR-128-3p	NM_004434	EML1	((((((((.((((((......&)))...))))))))))).	2567	2585	1	-17.2	1	0.00876992	0.647	3.14799	1.29096	-5.22701	14	18	11	3UTR		1	1
hsa-miR-128-3p	NM_004755	RPS6KA5	(((((.((.(((((((((((.&)))))))))))))))))).	7630	7649	1	-23.1	1	0.0293067	0.647	-0.379202	-0.0437079	-6.89492	18	19	18	3UTR	MIRT022082	1	1
hsa-miR-128-3p	NM_005126	NR1D2	(((((((((((.((((((...&)))))).).)))))))))).	3747	3767	1	-20	1	0.000102342	0.691	1.93865	1.515	-7.28438	17	20	10	3UTR	MIRT120697	1	1
hsa-miR-128-3p	NM_005168	RND3	((((((((..(((((((((((&))))))).)))))))))))).	1326	1347	1	-22.2	1	0.000559532	0.559	2.95695	2.47963	-6.23647	19	21	12	3UTR		1	1
hsa-miR-128-3p	NM_005197	FOXN3	.((((.((((((.(((.((((&)))).))))))))))))).	5272	5291	1	-17.7	1	0.000189902	0.515	2.0523	1.80873	-6.98341	17	19	13	3UTR		1	1
hsa-miR-128-3p	NM_005342	HMGB3	((((((((.((((((((((((&))))))))))...........)).)))))))).	1131	1164	1	-22.8	1	0.000433346	0.397	2.02788	2.08811	-4.99396	20	33	10	3UTR		1	1
hsa-miR-128-3p	NM_005698	SCAMP3	(((((((((((...(((((..&.)))))))))))))))).	1377	1424	1	-21	1	7.23e-06	0.382	1.04812	0.404513	-9.43035	16	18	16	3UTR		1	1
hsa-miR-128-3p	NM_005729	PPIF	((((((((.(((((.......&))))))))))))).	1274	1288	1	-17.4	1	0.00888814	0.485	1.4211	0.0196787	-5.96246	13	14	13	3UTR	MIRT470531	1	1
hsa-miR-128-3p	NM_005905	SMAD9	.(((((((((((.(((((...&))))).).)).)))))))).	3804	3824	1	-21.1	1	0.000265484	0.574	0.464185	2.55249	-5.08246	16	20	8	3UTR		1	1
hsa-miR-128-3p	NM_006362	NXF1	(((((((.(..(((((((...&))))))).....).))))))).	2035	2057	1	-21.3	1	0.065399	0.294	3.92888	1.98717	-10.3185	15	22	7	3UTR		1	1
hsa-miR-128-3p	NM_007067	KAT7	(((((((((.(((((((((((&)))))))))))...........................))))))))).	4134	4182	1	-25	1	2.76e-05	0.544	0.0692227	-0.0386707	-5.18008	20	48	11	3UTR	MIRT234479	1	1
hsa-miR-128-3p	NM_013233	STK39	......(((((((((((((((&))))))))))).)))).	1927	1944	1	-21.3	0	0.00191174	0.676	4.38573	4.61398	-15.5666	15	17	11	3UTR		1	1
hsa-miR-128-3p	NM_014154	ARMC8	((((((((..((.........&))..)))))))).	2381	2394	1	-16.3	1	6.57e-05	0.647	0.704894	0.343926	-9.35094	10	13	8	3UTR		1	1
hsa-miR-128-3p	NM_014397	NEK6	.(((((...(((((((((((.&))))))))).))...))))).	1475	1496	1	-20.6	1	0.0617305	0.529	1.05585	1.11675	-8.70704	16	21	9	3UTR		1	1
hsa-miR-128-3p	NM_001322237	RPS6KA5	(((((.((.(((((((((((.&)))))))))))))))))).	7427	7446	1	-23.1	1	0.0293067	0.647	0.279192	0.123634	-6.89492	18	19	18	3UTR	MIRT022082	1	1
hsa-miR-128-3p	NM_001322237	RPS6KA5	((((((((..((((((.....&)))))).)))))))).	13294	13310	1	-21.1	1	0.000417181	0.515	-0.0353466	-0.0845913	-6.23647	14	16	8	3UTR	MIRT022082	1	1
hsa-miR-128-3p	NM_001330079	NRXN1	((((..((.(((((((((...&))))))))).))..)))).	2036	2055	1	-21.7	1	0.0134716	0.603	0.423094	-0.0647157	-11.014	15	19	9	3UTR		1	1
hsa-miR-128-3p	NM_001330081	NRXN1	((((..((.(((((((((...&))))))))).))..)))).	2039	2058	1	-21.7	1	0.0134716	0.603	0.194879	-0.114352	-11.014	15	19	9	3UTR		1	1
hsa-miR-128-3p	NM_001330204	PTPRB	.(((((((((((((.((((((&))))))...))))..........))))))))).	6428	6461	1	-20.1	1	0.0015957	0.647	3.54921	4.72123	-4.52877	19	33	9	3UTR		1	1
hsa-miR-128-3p	NM_001330576	CDH11	(((((((((.((((.......&.)))).))))))))).	5466	5501	1	-17.8	1	0.00286295	0.603	4.77698	5.30452	-6.14858	13	16	9	3UTR		1	1
hsa-miR-128-3p	NM_001331025	ERG	((((((((..(.(((((((..&))))..))).)..)))))))).	3383	3405	1	-20	1	6.52e-05	0.485	4.84605	3.87085	-9.58327	16	22	8	3UTR		1	1
hsa-miR-128-3p	NM_001348800	ZBTB20	.((((((((((((((((....&.)))))..))))))))))).	7309	7357	1	-20.7	1	0.00175015	0.647	2.01288	1.53589	-3.79332	16	20	11	3UTR	MIRT498022	1	1
hsa-miR-128-3p	NM_001364022	CCNG1	(((((((..(((..((((...&.)))).)))..))))))).	1101	1125	1	-19.3	1	0.000329343	0.676	1.68015	0.976534	-9.45357	14	19	7	3UTR		1	1
hsa-miR-128-3p	NM_001365848	POU2F1	...((((((.(((((((....&))))))).)))))).	4548	4563	1	-19.8	1	0.000294126	0.603	1.28348	0.511019	-7.75705	13	15	7	3UTR		1	1
hsa-miR-128-3p	NM_001368719	GREM1	...((((((((((((((((..&))))))))))....)))))).	6117	6138	1	-18.6	1	0.0115117	0.559	0.607057	0.172571	-6.51454	16	21	10	3UTR		1	1
hsa-miR-128-3p	NM_001370333	EYA1	...(((((((((..((((...&))))..))))))))).	3505	3521	1	-18.3	1	8.64e-06	0.544	5.12994	5.81639	-8.66051	13	16	9	3UTR		1	1
hsa-miR-128-3p	NM_001370334	EYA1	...(((((((((..((((...&))))..))))))))).	3538	3554	1	-18.3	1	8.64e-06	0.544	5.88478	5.64715	-8.66051	13	16	9	3UTR		1	1
hsa-miR-128-3p	NM_001370336	EYA1	...(((((((((..((((...&))))..))))))))).	3397	3413	1	-18.3	1	8.64e-06	0.544	5.12994	5.81639	-8.66051	13	16	9	3UTR		1	1
hsa-miR-128-3p	NM_001371427	CREB1	.(((((((....((((((...&))))))....))))))).	8809	8827	1	-18.8	1	0.00199537	0.632	-0.153179	-0.00351071	-12.2638	13	18	7	3UTR		1	1
hsa-miR-128-3p	NM_001371428	CREB1	.(((((((....((((((...&))))))....))))))).	8764	8782	1	-18.8	1	0.00199537	0.632	-0.153179	-0.00351071	-12.2638	13	18	7	3UTR		1	1
hsa-miR-128-3p	NM_001371986	UNC80	..((((((((((((((((((.&)))))..))))))))))))).	13125	13146	1	-21.4	1	0.000776918	0.485	0.323175	0.194107	-4.957	18	21	13	3UTR		1	1
hsa-miR-128-3p	NM_001377327	NEBL	....((((((((((((((...&)))))))).)))))).	4895	4911	1	-20.8	1	0.000114702	0.691	0.620189	1.00188	-9.54656	14	16	8	3UTR		1	1
hsa-miR-128-3p	NM_001377327	NEBL	((((((((((.((((......&)))))))))))))).	2620	2635	1	-18.4	1	7.83e-05	0.485	0.0797023	0.238447	-6.9954	14	15	14	3UTR		1	1
hsa-miR-128-3p	NM_001377328	NEBL	....((((((((((((((...&)))))))).)))))).	4600	4616	1	-20.8	1	0.000114702	0.691	-0.353263	0.0829132	-9.54656	14	16	8	3UTR		1	1
hsa-miR-128-3p	NM_001377328	NEBL	((((((((((.((((......&)))))))))))))).	2325	2340	1	-18.4	1	7.83e-05	0.485	0.537477	1.23063	-6.9954	14	15	14	3UTR		1	1
hsa-miR-128-3p	NM_001378620	SLC24A4	.((((((((.((.((((((..&)))))).))...)))))))).	8067	8088	1	-22	1	0.000347164	0.574	-0.365071	0.0789899	-6.32496	16	21	8	3UTR		1	1
hsa-miR-128-3p	NM_001378620	SLC24A4	((((((.((((((.((((((.&)))))..).)))))))))))).	4889	4911	1	-20.1	1	5.34e-06	0.515	0.0610245	-0.273182	-6.3381	18	22	12	3UTR		1	1
hsa-miR-128-3p	NM_001382445	HIP1	(((((((((((.((((((...&.))))))...))....))))))))).	4905	4940	1	-20.8	1	0.0173196	0.441	1.22131	2.57683	-7.28438	17	26	9	3UTR		1	1
hsa-miR-128-3p	NM_001616	ACVR2A	.....((((((((((((((((&)))))))))).).))))).	4481	4500	1	-18.8	1	0.00446118	0.588	2.96239	1.86643	-13.6656	16	19	10	3UTR		1	1
hsa-miR-128-3p	NM_001797	CDH11	(((((((((.((((.......&.)))).))))))))).	5866	5901	1	-17.8	1	0.00286295	0.603	4.08223	4.22697	-6.14858	13	16	9	3UTR		1	1
hsa-miR-128-3p	NM_002093	GSK3B	....((((((((((((((...&)))))))))).)))).	5413	5429	1	-21.1	1	0.00540537	0.544	3.4596	3.19097	-9.54656	14	16	10	3UTR		1	1
hsa-miR-128-3p	NM_002233	KCNA4	(((((((.....(((((((((&)))))))))....))))))).	3974	3995	1	-20.6	1	0.00539899	0.676	0.496567	0.548344	-14.7217	16	21	9	3UTR		1	1
hsa-miR-128-3p	NM_000217	KCNA1	.....((((((((((((....&.)))))))))))).	3154	3188	1	-20.9	1	0.0256923	0.647	0.36745	1.34292	-13.6656	12	14	12	3UTR		1	1
hsa-miR-128-3p	NM_000408	GPD2	((((((((((((((.......&.)).))).))))))))).	4040	4068	1	-19.3	1	0.000494324	0.647	0.505794	0.648462	-4.90607	14	18	9	3UTR		1	1
hsa-miR-128-3p	NM_000503	EYA1	...(((((((((..((((...&))))..))))))))).	3592	3608	1	-18.3	1	8.64e-06	0.544	4.23938	6.13985	-8.66051	13	16	9	3UTR		1	1
hsa-miR-128-3p	NM_001001664	SPOPL	((((((((..(((((......&)))))..)))))))).	3758	3774	1	-18.5	1	0.000638487	0.618	0.942703	0.853748	-6.46952	13	16	8	3UTR		1	1
hsa-miR-128-3p	NM_001008493	ENAH	(((((((((...((((.....&))))...))))))))).	12918	12935	1	-19.3	1	6.15e-06	0.412	-0.0678278	0.181547	-11.3517	13	17	9	3UTR		1	1
hsa-miR-128-3p	NM_001008707	EML1	((((((((.((((((......&)))...))))))))))).	2624	2642	1	-17.2	1	0.00876992	0.647	3.14799	1.29096	-5.22701	14	18	11	3UTR		1	1
hsa-miR-128-3p	NM_001009984	C20orf194	((((((((.((((........&.)))).)))))))).	5857	5886	1	-19.5	1	6.84e-05	0.368	3.84391	3.81563	-6.8193	12	15	8	3UTR		1	1
hsa-miR-128-3p	NM_001013699	H3-5	(((((((((...((((.....&.)))).....))))))))).	912	937	1	-18.5	1	0.0115322	0.588	3.67174	3.18303	-11.3517	13	20	9	3UTR	MIRT572021	1	1
hsa-miR-128-3p	NM_001024843	TNRC6B	.(((((((((((((.((((((&.)))))))))))))))...)))).	13089	13130	1	-22	1	0.000136586	0.426	0.411614	0.495548	-4.52877	19	24	15	3UTR		1	1
hsa-miR-128-3p	NM_001029858	SLC35F1	.(((.(((((((.((((((..&)))))).))..))))).))).	3061	3082	1	-19.4	1	0.000369779	0.574	-0.0797317	-0.0335792	-9.20149	16	21	6	3UTR		1	1
hsa-miR-128-3p	NM_001032296	STK24	..((((((((((.(((((...&.))))).)))))))))).	4076	4100	1	-25	1	4.83e-06	0.412	0.891502	0.311034	-6.24613	15	18	10	3UTR		1	1
hsa-miR-128-3p	NM_001033723	ZNF704	...((((.(((((((((((..&))))))).))))..)))).	8130	8149	1	-19.9	1	0.00209092	0.485	0.530972	0.517869	-8.82818	15	19	7	3UTR		1	1
hsa-miR-128-3p	NM_001033723	ZNF704	((((((((..(((((......&)))).)..)))))))).	8631	8648	1	-19	1	0.00332666	0.471	0.083551	-0.0487577	-6.46952	13	17	8	3UTR		1	1
hsa-miR-128-3p	NM_001081491	NXF1	(((((((.(..(((((((...&))))))).....).))))))).	3836	3858	1	-21.3	1	0.065399	0.294	3.92888	1.98717	-10.3185	15	22	7	3UTR		1	1
hsa-miR-128-3p	NM_001083112	GPD2	((((((((((((((.......&.)).))).))))))))).	4158	4186	1	-19.3	1	0.000494324	0.647	0.505794	0.648462	-4.90607	14	18	9	3UTR		1	1
hsa-miR-128-3p	NM_001083913	WBP1L	.((((((...(((((((((((&))))))))))).)))))).	1526	1545	1	-22.5	1	0.000179717	0.5	0.357004	0.445822	-8.40586	17	19	11	3UTR		1	1
hsa-miR-128-3p	NM_001099270	ZBTB34	((((((((((((((.......&)))))))))))).)).	5227	5243	1	-20.4	1	0.000633195	0.647	3.16856	1.11915	-4.90607	14	16	12	3UTR		1	1
hsa-miR-128-3p	NM_001102575	SNX18	((((((((....((((((...&)))))).)))))))).	3077	3093	1	-19.1	1	0.00759276	0.632	4.84389	2.29503	-12.408	14	16	8	3UTR		1	1
hsa-miR-128-3p	NM_001114118	NCBP3	.(((.((((((((((((((..&)))))))))..))))).))).	11021	11042	1	-24.5	1	6.04e-05	0.574	4.33572	3.12696	-7.91236	17	21	9	3UTR		1	1
hsa-miR-128-3p	NM_001114118	NCBP3	.....(((((((.((((((((&)))))))).))))))).	10734	10751	1	-20.7	1	0.00184296	0.662	1.15869	1.24832	-14.9547	15	17	8	3UTR		1	1
hsa-miR-128-3p	NM_001114118	NCBP3	(((((((.....(((((((((&)))))))))))))))).	12219	12236	1	-20.4	1	0.00187086	0.397	4.28166	3.49964	-14.7217	16	17	16	3UTR		1	1
hsa-miR-128-3p	NM_001127257	SLC39A10	..((((((.(((((((((((.&)))))))))))......)))))).	2699	2723	1	-19.2	1	0.00376141	0.559	0.721331	1.03274	-6.01339	17	24	11	3UTR		1	1
hsa-miR-128-3p	NM_001134367	SLC6A6	((((((((..((((((((...&))))))..))....)))))))).	4919	4942	1	-21.8	1	0.000169485	0.529	0.0098078	-0.396242	-6.23647	16	23	8	3UTR		1	1
hsa-miR-128-3p	NM_001136265	IFFO2	((((((((..((.((((((((&.))))))))..)))))))))).	2528	2571	1	-23	1	0.000165139	0.471	-0.827496	0.328226	-7.5256	18	22	10	3UTR		1	1
hsa-miR-128-3p	NM_001145001	NEK6	.(((((...(((((((((((.&))))))))).))...))))).	1640	1661	1	-20.6	1	0.0617305	0.529	0.769274	1.63412	-8.70704	16	21	9	3UTR		1	1
hsa-miR-128-3p	NM_001145427	SNX18	((((((((....((((((...&)))))).)))))))).	3230	3246	1	-19.1	1	0.00759276	0.632	4.84389	2.29503	-12.408	14	16	8	3UTR		1	1
hsa-miR-128-3p	NM_001160147	DDHD1	((((((((..(((((((....&.)))))))..)))))))).	12653	12695	1	-22.6	1	0.000646851	0.485	0.574386	0.569641	-6.23647	15	19	8	3UTR		1	1
hsa-miR-128-3p	NM_001160148	DDHD1	((((((((..(((((((....&.)))))))..)))))))).	12716	12758	1	-22.6	1	0.000646851	0.485	0.574386	0.569641	-6.23647	15	19	8	3UTR		1	1
hsa-miR-128-3p	NM_001162501	TNRC6B	.(((((((((((((.((((((&.)))))))))))))))...)))).	15427	15468	1	-22	1	0.000136586	0.426	0.72248	0.427158	-4.52877	19	24	15	3UTR		1	1
hsa-miR-128-3p	NM_001164342	ZBTB20	.((((((((((((((((....&.)))))..))))))))))).	6717	6765	1	-20.7	1	0.00175015	0.647	0.136559	0.430321	-3.79332	16	20	11	3UTR	MIRT498022	1	1
hsa-miR-128-3p	NM_001164343	ZBTB20	.((((((((((((((((....&.)))))..))))))))))).	7179	7227	1	-20.7	1	0.00175015	0.647	1.05518	1.00377	-3.79332	16	20	11	3UTR	MIRT498022	1	1
hsa-miR-128-3p	NM_001164346	ZBTB20	.((((((((((((((((....&.)))))..))))))))))).	6736	6784	1	-20.7	1	0.00175015	0.647	-0.0706188	0.307187	-3.79332	16	20	11	3UTR	MIRT498022	1	1
hsa-miR-128-3p	NM_001164347	ZBTB20	.((((((((((((((((....&.)))))..))))))))))).	6758	6806	1	-20.7	1	0.00175015	0.647	0.355463	0.226271	-3.79332	16	20	11	3UTR	MIRT498022	1	1
hsa-miR-128-3p	NM_001166167	NEK6	.(((((...(((((((((((.&))))))))).))...))))).	1454	1475	1	-20.6	1	0.0617305	0.529	1.05585	1.11675	-8.70704	16	21	9	3UTR		1	1
hsa-miR-128-3p	NM_001166168	NEK6	.(((((...(((((((((((.&))))))))).))...))))).	1459	1480	1	-20.6	1	0.0617305	0.529	1.30149	1.13824	-8.70704	16	21	9	3UTR		1	1
hsa-miR-128-3p	NM_001166169	NEK6	.(((((...(((((((((((.&))))))))).))...))))).	1458	1479	1	-20.6	1	0.0617305	0.529	1.05585	1.11675	-8.70704	16	21	9	3UTR		1	1
hsa-miR-128-3p	NM_001166170	NEK6	.(((((...(((((((((((.&))))))))).))...))))).	1463	1484	1	-20.6	1	0.0617305	0.529	1.10703	1.17969	-8.70704	16	21	9	3UTR		1	1
hsa-miR-128-3p	NM_001169117	STIM2	((((((((((..(((((....&))))))))))))))).	3397	3413	1	-18.5	1	0.000840849	0.603	5.29266	2.40571	-10.1092	15	16	15	3UTR		1	1
hsa-miR-128-3p	NM_001169118	STIM2	((((((((((..(((((....&))))))))))))))).	3353	3369	1	-18.5	1	0.000840849	0.603	5.29266	2.40571	-10.1092	15	16	15	3UTR		1	1
hsa-miR-128-3p	NM_001172623	NEO1	((((((.(.((((((((((((&))))))))).....)))))))))).	5240	5265	1	-19.3	1	0.00492878	0.559	1.80193	1.73597	-6.53765	19	25	10	3UTR		1	1
hsa-miR-128-3p	NM_001172624	NEO1	((((((.(.((((((((((((&))))))))).....)))))))))).	5366	5391	1	-19.3	1	0.00492878	0.559	1.80193	1.73597	-6.53765	19	25	10	3UTR		1	1
hsa-miR-128-3p	NM_001198783	POU2F1	...((((((.(((((((....&))))))).)))))).	4218	4233	1	-19.8	1	0.000294126	0.603	1.28348	0.511019	-7.75705	13	15	7	3UTR		1	1
hsa-miR-128-3p	NM_001198786	POU2F1	...((((((.(((((((....&))))))).)))))).	3865	3880	1	-19.8	1	0.000294126	0.603	1.28348	0.511019	-7.75705	13	15	7	3UTR		1	1
hsa-miR-128-3p	NM_001199155	KAT7	(((((((((.(((((((((((&)))))))))))...........................))))))))).	4044	4092	1	-25	1	2.76e-05	0.544	0.0692227	-0.0386707	-5.18008	20	48	11	3UTR	MIRT234479	1	1
hsa-miR-128-3p	NM_001199156	KAT7	(((((((((.(((((((((((&)))))))))))...........................))))))))).	3717	3765	1	-25	1	2.76e-05	0.544	0.0692227	-0.0386707	-5.18008	20	48	11	3UTR	MIRT234479	1	1
hsa-miR-128-3p	NM_001199157	KAT7	(((((((((.(((((((((((&)))))))))))...........................))))))))).	3804	3852	1	-25	1	2.76e-05	0.544	0.0692227	-0.0386707	-5.18008	20	48	11	3UTR	MIRT234479	1	1
hsa-miR-128-3p	NM_001199158	KAT7	(((((((((.(((((((((((&)))))))))))...........................))))))))).	3627	3675	1	-25	1	2.76e-05	0.544	0.0692227	-0.0386707	-5.18008	20	48	11	3UTR	MIRT234479	1	1
hsa-miR-128-3p	NM_001201	BMP3	((.((((...(((((((((((&)))))))))))......)))))).	3544	3568	1	-20	1	0.000286612	0.574	0	0	-10.1076	17	24	11	3UTR		1	1
hsa-miR-128-3p	NM_001204171	MDM4	.(((((((((((.((((((..&)))))).))...))))))))).	4285	4307	1	-23.7	1	0.0006818	0.544	0	0	-5.08246	17	22	9	3UTR		1	1
hsa-miR-128-3p	NM_001204172	MDM4	.(((((((((((.((((((..&)))))).))...))))))))).	3457	3479	1	-23.7	1	0.0006818	0.544	0	0	-5.08246	17	22	9	3UTR		1	1
hsa-miR-128-3p	NM_001206971	PTPRB	.(((((((((((((.((((((&))))))...))))..........))))))))).	5944	5977	1	-20.1	1	0.0015957	0.647	0	0	-4.52877	19	33	9	3UTR		1	1
hsa-miR-128-3p	NM_001206972	PTPRB	.(((((((((((((.((((((&))))))...))))..........))))))))).	5944	5977	1	-20.1	1	0.0015957	0.647	0	0	-4.52877	19	33	9	3UTR		1	1
hsa-miR-128-3p	NM_001243013	ABCB9	(((((((((((.(((......&))).)).))))))))).	2979	2996	1	-18	1	0.00567595	0.426	0	0	-7.51743	14	17	9	3UTR		1	1
hsa-miR-128-3p	NM_001244682	POU2F3	(((((((((((.(((......&))).).)))))))))).	1639	1656	1	-16.8	1	3.71e-05	0.603	0	0	-7.51743	14	17	10	3UTR		1	1
hsa-miR-128-3p	NM_001244766	MOB1B	.(((((.((((((((((....&))))))))))))))).	1243	1259	1	-17.9	1	0.00035345	0.588	0	0	-5.33701	15	16	15	3UTR	MIRT022073	1	1
hsa-miR-128-3p	NM_001252226	PLK2	(((((((..(((((((.....&))))).)).))))))).	2543	2560	1	-17.1	1	0.0122086	0.632	0	0	-7.3076	14	17	7	3UTR		1	1
hsa-miR-143-3p	NM_033360	KRAS	((.((((((((((((((((((&.)))))))))))))))))))).	4996	5026	0.961538	-25.6	1	0.00975931	0.574	6.29823	6.29865	-5.49511	20	22	20	3UTR	MIRT000312	1	1
hsa-miR-143-3p	NM_004985	KRAS	((.((((((((((((((((((&.)))))))))))))))))))).	4872	4902	0.961538	-25.6	1	0.00975931	0.574	6.29823	6.29865	-5.49511	20	22	20	3UTR	MIRT000312	1	1
hsa-miR-143-3p	NM_005156	PTBP3	(((.(((..(((((((((((.&)))))))))))..)))..))).	3655	3677	0.961538	-21.2	1	0.000805115	0.471	2.36208	1.44503	-10.3396	17	22	11	3UTR		1	1
hsa-miR-143-3p	NM_001258294	NFATC2	((((((((((((((.(.(((.&))).).))))))))..................)))))).	3403	3442	0.974359	-18.5	1	0.000725184	0.559	-0.109006	-0.131098	-4.67302	18	39	8	3UTR		1	1
hsa-miR-143-3p	NM_001690	ATP6V1A	(((..((((((.(((((((..&))))))).))))))..))).	4246	4266	0.980769	-19.3	1	0.00131034	0.603	1.49594	1.17742	-14.4354	16	20	7	3UTR		1	1
hsa-miR-143-3p	NM_001252634	THRB	..((((((((((((((..(((&)))..)))))..))))))))).	7409	7431	1	-22	1	0.000931464	0.515	0.755881	0.50761	-4.957	17	22	9	3UTR		1	1
hsa-miR-143-3p	NM_001252634	THRB	.(((((((((((((((.....&))))))...))))))))).	3285	3304	1	-20.3	1	0.0300997	0.574	-0.101707	0.0731129	-3.79332	15	19	9	3UTR		1	1
hsa-miR-143-3p	NM_001256761	HTR2C	(.(((((((((((.(((((((&))))))).)....)))))))))).).	1831	1857	1	-18.8	1	0.000635539	0.515	0	0	-5.95809	19	26	10	3UTR		1	1
hsa-miR-143-3p	NM_001258292	NFATC2	((((((((((((((.(.(((.&))).).))))))))..................)))))).	3829	3868	1	-18.5	1	0.000725184	0.559	0.0850512	-0.10658	-4.67302	18	39	8	3UTR		1	1
hsa-miR-143-3p	NM_001258296	NFATC2	((((((((((((((.(.(((.&))).).))))))))..................)))))).	3473	3512	1	-18.5	1	0.000725184	0.559	0.144761	-0.0881072	-4.67302	18	39	8	3UTR		1	1
hsa-miR-143-3p	NM_001258401	SLC4A8	.(((((((((((.((..(((.&)))..))....))))))))))).	8277	8300	1	-20.3	1	0.083466	0.559	0.230227	0.0324823	-5.3155	16	23	11	3UTR		1	1
hsa-miR-143-3p	NM_001270941	JAKMIP2	((((((((((.((((((((..&)))))))).)))))))))).	6794	6814	1	-21.2	1	0.00851921	0.735	4.84612	5.10465	-6.76235	18	20	10	3UTR	MIRT783804	1	1
hsa-miR-143-3p	NM_001282	AP2B1	((((((((((((((((.((..&.))..)))))))).)))))))).	4969	5001	1	-21.4	1	0.0390453	0.603	0.438349	0.530068	-3.93757	18	23	8	3UTR		1	1
hsa-miR-143-3p	NM_001286050	FAM168A	(.(((((((.((((((((...&)))))))).))))))).).	1290	1309	1	-21.9	1	0.00843653	0.574	0.603232	0.40773	-6.34376	16	19	8	3UTR		1	1
hsa-miR-143-3p	NM_001286051	FAM168A	(.(((((((.((((((((...&)))))))).))))))).).	945	964	1	-21.9	1	0.00843653	0.574	-0.311004	0.152497	-6.34376	16	19	8	3UTR		1	1
hsa-miR-143-3p	NM_001292049	STAC	((((((((.(((.((((((..&.)))))).))).......)))))))).	1185	1229	1	-19.7	1	0.09299	0.397	0.950105	1.94585	-6.28309	17	27	8	3UTR		1	1
hsa-miR-143-3p	NM_001300735	RASGEF1B	((((((((.((((.(((....&))).)))).)))))))).	2853	2871	1	-20.7	1	0.000236685	0.588	0.050531	0.36093	-5.8508	15	18	8	3UTR		1	1
hsa-miR-143-3p	NM_001300736	RASGEF1B	((((((((.((((.(((....&))).)))).)))))))).	2730	2748	1	-20.7	1	0.000236685	0.588	0.050531	0.36093	-5.8508	15	18	8	3UTR		1	1
hsa-miR-143-3p	NM_001301085	QKI	.((((((((((((((((.((.&.)))))).)))))))))).)).	7420	7461	1	-21.1	1	0.00304365	0.544	1.86157	0.737103	-3.79332	18	22	10	3UTR		1	1
hsa-miR-143-3p	NM_033360	KRAS	((((((((((((((((((((.&)))))))))..)).....))))))))).	4512	4540	1	-21.8	1	0.0188901	0.676	3.2684	6.40244	-3.93757	20	28	9	3UTR	MIRT000312	1	1
hsa-miR-143-3p	NM_078473	TM2D2	((((..((((((((((((...&.))))))))..)))).)))).	3133	3169	1	-18.3	1	0.00593477	0.618	3.40734	1.69948	-9.95757	16	21	8	3UTR		1	1
hsa-miR-143-3p	NM_138799	MBOAT2	(((((.((((((((((((...&.))))))))))))))).)).	6136	6163	1	-18.1	1	0.00401155	0.662	1.08836	1.61826	-5.83853	17	20	15	3UTR		1	1
hsa-miR-143-3p	NM_139032	MAPK7	(((((((.(((.((((((...&)))))))))))))))).	2516	2533	1	-19.8	1	0.000209336	0.471	2.7287	0.825161	-9.59801	16	17	16	3UTR	MIRT003759	1	1
hsa-miR-143-3p	NM_139033	MAPK7	(((((((.(((.((((((...&)))))))))))))))).	2919	2936	1	-19.8	1	0.000209336	0.471	1.26608	0.666118	-9.59801	16	17	16	3UTR	MIRT003759	1	1
hsa-miR-143-3p	NM_139034	MAPK7	(((((((.(((.((((((...&)))))))))))))))).	2612	2629	1	-19.8	1	0.000209336	0.471	2.7287	0.825161	-9.59801	16	17	16	3UTR	MIRT003759	1	1
hsa-miR-143-3p	NM_144660	SAMD8	.(((((((((((((((.((((&)))).)))))))))).......))))).	5551	5579	1	-22.7	1	0.0355031	0.529	-0.303103	-0.0352372	-3.79332	19	28	10	3UTR	MIRT178097	1	1
hsa-miR-143-3p	NM_152478	ZNF583	..((((((((((((((((((.&)))))).....)))))))))))).	3840	3864	1	-21	1	0.0128933	0.662	0.154533	-0.121349	-4.957	18	24	12	3UTR		1	1
hsa-miR-143-3p	NM_152545	RASGEF1B	((((((((.((((.(((....&))).)))).)))))))).	2856	2874	1	-20.7	1	0.000236685	0.588	0.050531	0.36093	-5.8508	15	18	8	3UTR		1	1
hsa-miR-143-3p	NM_173557	RNF152	.((((.((((((((((((...&)))))))).)))).).))).	3838	3858	1	-18.5	1	0.0139771	0.515	0.631086	0.951142	-5.69428	16	20	8	3UTR		1	1
hsa-miR-143-3p	NM_173694	ATP11C	(((((.(((((((((((....&.))))))))))).))))).	4421	4454	1	-21.4	1	0.00259249	0.603	1.88194	2.85241	-5.83853	16	19	11	3UTR		1	1
hsa-miR-143-3p	NM_206853	QKI	.((((((((((((((((.((.&.)))))).)))))))))).)).	12117	12158	1	-21.1	1	0.00304365	0.544	1.86157	0.737103	-3.79332	18	22	10	3UTR		1	1
hsa-miR-143-3p	NM_206854	QKI	.((((((((((((((((.((.&.)))))).)))))))))).)).	13396	13437	1	-21.1	1	0.00304365	0.544	1.86157	0.737103	-3.79332	18	22	10	3UTR		1	1
hsa-miR-143-3p	NM_206855	QKI	.((((((((((((((((.((.&.)))))).)))))))))).)).	14343	14384	1	-21.1	1	0.00304365	0.544	1.86157	0.737103	-3.79332	18	22	10	3UTR		1	1
hsa-miR-143-3p	XM_005246469	GPD2	(((((((((((((((((((((&))))))))))....))))))))))).	2964	2990	1	-28.2	1	3.27e-05	0.603	0	0	-3.93757	21	26	11	3UTR		1	1
hsa-miR-143-3p	XM_006723784	KCNB1	((((....(((((((((((..&)))))))))))..)))).	4491	4509	1	-20.3	1	0.00156873	0.603	0	0	-13.8149	15	18	11	3UTR		1	1
hsa-miR-143-3p	XM_006724626	DLG3	.((((((((...((..(((((&)))))..))....)))))))).	5707	5729	1	-18.9	1	0.158183	0.574	0	0	-12.1759	15	22	8	3UTR		1	1
hsa-miR-143-3p	XM_006724626	DLG3	.(((((((((((((((((...&)))))).))))))))...))).	4187	4209	1	-18.7	1	0.0122994	0.529	0	0	-3.79332	17	22	8	3UTR		1	1
hsa-miR-143-3p	XM_011510978	GPD2	(((((((((((((((((((((&))))))))))....))))))))))).	3069	3095	1	-28.2	1	3.27e-05	0.603	0	0	-3.93757	21	26	11	3UTR		1	1
hsa-miR-143-3p	NM_014701	SECISBP2L	(((((((((((((((((((((&))))))))).............)))))))))))).	3355	3390	1	-28	1	0.115214	0.618	1.16889	1.04922	-3.93757	21	35	12	3UTR	MIRT468661	1	1
hsa-miR-143-3p	NM_014790	JAKMIP2	((((((((((.((((((((..&)))))))).)))))))))).	6723	6743	1	-21.2	1	0.00851921	0.735	4.84612	5.10465	-6.76235	18	20	10	3UTR	MIRT783804	1	1
hsa-miR-143-3p	NM_014906	PPM1E	.((((((((((.((((..(((&)))..))))))))))).))).	6311	6332	1	-19.6	1	0.0320666	0.588	1.44156	1.70932	-7.14013	17	21	11	3UTR		1	1
hsa-miR-143-3p	NM_014909	VASH1	((((((((((((((((((((.&)))))))))))).........................)))))))).	6293	6339	1	-26.2	1	0.00252	0.574	0.27063	0.267106	-3.93757	20	46	12	3UTR		1	1
hsa-miR-143-3p	NM_014911	AAK1	((((((((((((((((.(((.&))).))))))))).))))))).	6186	6208	1	-19.5	1	0.0329579	0.662	0.0900893	0.261049	-3.93757	19	22	9	3UTR		1	1
hsa-miR-143-3p	NM_015159	FAM168A	(.(((((((.((((((((...&)))))))).))))))).).	1263	1282	1	-21.9	1	0.00843653	0.574	0.201409	0.356729	-6.34376	16	19	8	3UTR		1	1
hsa-miR-143-3p	NM_015575	GIGYF2	.(((((((.((((...(((((&)))))...)))).))))))).	7136	7157	1	-22.2	1	0.000678407	0.485	-0.409191	-0.127316	-6.67505	16	21	7	3UTR		1	1
hsa-miR-143-3p	NM_017707	ASAP3	(((((((((((((((..((((&.))))...)))))).........))))))))).	3962	4006	1	-22.2	1	0.00365053	0.603	1.21393	0.645666	-4.17062	19	33	9	3UTR		1	1
hsa-miR-143-3p	NM_017990	PDPR	..(((.((.((.(((((((((&))))))))))).)).))).	4842	4861	1	-21.7	1	3.39e-05	0.441	0.0981934	-0.281972	-11.2612	16	19	11	3UTR		1	1
hsa-miR-143-3p	NM_017990	PDPR	(.((.((((((((((..((((&))))...)))))))))))).).	6834	6856	1	-21.1	1	6.85e-06	0.5	-0.330104	-0.182852	-9.45334	17	22	12	3UTR		1	1
hsa-miR-143-3p	NM_018440	PAG1	(((((((((.((((((((((.&))))).))))).).)))))))).	2283	2306	1	-24.5	1	0.00725286	0.544	0.326616	-0.3727	-5.18008	19	23	8	3UTR		1	1
hsa-miR-143-3p	NM_018440	PAG1	(.((((((((((((.(.((((&)))).).)))))))))))).).	8748	8770	1	-22	1	0.00527258	0.632	2.04681	1.57835	-5.8367	18	22	12	3UTR		1	1
hsa-miR-143-3p	NM_020122	KCMF1	.(((((.(((((((((((...&.)))))))))))))))).	3919	3966	1	-21.3	1	0.00230913	0.735	0.235392	0.31718	-5.33701	16	18	16	3UTR		1	1
hsa-miR-143-3p	NM_020730	DLG3	.(((((((((((((((((...&)))))).))))))))...))).	3208	3230	1	-18.7	1	0.0122994	0.529	1.40967	0.830174	-3.79332	17	22	8	3UTR		1	1
hsa-miR-143-3p	NM_021120	DLG3	.(((((((((((((((((...&)))))).))))))))...))).	4160	4182	1	-18.7	1	0.0122994	0.529	1.40967	0.830174	-3.79332	17	22	8	3UTR		1	1
hsa-miR-143-3p	NM_002749	MAPK7	(((((((.(((.((((((...&)))))))))))))))).	2700	2717	1	-19.8	1	0.000209336	0.471	2.7287	0.825161	-9.59801	16	17	16	3UTR	MIRT003759	1	1
hsa-miR-143-3p	NM_003149	STAC	((((((((.(((.((((((..&.)))))).))).......)))))))).	1368	1412	1	-19.7	1	0.09299	0.397	0.950105	1.94585	-6.28309	17	27	8	3UTR		1	1
hsa-miR-143-3p	NM_004976	KCNC1	(((((((.((((((((.....&.)))).))))))))))).	5475	5523	1	-20	1	0.00368465	0.574	2.40993	0.898377	-6.25121	15	18	11	3UTR		1	1
hsa-miR-143-3p	NM_005389	PCMT1	((((((((..((((((((...&.))))))))......)))))))).	942	992	1	-19.1	1	0.00139688	0.618	2.56177	3.26139	-6.23647	16	24	8	3UTR		1	1
hsa-miR-143-3p	NM_005400	PRKCE	((((((((.(((((((((...&.)))))))).).)))))))).	4786	4828	1	-21.1	1	0.00387789	0.618	3.33838	2.58619	-4.99396	17	21	8	3UTR		1	1
hsa-miR-143-3p	NM_005400	PRKCE	.((((((((((((((((((..&)))).))))))......)))))))).	3923	3949	1	-19.5	1	0.0867139	0.618	2.36089	1.82761	-3.79332	18	26	8	3UTR		1	1
hsa-miR-143-3p	NM_006775	QKI	.((((((((((((((((.((.&.)))))).)))))))))).)).	7444	7485	1	-21.1	1	0.00304365	0.544	1.86157	0.737103	-3.79332	18	22	10	3UTR		1	1
hsa-miR-143-3p	NM_007249	KLF12	.....((((((((((((((..&)))))))))))).)).	4969	4985	1	-19.6	1	0.0540135	0.574	2.07861	2.20293	-13.6656	14	16	12	3UTR		1	1
hsa-miR-143-3p	NM_007249	KLF12	.(((((((((((((((((...&))))))))))..............))))))).	2245	2277	1	-19	1	0.0177953	0.574	0.744888	0.501546	-3.79332	17	32	10	3UTR		1	1
hsa-miR-143-3p	NM_007314	ABL2	.(((((((((((..((((((.&)))))))))))))).))).	5347	5366	1	-19.3	1	0.0280138	0.632	0.711325	0.673693	-5.9393	17	19	14	3UTR		1	1
hsa-miR-143-3p	NM_007375	TARDBP	((((((((...(((((((...&))))))))))))))).	1879	1895	1	-18.8	1	0.104312	0.676	4.92051	3.78513	-9.06125	15	16	15	3UTR		1	1
hsa-miR-143-3p	NM_012340	NFATC2	((((((((((((((.(.(((.&))).).))))))))..................)))))).	3987	4026	1	-18.5	1	0.000725184	0.559	0.346842	-0.0172182	-4.67302	18	39	8	3UTR		1	1
hsa-miR-143-3p	NM_014252	SLC25A15	((((((((...(((((((((.&.)).))))))))))))))).	1064	1085	1	-20.5	1	0.00951082	0.529	0.643242	0.924134	-9.06125	17	20	15	3UTR		1	1
hsa-miR-143-3p	NM_014331	SLC7A11	((((((((((..((...((((&.))))...)).)))))))))).	6507	6577	1	-21	1	0.00536973	0.662	0.694003	-0.190649	-11.0777	16	22	10	3UTR		1	1
hsa-miR-143-3p	NM_014548	TMOD2	(.(((((((((...(((.(((&))).)))...))))))))).).	4839	4861	1	-19.8	1	0.0104543	0.559	0.599192	0.306808	-10.594	16	22	9	3UTR		1	1
hsa-miR-143-3p	NM_001322117	PDPR	..(((.((.((.(((((((((&))))))))))).)).))).	5499	5518	1	-21.7	1	3.39e-05	0.441	0.0981934	-0.281972	-11.2612	16	19	11	3UTR		1	1
hsa-miR-143-3p	NM_001322117	PDPR	(.((.((((((((((..((((&))))...)))))))))))).).	7491	7513	1	-21.1	1	6.85e-06	0.5	-0.330104	-0.182852	-9.45334	17	22	12	3UTR		1	1
hsa-miR-143-3p	NM_001322118	PDPR	..(((.((.((.(((((((((&))))))))))).)).))).	5179	5198	1	-21.7	1	3.39e-05	0.441	0.0981934	-0.281972	-11.2612	16	19	11	3UTR		1	1
hsa-miR-143-3p	NM_001322118	PDPR	(.((.((((((((((..((((&))))...)))))))))))).).	7171	7193	1	-21.1	1	6.85e-06	0.5	-0.330104	-0.182852	-9.45334	17	22	12	3UTR		1	1
hsa-miR-143-3p	NM_001322950	FRMD5	(((((((.((((((((.....&.))))))))))))))).	2679	2716	1	-16.8	1	0.00847445	0.603	0.996419	0.630213	-6.25121	15	17	15	3UTR		1	1
hsa-miR-143-3p	NM_001354712	THRB	..((((((((((((((..(((&)))..)))))..))))))))).	7320	7342	1	-22	1	0.000931464	0.515	0.755881	0.375543	-4.957	17	22	9	3UTR		1	1
hsa-miR-143-3p	NM_001354712	THRB	.(((((((((((((((.....&))))))...))))))))).	3196	3215	1	-20.3	1	0.0300997	0.574	0.17883	-0.0624115	-3.79332	15	19	9	3UTR		1	1
hsa-miR-143-3p	NM_001360452	PCMT1	((((((((..((((((((...&.))))))))......)))))))).	896	946	1	-19.1	1	0.00139688	0.618	2.56177	3.26139	-6.23647	16	24	8	3UTR		1	1
hsa-miR-143-3p	NM_001363652	NPR3	((((.(((((((.((((((..&)))))).))))))).)))).	5564	5584	1	-19.1	1	0.00410645	0.691	0.873358	0.823986	-9.34574	17	20	7	3UTR		1	1
hsa-miR-143-3p	NM_001371575	AAK1	((((((((((((((((.(((.&))).))))))))).))))))).	6068	6090	1	-19.5	1	0.0329579	0.662	0.101816	0.444614	-3.93757	19	22	9	3UTR		1	1
hsa-miR-143-3p	NM_001374822	THRB	..((((((((((((((..(((&)))..)))))..))))))))).	7110	7132	1	-22	1	0.000931464	0.515	2.46695	2.16835	-4.957	17	22	9	3UTR		1	1
hsa-miR-143-3p	NM_001374822	THRB	.(((((((((((((((.....&))))))...))))))))).	2986	3005	1	-20.3	1	0.0300997	0.574	0.0798166	0.334879	-3.79332	15	19	9	3UTR		1	1
hsa-miR-143-3p	NM_001374823	THRB	..((((((((((((((..(((&)))..)))))..))))))))).	7242	7264	1	-22	1	0.000931464	0.515	0.733645	0.311439	-4.957	17	22	9	3UTR		1	1
hsa-miR-143-3p	NM_001374823	THRB	.(((((((((((((((.....&))))))...))))))))).	3118	3137	1	-20.3	1	0.0300997	0.574	-0.481258	-0.144097	-3.79332	15	19	9	3UTR		1	1
hsa-miR-143-3p	NM_001374824	THRB	..((((((((((((((..(((&)))..)))))..))))))))).	7415	7437	1	-22	1	0.000931464	0.515	0.733645	0.128488	-4.957	17	22	9	3UTR		1	1
hsa-miR-143-3p	NM_001374824	THRB	.(((((((((((((((.....&))))))...))))))))).	3291	3310	1	-20.3	1	0.0300997	0.574	-0.085205	0.0341264	-3.79332	15	19	9	3UTR		1	1
hsa-miR-143-3p	NM_001374825	THRB	..((((((((((((((..(((&)))..)))))..))))))))).	7122	7144	1	-22	1	0.000931464	0.515	1.58744	1.6654	-4.957	17	22	9	3UTR		1	1
hsa-miR-143-3p	NM_001374825	THRB	.(((((((((((((((.....&))))))...))))))))).	2998	3017	1	-20.3	1	0.0300997	0.574	0.500622	0.400785	-3.79332	15	19	9	3UTR		1	1
hsa-miR-143-3p	NM_000408	GPD2	(((((((((((((((((((((&))))))))))....))))))))))).	3034	3060	1	-28.2	1	3.27e-05	0.603	1.37642	1.16532	-3.93757	21	26	11	3UTR		1	1
hsa-miR-143-3p	NM_000461	THRB	..((((((((((((((..(((&)))..)))))..))))))))).	7174	7196	1	-22	1	0.000931464	0.515	0.755881	0.953398	-4.957	17	22	9	3UTR		1	1
hsa-miR-143-3p	NM_000461	THRB	.(((((((((((((((.....&))))))...))))))))).	3050	3069	1	-20.3	1	0.0300997	0.574	0.121073	-0.0661243	-3.79332	15	19	9	3UTR		1	1
hsa-miR-143-3p	NM_000908	NPR3	((((.(((((((.((((((..&)))))).))))))).)))).	6651	6671	1	-19.1	1	0.00410645	0.691	0.873358	0.823986	-9.34574	17	20	7	3UTR		1	1
hsa-miR-143-3p	NM_001010986	ATP11C	(((((.(((((((((((....&.))))))))))).))))).	4316	4349	1	-21.4	1	0.00259249	0.603	1.88194	2.85241	-5.83853	16	19	11	3UTR		1	1
hsa-miR-143-3p	NM_001030006	AP2B1	((((((((((((((((.((..&.))..)))))))).)))))))).	5011	5043	1	-21.4	1	0.0390453	0.603	0.438349	0.530068	-3.93757	18	23	8	3UTR		1	1
hsa-miR-143-3p	NM_001039960	SLC4A8	.(((((((((((.((..(((.&)))..))....))))))))))).	8439	8462	1	-20.3	1	0.083466	0.559	-0.0981401	-0.061802	-5.3155	16	23	11	3UTR		1	1
hsa-miR-143-3p	NM_001083112	GPD2	(((((((((((((((((((((&))))))))))....))))))))))).	3152	3178	1	-28.2	1	3.27e-05	0.603	1.37642	1.16532	-3.93757	21	26	11	3UTR		1	1
hsa-miR-143-3p	NM_001102653	OTUD4	((((((.((((((........&)))))).)))))).	5282	5296	1	-16.5	1	0.000262889	0.632	2.28227	3.16557	-7.3066	12	14	6	3UTR		1	1
hsa-miR-143-3p	NM_001103146	GIGYF2	.(((((((.((((...(((((&)))))...)))).))))))).	6996	7017	1	-22.2	1	0.000678407	0.485	-0.409191	-0.127316	-6.67505	16	21	7	3UTR		1	1
hsa-miR-143-3p	NM_001103147	GIGYF2	.(((((((.((((...(((((&)))))...)))).))))))).	7129	7150	1	-22.2	1	0.000678407	0.485	-0.409191	-0.127316	-6.67505	16	21	7	3UTR		1	1
hsa-miR-143-3p	NM_001103148	GIGYF2	.(((((((.((((...(((((&)))))...)))).))))))).	6912	6933	1	-22.2	1	0.000678407	0.485	-0.409191	-0.127316	-6.67505	16	21	7	3UTR		1	1
hsa-miR-143-3p	NM_001127208	TET2	((((.((.((((.(((((((.&))))))))))).))..)))).	7570	7591	1	-19.5	1	0.036519	0.588	0.42828	1.03323	-11.6594	17	21	11	3UTR		1	1
hsa-miR-143-3p	NM_001127208	TET2	(((((((.((((((.......&))))))))))))).	7456	7470	1	-18.8	1	0.0183342	0.647	3.43192	1.55668	-7.21971	13	14	13	3UTR		1	1
hsa-miR-143-3p	NM_001128176	THRB	..((((((((((((((..(((&)))..)))))..))))))))).	7285	7307	1	-22	1	0.000931464	0.515	0.117647	0.460574	-4.957	17	22	9	3UTR		1	1
hsa-miR-143-3p	NM_001128176	THRB	.(((((((((((((((.....&))))))...))))))))).	3161	3180	1	-20.3	1	0.0300997	0.574	-0.204846	-0.11625	-3.79332	15	19	9	3UTR		1	1
hsa-miR-143-3p	NM_001129827	CACNA1C	.(((((((....(((.(((((&))))).)))..))))))).	13747	13766	1	-20.5	1	0.000233697	0.544	4.0042	3.56881	-12.4968	15	19	7	3UTR		1	1
hsa-miR-143-3p	NM_001129830	CACNA1C	.(((((((....(((.(((((&))))).)))..))))))).	13708	13727	1	-20.5	1	0.000233697	0.544	4.0042	3.56881	-12.4968	15	19	7	3UTR		1	1
hsa-miR-143-3p	NM_001142885	TMOD2	(.(((((((((...(((.(((&))).)))...))))))))).).	4731	4753	1	-19.8	1	0.0104543	0.559	0.599192	0.306808	-10.594	16	22	9	3UTR		1	1
hsa-miR-143-3p	NM_001143778	ASAP3	(((((((((((((((..((((&.))))...)))))).........))))))))).	3935	3979	1	-22.2	1	0.00365053	0.603	1.21393	0.645666	-4.17062	19	33	9	3UTR		1	1
hsa-miR-143-3p	NM_001159860	ZNF583	..((((((((((((((((((.&)))))).....)))))))))))).	3795	3819	1	-21	1	0.0128933	0.662	0	0	-4.957	18	24	12	3UTR		1	1
hsa-miR-143-3p	NM_001163788	PTBP3	(((.(((..(((((((((((.&)))))))))))..)))..))).	3630	3652	1	-21.2	1	0.000805115	0.471	-0.0130872	0.111062	-10.3396	17	22	11	3UTR		1	1
hsa-miR-143-3p	NM_001163790	PTBP3	(((.(((..(((((((((((.&)))))))))))..)))..))).	3709	3731	1	-21.2	1	0.000805115	0.471	0.749092	1.26955	-10.3396	17	22	11	3UTR		1	1
hsa-miR-143-3p	NM_001166278	DLG3	.((((((((...((..(((((&)))))..))....)))))))).	4091	4113	1	-18.9	1	0.158183	0.574	-0.0582794	-0.113168	-12.1759	15	22	8	3UTR		1	1
hsa-miR-143-3p	NM_001166278	DLG3	.(((((((((((((((((...&)))))).))))))))...))).	2571	2593	1	-18.7	1	0.0122994	0.529	0.118864	0.24266	-3.79332	17	22	8	3UTR		1	1
hsa-miR-143-3p	NM_001168236	ABL2	.(((((((((((..((((((.&)))))))))))))).))).	5284	5303	1	-19.3	1	0.0280138	0.632	0.689667	0.784153	-5.9393	17	19	14	3UTR		1	1
hsa-miR-143-3p	NM_001168238	ABL2	.(((((((((((..((((((.&)))))))))))))).))).	4975	4994	1	-19.3	1	0.0280138	0.632	0.104879	0.264342	-5.9393	17	19	14	3UTR		1	1
hsa-miR-143-3p	NM_001174156	SAMD8	.(((((((((((((((.((((&)))).)))))))))).......))))).	5324	5352	1	-22.7	1	0.0355031	0.529	-0.303103	-0.0352372	-3.79332	19	28	10	3UTR	MIRT178097	1	1
hsa-miR-143-3p	NM_001193489	SECISBP2L	(((((((((((((((((((((&))))))))).............)))))))))))).	3490	3525	1	-28	1	0.115214	0.618	2.31364	2.11549	-3.93757	21	35	12	3UTR	MIRT468661	1	1
hsa-miR-143-3p	NM_001198820	A1CF	.....((.((((((((.((((&)))).)))))))).)).	3328	3345	1	-18.4	0	0.000760289	0.5	0.0971259	0.190138	-15.9792	14	17	8	3UTR		1	1
hsa-miR-143-3p	NM_001244896	PTBP3	(((.(((..(((((((((((.&)))))))))))..)))..))).	3460	3482	1	-21.2	1	0.000805115	0.471	0	0	-10.3396	17	22	11	3UTR		1	1
hsa-miR-143-3p	NM_001244898	PTBP3	(((.(((..(((((((((((.&)))))))))))..)))..))).	3714	3736	1	-21.2	1	0.000805115	0.471	0.83181	1.14119	-10.3396	17	22	11	3UTR		1	1
hsa-miR-143-3p	NM_001252050	PCMT1	((((((((..((((((((...&.))))))))......)))))))).	837	887	1	-19.1	1	0.00139688	0.618	2.56177	3.26139	-6.23647	16	24	8	3UTR		1	1
hsa-miR-143-3p	NM_001252051	PCMT1	((((((((..((((((((...&.))))))))......)))))))).	837	887	1	-19.1	1	0.00139688	0.618	2.56177	3.26139	-6.23647	16	24	8	3UTR		1	1
hsa-miR-16-5p	NM_001258379	SLC4A7	((((((((....((((((((..&)))))))))))))))).	5553	5570	0.953846	-19	1	0.00401306	0.632	4.34709	4.94034	-12.408	16	17	16	3UTR		1	1
hsa-miR-16-5p	NM_001321106	SLC4A7	((((((((....((((((((..&)))))))))))))))).	5778	5795	0.953846	-19	1	0.00401306	0.632	4.0335	6.47433	-12.408	16	17	16	3UTR		1	1
hsa-miR-16-5p	NM_001321107	SLC4A7	((((((((....((((((((..&)))))))))))))))).	5445	5462	0.953846	-19	1	0.00401306	0.632	4.34709	4.94034	-12.408	16	17	16	3UTR		1	1
hsa-miR-16-5p	NM_001278579	ACVR2A	((((((((((((((((((.(((&.))).)))))))).)))))))))).	2279	2321	0.961538	-25.2	1	0.000282353	0.588	6.76708	4.49573	-3.93757	21	25	10	3UTR	MIRT000536	1	1
hsa-miR-16-5p	NM_001278580	ACVR2A	((((((((((((((((((.(((&.))).)))))))).)))))))))).	2082	2124	0.961538	-25.2	1	0.000282353	0.588	6.76708	4.49573	-3.93757	21	25	10	3UTR	MIRT000536	1	1
hsa-miR-16-5p	NM_152493	ZNF362	(((((((((.......(((((.&))))).......))))))))).	1866	1888	0.961538	-24.4	1	0.00162427	0.618	3.9149	1.73168	-14.4661	14	22	9	3UTR		1	1
hsa-miR-16-5p	NM_016021	UBE2J1	..((((((.(.....((((((.&))))))).)))))).	3090	3105	0.961538	-17.3	1	0.0366966	0.588	3.82525	3.84528	-15.0664	13	15	7	3UTR		1	1
hsa-miR-16-5p	NM_003620	PPM1D	(((((((((.....((((((..&)))))).......))))))))).	2851	2874	0.961538	-18.2	1	0.00803038	0.721	4.39436	1.96936	-13.4976	15	23	9	3UTR	MIRT005360	1	1
hsa-miR-16-5p	NM_004898	CLOCK	(((((((((((.....((.((.&.)).)).....))))))))))).	3718	3763	0.961538	-20.5	1	0.000373652	0.647	0.911213	1.0725	-10.3988	15	23	11	3UTR		1	1
hsa-miR-16-5p	NM_001370212	ZNF362	(((((((((.......(((((.&))))).......))))))))).	2497	2519	0.961538	-24.4	1	0.00162427	0.618	3.9149	1.73168	-14.4661	14	22	9	3UTR		1	1
hsa-miR-16-5p	NM_001616	ACVR2A	((((((((((((((((((.(((&.))).)))))))).)))))))))).	2134	2176	0.961538	-25.2	1	0.000282353	0.588	6.76708	4.49573	-3.93757	21	25	10	3UTR	MIRT000536	1	1
hsa-miR-16-5p	NM_000870	HTR4	..(((((((((......(((((&))))).....)).))))))).	2767	2788	0.961538	-19	1	6.56e-05	0.485	2.76326	2.81722	-11.4183	14	21	7	3UTR		1	1
hsa-miR-16-5p	NM_201267	NRP2	..((((((((((.(((((....&)))))...)))))))))).	4790	4809	0.969231	-17.2	1	0.00531251	0.632	0.801447	0.761831	-6.24613	15	19	10	3UTR		1	1
hsa-miR-16-5p	NM_018534	NRP2	..((((((((((.(((((....&)))))...)))))))))).	4805	4824	0.969231	-17.2	1	0.00531251	0.632	0.801447	0.761831	-6.24613	15	19	10	3UTR		1	1
hsa-miR-16-5p	NM_001257396	UBE2V1	(((((((((..((((...((((&))))...))))..))))))))).	1543	1566	1	-22.9	1	3.55e-05	0.471	2.87143	2.90732	-8.2379	17	23	9	3UTR	MIRT001400	1	1
hsa-miR-16-5p	NM_001258380	SLC4A7	((((((((....((((((((..&)))))))))))))))).	5267	5284	1	-19	1	0.00401306	0.632	3.04386	3.53688	-12.408	16	17	16	3UTR		1	1
hsa-miR-16-5p	NM_001258403	SLC4A8	.((((((((((...........&)))))))))).	2795	2806	1	-16.3	1	0.00384734	0.632	0.323351	0.157864	-10.2546	10	11	10	3UTR		1	1
hsa-miR-16-5p	NM_001267722	SRP72	(((((((((.....((((((((&.))))))))..))))))))).	3030	3072	1	-19.2	1	0.0159831	0.662	0.973952	0.701183	-13.4976	17	21	9	3UTR	MIRT031562	1	1
hsa-miR-16-5p	NM_001270975	IST1	.(((((((((((((........&))))))))))))).	1852	1866	1	-18.7	1	0.00466658	0.397	0.998782	1.35646	-4.76182	13	14	13	3UTR		1	1
hsa-miR-16-5p	NM_001270976	IST1	.(((((((((((((........&))))))))))))).	2005	2019	1	-18.7	1	0.00466658	0.397	0.998782	1.35646	-4.76182	13	14	13	3UTR		1	1
hsa-miR-16-5p	NM_001270977	IST1	.(((((((((((((........&))))))))))))).	1759	1773	1	-18.7	1	0.00466658	0.397	0.998782	1.35646	-4.76182	13	14	13	3UTR		1	1
hsa-miR-16-5p	NM_001270978	IST1	.(((((((((((((........&))))))))))))).	1480	1494	1	-18.7	1	0.00466658	0.397	0.998782	1.35646	-4.76182	13	14	13	3UTR		1	1
hsa-miR-16-5p	NM_001270979	IST1	.(((((((((((((........&))))))))))))).	1434	1448	1	-18.7	1	0.00466658	0.397	0.998782	1.35646	-4.76182	13	14	13	3UTR		1	1
hsa-miR-16-5p	NM_001271282	DICER1	((((((((((........((((&))))..)))))))))).	8476	8493	1	-18.2	1	0.000972548	0.662	6.30794	5.7086	-13.2236	14	17	10	3UTR	MIRT051245	1	1
hsa-miR-16-5p	NM_001278542	DIXDC1	..((((((((((((((((((((&)))))))))))))................))))))).	1077	1114	1	-23.2	1	0.00117862	0.515	0.184311	-0.00155105	-4.957	20	37	13	3UTR	MIRT051092	1	1
hsa-miR-16-5p	NM_001282224	ATP7A	..(((((((........((((.&))))......))))))).	4436	4454	1	-19.5	1	0.000222845	0.544	3.38614	2.31607	-15.4856	11	18	7	3UTR		1	1
hsa-miR-16-5p	NM_001282396	HPCAL4	.((((((((((.....((((..&)))))))))))))).	4596	4611	1	-17.5	1	0.00257049	0.412	0.936265	0.525045	-10.2546	14	15	14	3UTR		1	1
hsa-miR-16-5p	NM_001282397	HPCAL4	.((((((((((.....((((..&)))))))))))))).	4274	4289	1	-17.5	1	0.00257049	0.412	0.936265	2.18479	-10.2546	14	15	14	3UTR		1	1
hsa-miR-16-5p	NM_001282450	ESRRA	.(((((((.(((((....((((&)))))))))))))))).	2211	2228	1	-16.5	1	0.00685489	0.456	2.59808	2.59634	-5.81821	16	17	16	3UTR		1	1
hsa-miR-16-5p	NM_001282763	CDV3	(((((((((.(...........&).))))))))).	1646	1658	1	-16.3	1	0.0017416	0.544	2.21453	0.795307	-11.6414	10	12	9	3UTR	MIRT031715	1	1
hsa-miR-16-5p	NM_001282764	CDV3	(((((((((.(...........&).))))))))).	1394	1406	1	-16.3	1	0.0017416	0.544	2.21453	0.795307	-11.6414	10	12	9	3UTR	MIRT031715	1	1
hsa-miR-16-5p	NM_001282765	CDV3	(((((((((.(...........&).))))))))).	2579	2591	1	-16.3	1	0.0017416	0.544	2.21453	0.795307	-11.6414	10	12	9	3UTR	MIRT031715	1	1
hsa-miR-16-5p	NM_001282925	ABI2	((((((((..(.(((((((((.&))))))))))..)))))))).	2717	2738	1	-24.7	1	0.00019189	0.559	0.880648	0.595631	-9.58327	18	21	10	3UTR		1	1
hsa-miR-16-5p	NM_001282925	ABI2	(((((((((((((((..(((((&)))))...)))).......))))))))))).	2347	2378	1	-20.4	1	0.00332645	0.544	0.417393	0.237072	-4.17062	20	31	11	3UTR		1	1
hsa-miR-16-5p	NM_001282926	ABI2	((((((((..(.(((((((((.&))))))))))..)))))))).	2699	2720	1	-24.7	1	0.00019189	0.559	0.880648	0.595631	-9.58327	18	21	10	3UTR		1	1
hsa-miR-16-5p	NM_001282926	ABI2	(((((((((((((((..(((((&)))))...)))).......))))))))))).	2329	2360	1	-20.4	1	0.00332645	0.544	0.417393	0.237072	-4.17062	20	31	11	3UTR		1	1
hsa-miR-16-5p	NM_001283042	USP25	((((((((.((((((..(((((&)))))....)))))).)))))))).	3737	3762	1	-18.4	1	0.00137697	0.662	5.01314	3.37072	-5.22701	19	25	8	3UTR		1	1
hsa-miR-16-5p	NM_001286059	RAB30	(((((((((((...........&))))))))))).	2159	2171	1	-17.6	1	0.000227176	0.647	2.33207	1.17569	-10.3988	11	12	11	3UTR	MIRT001424	1	1
hsa-miR-16-5p	NM_001286060	RAB30	(((((((((((...........&))))))))))).	2263	2275	1	-17.6	1	0.000227176	0.647	0.607124	0.716143	-10.3988	11	12	11	3UTR	MIRT001424	1	1
hsa-miR-16-5p	NM_001286061	RAB30	(((((((((((...........&))))))))))).	2187	2199	1	-17.6	1	0.000227176	0.647	1.06808	1.48909	-10.3988	11	12	11	3UTR	MIRT001424	1	1
hsa-miR-16-5p	NM_001286762	RUBCNL	..((((((((((...((((((.&))))))...))))))).))).	2369	2390	1	-21.1	1	0.000110596	0.618	0.528871	0.925975	-7.83842	16	21	7	3UTR		1	1
hsa-miR-16-5p	NM_001286764	RUBCNL	..((((((((((...((((((.&))))))...))))))).))).	2136	2157	1	-21.1	1	0.000110596	0.618	2.71621	3.24916	-7.83842	16	21	7	3UTR		1	1
hsa-miR-16-5p	NM_001286766	RUBCNL	..((((((((((...((((((.&))))))...))))))).))).	1866	1887	1	-21.1	1	0.000110596	0.618	2.06176	3.37226	-7.83842	16	21	7	3UTR		1	1
hsa-miR-16-5p	NM_001300865	RANBP3	(((((((((((...........&))))))))))).	2060	2072	1	-17.3	1	0.0162634	0.515	4.63632	4.06593	-10.3988	11	12	11	3UTR		1	1
hsa-miR-16-5p	NM_001308101	DCUN1D1	.(((((((.((((((.((((..&)))).))))))...))))))).	6234	6256	1	-19.3	1	0.008722	0.471	0.526983	1.34135	-5.08276	17	22	7	3UTR		1	1
hsa-miR-16-5p	NM_001308173	CCNJL	..((((..(.(((((((((((.&))))))))))).)...)))).	2551	2572	1	-23	1	0.0160694	0.485	-0.0555297	0.188897	-10.0568	16	21	11	3UTR		1	1
hsa-miR-16-5p	NM_001308173	CCNJL	(((((((((((..(((((....&)))))...))))))))))).	1998	2018	1	-19.2	1	0.0088552	0.559	0.0925023	-0.36101	-8.57351	16	20	11	3UTR		1	1
hsa-miR-16-5p	NM_001317122	AGO1	(((((((((((((((((((((.&)))))))))))).......).)))))))).	12709	12739	1	-20.2	1	0.00366368	0.559	0	0	-3.93757	21	30	12	3UTR		1	1
hsa-miR-16-5p	NM_001317123	AGO1	(((((((((((((((((((((.&)))))))))))).......).)))))))).	12614	12644	1	-20.2	1	0.00366368	0.559	0	0	-3.93757	21	30	12	3UTR		1	1
hsa-miR-16-5p	NM_001318031	SALL4	((((((((((...((((((((.&)))))))).)))))))))).	2916	2936	1	-21.8	1	0.00829521	0.574	3.39021	3.00663	-11.3983	18	20	10	3UTR		1	1
hsa-miR-16-5p	NM_030634	ZNF436	.(((((((.(((...(((((..&)))))...)))))))))).	3852	3871	1	-17.9	1	0.000431575	0.471	2.1856	2.01094	-7.73113	15	19	10	3UTR		1	1
hsa-miR-16-5p	NM_030784	GPR63	((((((((((.(((((((.(((&))).)))))))..)))))))))).	1946	1970	1	-20.2	1	0.00348453	0.632	0.312912	-0.00925247	-6.76235	20	24	10	3UTR		1	1
hsa-miR-16-5p	NM_030806	C1orf21	((.((((((((..(((((((..&.))))))))))))))).)).	3416	3448	1	-21.3	1	8.76e-05	0.559	0.297971	0.264297	-10.131	17	20	15	3UTR	MIRT031863	1	1
hsa-miR-16-5p	NM_031418	ANO3	..((((((((((.(((((((..&))))))).))))))).))).	5656	5676	1	-19	1	0.0941643	0.632	2.60074	1.30765	-6.24613	17	20	7	3UTR		1	1
hsa-miR-16-5p	NM_032229	SLITRK6	(((((((((.............&))))))))).	3776	3786	1	-16.1	1	0.0113916	0.662	2.19424	1.31045	-14.4661	9	10	9	3UTR		1	1
hsa-miR-16-5p	NM_032998	DEDD	.((((((((........(((((&))))))))))))).	2276	2290	1	-17.8	1	0.00346827	0.618	0.751464	0.981576	-14.3219	13	14	13	3UTR		1	1
hsa-miR-16-5p	NM_058179	PSAT1	((((((((.(((((.....(((&)))....)))))...)))))))).	1447	1471	1	-18.4	1	0.0104041	0.632	0.636756	0.213402	-5.96246	16	24	8	3UTR	MIRT001427	1	1
hsa-miR-16-5p	NM_058241	CCNT2	.((((((((.((((((((((((&.)))..)))))))))...)))))))).	2316	2357	1	-21.2	1	0.0776188	0.647	1.85194	3.68248	-5.03583	20	27	9	3UTR	MIRT001801	1	1
hsa-miR-16-5p	NM_078483	SLC36A1	((((((((((((((((.((.((&.)).)).)))))))...))))))))).	4625	4678	1	-21.9	1	0.000849783	0.544	0.155281	0.200767	-3.93757	20	27	9	3UTR		1	1
hsa-miR-16-5p	NM_080645	COL12A1	.((((((((........(((((&))))))))))))).	6026	6040	1	-19.3	1	0.000474614	0.588	2.74898	3.52683	-14.3219	13	14	13	3UTR		1	1
hsa-miR-16-5p	NM_144568	PIP4P1	((((((((.(((((........&))))))))))))).	1336	1350	1	-16.2	1	0.00574827	0.456	6.2253	4.89077	-5.96246	13	14	13	3UTR	MIRT031583	1	1
hsa-miR-16-5p	NM_153051	MTMR3	(((((((((.(....((((((.&))))))....).))))))))).	7650	7672	1	-19.5	1	0.00294457	0.559	0.150157	0.147789	-11.4083	16	22	9	3UTR	MIRT300993	1	1
hsa-miR-16-5p	NM_153616	SEMA6D	((((((((((.((((.......&)))))))))))))).	4656	4671	1	-16.7	1	0.0181315	0.618	3.8936	1.38257	-6.9954	14	15	14	3UTR		1	1
hsa-miR-16-5p	NM_153617	SEMA6D	((((((((((.((((.......&)))))))))))))).	4713	4728	1	-16.7	1	0.0181315	0.618	3.8936	1.38257	-6.9954	14	15	14	3UTR		1	1
hsa-miR-16-5p	NM_153618	SEMA6D	((((((((((.((((.......&)))))))))))))).	4881	4896	1	-16.7	1	0.0181315	0.618	3.8936	1.38257	-6.9954	14	15	14	3UTR		1	1
hsa-miR-16-5p	NM_153619	SEMA6D	((((((((((.((((.......&)))))))))))))).	4294	4309	1	-16.7	1	0.0181315	0.618	3.8936	1.38257	-6.9954	14	15	14	3UTR		1	1
hsa-miR-16-5p	NM_153746	ZDHHC14	((((((((((((((((.(((((&.)))))..))).))))....))))))))).	2712	2749	1	-18.7	1	0.00258991	0.529	0.833731	0.633646	-3.93757	21	30	9	3UTR		1	1
hsa-miR-16-5p	NM_177438	DICER1	((((((((((........((((&))))..)))))))))).	8597	8614	1	-18.2	1	0.000972548	0.662	6.19513	5.80755	-13.2236	14	17	10	3UTR	MIRT051245	1	1
hsa-miR-16-5p	NM_177949	ARMCX2	.(((((((((............&))))))))).	2655	2665	1	-16.3	1	0.0781268	0.676	0.256216	0.763188	-13.0794	9	10	9	3UTR	MIRT051213	1	1
hsa-miR-16-5p	NM_181780	BTLA	(((((((((.(...........&).))))))))).	2155	2167	1	-16.2	1	0.0109994	0.632	1.40832	0.0421496	-11.6414	10	12	9	3UTR		1	1
hsa-miR-16-5p	NM_181873	MTMR11	.(((((((.((((.....((((&.))))))))))))))).	2174	2213	1	-18.5	1	0.0275995	0.574	1.68017	0.847405	-6.67505	15	17	15	3UTR		1	1
hsa-miR-16-5p	NM_182762	MACC1	..(((.((((((((((((((((&))))))))))))))))))).	4127	4147	1	-23.7	1	0.00102767	0.603	-0.001625	-0.19865	-6.85796	19	20	19	3UTR		1	1
hsa-miR-16-5p	NM_203464	AK4	(((((((((.............&))))))))).	1955	1965	1	-16.6	1	0.0110214	0.647	1.46534	0.42846	-14.4661	9	10	9	3UTR		1	1
hsa-miR-16-5p	XM_005268244	AREL1	(((((((((.(.....((((..&.))))....).))))))))).	4398	4447	1	-19.4	1	0.000385979	0.471	0	0	-11.6414	14	21	9	3UTR		1	1
hsa-miR-16-5p	XM_006718621	PPP6R3	((((((((((........((((&.)))))))))))))).	3825	3846	1	-18.8	1	0.000193342	0.574	0	0	-13.2236	14	16	14	3UTR	MIRT737990	1	1
hsa-miR-16-5p	XM_006724226	TXN2	(((((((((.............&))))))))).	882	892	1	-16	1	2.26e-06	0.338	0	0	-14.4661	9	10	9	3UTR	MIRT001402	1	1
hsa-miR-16-5p	XM_006724507	RPS6KA3	(((.(((((((.....(((((.&)))))..)))))))))).	5053	5071	1	-17.7	1	0.00338119	0.603	0	0	-13.4309	15	18	10	3UTR	MIRT031564	1	1
hsa-miR-16-5p	XM_011509277	ESRRG	....((((((((..(((((((.&))))))))))))))).	3144	3160	1	-19.9	1	0.00220395	0.618	0	0	-11.6925	15	16	15	3UTR		1	1
hsa-miR-16-5p	XM_011509654	POU2F1	...((((((((((.(((((((.&)))))))..)))))))))).	13532	13552	1	-22.9	1	9.33e-05	0.544	0	0	-7.37138	17	20	10	3UTR		1	1
hsa-miR-16-5p	XM_011523279	SIAH1	(((((((((.....(((((((.&)))))))....))))))))).	2910	2931	1	-22.8	1	0.000333848	0.632	0	0	-13.4976	16	21	9	3UTR		1	1
hsa-miR-16-5p	XM_011531716	TMEM154	(((((((((...(((((((((.&)))))))))..................)))))..)))).	2356	2395	1	-19	1	9.72e-05	0.515	0	0	-11.3517	18	39	9	3UTR	MIRT051094	1	1
hsa-miR-16-5p	XM_011534646	CCNJL	..((((..(.(((((((((((.&))))))))))).)...)))).	2470	2491	1	-23	1	0.0160694	0.485	0	0	-10.0568	16	21	11	3UTR		1	1
hsa-miR-16-5p	XM_011534646	CCNJL	(((((((((((..(((((....&)))))...))))))))))).	1917	1937	1	-19.2	1	0.0088552	0.559	0	0	-8.57351	16	20	11	3UTR		1	1
hsa-miR-16-5p	XM_011542091	LUZP1	(((((((((((...........&))))))))))).	7057	7069	1	-19.1	1	0.0087431	0.529	0	0	-10.3988	11	12	11	3UTR	MIRT001445	1	1
hsa-miR-16-5p	XM_011545563	RPS6KA3	(((.(((((((.....(((((.&)))))..)))))))))).	5071	5089	1	-17.7	1	0.00338119	0.603	0	0	-13.4309	15	18	10	3UTR	MIRT031564	1	1
hsa-miR-16-5p	XM_017005931	TMCC1	.(((((((((((((((((.(((&))).))))))))..))))))))).	3351	3375	1	-22.9	1	0.013568	0.647	0	0	-3.79332	20	24	9	3UTR	MIRT031658	1	1
hsa-miR-16-5p	XM_017005934	TMCC1	.(((((((((((((((((.(((&))).))))))))..))))))))).	3401	3425	1	-22.9	1	0.013568	0.647	0	0	-3.79332	20	24	9	3UTR	MIRT031658	1	1
hsa-miR-16-5p	XM_017007529	SLC4A7	((((((((....((((((((..&)))))))))))))))).	4456	4473	1	-19	1	0.00401306	0.632	0	0	-12.408	16	17	16	3UTR		1	1
hsa-miR-16-5p	XM_017016497	HPSE2	((((((((.(((......(((.&)))...))))))))))).	1820	1838	1	-18	1	0.000183504	0.529	0	0	-8.10843	14	18	11	3UTR		1	1
hsa-miR-16-5p	XM_017021870	ARPP19	((((((((((............&)))))))))).	515	526	1	-16.2	1	5.75e-07	0.574	0	0	-13.2236	10	11	10	3UTR		1	1
hsa-miR-16-5p	XM_017024350	EZH1	.((((((((........((((.&)))))))))))).	3202	3215	1	-16.2	1	0.000821167	0.441	0	0	-14.3219	12	13	12	3UTR	MIRT146015	1	1
hsa-miR-16-5p	XM_017029713	RPS6KA3	(((.(((((((.....(((((.&)))))..)))))))))).	5058	5076	1	-17.7	1	0.00338119	0.603	0	0	-13.4309	15	18	10	3UTR	MIRT031564	1	1
hsa-miR-16-5p	XM_017029715	RPS6KA3	(((.(((((((.....(((((.&)))))..)))))))))).	5111	5129	1	-17.7	1	0.00338119	0.603	0	0	-13.4309	15	18	10	3UTR	MIRT031564	1	1
hsa-miR-16-5p	XM_017029716	RPS6KA3	(((.(((((((.....(((((.&)))))..)))))))))).	5208	5226	1	-17.7	1	0.00338119	0.603	0	0	-13.4309	15	18	10	3UTR	MIRT031564	1	1
hsa-miR-16-5p	XM_017029717	RPS6KA3	(((.(((((((.....(((((.&)))))..)))))))))).	4943	4961	1	-17.7	1	0.00338119	0.603	0	0	-13.4309	15	18	10	3UTR	MIRT031564	1	1
hsa-miR-16-5p	XM_017029718	RPS6KA3	(((.(((((((.....(((((.&)))))..)))))))))).	4916	4934	1	-17.7	1	0.00338119	0.603	0	0	-13.4309	15	18	10	3UTR	MIRT031564	1	1
hsa-miR-16-5p	XM_024448603	PPP6R3	((((((((((........((((&.)))))))))))))).	3745	3766	1	-18.8	1	0.000193342	0.574	0	0	-13.2236	14	16	14	3UTR	MIRT737990	1	1
hsa-miR-16-5p	XM_024454270	SLC4A4	((((((((((((.((((((((.&.))))))))...)))))))..))))).	4550	4583	1	-18.6	1	0.00645041	0.515	0	0	-5.22671	20	27	8	3UTR		1	1
hsa-miR-16-5p	NM_014721	PHACTR2	..(((((((((...((((.((.&))..))))...))))))))).	3024	3045	1	-18.5	1	0.00363143	0.574	0.357204	0.623419	-10.4498	15	21	9	3UTR		1	1
hsa-miR-16-5p	NM_014761	IST1	.(((((((((((((........&))))))))))))).	1848	1862	1	-18.7	1	0.00466658	0.397	0.998782	1.35646	-4.76182	13	14	13	3UTR		1	1
hsa-miR-16-5p	NM_014779	TSC22D2	..(((((((.(((((.......&))))).))))))).	9222	9236	1	-18.5	1	0.000634697	0.632	0.739843	0.286406	-6.43256	12	14	7	3UTR	MIRT465160	1	1
hsa-miR-16-5p	NM_014782	ARMCX2	.(((((((((............&))))))))).	2604	2614	1	-16.3	1	0.0781268	0.676	0.303289	0.745017	-13.0794	9	10	9	3UTR	MIRT051213	1	1
hsa-miR-16-5p	NM_014827	ZC3H11A	..((((((((.((((((((((.&))))))))))))))))..)).	4679	4700	1	-19.9	1	0.0195488	0.647	1.47305	1.59151	-7.78178	18	21	16	3UTR	MIRT031561	1	1
hsa-miR-16-5p	NM_014969	WDR47	((((((((((............&)))))))))).	3208	3219	1	-17.4	1	6.38e-05	0.5	5.43407	5.55957	-13.2236	10	11	10	3UTR		1	1
hsa-miR-16-5p	NM_015008	TMCC1	.(((((((((((((((((.(((&))).))))))))..))))))))).	2876	2900	1	-22.9	1	0.013568	0.647	6.81371	3.79918	-3.79332	20	24	9	3UTR	MIRT031658	1	1
hsa-miR-16-5p	NM_015074	KIF1B	((((((((((...(((((((..&))))))).)))))))))).	5952	5971	1	-19.1	1	0.00293419	0.485	1.33683	0.587963	-11.3983	17	19	10	3UTR	MIRT031988	1	1
hsa-miR-16-5p	NM_015238	WWC1	(((((.(((((((((((((((.&)))))...)))))))))).))))).	3905	3930	1	-21.4	1	0.00724941	0.618	2.62129	1.73577	-5.83853	20	25	10	3UTR		1	1
hsa-miR-16-5p	NM_015328	AHCYL2	..((((((.....(((((((((&))))))))))))))).	4032	4048	1	-19.1	1	0.00103471	0.515	0.29615	0.550234	-14.7166	15	16	15	3UTR	MIRT031640	1	1
hsa-miR-16-5p	NM_015642	ZBTB20	(((((((((......((((((.&.))))))))))))))).	7530	7553	1	-21.6	1	5.06e-05	0.529	0.20157	0.212816	-14.2331	15	17	15	3UTR		1	1
hsa-miR-16-5p	NM_015642	ZBTB20	(((((((......(((((((..&)))))))......))))))).	9688	9709	1	-17.9	1	0.025502	0.618	2.39175	1.89695	-16.0108	14	21	7	3UTR		1	1
hsa-miR-16-5p	NM_016257	HPCAL4	.((((((((((.....((((..&)))))))))))))).	4490	4505	1	-17.5	1	0.00257049	0.412	0.936265	2.18479	-10.2546	14	15	14	3UTR		1	1
hsa-miR-16-5p	NM_016370	RAB9B	((((((((((((((..(((((.&)))))......))))))))....)))))).	1116	1146	1	-22.3	1	0.0248901	0.588	1.2975	1.43095	-4.90607	19	30	8	3UTR	MIRT000803	1	1
hsa-miR-16-5p	NM_016525	UBAP1	(((((((((.......(((((.&.))))).....))))))))).	2047	2100	1	-21.8	1	0.00118776	0.324	0.196789	1.14704	-14.4661	14	21	9	3UTR		1	1
hsa-miR-16-5p	NM_017423	GALNT7	..(((((((((((((.......&.))))))))))))).	2608	2662	1	-19.7	1	0.0269626	0.676	1.27744	1.24385	-5.19005	13	15	13	3UTR	MIRT001466	1	1
hsa-miR-16-5p	NM_017548	CDV3	(((((((((.(...........&).))))))))).	2127	2139	1	-16.3	1	0.0017416	0.544	2.21453	0.795307	-11.6414	10	12	9	3UTR	MIRT031715	1	1
hsa-miR-16-5p	NM_017736	THUMPD1	..((((((((((((((..(((.&)))...)))))))))))))).	1228	1249	1	-19.3	1	0.0411237	0.662	0.170814	0.109119	-4.957	17	21	14	3UTR		1	1
hsa-miR-16-5p	NM_017913	CDC37L1	(((((((((((...........&.))))))))))).	1344	1378	1	-18.2	1	0.0618097	0.735	2.0849	2.70949	-10.3988	11	13	11	3UTR	MIRT032005	1	1
hsa-miR-16-5p	NM_018312	PPP6R3	((((((((((........((((&.)))))))))))))).	3678	3699	1	-18.8	1	0.000193342	0.574	1.27662	0.708475	-13.2236	14	16	14	3UTR	MIRT737990	1	1
hsa-miR-16-5p	NM_018424	EPB41L4B	..((((((((((..........&)))))))))).	3480	3491	1	-17.1	1	1.2e-05	0.647	0.620923	0.133087	-8.07147	10	11	10	3UTR		1	1
hsa-miR-16-5p	NM_019004	ANKIB1	.(((((((((.(((((..((..&))..))))).))))))))).	6008	6028	1	-18.2	1	0.00346619	0.603	1.81033	1.52807	-6.6181	16	20	9	3UTR		1	1
hsa-miR-16-5p	NM_019116	UBFD1	((((((((((............&)))))))))).	1596	1607	1	-17.3	1	0.0038897	0.338	0.0192812	0.204157	-13.2236	10	11	10	3UTR	MIRT032064	1	1
hsa-miR-16-5p	NM_020225	STOX2	.(((((((((((.....(((((&.)))))....))))))))))).	4582	4622	1	-22.4	1	0.00528607	0.529	2.52562	2.56243	-6.90779	16	22	11	3UTR		1	1
hsa-miR-16-5p	NM_020225	STOX2	..(((((((((.......(((.&.)))))))))))).	8850	8870	1	-19.8	1	0.00475436	0.397	-0.422606	0.0508475	-11.4183	12	14	12	3UTR		1	1
hsa-miR-16-5p	NM_020384	CLDN2	(((((((((.(...........&).))))))))).	1123	1135	1	-16.2	1	0.000476537	0.485	0.910046	0.646508	-11.6414	10	12	9	3UTR	MIRT735443	1	1
hsa-miR-16-5p	NM_020436	SALL4	((((((((((...((((((((.&)))))))).)))))))))).	4227	4247	1	-21.8	1	0.00829521	0.574	3.39021	3.00663	-11.3983	18	20	10	3UTR		1	1
hsa-miR-16-5p	NM_020640	DCUN1D1	.(((((((.((((((.((((..&)))).))))))...))))))).	6188	6210	1	-19.3	1	0.008722	0.471	2.01031	1.85659	-5.08276	17	22	7	3UTR		1	1
hsa-miR-16-5p	NM_020791	TAOK1	(((((((..((((((((((((.&)))))))..)))))..))))))).	4981	5005	1	-23.9	1	0.03296	0.544	2.51907	2.89996	-7.3076	19	24	7	3UTR	MIRT196451	1	1
hsa-miR-16-5p	NM_020791	TAOK1	(((((((((((......(((..&)))......))))))))))).	10538	10559	1	-19.5	1	0.0250045	0.603	0.548099	0.684561	-10.3988	14	21	11	3UTR	MIRT196451	1	1
hsa-miR-16-5p	NM_020858	SEMA6D	((((((((((.((((.......&)))))))))))))).	4695	4710	1	-16.7	1	0.0181315	0.618	3.8936	1.38257	-6.9954	14	15	14	3UTR		1	1
hsa-miR-16-5p	NM_021090	MTMR3	(((((((((.(....((((((.&))))))....).))))))))).	7761	7783	1	-19.5	1	0.00294457	0.559	0.150157	0.147789	-11.4083	16	22	9	3UTR	MIRT300993	1	1
hsa-miR-16-5p	NM_021145	DMTF1	((((((((((.......((((.&)))).......))).))))))).	3070	3093	1	-19.1	1	0.0133995	0.588	0.208216	0.457733	-13.2236	14	23	7	3UTR	MIRT031727	1	1
hsa-miR-16-5p	NM_021154	PSAT1	((((((((.(((((.....(((&)))....)))))...)))))))).	1309	1333	1	-18.4	1	0.0104041	0.632	0.636756	0.213402	-5.96246	16	24	8	3UTR	MIRT001427	1	1
hsa-miR-16-5p	NM_021255	PELI2	..((((((.(((....((((((&))))))....))).)))))).	4326	4347	1	-19.6	1	0.000716339	0.574	1.09254	1.11192	-9.12786	15	21	6	3UTR		1	1
hsa-miR-16-5p	NM_021828	HPSE2	((((((((.(((......(((.&)))...))))))))))).	2204	2222	1	-18	1	0.000183504	0.529	-0.0142256	-0.137139	-8.10843	14	18	11	3UTR		1	1
hsa-miR-16-5p	NM_022470	ZMAT3	((((((((.((((.(((((((.&)))))))..))))......)))))))).	3588	3616	1	-21	1	0.00277772	0.765	0.0669071	-0.161113	-5.8508	19	28	8	3UTR	MIRT500423	1	1
hsa-miR-16-5p	NM_022755	IPPK	..(((((((((.......((((&)))).....))))))))).	2518	2537	1	-19.2	1	0.000103018	0.412	0.742441	1.04863	-11.4183	13	19	9	3UTR	MIRT031925	1	1
hsa-miR-16-5p	NM_022977	ACSL4	(((((((((.(((.........&.))).))))))))).	4464	4487	1	-18.5	1	0.000144667	0.691	4.98181	4.0144	-7.00542	12	15	9	3UTR		1	1
hsa-miR-16-5p	NM_024320	PRR15L	..((.((((((((((((.(((.&.))).)))))))))))).)).	684	731	1	-19.9	1	0.00273679	0.529	0.206571	0.069723	-9.07604	17	21	12	3UTR		1	1
hsa-miR-16-5p	NM_024565	CCNJL	..((((..(.(((((((((((.&))))))))))).)...)))).	2695	2716	1	-23	1	0.0160694	0.485	0.60533	0.596793	-10.0568	16	21	11	3UTR		1	1
hsa-miR-16-5p	NM_024565	CCNJL	(((((((((((..(((((....&)))))...))))))))))).	2142	2162	1	-19.2	1	0.0088552	0.559	0.0650294	-0.0187638	-8.57351	16	20	11	3UTR		1	1
hsa-miR-16-5p	NM_024630	ZDHHC14	((((((((((((((((.(((((&)))))..))).))))....))))))))).	2765	2794	1	-18.6	1	0.00258991	0.529	1.35634	1.11874	-3.93757	21	29	9	3UTR		1	1
hsa-miR-16-5p	NM_025142	TAOK1	(((((((..((((((((((((.&)))))))..)))))..))))))).	3975	3999	1	-23.9	1	0.03296	0.544	2.51907	2.89996	-7.3076	19	24	7	3UTR	MIRT196451	1	1
hsa-miR-16-5p	NM_025142	TAOK1	(((((((((((......(((..&)))......))))))))))).	9532	9553	1	-19.5	1	0.0250045	0.603	0.548099	0.684561	-10.3988	14	21	11	3UTR	MIRT196451	1	1
hsa-miR-16-5p	NM_030621	DICER1	((((((((((........((((&))))..)))))))))).	8544	8561	1	-18.2	1	0.000972548	0.662	5.58765	5.80272	-13.2236	14	17	10	3UTR	MIRT051245	1	1
hsa-miR-16-5p	NM_002336	LRP6	.(((((((((((((((..(((.&))).)))))))..............)))))))).	9909	9943	1	-21.9	1	3.24e-05	0.632	2.2707	2.1605	-3.79332	18	34	8	3UTR		1	1
hsa-miR-16-5p	NM_002697	POU2F1	...((((((((((.(((((((.&)))))))..)))))))))).	13461	13481	1	-22.9	1	9.33e-05	0.544	-0.0224004	0.600338	-7.37138	17	20	10	3UTR		1	1
hsa-miR-16-5p	NM_003026	SH3GL2	.((((((((((((((.((((..&.))))..))))).))))))))).	2461	2498	1	-20.4	1	0.00271666	0.515	2.25707	2.4042	-4.02637	18	23	9	3UTR		1	1
hsa-miR-16-5p	NM_003046	SLC7A2	(((((((.((.((((...(((.&)))...)))).))))))))).	4012	4033	1	-19.9	1	7.28e-05	0.544	0.451464	0.342271	-9.30903	16	21	9	3UTR		1	1
hsa-miR-16-5p	NM_003046	SLC7A2	((((((((.(((((((......&))))))).)))))))).	4885	4902	1	-18.7	1	0.0364823	0.471	0.690523	0.164179	-4.99396	15	17	8	3UTR		1	1
hsa-miR-16-5p	NM_003137	SRPK1	((((((((.(.......((((.&))))....))))))))).	3181	3199	1	-17.4	1	0.0426415	0.691	1.5478	2.44915	-14.28	13	18	9	3UTR	MIRT031711	1	1
hsa-miR-16-5p	NM_003243	TGFBR3	(((((((..(((((((((((((&))))).................))))))))..))))))).	5706	5746	1	-18	1	0.00459133	0.632	1.58911	3.31422	-7.3076	20	40	8	3UTR	MIRT565399	1	1
hsa-miR-16-5p	NM_003483	HMGA2	((((((((.((((.........&)))).)))))))).	2414	2428	1	-16	1	0.0598329	0.676	5.0491	2.69961	-6.8193	12	14	8	3UTR	MIRT006804	1	1
hsa-miR-16-5p	NM_003624	RANBP3	(((((((((((...........&))))))))))).	2264	2276	1	-17.3	1	0.0162634	0.515	3.09084	2.29884	-10.3988	11	12	11	3UTR		1	1
hsa-miR-16-5p	NM_004093	EFNB2	..((((((((.......((((.&)))))))))))).	1974	1987	1	-18.9	1	8.53e-05	0.338	-0.0164964	1.15533	-14.243	12	13	12	3UTR	MIRT032048	1	1
hsa-miR-16-5p	NM_004311	ARL3	..(((((((((((((((((...&.))))))))))..))))))).	1086	1137	1	-21.1	1	0.000370694	0.529	0.632571	0.624408	-4.957	17	21	10	3UTR	MIRT031723	1	1
hsa-miR-16-5p	NM_004370	COL12A1	.((((((((........(((((&))))))))))))).	9518	9532	1	-19.3	1	0.000474614	0.588	2.78967	3.86389	-14.3219	13	14	13	3UTR		1	1
hsa-miR-16-5p	NM_004458	ACSL4	(((((((((.(((.........&.))).))))))))).	4152	4175	1	-18.5	1	0.000144667	0.691	3.61583	2.92644	-7.00542	12	15	9	3UTR		1	1
hsa-miR-16-5p	NM_004522	KIF5C	((((((((((............&)))))))))).	4507	4518	1	-16.2	1	0.000880044	0.632	0	0	-13.2236	10	11	10	3UTR		1	1
hsa-miR-16-5p	NM_004525	LRP2	((((((.((((...((((((((&))))))))...)))))))))).	14394	14416	1	-18.6	1	0.0324213	0.691	3.92731	3.15362	-10.974	18	22	10	3UTR		1	1
hsa-miR-16-5p	NM_004736	XPR1	..(((((.(.(((((((.((((&)))).))))))).)))))).	5655	5675	1	-19.2	1	0.0417801	0.588	0.324071	0.276784	-8.51314	17	20	7	3UTR		1	1
hsa-miR-16-5p	NM_004738	VAPB	((((((((((((..........&)))))))))))).	1733	1746	1	-20.8	1	0.000264347	0.544	0.663852	1.26429	-7.05204	12	13	12	3UTR		1	1
hsa-miR-16-5p	NM_004798	KIF3B	..(((((((.(......(((((&)))))).))))))).	5487	5502	1	-18.7	1	0.000115565	0.353	0.975681	1.1423	-12.6608	13	15	7	3UTR	MIRT152737	1	1
hsa-miR-16-5p	NM_004852	ONECUT2	..((((.(((.(((((((((..&)))))))))))))))).	16315	16332	1	-16.7	1	0.00942847	0.603	1.07883	1.82964	-9.32546	16	17	16	3UTR	MIRT031575	1	1
hsa-miR-16-5p	NM_005391	PDK3	..((((((((((..........&)))))))))).	1670	1681	1	-17.1	1	0.000161881	0.603	0.0369994	0.162414	-8.07147	10	11	10	3UTR		1	1
hsa-miR-16-5p	NM_005414	SKIL	(((((((((((((.........&.))))))))))))).	3355	3376	1	-19.6	1	0.00215992	0.588	0.0253658	0.183582	-5.76291	13	15	13	3UTR		1	1
hsa-miR-16-5p	NM_005436	CCDC6	((((((((((.......((((.&))))....)))))))))).	4246	4265	1	-18.7	1	0.0127334	0.515	4.2534	4.22929	-13.2236	14	19	10	3UTR		1	1
hsa-miR-16-5p	NM_005759	ABI2	((((((((..(.(((((((((.&))))))))))..)))))))).	2603	2624	1	-24.7	1	0.00019189	0.559	0.880648	0.595631	-9.58327	18	21	10	3UTR		1	1
hsa-miR-16-5p	NM_005759	ABI2	(((((((((((((((..(((((&)))))...)))).......))))))))))).	2233	2264	1	-20.4	1	0.00332645	0.544	0.417393	0.237072	-4.17062	20	31	11	3UTR		1	1
hsa-miR-16-5p	NM_006080	SEMA3A	.((((((((.....((((((..&))))))..)))))))).	3271	3288	1	-18.5	1	0.000931086	0.735	1.0577	0.525592	-13.3534	14	17	8	3UTR		1	1
hsa-miR-16-5p	NM_006136	CAPZA2	((((((((.(((.....((((.&.))))))).)))))))).	1300	1330	1	-18.7	1	0.0112455	0.632	2.98225	1.63512	-8.10843	15	18	8	3UTR	MIRT031933	1	1
hsa-miR-16-5p	NM_006532	ELL	((((((((.((((....(((..&)))....)))))))))))).	2706	2726	1	-18.3	1	0.00606779	0.485	1.3177	1.39953	-6.8193	15	20	12	3UTR		1	1
hsa-miR-16-5p	NM_006570	RRAGA	.(((((((((((......(((.&)))......))))))))))).	1269	1290	1	-18.9	1	0.00144335	0.5	2.02392	0.608078	-6.90779	14	21	11	3UTR		1	1
hsa-miR-16-5p	NM_006628	ARPP19	((((((((((............&)))))))))).	604	615	1	-16.2	1	5.75e-07	0.574	0.0306728	0.0434351	-13.2236	10	11	10	3UTR		1	1
hsa-miR-16-5p	NM_006936	SUMO3	.(((((((((............&.))))))))).	1385	1403	1	-16.7	1	0.0140659	0.588	5.01513	2.75719	-13.0794	9	11	9	3UTR		1	1
hsa-miR-16-5p	NM_006939	SOS2	...(((((.(((((((((((((&)))))))))))))))))).	4811	4830	1	-23.8	1	0.000176532	0.662	5.76695	5.34106	-7.57093	18	19	18	3UTR		1	1
hsa-miR-16-5p	NM_006947	SRP72	(((((((((.....((((((((&.))))))))..))))))))).	3213	3255	1	-19.2	1	0.0159831	0.662	0.973952	0.701183	-13.4976	17	21	9	3UTR	MIRT031562	1	1
hsa-miR-16-5p	NM_007222	ZHX1	.(((((((.(((......(((.&))).......))).))))))).	4340	4362	1	-18.3	1	0.00423685	0.765	1.98843	1.8788	-7.96418	13	22	7	3UTR		1	1
hsa-miR-16-5p	NM_007320	RANBP3	(((((((((((...........&))))))))))).	2075	2087	1	-17.3	1	0.0162634	0.515	4.23636	3.80874	-10.3988	11	12	11	3UTR		1	1
hsa-miR-16-5p	NM_007322	RANBP3	(((((((((((...........&))))))))))).	2279	2291	1	-17.3	1	0.0162634	0.515	2.92519	2.0488	-10.3988	11	12	11	3UTR		1	1
hsa-miR-16-5p	NM_012199	AGO1	(((((((((((((((((((((.&)))))))))))).......).)))))))).	12709	12739	1	-20.2	1	0.00366368	0.559	0.361395	0.316601	-3.93757	21	30	12	3UTR		1	1
hsa-miR-16-5p	NM_012219	MRAS	(((((((((.(...........&).))))))))).	2702	2714	1	-16.2	1	1.34e-05	0.382	0.831444	-0.399679	-11.6414	10	12	9	3UTR		1	1
hsa-miR-16-5p	NM_013392	NRBP1	..((((((.((((.....((((&))))....)))))))))).	2133	2152	1	-18.1	1	0.00150315	0.54	0.760378	2.20124	-7.83873	14	19	10	3UTR		1	1
hsa-miR-16-5p	NM_013396	USP25	((((((((.((((((..(((((&)))))....)))))).)))))))).	3641	3666	1	-18.4	1	0.00137697	0.662	5.01314	3.37072	-5.22701	19	25	8	3UTR		1	1
hsa-miR-16-5p	NM_013410	AK4	(((((((((.............&))))))))).	1916	1926	1	-16.6	1	0.0110214	0.647	1.73047	0.384547	-14.4661	9	10	9	3UTR		1	1
hsa-miR-16-5p	NM_014007	ZBTB43	((((((((..(((((((.(((.&))).))))....)))..)))))))).	5598	5624	1	-20	1	0.00559911	0.574	3.5754	1.98511	-6.23647	18	26	8	3UTR		1	1
hsa-miR-16-5p	NM_014488	RAB30	(((((((((((...........&))))))))))).	2364	2376	1	-17.6	1	0.000227176	0.647	0.572695	0.521605	-10.3988	11	12	11	3UTR	MIRT001424	1	1
hsa-miR-16-5p	NM_001318509	ACSL4	(((((((((.(((.........&.))).))))))))).	4446	4469	1	-18.5	1	0.000144667	0.691	4.01307	4.25775	-7.00542	12	15	9	3UTR		1	1
hsa-miR-16-5p	NM_001318510	ACSL4	(((((((((.(((.........&.))).))))))))).	4155	4178	1	-18.5	1	0.000144667	0.691	3.63764	3.15951	-7.00542	12	15	9	3UTR		1	1
hsa-miR-16-5p	NM_001318510	ACSL4	((((((((.(((((((..(((.&)))))))))))))))))).	3190	3209	1	-18.4	1	0.00146472	0.706	3.38392	4.75621	-4.99396	18	19	18	3UTR		1	1
hsa-miR-16-5p	NM_001319238	ZC3H11A	..((((((((.((((((((((.&))))))))))))))))..)).	5108	5129	1	-19.9	1	0.0195488	0.647	1.47305	1.59151	-7.78178	18	21	16	3UTR	MIRT031561	1	1
hsa-miR-16-5p	NM_001319239	ZC3H11A	..((((((((.((((((((((.&))))))))))))))))..)).	5003	5024	1	-19.9	1	0.0195488	0.647	1.47305	1.59151	-7.78178	18	21	16	3UTR	MIRT031561	1	1
hsa-miR-16-5p	NM_001321193	TBL1XR1	.((((((((((..(((((((((&)))))))))...))).))))))).	4479	4503	1	-22.1	1	0.00252527	0.574	2.25987	1.84334	-8.42926	19	24	9	3UTR	MIRT726355	1	1
hsa-miR-16-5p	NM_001321194	TBL1XR1	.((((((((((..(((((((((&)))))))))...))).))))))).	4821	4845	1	-22.1	1	0.00252527	0.574	2.88603	1.8139	-8.42926	19	24	9	3UTR	MIRT726355	1	1
hsa-miR-16-5p	NM_001321357	NRBP1	..((((((.((((.....((((&))))....)))))))))).	2844	2863	1	-18.1	1	0.00150315	0.54	0.760378	2.20124	-7.83873	14	19	10	3UTR		1	1
hsa-miR-16-5p	NM_001321359	NRBP1	..((((((.((((.....((((&))))....)))))))))).	2157	2176	1	-18.1	1	0.00150315	0.54	0.760378	2.20124	-7.83873	14	19	10	3UTR		1	1
hsa-miR-16-5p	NM_001330309	ARPP19	((((((((((((..(((((...&.))))).)))))))))))).	948	976	1	-20	1	5.75e-07	0.574	0.219264	0.314457	-6.08354	17	20	12	3UTR		1	1
hsa-miR-16-5p	NM_001330616	AK4	(((((((((.............&))))))))).	1713	1723	1	-16.6	1	0.0110214	0.647	1.73047	0.384547	-14.4661	9	10	9	3UTR		1	1
hsa-miR-16-5p	NM_001348800	ZBTB20	(((((((((......((((((.&.))))))))))))))).	7890	7913	1	-21.6	1	5.06e-05	0.529	0.357719	0.516471	-14.2331	15	17	15	3UTR		1	1
hsa-miR-16-5p	NM_001349772	RUBCNL	..((((((((((...((((((.&))))))...))))))).))).	2523	2544	1	-21.1	1	0.000110596	0.618	0.528871	0.925975	-7.83842	16	21	7	3UTR		1	1
hsa-miR-16-5p	NM_001352361	PPP6R3	((((((((((........((((&.)))))))))))))).	3580	3601	1	-18.8	1	0.000193342	0.574	1.27662	0.708475	-13.2236	14	16	14	3UTR	MIRT737990	1	1
hsa-miR-16-5p	NM_001365848	POU2F1	...((((((((((.(((((((.&)))))))..)))))))))).	13955	13975	1	-22.9	1	9.33e-05	0.544	-0.0224004	0.600338	-7.37138	17	20	10	3UTR		1	1
hsa-miR-16-5p	NM_001365951	KIF1B	((((((((((...(((((((..&))))))).)))))))))).	6226	6245	1	-19.1	1	0.00293419	0.485	1.33683	0.587963	-11.3983	17	19	10	3UTR	MIRT031988	1	1
hsa-miR-16-5p	NM_001365952	KIF1B	((((((((((...(((((((..&))))))).)))))))))).	6040	6059	1	-19.1	1	0.00293419	0.485	1.33683	0.587963	-11.3983	17	19	10	3UTR	MIRT031988	1	1
hsa-miR-16-5p	NM_001370208	FBXL20	...((((((((((((((((((.&))))....)))))))).)))))).	6345	6369	1	-20.6	1	0.010262	0.515	0.477514	0.26311	-6.51454	18	24	8	3UTR	MIRT548276	1	1
hsa-miR-16-5p	NM_001370338	SLC7A2	(((((((.((.((((...(((.&)))...)))).))))))))).	4065	4086	1	-19.9	1	7.28e-05	0.544	0.451464	0.342271	-9.30903	16	21	9	3UTR		1	1
hsa-miR-16-5p	NM_001370338	SLC7A2	((((((((.(((((((......&))))))).)))))))).	4938	4955	1	-18.7	1	0.0364823	0.471	0.690523	0.164179	-4.99396	15	17	8	3UTR		1	1
hsa-miR-16-5p	NM_001374327	TBL1XR1	.((((((((((..(((((((((&)))))))))...))).))))))).	4626	4650	1	-22.1	1	0.00252527	0.574	2.02906	1.49979	-8.42926	19	24	9	3UTR	MIRT726355	1	1
hsa-miR-16-5p	NM_001375670	ABI2	((((((((..(.(((((((((.&))))))))))..)))))))).	2804	2825	1	-24.7	1	0.00019189	0.559	0.880648	0.595631	-9.58327	18	21	10	3UTR		1	1
hsa-miR-16-5p	NM_001375670	ABI2	(((((((((((((((..(((((&)))))...)))).......))))))))))).	2434	2465	1	-20.4	1	0.00332645	0.544	0.417393	0.237072	-4.17062	20	31	11	3UTR		1	1
hsa-miR-16-5p	NM_001375698	ABI2	((((((((..(.(((((((((.&))))))))))..)))))))).	2552	2573	1	-24.7	1	0.00019189	0.559	0.880648	0.595631	-9.58327	18	21	10	3UTR		1	1
hsa-miR-16-5p	NM_001375698	ABI2	(((((((((((((((..(((((&)))))...)))).......))))))))))).	2182	2213	1	-20.4	1	0.00332645	0.544	0.417393	0.237072	-4.17062	20	31	11	3UTR		1	1
hsa-miR-16-5p	NM_001376336	ZC3H11A	..((((((((.((((((((((.&))))))))))))))))..)).	4380	4401	1	-19.9	1	0.0195488	0.647	1.47305	1.59151	-7.78178	18	21	16	3UTR	MIRT031561	1	1
hsa-miR-16-5p	NM_001376342	ZC3H11A	..((((((((.((((((((((.&))))))))))))))))..)).	5822	5843	1	-19.9	1	0.0195488	0.647	1.47305	1.59151	-7.78178	18	21	16	3UTR	MIRT031561	1	1
hsa-miR-16-5p	NM_001376360	ZC3H11A	..((((((((.((((((((((.&))))))))))))))))..)).	5803	5824	1	-19.9	1	0.0195488	0.647	1.47305	1.59151	-7.78178	18	21	16	3UTR	MIRT031561	1	1
hsa-miR-16-5p	NM_001570	IRAK2	((((((((((((....(((((.&)))))...)))))))))))).	3015	3036	1	-22	1	0.0247487	0.544	0.537146	-0.060998	-7.05204	17	21	12	3UTR		1	1
hsa-miR-16-5p	NM_001759	CCND2	(((((((((((((((((((((.&)))..))))))).)).....))))))))).	2891	2921	1	-20	1	0.00210406	0.735	5.82175	4.89936	-3.93757	21	30	9	3UTR	MIRT003431	1	1
hsa-miR-16-5p	NM_002027	FNTA	(((((((((.(((.........&))).))))))))).	1308	1322	1	-17.9	1	0.000198516	0.574	1.86329	0.844704	-7.00542	12	14	9	3UTR	MIRT031435	1	1
hsa-miR-16-5p	NM_000052	ATP7A	..(((((((........((((.&))))......))))))).	4670	4688	1	-19.5	1	0.000222845	0.544	0.669374	1.3544	-15.4856	11	18	7	3UTR		1	1
hsa-miR-16-5p	NM_000084	CLCN5	.((.(((((.(.(((((((((.&))))))))).).))))).)).	4834	4855	1	-21.9	1	0.0535499	0.662	2.24244	1.28152	-11.4147	17	21	9	3UTR		1	1
hsa-miR-16-5p	NM_000315	PTH	((((((((.(((..........&))).)))))))).	492	505	1	-15.3	1	0.133741	0.588	0.724669	1.09837	-8.10843	11	13	8	3UTR		1	1
hsa-miR-16-5p	NM_000388	CASR	..((((((((..((((.(((((&)))))))))..)))))))).	9237	9257	1	-20.5	1	0.000200161	0.618	0.0787795	-0.00237876	-11.1286	17	20	9	3UTR		1	1
hsa-miR-16-5p	NM_000633	BCL2	((((((((((.....(((((..&)))))..)))))))))).	4121	4139	1	-18.6	1	0.0239187	0.632	0.699206	0.262885	-12.9906	15	18	10	3UTR	MIRT001800	1	1
hsa-miR-16-5p	NM_001005353	AK4	(((((((((.............&))))))))).	2046	2056	1	-16.6	1	0.0110214	0.647	1.02345	0.62731	-14.4661	9	10	9	3UTR		1	1
hsa-miR-16-5p	NM_001008539	SLC7A2	(((((((.((.((((...(((.&)))...)))).))))))))).	4019	4040	1	-19.9	1	7.28e-05	0.544	0.451464	0.342271	-9.30903	16	21	9	3UTR		1	1
hsa-miR-16-5p	NM_001008539	SLC7A2	((((((((.(((((((......&))))))).)))))))).	4892	4909	1	-18.7	1	0.0364823	0.471	0.690523	0.164179	-4.99396	15	17	8	3UTR		1	1
hsa-miR-16-5p	NM_001039711	DEDD	.((((((((........(((((&))))))))))))).	2243	2257	1	-17.8	1	0.00346827	0.618	0.804669	0.985566	-14.3219	13	14	13	3UTR		1	1
hsa-miR-16-5p	NM_001039712	DEDD	.((((((((........(((((&))))))))))))).	2215	2229	1	-17.8	1	0.00346827	0.618	1.48062	1.01294	-14.3219	13	14	13	3UTR		1	1
hsa-miR-16-5p	NM_001040450	MINDY2	(((((((((((...........&.)).))))))))).	4342	4358	1	-16.3	1	0.00115618	0.647	1.04822	0.699685	-10.3988	11	14	9	3UTR		1	1
hsa-miR-16-5p	NM_001040453	MINDY2	(((((((((((...........&.)).))))))))).	4339	4355	1	-16.3	1	0.00115618	0.647	1.04822	0.699685	-10.3988	11	14	9	3UTR		1	1
hsa-miR-16-5p	NM_001045	SLC6A4	(((((((((((...........&))))))))))).	2698	2710	1	-17.4	1	0.00503797	0.559	-0.399318	0.386418	-10.3988	11	12	11	3UTR	MIRT053620	1	1
hsa-miR-16-5p	NM_001085049	MRAS	(((((((((.(...........&).))))))))).	2213	2225	1	-16.2	1	1.34e-05	0.382	0.831444	-0.399679	-11.6414	10	12	9	3UTR		1	1
hsa-miR-16-5p	NM_001085357	BTLA	(((((((((.(...........&).))))))))).	2011	2023	1	-16.2	1	0.0109994	0.632	0.526706	0.161315	-11.6414	10	12	9	3UTR		1	1
hsa-miR-16-5p	NM_001100164	PHACTR2	..(((((((((...((((.((.&))..))))...))))))))).	3126	3147	1	-18.5	1	0.00363143	0.574	0.357204	0.623419	-10.4498	15	21	9	3UTR		1	1
hsa-miR-16-5p	NM_001100165	PHACTR2	..(((((((((...((((.((.&))..))))...))))))))).	2886	2907	1	-18.5	1	0.00363143	0.574	0.357204	0.623419	-10.4498	15	21	9	3UTR		1	1
hsa-miR-16-5p	NM_001100166	PHACTR2	..(((((((((...((((.((.&))..))))...))))))))).	2784	2805	1	-18.5	1	0.00363143	0.574	0.357204	0.623419	-10.4498	15	21	9	3UTR		1	1
hsa-miR-16-5p	NM_001109662	HECTD4	..(((((((.((((((((((..&.)))))))))).))))))).	15718	15750	1	-21.2	1	0.000182806	0.574	1.48023	1.06145	-6.19951	17	20	10	3UTR		1	1
hsa-miR-16-5p	NM_001114118	NCBP3	(((((((((....(((.((((.&)))).))).....))))))))).	5516	5539	1	-19.9	1	0.00759229	0.574	0.680462	0.0654061	-12.6408	16	23	9	3UTR		1	1
hsa-miR-16-5p	NM_001114122	CHEK1	(((((((((....(((((.((.&)).))))).))))))))).	2355	2374	1	-19.5	1	0.00156037	0.588	2.81451	1.40789	-12.6408	16	19	9	3UTR	MIRT265077	1	1
hsa-miR-16-5p	NM_001127898	CLCN5	.((.(((((.(.(((((((((.&))))))))).).))))).)).	5225	5246	1	-21.9	1	0.0535499	0.662	2.24244	1.28152	-11.4147	17	21	9	3UTR		1	1
hsa-miR-16-5p	NM_001127899	CLCN5	.((.(((((.(.(((((((((.&))))))))).).))))).)).	5484	5505	1	-21.9	1	0.0535499	0.662	2.24244	1.28152	-11.4147	17	21	9	3UTR		1	1
hsa-miR-16-5p	NM_001128224	TMCC1	.(((((((((((((((((.(((&))).))))))))..))))))))).	2866	2890	1	-22.9	1	0.013568	0.647	6.32041	3.84513	-3.79332	20	24	9	3UTR	MIRT031658	1	1
hsa-miR-16-5p	NM_001130720	AHCYL2	..((((((.....(((((((((&))))))))))))))).	4029	4045	1	-19.1	1	0.00103471	0.515	0.29615	0.550234	-14.7166	15	16	15	3UTR	MIRT031640	1	1
hsa-miR-16-5p	NM_001130722	AHCYL2	..((((((.....(((((((((&))))))))))))))).	3708	3724	1	-19.1	1	0.00103471	0.515	0.29615	0.550234	-14.7166	15	16	15	3UTR	MIRT031640	1	1
hsa-miR-16-5p	NM_001130723	AHCYL2	..((((((.....(((((((((&))))))))))))))).	3791	3807	1	-19.1	1	0.00103471	0.515	0.29615	0.550234	-14.7166	15	16	15	3UTR	MIRT031640	1	1
hsa-miR-16-5p	NM_001134422	CDV3	(((((((((.(...........&).))))))))).	2864	2876	1	-16.3	1	0.0017416	0.544	2.21453	0.795307	-11.6414	10	12	9	3UTR	MIRT031715	1	1
hsa-miR-16-5p	NM_001134423	CDV3	(((((((((.(...........&).))))))))).	2421	2433	1	-16.3	1	0.0017416	0.544	2.21453	0.795307	-11.6414	10	12	9	3UTR	MIRT031715	1	1
hsa-miR-16-5p	NM_001134742	SLC4A4	((((((((((((.((((((((.&.))))))))...)))))))..))))).	5085	5118	1	-18.6	1	0.00645041	0.515	0	0	-5.22671	20	27	8	3UTR		1	1
hsa-miR-16-5p	NM_001135669	XPR1	..(((((.(.(((((((.((((&)))).))))))).)))))).	5460	5480	1	-19.2	1	0.0417801	0.588	0.324071	0.276784	-8.51314	17	20	7	3UTR		1	1
hsa-miR-16-5p	NM_001142326	DMTF1	((((((((((.......((((.&)))).......))).))))))).	2523	2546	1	-19.1	1	0.0133995	0.588	0.639251	1.07595	-13.2236	14	23	7	3UTR	MIRT031727	1	1
hsa-miR-16-5p	NM_001142327	DMTF1	((((((((((.......((((.&)))).......))).))))))).	2640	2663	1	-19.1	1	0.0133995	0.588	1.7317	0.817425	-13.2236	14	23	7	3UTR	MIRT031727	1	1
hsa-miR-16-5p	NM_001142386	PDK3	..((((((((((((((((((((&)))).)))))..)))))))).))).	9141	9166	1	-19.2	1	0.0026512	0.574	0.0951573	0.0682661	-4.957	20	25	8	3UTR		1	1
hsa-miR-16-5p	NM_001142546	LUZP1	(((((((((((...........&))))))))))).	6571	6583	1	-19.1	1	0.0087431	0.529	0.828677	0.699138	-10.3988	11	12	11	3UTR	MIRT001445	1	1
hsa-miR-16-5p	NM_001142550	WDR47	((((((((((............&)))))))))).	3229	3240	1	-17.4	1	6.38e-05	0.5	6.96535	5.48224	-13.2236	10	11	10	3UTR		1	1
hsa-miR-16-5p	NM_001142551	WDR47	((((((((((............&)))))))))).	3205	3216	1	-17.4	1	6.38e-05	0.5	5.43407	5.55957	-13.2236	10	11	10	3UTR		1	1
hsa-miR-16-5p	NM_001144995	CCDC85C	..((((((((((.(((((((((&))))).))))...)))))))))).	7217	7241	1	-21.9	1	0.000419478	0.338	-0.0717212	-0.284572	-6.24613	19	24	10	3UTR		1	1
hsa-miR-16-5p	NM_001145097	SKIL	(((((((((((((.........&.))))))))))))).	3244	3265	1	-19.6	1	0.00215992	0.588	0.0253658	0.183582	-5.76291	13	15	13	3UTR		1	1
hsa-miR-16-5p	NM_001145098	SKIL	(((((((((((((.........&.))))))))))))).	2864	2885	1	-19.6	1	0.00215992	0.588	0.0253658	0.183582	-5.76291	13	15	13	3UTR		1	1
hsa-miR-16-5p	NM_001145862	MTMR11	.(((((((.((((.....((((&.))))))))))))))).	2666	2705	1	-18.5	1	0.0275995	0.574	1.32786	0.666299	-6.67505	15	17	15	3UTR		1	1
hsa-miR-16-5p	NM_001161661	WWC1	(((((.(((((((((((((((.&)))))...)))))))))).))))).	3923	3948	1	-21.4	1	0.00724941	0.618	2.62129	1.73577	-5.83853	20	25	10	3UTR		1	1
hsa-miR-16-5p	NM_001164160	PPP6R3	((((((((((........((((&.)))))))))))))).	3831	3852	1	-18.8	1	0.000193342	0.574	1.27662	0.708475	-13.2236	14	16	14	3UTR	MIRT737990	1	1
hsa-miR-16-5p	NM_001164161	PPP6R3	((((((((((........((((&.)))))))))))))).	3813	3834	1	-18.8	1	0.000193342	0.574	1.27662	0.708475	-13.2236	14	16	14	3UTR	MIRT737990	1	1
hsa-miR-16-5p	NM_001164162	PPP6R3	((((((((((........((((&.)))))))))))))).	3795	3816	1	-18.8	1	0.000193342	0.574	1.27662	0.708475	-13.2236	14	16	14	3UTR	MIRT737990	1	1
hsa-miR-16-5p	NM_001164163	PPP6R3	((((((((((........((((&.)))))))))))))).	3726	3747	1	-18.8	1	0.000193342	0.574	1.27662	0.708475	-13.2236	14	16	14	3UTR	MIRT737990	1	1
hsa-miR-16-5p	NM_001164342	ZBTB20	(((((((((......((((((.&.))))))))))))))).	7298	7321	1	-21.6	1	5.06e-05	0.529	2.31779	1.48839	-14.2331	15	17	15	3UTR		1	1
hsa-miR-16-5p	NM_001164342	ZBTB20	(((((((......(((((((..&)))))))......))))))).	9456	9477	1	-17.9	1	0.025502	0.618	3.23229	2.6989	-16.0108	14	21	7	3UTR		1	1
hsa-miR-16-5p	NM_001164343	ZBTB20	(((((((((......((((((.&.))))))))))))))).	7760	7783	1	-21.6	1	5.06e-05	0.529	1.46564	0.657006	-14.2331	15	17	15	3UTR		1	1
hsa-miR-16-5p	NM_001164344	ZBTB20	(((((((((......((((((.&.))))))))))))))).	7554	7577	1	-21.6	1	5.06e-05	0.529	0.454383	0.22871	-14.2331	15	17	15	3UTR		1	1
hsa-miR-16-5p	NM_001164344	ZBTB20	(((((((......(((((((..&)))))))......))))))).	9712	9733	1	-17.9	1	0.025502	0.618	4.04316	1.21513	-16.0108	14	21	7	3UTR		1	1
hsa-miR-16-5p	NM_001164345	ZBTB20	(((((((((......((((((.&.))))))))))))))).	7508	7531	1	-21.6	1	5.06e-05	0.529	0.543611	0.380956	-14.2331	15	17	15	3UTR		1	1
hsa-miR-16-5p	NM_001164346	ZBTB20	(((((((((......((((((.&.))))))))))))))).	7317	7340	1	-21.6	1	5.06e-05	0.529	1.27017	1.59733	-14.2331	15	17	15	3UTR		1	1
hsa-miR-16-5p	NM_001164347	ZBTB20	(((((((((......((((((.&.))))))))))))))).	7339	7362	1	-21.6	1	5.06e-05	0.529	0.871452	1.57354	-14.2331	15	17	15	3UTR		1	1
hsa-miR-16-5p	NM_001164347	ZBTB20	(((((((......(((((((..&)))))))......))))))).	9497	9518	1	-17.9	1	0.025502	0.618	2.36209	1.99472	-16.0108	14	21	7	3UTR		1	1
hsa-miR-16-5p	NM_001164440	ANKRD33B	..(((((..((((((((((((.&))))))))))))...................))))).	4737	4774	1	-22.3	1	0.0298007	0.397	-0.108757	-0.199325	-8.32703	17	37	12	3UTR		1	1
hsa-miR-16-5p	NM_001164771	SLC7A2	(((((((.((.((((...(((.&)))...)))).))))))))).	4015	4036	1	-19.9	1	7.28e-05	0.544	0.451464	0.342271	-9.30903	16	21	9	3UTR		1	1
hsa-miR-16-5p	NM_001164771	SLC7A2	((((((((.(((((((......&))))))).)))))))).	4888	4905	1	-18.7	1	0.0364823	0.471	0.690523	0.164179	-4.99396	15	17	8	3UTR		1	1
hsa-miR-16-5p	NM_001171092	CLDN2	(((((((((.(...........&).))))))))).	1314	1326	1	-16.2	1	0.000476537	0.485	0	0	-11.6414	10	12	9	3UTR	MIRT735443	1	1
hsa-miR-16-5p	NM_001171095	CLDN2	(((((((((.(...........&).))))))))).	1083	1095	1	-16.2	1	0.000476537	0.485	0.910046	0.646508	-11.6414	10	12	9	3UTR	MIRT735443	1	1
hsa-miR-16-5p	NM_001171201	UBAP1	(((((((((.......(((((.&.))))).....))))))))).	2044	2097	1	-21.8	1	0.00118776	0.324	0.196789	1.14704	-14.4661	14	21	9	3UTR		1	1
hsa-miR-16-5p	NM_001171202	UBAP1	(((((((((.......(((((.&.))))).....))))))))).	1960	2013	1	-21.8	1	0.00118776	0.324	0.196789	1.14704	-14.4661	14	21	9	3UTR		1	1
hsa-miR-16-5p	NM_001178065	CASR	..((((((((..((((.(((((&)))))))))..)))))))).	9325	9345	1	-20.5	1	0.000200161	0.618	0.0787795	-0.00237876	-11.1286	17	20	9	3UTR		1	1
hsa-miR-16-5p	NM_001184906	FBXL20	...((((((((((((((((((.&))))....)))))))).)))))).	6131	6155	1	-20.6	1	0.010262	0.515	0.326485	0.0814112	-6.51454	18	24	8	3UTR	MIRT548276	1	1
hsa-miR-16-5p	NM_001195573	DICER1	((((((((((........((((&))))..)))))))))).	8134	8151	1	-18.2	1	0.000972548	0.662	4.97119	4.56267	-13.2236	14	17	10	3UTR	MIRT051245	1	1
hsa-miR-16-5p	NM_001195677	VAPB	((((((((((((..........&)))))))))))).	1371	1384	1	-20.8	1	0.000264347	0.544	0.663852	1.26429	-7.05204	12	13	12	3UTR		1	1
hsa-miR-16-5p	NM_001195683	TGFBR3	(((((((..(((((((((((((&))))).................))))))))..))))))).	5703	5743	1	-18	1	0.00459133	0.632	1.58911	3.31422	-7.3076	20	40	8	3UTR	MIRT565399	1	1
hsa-miR-16-5p	NM_001198783	POU2F1	...((((((((((.(((((((.&)))))))..)))))))))).	13625	13645	1	-22.9	1	9.33e-05	0.544	-0.0224004	0.600338	-7.37138	17	20	10	3UTR		1	1
hsa-miR-16-5p	NM_001198786	POU2F1	...((((((((((.(((((((.&)))))))..)))))))))).	13272	13292	1	-22.9	1	9.33e-05	0.544	-0.0224004	0.600338	-7.37138	17	20	10	3UTR		1	1
hsa-miR-16-5p	NM_001198999	SEMA6D	((((((((((.((((.......&)))))))))))))).	4427	4442	1	-16.7	1	0.0181315	0.618	3.8936	1.38257	-6.9954	14	15	14	3UTR		1	1
hsa-miR-16-5p	NM_001199745	ARL2	((((((((.(((......(((.&)))))))))))))).	636	651	1	-17.7	1	0.000247578	0.324	2.44067	1.77317	-8.10843	14	15	14	3UTR	MIRT001478	1	1
hsa-miR-16-5p	NM_001204385	VEGFA	((((((((.(.(((((.(((((&)))))...)))))..).)))))))).	1810	1836	1	-21	1	0.177118	0.603	0.491186	0.785654	-7.81874	19	26	8	3UTR	MIRT003890	1	1
hsa-miR-16-5p	NM_001207049	BACE1	.(((((((((......((((((&))))))....))))))))).	3457	3477	1	-19.9	1	0.000329546	0.529	0.329357	0.400335	-13.0794	15	20	9	3UTR	MIRT732050	1	1
hsa-miR-16-5p	NM_001242462	GHR	((((((((.((((.....(((.&)))))))...)))))))).	1652	1671	1	-17.7	1	0.000443278	0.471	1.63748	1.83702	-6.8193	15	19	8	3UTR		1	1
hsa-miR-16-5p	NM_001242829	IP6K1	.(((((((.((((((...(((.&)))....))))))))))))).	4026	4047	1	-22.2	1	0.000165551	0.441	0	0	-5.08276	16	21	13	3UTR		1	1
hsa-miR-16-5p	NM_001243507	ESRRG	....((((((((..(((((((.&))))))))))))))).	3528	3544	1	-19.9	1	0.00220395	0.618	0	0	-11.6925	15	16	15	3UTR		1	1
hsa-miR-16-5p	NM_001243514	ESRRG	....((((((((..(((((((.&))))))))))))))).	3357	3373	1	-19.9	1	0.00220395	0.618	0	0	-11.6925	15	16	15	3UTR		1	1
hsa-miR-16-5p	NM_001244846	CHEK1	(((((((((....(((((.((.&)).))))).))))))))).	2253	2272	1	-19.5	1	0.00156037	0.588	2.81451	1.40789	-12.6408	16	19	9	3UTR	MIRT265077	1	1
hsa-miR-16-5p	NM_001248008	SKIL	(((((((((((((.........&.))))))))))))).	3382	3403	1	-19.6	1	0.00215992	0.588	0.0253658	0.183582	-5.76291	13	15	13	3UTR		1	1
hsa-miR-16-5p	NM_001252090	MRAS	(((((((((.(...........&).))))))))).	2184	2196	1	-16.2	1	1.34e-05	0.382	0	0	-11.6414	10	12	9	3UTR		1	1
hsa-miR-16-5p	NM_001252091	MRAS	(((((((((.(...........&).))))))))).	2491	2503	1	-16.2	1	1.34e-05	0.382	0.831444	-0.399679	-11.6414	10	12	9	3UTR		1	1
hsa-miR-16-5p	NM_001252092	MRAS	(((((((((.(...........&).))))))))).	1996	2008	1	-16.2	1	1.34e-05	0.382	0	0	-11.6414	10	12	9	3UTR		1	1
hsa-miR-16-5p	NM_001252093	MRAS	(((((((((.(...........&).))))))))).	2002	2014	1	-16.2	1	1.34e-05	0.382	0	0	-11.6414	10	12	9	3UTR		1	1
hsa-miR-181a-5p	NM_031501	PCDHA5	....((((..(((.(((((((((&)))))))))))).)))).	2909	2927	0.953846	-20.1	1	0.00352581	0.485	0	0	-12.7023	16	18	12	3UTR	MIRT053675	1	1
hsa-miR-181a-5p	NM_001276320	YOD1	(((((((((((((((.((((((.&)))))).))))))..))))))))).	5327	5352	0.961538	-19.5	1	0.00825619	0.75	4.48679	4.19241	-4.17062	21	25	9	3UTR	MIRT025189	1	1
hsa-miR-181a-5p	NM_001316690	CHD7	.(((((((((((((((.......&.)))))).))))))))).	3577	3609	0.961538	-22	1	0.00583608	0.529	5.63843	4.32762	-3.79332	15	18	9	3UTR		1	1
hsa-miR-181a-5p	NM_138962	MSI2	.((((((((((((((((......&)))))))))..))))))).	1933	1952	0.961538	-21.7	1	0.00327317	0.618	2.76274	4.75975	-3.79332	16	19	9	3UTR		1	1
hsa-miR-181a-5p	NM_194278	MIDEAS	......(((.(((((((((((((&))))))))))))).))).	5022	5040	0.961538	-20.2	0	2.48e-06	0.426	1.63691	3.60672	-16.8091	16	18	13	3UTR	MIRT728138	1	1
hsa-miR-181a-5p	NM_015282	CLASP1	.((((((((.((((((.((((((&))))))....))).))).)))))))).	7114	7141	0.961538	-21.1	1	0.00242871	0.5	4.54821	4.90729	-5.03583	20	27	8	3UTR		1	1
hsa-miR-181a-5p	NM_017780	CHD7	.(((((((((((((((.......&.)))))).))))))))).	10067	10099	0.961538	-22	1	0.00583608	0.529	5.63843	4.32762	-3.79332	15	18	9	3UTR		1	1
hsa-miR-181a-5p	NM_018566	YOD1	(((((((((((((((.((((((.&)))))).))))))..))))))))).	5296	5321	0.961538	-19.5	1	0.00825619	0.75	4.32262	4.82828	-4.17062	21	25	9	3UTR	MIRT025189	1	1
hsa-miR-181a-5p	NM_004438	EPHA4	..((..(((((((((.((((...&)))).)))))))))..)).	3144	3163	0.961538	-19.5	1	0.00161683	0.603	0.765783	1.88479	-11.21	15	19	9	3UTR		1	1
hsa-miR-181a-5p	NM_001322250	MSI2	.((((((((((((((((......&)))))))))..))))))).	1836	1855	0.961538	-21.7	1	0.00327317	0.618	2.76274	4.75975	-3.79332	16	19	9	3UTR		1	1
hsa-miR-181a-5p	NM_001363748	EPHA4	..((..(((((((((.((((...&)))).)))))))))..)).	3173	3192	0.961538	-19.5	1	0.00161683	0.603	1.15015	1.33241	-11.21	15	19	9	3UTR		1	1
hsa-miR-181a-5p	NM_001369460	NFIB	.((((((((.((((.(((((((.&)))))))..))))....)))))))).	4936	4962	0.961538	-22.4	1	0.0124762	0.588	2.60283	4.85261	-5.77128	19	26	8	3UTR		1	1
hsa-miR-181a-5p	NM_001369464	NFIB	.((((((((.((((.(((((((.&)))))))..))))....)))))))).	4900	4926	0.961538	-22.4	1	0.0124762	0.588	1.45675	4.47026	-5.77128	19	26	8	3UTR		1	1
hsa-miR-181a-5p	NM_001369470	NFIB	.((((((((.((((.(((((((.&)))))))..))))....)))))))).	4622	4648	0.961538	-22.4	1	0.0124762	0.588	3.80669	6.39548	-5.77128	19	26	8	3UTR		1	1
hsa-miR-181a-5p	NM_001369476	NFIB	.((((((((.((((.(((((((.&)))))))..))))....)))))))).	4267	4293	0.961538	-22.4	1	0.0124762	0.588	1.62578	4.13532	-5.77128	19	26	8	3UTR		1	1
hsa-miR-181a-5p	NM_001142273	CLASP1	.((((((((.((((((.((((((&))))))....))).))).)))))))).	6937	6964	0.961538	-21.1	1	0.00242871	0.5	4.54821	4.90729	-5.03583	20	27	8	3UTR		1	1
hsa-miR-181a-5p	NM_001142274	CLASP1	.((((((((.((((((.((((((&))))))....))).))).)))))))).	6913	6940	0.961538	-21.1	1	0.00242871	0.5	4.54821	4.90729	-5.03583	20	27	8	3UTR		1	1
hsa-miR-181a-5p	NM_001190737	NFIB	.((((((((.((((.(((((((.&)))))))..))))....)))))))).	5033	5059	0.961538	-22.4	1	0.0124762	0.588	4.20156	4.72933	-5.77128	19	26	8	3UTR		1	1
hsa-miR-181a-5p	NM_001114634	PLAG1	.((((((.(((((.((.(((...&.))).))))))))))))).	4998	5026	0.969231	-18	1	0.00114785	0.544	0.756063	1.04809	-6.9638	16	19	13	3UTR	MIRT000698	1	1
hsa-miR-181a-5p	NM_001114635	PLAG1	.((((((.(((((.((.(((...&.))).))))))))))))).	4639	4667	0.969231	-18	1	0.00114785	0.544	0.699359	0.594455	-6.9638	16	19	13	3UTR	MIRT000698	1	1
hsa-miR-181a-5p	XM_006712385	CLASP1	..((((((((.(((..((((...&))))..))))))))))).	6757	6775	0.974359	-19.3	1	7.44e-07	0.5	0	0	-8.75027	15	18	11	3UTR		1	1
hsa-miR-181a-5p	NM_024881	SLC35E1	.((((((..((((((((((..((&))..)))))))))).)))))).	1690	1712	0.974359	-21	1	5.37e-05	0.397	-0.407654	-0.0852903	-7.16335	18	22	10	3UTR		1	1
hsa-miR-181a-5p	NM_001207051	CLASP1	..((((((((.(((..((((...&))))..))))))))))).	7673	7691	0.974359	-19.3	1	7.44e-07	0.5	0	0	-8.75027	15	18	11	3UTR		1	1
hsa-miR-181a-5p	NM_002019	FLT1	.(((.....(((((((((.((((&))))))))))))).....))).	6046	6068	0.980769	-22.7	1	0.000498909	0.426	2.24379	2.12661	-14.727	16	22	13	3UTR		1	1
hsa-miR-181a-5p	NM_001271684	SLC35A3	.....((((.((((.((((((((&)))))))))))).)))).	6827	6845	1	-21.9	1	1.57e-07	0.456	0.0325355	-0.146025	-15.6436	16	18	12	3UTR		1	1
hsa-miR-181a-5p	NM_001271685	SLC35A3	.....((((.((((.((((((((&)))))))))))).)))).	7041	7059	1	-21.9	1	1.57e-07	0.456	0.0325355	-0.146025	-15.6436	16	18	12	3UTR		1	1
hsa-miR-181a-5p	NM_001278579	ACVR2A	.(((((....(((((((((((((&.)).)))))))))))...))))).	1959	1999	1	-21.7	1	0.000685992	0.515	1.8957	1.20198	-9.94954	18	24	11	3UTR		1	1
hsa-miR-181a-5p	NM_001278580	ACVR2A	.(((((....(((((((((((((&.)).)))))))))))...))))).	1762	1802	1	-21.7	1	0.000685992	0.515	1.8957	1.20198	-9.94954	18	24	11	3UTR		1	1
hsa-miR-181a-5p	NM_001282181	PPP2R5E	...(((((((((((..((.(((.&.))).))..))))))))))).	4328	4372	1	-17.9	1	0.0183046	0.706	3.74331	3.45101	-7.48304	16	21	11	3UTR	MIRT470383	1	1
hsa-miR-181a-5p	NM_001282787	NFIB	.((((((((.((((.(((((((.&)))))))..))))....)))))))).	4076	4102	1	-22.4	1	0.0124762	0.588	1.26607	0.701336	-5.77128	19	26	8	3UTR		1	1
hsa-miR-181a-5p	NM_001282917	RALGAPB	.(((((((.((((.(((((....&.))))).))))..))))))).	7071	7109	1	-22.1	1	0.000608172	0.485	-0.393622	0.24195	-5.70655	16	21	7	3UTR		1	1
hsa-miR-181a-5p	NM_001282918	RALGAPB	.(((((((.((((.(((((....&.))))).))))..))))))).	7204	7242	1	-22.1	1	0.000608172	0.485	-0.393622	0.24195	-5.70655	16	21	7	3UTR		1	1
hsa-miR-181a-5p	NM_001286805	TBC1D14	.(((((((((((((((((.(((.&)))))))))....).)))))))))).	3094	3120	1	-19.1	1	0.00541289	0.485	0.212116	0.0219762	-3.79332	20	26	10	3UTR		1	1
hsa-miR-181a-5p	NM_001289984	JADE2	....(((((((((((((.(((((&))))).))))))))).)))).	5669	5690	1	-21.3	1	0.00608925	0.588	0.799482	1.1554	-9.54656	18	21	9	3UTR		1	1
hsa-miR-181a-5p	NM_001291694	NR2C2	.((((((((.((((.((((((..&)))))).)))).)))))))).	5430	5451	1	-21.7	1	0.0123561	0.559	0.622063	0.162575	-5.77128	18	21	8	3UTR		1	1
hsa-miR-181a-5p	NM_001294343	MTMR12	.(((((((((((((((.((((.(&).)))).)........))))).))))))))).	4434	4466	1	-19.2	1	0.000294743	0.647	3.27507	3.821	-3.79332	20	32	9	3UTR	MIRT025161	1	1
hsa-miR-181a-5p	NM_001294344	MTMR12	.(((((((((((((((.((((.(&).)))).)........))))).))))))))).	4266	4298	1	-19.2	1	0.000294743	0.647	3.27507	3.821	-3.79332	20	32	9	3UTR	MIRT025161	1	1
hsa-miR-181a-5p	NM_001297664	TTC39A	..((((((((..((((((((...&.)))))))).....)))))))).	1930	1982	1	-22.7	1	9.81e-07	0.397	3.46713	4.3522	-11.1286	16	23	8	3UTR		1	1
hsa-miR-181a-5p	NM_001297665	TTC39A	..((((((((..((((((((...&.)))))))).....)))))))).	2022	2074	1	-22.7	1	9.81e-07	0.397	3.85577	4.35026	-11.1286	16	23	8	3UTR		1	1
hsa-miR-181a-5p	NM_001297666	TTC39A	..((((((((..((((((((...&.)))))))).....)))))))).	925	977	1	-22.7	1	9.81e-07	0.397	0.846588	2.55475	-11.1286	16	23	8	3UTR		1	1
hsa-miR-181a-5p	NM_001297776	RIMKLB	..(((((((..(((((((((...&)))))))))..))))))).	3133	3152	1	-18.3	1	0.00275013	0.588	0.789554	1.27154	-9.02428	16	19	9	3UTR		1	1
hsa-miR-181a-5p	NM_001300795	UBE2D3	....((((..((((((((((...&)))).)))))))))).	1826	1842	1	-15.6	1	0.0884342	0.632	2.76184	1.91838	-11.8455	14	16	10	3UTR		1	1
hsa-miR-181a-5p	NM_001300947	CPSF6	.((((((.((((((((.((((..&.)))).)))))))))))))).	3925	3969	1	-22.6	1	0.000582804	0.632	0.489167	0.942875	-6.10696	18	21	14	3UTR		1	1
hsa-miR-181a-5p	NM_001300983	DLG2	...((((....(((((((((((.&)))))))))))....)))).	3463	3483	1	-21.1	1	0.00118081	0.544	0.77016	0.804143	-13.9518	15	20	11	3UTR		1	1
hsa-miR-181a-5p	NM_001303401	CEP97	.(((..((((.(((((.((((((&.))))))))))).))))..))).	5348	5378	1	-21.6	1	0.00179915	0.618	-0.0839699	0.17912	-12.6381	18	23	11	3UTR		1	1
hsa-miR-181a-5p	NM_001304	CPD	.((((((.(((((...(((((..&)))))....))))))))))).	6385	6406	1	-19.2	1	0.0210084	0.618	2.5978	0.929621	-7.9323	16	21	11	3UTR		1	1
hsa-miR-181a-5p	NM_001304481	FGD4	..((((((((.(((.((((((..&)))))).)))))).))))).	3002	3022	1	-21.9	1	0.000452656	0.618	1.25191	0.651944	-8.51722	17	20	6	3UTR		1	1
hsa-miR-181a-5p	NM_001308295	NMT2	(((((((((.((((((((((...&.))))))))))))))))))).	2769	2799	1	-21	1	0.0830781	0.676	0.919135	1.20049	-5.18008	19	21	19	3UTR	MIRT727078	1	1
hsa-miR-181a-5p	NM_001311255	BLOC1S6	..(((((......(((((((((.&))))))))).......))))).	3516	3538	1	-17.3	1	0.0570066	0.721	0.211381	0.372192	-17.0302	14	22	9	3UTR		1	1
hsa-miR-181a-5p	NM_030660	ATXN3	.(((((((((((..((((((.((&.)).))))))..))))).)))))).	3298	3351	1	-21.7	1	0.000740717	0.603	0.0564863	0.321082	-5.9393	19	25	6	3UTR		1	1
hsa-miR-181a-5p	NM_033393	FHDC1	.....((((.((((.((((((((&)))))))))))).)))).	4434	4452	1	-21.8	1	8.47e-06	0.441	-0.0127599	-0.0138532	-15.6436	16	18	12	3UTR		1	1
hsa-miR-181a-5p	NM_033505	SELENOI	.(((((((((((.((.((((...&)))))).))))))).)))).	2621	2641	1	-19.2	1	0.0347259	0.706	1.76931	2.10655	-5.3155	17	20	7	3UTR		1	1
hsa-miR-181a-5p	NM_138318	KCNK10	..((((((.(((((((..((...&))..)))))))..)))))).	6302	6322	1	-19.1	1	0.000821675	0.544	4.29873	5.18844	-6.01339	15	20	7	3UTR		1	1
hsa-miR-181a-5p	NM_138318	KCNK10	.((((.((((((((((.(.((.(&).)).).)))..))))))).)))).	1768	1793	1	-18.8	1	0.00742558	0.588	-0.0481002	0.0146505	-5.69428	18	25	7	3UTR		1	1
hsa-miR-181a-5p	NM_138962	MSI2	..........((((.((((((((&)))))))))))).	5173	5186	1	-18.6	0	0.0470532	0.603	2.2033	2.862	-22.4582	12	13	12	3UTR		1	1
hsa-miR-181a-5p	NM_139241	FGD4	..((((((((.(((.((((((..&)))))).)))))).))))).	3126	3146	1	-21.9	1	0.000452656	0.618	1.25191	0.651944	-8.51722	17	20	6	3UTR		1	1
hsa-miR-181a-5p	NM_144578	MAPK1IP1L	.(((((((..((((((((((((.&))))))))))))..)))........)))).	5513	5543	1	-20	1	0.0183738	0.75	0.739091	1.34793	-6.09222	19	30	12	3UTR	MIRT053685	1	1
hsa-miR-181a-5p	NM_145034	TOR1AIP2	....((((..((((.((((((((&)))))))))))).)))).	6312	6330	1	-19.4	1	0.00099353	0.412	3.70623	2.88908	-12.5809	16	18	12	3UTR		1	1
hsa-miR-181a-5p	NM_152737	RNF182	...(((((..((((((((((...&.))))))))))..))))).	1388	1423	1	-22	1	0.000591052	0.515	-0.0910895	-0.0696656	-8.81344	15	19	10	3UTR		1	1
hsa-miR-181a-5p	NM_152943	ZNF268	..(((((((((((((........&))))))))))))).	9565	9579	1	-18.6	1	7.55e-06	0.485	0.0345648	0.161134	-5.19005	13	14	13	3UTR	MIRT184927	1	1
hsa-miR-181a-5p	NM_153688	ZFP1	(((.((((((((((((..((...&.))...))))))))))))))).	1983	2020	1	-19.8	1	0.021755	0.559	0.092504	-0.140276	-6.9696	17	22	15	3UTR		1	1
hsa-miR-181a-5p	NM_170665	ATP2A2	..(((((((((((((.((((...&)))))))).))))))))).	7987	8006	1	-20.4	1	7.39e-05	0.706	2.69556	2.484	-5.19005	17	19	9	3UTR		1	1
hsa-miR-181a-5p	NM_175061	JAZF1	(((((((((.((((((((((((.&))))))))))))...........))))))))).	2253	2286	1	-27.4	1	0.00359696	0.574	6.18922	5.05759	-5.18008	21	33	12	3UTR		1	1
hsa-miR-181a-5p	NM_178566	ZDHHC21	..((((((((((((((..(((((&)))))...))))))).)).))))).	1485	1510	1	-18.8	1	0.00526835	0.75	0.285322	0.237517	-4.957	19	25	7	3UTR		1	1
hsa-miR-181a-5p	NM_181888	UBE2D3	....((((..((((((((((...&)))).)))))))))).	1988	2004	1	-15.6	1	0.0884342	0.632	2.18647	2.72588	-11.8455	14	16	10	3UTR		1	1
hsa-miR-181a-5p	NM_181892	UBE2D3	....((((..((((((((((...&)))).)))))))))).	2046	2062	1	-15.6	1	0.0884342	0.632	2.5965	3.28058	-11.8455	14	16	10	3UTR		1	1
hsa-miR-181a-5p	NM_183353	RLIM	.....((((.((((.((((((((&)))))))))))).)))).	6569	6587	1	-21.8	1	0.000872701	0.412	1.18535	1.89463	-15.6436	16	18	12	3UTR	MIRT714106	1	1
hsa-miR-181a-5p	NM_198935	SS18L1	.((((((((((((((..(((((.&)))))))))))))).))))).	1644	1665	1	-22	1	0.000178437	0.574	-0.307279	0.0150433	-4.02637	19	21	14	3UTR		1	1
hsa-miR-181a-5p	NM_199039	KLHL5	....((((((.((((((((....&)))))))))))))).	5491	5506	1	-18.1	1	0.000224029	0.603	0.172421	0.229649	-12.3713	14	15	14	3UTR		1	1
hsa-miR-181a-5p	NM_207015	NAALADL2	.(((((((((.((((.(((((..&.)))))..)))).))))))))).	9399	9441	1	-19.9	1	0.0307064	0.676	0.0561233	0.20203	-6.85115	18	23	9	3UTR		1	1
hsa-miR-181a-5p	XM_005251467	NFIB	.((((((((.((((.(((((((.&)))))))..))))....)))))))).	4942	4968	1	-22.4	1	0.0124762	0.588	0	0	-5.77128	19	26	8	3UTR		1	1
hsa-miR-181a-5p	XM_005257014	MSI2	.((((((((((((((((......&)))))))))..))))))).	1865	1884	1	-21.7	1	0.00327317	0.618	0	0	-3.79332	16	19	9	3UTR		1	1
hsa-miR-181a-5p	XM_005268205	MIDEAS	......(((.(((((((((((((&))))))))))))).))).	4282	4300	1	-20.2	0	2.48e-06	0.426	0	0	-16.8091	16	18	13	3UTR	MIRT728138	1	1
hsa-miR-181a-5p	XM_005269005	DRAM1	..((((((..((..(((((((((&)))))))))..)).)))))).	3167	3188	1	-21.8	1	0.0827578	0.662	0	0	-9.40187	17	21	9	3UTR	MIRT231560	1	1
hsa-miR-181a-5p	XM_005273810	DLG2	...((((....(((((((((((.&)))))))))))....)))).	3160	3180	1	-21.1	1	0.00118081	0.544	0	0	-13.9518	15	20	11	3UTR		1	1
hsa-miR-181a-5p	XM_011535500	RNF217	(((((((((..(((((.......&.)))))..))))))))).	7671	7720	1	-17.8	1	0.00854032	0.588	0	0	-8.00486	14	18	9	3UTR		1	1
hsa-miR-181a-5p	XM_011535818	LIN28B	.((((((((.(((.((((((((.&)))))).)).))).)))))))).	4297	4320	1	-19.5	1	0.0395031	0.647	0	0	-5.89267	19	23	8	3UTR		1	1
hsa-miR-181a-5p	XM_017007120	NR2C2	.((((((((.((((.((((((..&)))))).)))).)))))))).	5271	5292	1	-21.7	1	0.0123561	0.559	0	0	-5.77128	18	21	8	3UTR		1	1
hsa-miR-181a-5p	XM_017020848	DCLK1	.((((((((.((((...((((((&)))))).....))))...)))))))).	5840	5867	1	-19.4	1	0.00192142	0.706	0	0	-6.00433	18	27	8	3UTR		1	1
hsa-miR-181a-5p	XM_017027968	RALGAPB	.(((((((.((((.(((((....&.))))).))))..))))))).	6773	6811	1	-22.1	1	0.000608172	0.485	0	0	-5.70655	16	21	7	3UTR		1	1
hsa-miR-181a-5p	XM_017029423	RPS6KA6	.((((((((((((((((((....&.)))))))))))......................))))))).	5609	5663	1	-21.2	1	0.00155797	0.632	0	0	-3.79332	18	42	11	3UTR		1	1
hsa-miR-181a-5p	XM_024446050	MCC	(((.((((((((((((((((((.&))))))))).........)))))..))))))).	6721	6754	1	-20.4	1	0.000708294	0.574	0	0	-6.9696	21	33	9	3UTR		1	1
hsa-miR-181a-5p	NM_015024	XPO7	.(((((((((((((((..((((.&)))).))))))))...))))))).	4352	4376	1	-21.4	1	0.0056474	0.515	1.99487	1.77814	-3.79332	19	24	8	3UTR		1	1
hsa-miR-181a-5p	NM_015288	JADE2	....(((((((((((((.(((((&))))).))))))))).)))).	5503	5524	1	-21.3	1	0.00608925	0.588	0.799482	1.1554	-9.54656	18	21	9	3UTR		1	1
hsa-miR-181a-5p	NM_015990	KLHL5	....((((((.((((((((....&)))))))))))))).	5674	5689	1	-18.1	1	0.000224029	0.603	0.172421	0.229649	-12.3713	14	15	14	3UTR		1	1
hsa-miR-181a-5p	NM_016120	RLIM	.....((((.((((.((((((((&)))))))))))).)))).	6507	6525	1	-21.8	1	0.000872701	0.412	1.8228	2.22347	-15.6436	16	18	12	3UTR	MIRT714106	1	1
hsa-miR-181a-5p	NM_016217	HECA	..((((.((((((((((((....&)))))))))))).)))).	3918	3936	1	-21.3	1	5.12e-05	0.662	0.466551	0.133315	-6.50069	16	18	12	3UTR		1	1
hsa-miR-181a-5p	NM_016598	ZDHHC3	....(((((.((((.((((((((&)))))))))))).))))).	4188	4207	1	-22.6	1	0.000347319	0.5	-0.334897	-0.456647	-11.5245	17	19	12	3UTR		1	1
hsa-miR-181a-5p	NM_017656	ZNF562	...((((...(((((((((((((&)))))))))))))..)))).	4813	4833	1	-23.6	1	0.0132629	0.544	0.352635	0.123706	-11.1271	17	20	13	3UTR	MIRT025146	1	1
hsa-miR-181a-5p	NM_018370	DRAM1	..((((((..((..(((((((((&)))))))))..)).)))))).	3151	3172	1	-21.8	1	0.0827578	0.662	0.0842786	0.116631	-9.40187	17	21	9	3UTR	MIRT231560	1	1
hsa-miR-181a-5p	NM_019842	KCNQ5	.(((((((..((((((((((...&))))))))))........))))))).	5288	5314	1	-21.5	1	0.0045863	0.456	3.55608	1.26936	-6.09222	17	26	10	3UTR		1	1
hsa-miR-181a-5p	NM_020336	RALGAPB	.(((((((.((((.(((((....&.))))).))))..))))))).	7213	7251	1	-22.1	1	0.000608172	0.485	-0.393622	0.24195	-5.70655	16	21	7	3UTR		1	1
hsa-miR-181a-5p	NM_020734	RIMKLB	..(((((((..(((((((((...&)))))))))..))))))).	3963	3982	1	-18.3	1	0.00275013	0.588	0.522491	1.15237	-9.02428	16	19	9	3UTR		1	1
hsa-miR-181a-5p	NM_020773	TBC1D14	.(((((((((((((((((.(((.&)))))))))....).)))))))))).	4023	4049	1	-19.1	1	0.00541289	0.485	0.212116	0.0219762	-3.79332	20	26	10	3UTR		1	1
hsa-miR-181a-5p	NM_020848	JCAD	.........(((((((((((((.&))))))))))))).	7138	7152	1	-22.6	0	0.0277428	0.515	1.96129	3.25647	-20.4803	13	14	13	3UTR	MIRT025102	1	1
hsa-miR-181a-5p	NM_021161	KCNK10	..((((((.(((((((..((...&))..)))))))..)))))).	6622	6642	1	-19.1	1	0.000821675	0.544	4.91584	4.5002	-6.01339	15	20	7	3UTR		1	1
hsa-miR-181a-5p	NM_021627	SENP2	.....((((((((((.((((...&.)))))))))))))).	2522	2566	1	-19.7	1	0.000538134	0.456	-0.128848	-0.105195	-13.8986	14	16	14	3UTR		1	1
hsa-miR-181a-5p	NM_022443	MLF1	((((((((.(((((((.......&)))))).).)))))))).	1796	1814	1	-17.5	1	0.00073992	0.647	0.501623	0.622104	-4.99396	15	18	8	3UTR		1	1
hsa-miR-181a-5p	NM_022658	HOXC8	..........((((((((.((..&)))))))))).	2336	2347	1	-17.1	0	0.00481911	0.559	0.920983	3.27494	-21.7228	10	11	10	3UTR		1	1
hsa-miR-181a-5p	NM_023923	PHACTR4	.((((((((.((((((.(.....&.).))))))...)))))))).	2492	2518	1	-18.8	1	0.00255193	0.529	1.1269	1.00291	-5.03583	15	21	8	3UTR	MIRT437655	1	1
hsa-miR-181a-5p	NM_024548	CEP97	.(((..((((.(((((.((((((&.))))))))))).))))..))).	5525	5555	1	-21.6	1	0.00179915	0.618	-0.0839699	0.17912	-12.6381	18	23	11	3UTR		1	1
hsa-miR-181a-5p	NM_030632	ASXL3	.((((..((.(((((((((((((&))))))))))).)).))..)))).	7346	7370	1	-20.2	1	0.000757424	0.559	0.728316	0.380544	-8.48048	19	24	11	3UTR		1	1
hsa-miR-181a-5p	NM_002271	IPO5	.((((.(((((((((((((....&))))))))))))).)))).	3619	3638	1	-19.3	1	0.109543	0.544	2.27052	2.52384	-5.69428	17	19	13	3UTR	MIRT137301	1	1
hsa-miR-181a-5p	NM_003024	ITSN1	..(((((((((((((.(((.(.(&.).).)))..))))))))))))).	11911	11950	1	-22.2	1	2.7e-05	0.441	-0.354958	-0.237161	-5.19005	18	24	13	3UTR		1	1
hsa-miR-181a-5p	NM_003298	NR2C2	.((((((((.((((.((((((..&)))))).)))).)))))))).	5487	5508	1	-21.7	1	0.0123561	0.559	0.622063	0.162575	-5.77128	18	21	8	3UTR		1	1
hsa-miR-181a-5p	NM_003415	ZNF268	..(((((((((((((........&))))))))))))).	9459	9473	1	-18.6	1	7.55e-06	0.485	0.0345648	0.161134	-5.19005	13	14	13	3UTR	MIRT184927	1	1
hsa-miR-181a-5p	NM_004504	AGFG1	.(((.((((((((((.((.((((&)))).)).)))))...)))))))).	4968	4993	1	-19.9	1	0.000787107	0.647	0.432476	-0.101732	-8.14541	19	25	8	3UTR		1	1
hsa-miR-181a-5p	NM_004808	NMT2	(((((((((.((((((((((...&.))))))))))))))))))).	2726	2756	1	-21	1	0.0830781	0.676	0.766016	0.537296	-5.18008	19	21	19	3UTR	MIRT727078	1	1
hsa-miR-181a-5p	NM_004992	MECP2	.....(((((((((((((((.((&))))))......))))))))))).	2738	2762	1	-21.4	1	0.0300175	0.559	-0.149901	0.0886912	-13.6656	17	24	11	3UTR		1	1
hsa-miR-181a-5p	NM_004992	MECP2	....((((((((((((((((((.&)))))))))).))........)))))).	1860	1888	1	-21.3	1	0.000446783	0.515	1.06187	2.04374	-9.54656	18	28	10	3UTR		1	1
hsa-miR-181a-5p	NM_005036	PPARA	.((((((...((((((((.((((&))))...)))))))))))))).	4839	4861	1	-21.2	1	0.00121821	0.456	-0.626515	-0.565574	-8.40586	18	22	14	3UTR		1	1
hsa-miR-181a-5p	NM_005065	SEL1L	(((.(((..((((((((.(((..&))).))))))))..))).))).	2516	2538	1	-21	1	0.0099287	0.529	0.27101	0.503384	-10.3396	17	22	8	3UTR		1	1
hsa-miR-181a-5p	NM_005238	ETS1	..(((((((((((.((..(((((&.))))))).))))))))))).	3747	3790	1	-21.9	1	0.000291693	0.603	0	0	-5.81384	18	21	11	3UTR	MIRT613091	1	1
hsa-miR-181a-5p	NM_005436	CCDC6	.((((((...(((((((((((((&)))))))))))))...............)))))).	2326	2361	1	-19.1	1	0.0136708	0.574	0.500006	0.55684	-8.40586	19	35	13	3UTR	MIRT025091	1	1
hsa-miR-181a-5p	NM_007007	CPSF6	.((((((.((((((((.((((..&.)))).)))))))))))))).	3814	3858	1	-22.6	1	0.000582804	0.632	0.489167	0.942875	-6.10696	18	21	14	3UTR		1	1
hsa-miR-181a-5p	NM_007036	ESM1	.(((((((((.((((.(((.((.&)).))).)))).))..))))))).	1976	2000	1	-18.2	1	0.022102	0.588	2.48269	2.01991	-6.85115	18	24	7	3UTR		1	1
hsa-miR-181a-5p	NM_007207	DUSP10	..((((((..(((((((((....&))))))))))))))).	2310	2326	1	-20.1	1	0.00163963	0.603	1.8275	4.3828	-7.2559	15	16	15	3UTR		1	1
hsa-miR-181a-5p	NM_012243	SLC35A3	.....((((.((((.((((((((&)))))))))))).)))).	7080	7098	1	-21.9	1	1.57e-07	0.456	0.0325355	-0.146025	-15.6436	16	18	12	3UTR		1	1
hsa-miR-181a-5p	NM_012388	BLOC1S6	..(((((......(((((((((.&))))))))).......))))).	3426	3448	1	-17.3	1	0.0570066	0.721	0.211381	0.372192	-17.0302	14	22	9	3UTR		1	1
hsa-miR-181a-5p	NM_012406	PRDM4	..(((..((((((((((((((..&))))))))))))))..))).	3257	3277	1	-19.5	1	0.00397396	0.559	3.69837	3.30991	-8.40165	17	20	14	3UTR		1	1
hsa-miR-181a-5p	NM_001318469	ZFP1	(((.((((((((((((..((...&.))...))))))))))))))).	2002	2039	1	-19.8	1	0.021755	0.559	0	0	-6.9696	17	22	15	3UTR		1	1
hsa-miR-181a-5p	NM_001318472	ZFP1	(((.((((((((((((..((...&.))...))))))))))))))).	1925	1962	1	-19.8	1	0.021755	0.559	0	0	-6.9696	17	22	15	3UTR		1	1
hsa-miR-181a-5p	NM_001318475	ZFP1	(((.((((((((((((..((...&.))...))))))))))))))).	2097	2134	1	-19.8	1	0.021755	0.559	0	0	-6.9696	17	22	15	3UTR		1	1
hsa-miR-181a-5p	NM_001318476	ZFP1	(((.((((((((((((..((...&.))...))))))))))))))).	2000	2037	1	-19.8	1	0.021755	0.559	0	0	-6.9696	17	22	15	3UTR		1	1
hsa-miR-181a-5p	NM_001322250	MSI2	..........((((.((((((((&)))))))))))).	5076	5089	1	-18.6	0	0.0470532	0.603	2.2033	2.862	-22.4582	12	13	12	3UTR		1	1
hsa-miR-181a-5p	NM_001328100	ESR1	.(((((((((.(((..((((((.&.))))))..))).))))))))).	4657	4688	1	-21.1	1	6.59e-08	0.426	0.0250123	0.360261	-7.5866	18	23	9	3UTR		1	1
hsa-miR-181a-5p	NM_001330451	ETS1	.(((((((((((((((((((...&))))))))........)))).))))))).	3579	3608	1	-20.3	1	0.0585099	0.544	1.24099	2.5802	-3.79332	19	29	8	3UTR	MIRT613091	1	1
hsa-miR-181a-5p	NM_001330638	TBC1D14	.(((((((((((((((((.(((.&)))))))))....).)))))))))).	3331	3357	1	-19.1	1	0.00541289	0.485	0.212116	0.0219762	-3.79332	20	26	10	3UTR		1	1
hsa-miR-181a-5p	NM_001331010	ITSN1	..(((((((((((((.(((.(.(&.).).)))..))))))))))))).	11896	11935	1	-22.2	1	2.7e-05	0.441	-0.354958	-0.237161	-5.19005	18	24	13	3UTR		1	1
hsa-miR-181a-5p	NM_001349337	FOXP1	...(((((.((((((((.((...&)).)))))))).))))).	3235	3253	1	-20.9	1	1.51e-05	0.426	0.192535	1.14954	-7.57093	15	18	8	3UTR		1	1
hsa-miR-181a-5p	NM_001349338	FOXP1	...(((((.((((((((.((...&)).)))))))).))))).	3933	3951	1	-20.9	1	1.51e-05	0.426	2.50854	3.5597	-7.57093	15	18	8	3UTR		1	1
hsa-miR-181a-5p	NM_001357857	ATXN1	(((.((((((((((((((((...&.))))))........))))))))))))).	2831	2874	1	-23.9	1	0.0162155	0.485	0.83904	2.24154	-6.9696	19	29	13	3UTR		1	1
hsa-miR-181a-5p	NM_001357857	ATXN1	((((..((((((((((.(((...&))).)))))))))))))).	8281	8300	1	-22.1	1	0.000390463	0.529	3.62229	3.28729	-9.95757	17	19	14	3UTR		1	1
hsa-miR-181a-5p	NM_001369467	NFIB	.((((((((.((((.(((((((.&)))))))..))))....)))))))).	4356	4382	1	-22.4	1	0.0124762	0.588	3.58017	3.47585	-5.77128	19	26	8	3UTR		1	1
hsa-miR-181a-5p	NM_001369479	NFIB	.((((((((.((((.(((((((.&)))))))..))))....)))))))).	3787	3813	1	-22.4	1	0.0124762	0.588	1.75767	0.909965	-5.77128	19	26	8	3UTR		1	1
hsa-miR-181a-5p	NM_001369781	MLF1	((((((((.(((((((.......&)))))).).)))))))).	1692	1710	1	-17.5	1	0.00073992	0.647	0.501623	0.622104	-4.99396	15	18	8	3UTR		1	1
hsa-miR-181a-5p	NM_001369782	MLF1	((((((((.(((((((.......&)))))).).)))))))).	1648	1666	1	-17.5	1	0.00073992	0.647	0.501623	0.622104	-4.99396	15	18	8	3UTR		1	1
hsa-miR-181a-5p	NM_001369783	MLF1	((((((((.(((((((.......&)))))).).)))))))).	1841	1859	1	-17.5	1	0.00073992	0.647	0.501623	0.622104	-4.99396	15	18	8	3UTR		1	1
hsa-miR-181a-5p	NM_001369785	MLF1	((((((((.(((((((.......&)))))).).)))))))).	1885	1903	1	-17.5	1	0.00073992	0.647	0.501623	0.622104	-4.99396	15	18	8	3UTR		1	1
hsa-miR-181a-5p	NM_001370298	FGD4	..((((((((.(((.((((((..&)))))).)))))).))))).	3232	3252	1	-21.9	1	0.000452656	0.618	1.25191	0.651944	-8.51722	17	20	6	3UTR		1	1
hsa-miR-181a-5p	NM_001370548	FOXP1	...(((((.((((((((.((...&)).)))))))).))))).	3235	3253	1	-20.9	1	1.51e-05	0.426	0.192535	1.14954	-7.57093	15	18	8	3UTR		1	1
hsa-miR-181a-5p	NM_001377968	DLG2	...((((....(((((((((((.&)))))))))))....)))).	3505	3525	1	-21.1	1	0.00118081	0.544	1.295	0.580219	-13.9518	15	20	11	3UTR		1	1
hsa-miR-181a-5p	NM_001377972	DLG2	...((((....(((((((((((.&)))))))))))....)))).	3086	3106	1	-21.1	1	0.00118081	0.544	3.04446	1.79931	-13.9518	15	20	11	3UTR		1	1
hsa-miR-181a-5p	NM_001377979	DLG2	...((((....(((((((((((.&)))))))))))....)))).	1823	1843	1	-21.1	1	0.00118081	0.544	0.735835	0.893039	-13.9518	15	20	11	3UTR		1	1
hsa-miR-181a-5p	NM_001378847	MLF1	((((((((.(((((((.......&)))))).).)))))))).	2187	2205	1	-17.5	1	0.00073992	0.647	0.501623	0.622104	-4.99396	15	18	8	3UTR		1	1
hsa-miR-181a-5p	NM_001378848	MLF1	((((((((.(((((((.......&)))))).).)))))))).	2042	2060	1	-17.5	1	0.00073992	0.647	0.501623	0.622104	-4.99396	15	18	8	3UTR		1	1
hsa-miR-181a-5p	NM_001378851	MLF1	((((((((.(((((((.......&)))))).).)))))))).	1712	1730	1	-17.5	1	0.00073992	0.647	0.501623	0.622104	-4.99396	15	18	8	3UTR		1	1
hsa-miR-181a-5p	NM_001378852	MLF1	((((((((.(((((((.......&)))))).).)))))))).	1663	1681	1	-17.5	1	0.00073992	0.647	0.501623	0.622104	-4.99396	15	18	8	3UTR		1	1
hsa-miR-181a-5p	NM_001385118	FGD4	..((((((((.(((.((((((..&)))))).)))))).))))).	3007	3027	1	-21.9	1	0.000452656	0.618	1.25191	0.651944	-8.51722	17	20	6	3UTR		1	1
hsa-miR-181a-5p	NM_001385550	CAPRIN2	.((((((...(((((((((....&))))))))))))))).	2959	2975	1	-18.4	1	9.2e-07	0.603	2.9695	2.94791	-8.40586	15	16	15	3UTR	MIRT480026	1	1
hsa-miR-181a-5p	NM_001616	ACVR2A	.(((((....(((((((((((((&.)).)))))))))))...))))).	1814	1854	1	-21.7	1	0.000685992	0.515	1.8957	1.20198	-9.94954	18	24	11	3UTR		1	1
hsa-miR-181a-5p	NM_001681	ATP2A2	..(((((((((((((.((((...&)))))))).))))))))).	4017	4036	1	-20.4	1	7.39e-05	0.706	2.69556	2.484	-5.19005	17	19	9	3UTR		1	1
hsa-miR-181a-5p	NM_000097	CPOX	..((((((.(((((.((((....&)))).))))).)))))).	1627	1645	1	-19.8	1	0.00199499	0.603	3.77473	4.39157	-6.74884	15	18	6	3UTR	MIRT727945	1	1
hsa-miR-181a-5p	NM_001037165	FOXK1	....(((((((((((.(((((..&)))))..))))))))))).	3495	3514	1	-24	1	0.00483383	0.456	-0.452441	-0.482381	-9.77961	16	19	11	3UTR		1	1
hsa-miR-181a-5p	NM_001037165	FOXK1	...((((((.((((((((((...&))))).))))))))))).	7673	7691	1	-19.9	1	0.0108536	0.456	-0.556681	-0.724849	-7.75705	16	18	11	3UTR		1	1
hsa-miR-181a-5p	NM_001040446	MTMR12	.(((((((((((((((.((((.(&).)))).)........))))).))))))))).	4596	4628	1	-19.2	1	0.000294743	0.647	3.27507	3.821	-3.79332	20	32	9	3UTR	MIRT025161	1	1
hsa-miR-181a-5p	NM_001043318	MIDEAS	......(((.(((((((((((((&))))))))))))).))).	4593	4611	1	-20.2	0	2.48e-06	0.426	3.79609	2.32131	-16.8091	16	18	13	3UTR	MIRT728138	1	1
hsa-miR-181a-5p	NM_001048183	PHACTR4	.((((((((.((((((.(.....&.).))))))...)))))))).	2351	2377	1	-18.8	1	0.00255193	0.529	1.1269	1.00291	-5.03583	15	21	8	3UTR	MIRT437655	1	1
hsa-miR-181a-5p	NM_001080494	TTC39A	..((((((((..((((((((...&.)))))))).....)))))))).	1917	1969	1	-22.7	1	9.81e-07	0.397	4.95555	3.91253	-11.1286	16	23	8	3UTR		1	1
hsa-miR-181a-5p	NM_001098638	RNF169	...((((..(((((((((((...&)))))))))))..)))).	2953	2971	1	-19	1	0.00122717	0.515	-0.302836	0.0571603	-9.88456	15	18	11	3UTR		1	1
hsa-miR-181a-5p	NM_001113363	TBC1D14	.(((((((((((((((((.(((.&)))))))))....).)))))))))).	3178	3204	1	-19.1	1	0.00541289	0.485	0.212116	0.0219762	-3.79332	20	26	10	3UTR		1	1
hsa-miR-181a-5p	NM_001127696	ATXN3	.(((((((((((..((((((.((&.)).))))))..))))).)))))).	3418	3471	1	-21.7	1	0.000740717	0.603	0.211978	0.187359	-5.9393	19	25	6	3UTR		1	1
hsa-miR-181a-5p	NM_001127697	ATXN3	.(((((((((((..((((((.((&.)).))))))..))))).)))))).	3310	3363	1	-21.7	1	0.000740717	0.603	0.154965	0.335076	-5.9393	19	25	6	3UTR		1	1
hsa-miR-181a-5p	NM_001130031	ZNF562	...((((...(((((((((((((&)))))))))))))..)))).	5029	5049	1	-23.6	1	0.0132629	0.544	-0.0160229	-0.00987901	-11.1271	17	20	13	3UTR	MIRT025146	1	1
hsa-miR-181a-5p	NM_001130156	MLF1	((((((((.(((((((.......&)))))).).)))))))).	1840	1858	1	-17.5	1	0.00073992	0.647	0.501623	0.622104	-4.99396	15	18	8	3UTR		1	1
hsa-miR-181a-5p	NM_001130157	MLF1	((((((((.(((((((.......&)))))).).)))))))).	1913	1931	1	-17.5	1	0.00073992	0.647	0.501623	0.622104	-4.99396	15	18	8	3UTR		1	1
hsa-miR-181a-5p	NM_001135179	ZDHHC3	....(((((.((((.((((((((&)))))))))))).))))).	4104	4123	1	-22.6	1	0.000347319	0.5	0	0	-11.5245	17	19	12	3UTR		1	1
hsa-miR-181a-5p	NM_001135187	AGFG1	.(((.((((((((((.((.((((&)))).)).)))))...)))))))).	5034	5059	1	-19.9	1	0.000787107	0.647	0	0	-8.14541	19	25	8	3UTR		1	1
hsa-miR-181a-5p	NM_001135188	AGFG1	.(((.((((((((((.((.((((&)))).)).)))))...)))))))).	4962	4987	1	-19.9	1	0.000787107	0.647	0	0	-8.14541	19	25	8	3UTR		1	1
hsa-miR-181a-5p	NM_001135189	AGFG1	.(((.((((((((((.((.((((&)))).)).)))))...)))))))).	4848	4873	1	-19.9	1	0.000787107	0.647	0.432476	-0.101732	-8.14541	19	25	8	3UTR		1	1
hsa-miR-181a-5p	NM_001135604	ESM1	.(((((((((.((((.(((.((.&)).))).)))).))..))))))).	1826	1850	1	-18.2	1	0.022102	0.588	2.48269	2.01991	-6.85115	18	24	7	3UTR		1	1
hsa-miR-181a-5p	NM_001139466	TBL1X	..((((((...(((((((((...&)))))))))...)))))).	3628	3647	1	-21	1	0.00253367	0.559	0	0	-10.0807	15	19	9	3UTR		1	1
hsa-miR-181a-5p	NM_001139467	TBL1X	..((((((...(((((((((...&)))))))))...)))))).	3483	3502	1	-21	1	0.00253367	0.559	0	0	-10.0807	15	19	9	3UTR		1	1
hsa-miR-181a-5p	NM_001139468	TBL1X	..((((((...(((((((((...&)))))))))...)))))).	3618	3637	1	-21	1	0.00253367	0.559	0	0	-10.0807	15	19	9	3UTR		1	1
hsa-miR-181a-5p	NM_001142700	DLG2	...((((....(((((((((((.&)))))))))))....)))).	2876	2896	1	-21.1	1	0.00118081	0.544	1.04604	1.06933	-13.9518	15	20	11	3UTR		1	1
hsa-miR-181a-5p	NM_001142702	DLG2	...((((....(((((((((((.&)))))))))))....)))).	1781	1801	1	-21.1	1	0.00118081	0.544	1.46514	0.566546	-13.9518	15	20	11	3UTR		1	1
hsa-miR-181a-5p	NM_001143887	COPS2	((((((((..((((((.(((...&.))).))))))....)))))))).	2283	2313	1	-19.5	1	0.00791865	0.618	0.189249	-0.206192	-6.23647	17	24	8	3UTR	MIRT025181	1	1
hsa-miR-181a-5p	NM_001144832	TTC39A	..((((((((..((((((((...&.)))))))).....)))))))).	1892	1944	1	-22.7	1	9.81e-07	0.397	5.14532	3.34293	-11.1286	16	23	8	3UTR		1	1
hsa-miR-181a-5p	NM_001160130	KCNQ5	.(((((((..((((((((((...&))))))))))........))))))).	5261	5287	1	-21.5	1	0.0045863	0.456	3.55608	1.26936	-6.09222	17	26	10	3UTR		1	1
hsa-miR-181a-5p	NM_001160132	KCNQ5	.(((((((..((((((((((...&))))))))))........))))))).	5318	5344	1	-21.5	1	0.0045863	0.456	3.55608	1.26936	-6.09222	17	26	10	3UTR		1	1
hsa-miR-181a-5p	NM_001160133	KCNQ5	.(((((((..((((((((((...&))))))))))........))))))).	5345	5371	1	-21.5	1	0.0045863	0.456	3.55608	1.26936	-6.09222	17	26	10	3UTR		1	1
hsa-miR-181a-5p	NM_001160134	KCNQ5	.(((((((..((((((((((...&))))))))))........))))))).	4958	4984	1	-21.5	1	0.0045863	0.456	3.55608	1.26936	-6.09222	17	26	10	3UTR		1	1
hsa-miR-181a-5p	NM_001162422	ETS1	..(((((((((((.((..(((((&.))))))).))))))))))).	3099	3142	1	-21.9	1	0.000291693	0.603	0.447069	0.783309	-5.81384	18	21	11	3UTR	MIRT613091	1	1
hsa-miR-181a-5p	NM_001162422	ETS1	.(((((((((((((((((((...&))))))))........)))).))))))).	3192	3221	1	-20.3	1	0.0585099	0.544	0.484007	0.567191	-3.79332	19	29	8	3UTR	MIRT613091	1	1
hsa-miR-181a-5p	NM_001164779	ATXN3	.(((((((((((..((((((.((&.)).))))))..))))).)))))).	3100	3153	1	-21.7	1	0.000740717	0.603	-0.0730903	0.533329	-5.9393	19	25	6	3UTR		1	1
hsa-miR-181a-5p	NM_001164780	ATXN3	.(((((((((((..((((((.((&.)).))))))..))))).)))))).	3167	3220	1	-21.7	1	0.000740717	0.603	0.274175	0.27288	-5.9393	19	25	6	3UTR		1	1
hsa-miR-181a-5p	NM_001164781	ATXN3	.(((((((((((..((((((.((&.)).))))))..))))).)))))).	3253	3306	1	-21.7	1	0.000740717	0.603	0.0409367	0.210683	-5.9393	19	25	6	3UTR		1	1
hsa-miR-181a-5p	NM_001165032	RNF182	...(((((..((((((((((...&.))))))))))..))))).	1471	1506	1	-22	1	0.000591052	0.515	0.323107	0.139218	-8.81344	15	19	10	3UTR		1	1
hsa-miR-181a-5p	NM_001165034	RNF182	...(((((..((((((((((...&.))))))))))..))))).	1443	1478	1	-22	1	0.000591052	0.515	-0.0910895	-0.0696656	-8.81344	15	19	10	3UTR		1	1
hsa-miR-181a-5p	NM_001165881	ZNF268	..(((((((((((((........&))))))))))))).	9400	9414	1	-18.6	1	7.55e-06	0.485	0.0345648	0.161134	-5.19005	13	14	13	3UTR	MIRT184927	1	1
hsa-miR-181a-5p	NM_001165883	ZNF268	..(((((((((((((........&))))))))))))).	9236	9250	1	-18.6	1	7.55e-06	0.485	0.0345648	0.161134	-5.19005	13	14	13	3UTR	MIRT184927	1	1
hsa-miR-181a-5p	NM_001165884	ZNF268	..(((((((((((((........&))))))))))))).	9035	9049	1	-18.6	1	7.55e-06	0.485	0.0345648	0.161134	-5.19005	13	14	13	3UTR	MIRT184927	1	1
hsa-miR-181a-5p	NM_001165885	ZNF268	..(((((((((((((........&))))))))))))).	9332	9346	1	-18.6	1	7.55e-06	0.485	0.0345648	0.161134	-5.19005	13	14	13	3UTR	MIRT184927	1	1
hsa-miR-181a-5p	NM_001165886	ZNF268	..(((((((((((((........&))))))))))))).	9131	9145	1	-18.6	1	7.55e-06	0.485	0.0345648	0.161134	-5.19005	13	14	13	3UTR	MIRT184927	1	1
hsa-miR-181a-5p	NM_001165887	ZNF268	..(((((((((((((........&))))))))))))).	9364	9378	1	-18.6	1	7.55e-06	0.485	0.0345648	0.161134	-5.19005	13	14	13	3UTR	MIRT184927	1	1
hsa-miR-181a-5p	NM_001168342	TTC39B	...(((((((((((((.(((((.&)))))))))))).)))))).	8246	8266	1	-18.8	1	0.00398766	0.603	1.22572	0.79615	-6.51454	18	20	12	3UTR		1	1
hsa-miR-181a-5p	NM_001195432	MLF1	((((((((.(((((((.......&)))))).).)))))))).	2115	2133	1	-17.5	1	0.00073992	0.647	0.501623	0.622104	-4.99396	15	18	8	3UTR		1	1
hsa-miR-181a-5p	NM_001195433	MLF1	((((((((.(((((((.......&)))))).).)))))))).	1784	1802	1	-17.5	1	0.00073992	0.647	0.501623	0.622104	-4.99396	15	18	8	3UTR		1	1
hsa-miR-181a-5p	NM_001195434	MLF1	((((((((.(((((((.......&)))))).).)))))))).	1958	1976	1	-17.5	1	0.00073992	0.647	0.501623	0.622104	-4.99396	15	18	8	3UTR		1	1
hsa-miR-181a-5p	NM_001199260	TOR1AIP2	....((((..((((.((((((((&)))))))))))).)))).	6731	6749	1	-19.4	1	0.00099353	0.412	1.73326	2.04251	-12.5809	16	18	12	3UTR		1	1
hsa-miR-181a-5p	NM_001199775	CPD	.((((((.(((((...(((((..&)))))....))))))))))).	5750	5771	1	-19.2	1	0.0210084	0.618	2.5978	0.929621	-7.9323	16	21	11	3UTR		1	1
hsa-miR-181a-5p	NM_001206769	DLG2	...((((....(((((((((((.&)))))))))))....)))).	3523	3543	1	-21.1	1	0.00118081	0.544	0	0	-13.9518	15	20	11	3UTR		1	1
hsa-miR-181a-5p	NM_001244810	FOXP1	...(((((.((((((((.((...&)).)))))))).))))).	3892	3910	1	-20.9	1	1.51e-05	0.426	5.94887	2.9796	-7.57093	15	18	8	3UTR		1	1
hsa-miR-181a-5p	NM_001244812	FOXP1	...(((((.((((((((.((...&)).)))))))).))))).	3266	3284	1	-20.9	1	1.51e-05	0.426	0.97511	0.590964	-7.57093	15	18	8	3UTR		1	1
hsa-miR-185-5p	NM_001260497	KCNC2	.((((((((..((..((((((.&))))))..))..)))))))).	3726	3747	0.955128	-23.4	1	0.000550179	0.618	4.75381	2.36356	-9.4529	16	21	8	3UTR		1	1
hsa-miR-185-5p	NM_001276718	PAK6	.(((((((..((((((((((((&.))))))..))))))..))))))).	3583	3627	0.961538	-31.2	1	0.0283883	0.412	0.61201	0.196208	-6.09222	19	25	7	3UTR		1	1
hsa-miR-185-5p	NM_001300889	TRIM67	(((((.(..(((((((((((..&.)))))))))))..)))))).	6970	7015	0.961538	-30.4	1	5.41e-05	0.471	-0.11465	-0.0127945	-9.20856	17	21	11	3UTR		1	1
hsa-miR-185-5p	NM_001306219	TCF12	((((((((.((((((((.((((&)))).))))))))...)))))))).	1982	2007	0.961538	-27.7	1	0.000285153	0.485	6.76625	4.85944	-4.99396	20	25	8	3UTR		1	1
hsa-miR-185-5p	NM_001306220	TCF12	((((((((.((((((((.((((&)))).))))))))...)))))))).	1770	1795	0.961538	-27.7	1	0.000285153	0.485	6.76625	4.85944	-4.99396	20	25	8	3UTR		1	1
hsa-miR-185-5p	NM_207036	TCF12	((((((((.((((((((.((((&)))).))))))))...)))))))).	2675	2700	0.961538	-27.7	1	0.000285153	0.485	6.76625	4.85944	-4.99396	20	25	8	3UTR		1	1
hsa-miR-185-5p	NM_207037	TCF12	((((((((.((((((((.((((&)))).))))))))...)))))))).	2685	2710	0.961538	-27.7	1	0.000285153	0.485	6.76625	4.85944	-4.99396	20	25	8	3UTR		1	1
hsa-miR-185-5p	NM_207038	TCF12	((((((((.((((((((.((((&)))).))))))))...)))))))).	2603	2628	0.961538	-27.7	1	0.000285153	0.485	6.76625	4.85944	-4.99396	20	25	8	3UTR		1	1
hsa-miR-185-5p	NM_207040	TCF12	((((((((.((((((((.((((&)))).))))))))...)))))))).	1910	1935	0.961538	-27.7	1	0.000285153	0.485	6.76625	4.85944	-4.99396	20	25	8	3UTR		1	1
hsa-miR-185-5p	NM_016287	HP1BP3	((((((((((((.((.......&)))))))))))))).	3391	3406	0.961538	-18.6	1	0.314937	0.603	4.70286	3.49024	-5.45975	14	15	14	3UTR		1	1
hsa-miR-185-5p	NM_020168	PAK6	.(((((((..((((((((((((&.))))))..))))))..))))))).	3277	3321	0.961538	-31.2	1	0.0283883	0.412	0.61201	0.196208	-6.09222	19	25	7	3UTR		1	1
hsa-miR-185-5p	NM_024689	DIPK2B	....((...(((((((((((..&)))))))))))...)).	2333	2350	0.961538	-21.5	0	1.79e-05	0.485	0.447338	1.64136	-14.4603	13	17	11	3UTR		1	1
hsa-miR-185-5p	NM_003205	TCF12	((((((((.((((((((.((((&)))).))))))))...)))))))).	2613	2638	0.961538	-27.7	1	0.000285153	0.485	6.76625	4.85944	-4.99396	20	25	8	3UTR		1	1
hsa-miR-185-5p	NM_005911	MAT2A	((((..((((((((.((.(((.&))).)).))))))))....)))).	2709	2733	0.961538	-19.4	1	0.00059867	0.588	4.11455	3.29558	-10.693	17	24	8	3UTR		1	1
hsa-miR-185-5p	NM_006449	CDC42EP3	.((((((((((.((.(.((...&)).).)).)))))))))).	3758	3777	0.961538	-22	1	0.000301021	0.441	2.03874	1.29957	-7.87558	15	19	10	3UTR		1	1
hsa-miR-185-5p	NM_001004342	TRIM67	(((((.(..(((((((((((..&.)))))))))))..)))))).	7156	7201	0.961538	-30.4	1	5.41e-05	0.471	-0.11465	-0.0127945	-9.20856	17	21	11	3UTR		1	1
hsa-miR-185-5p	NM_001135947	URM1	((((((((((((..(((((((.&)))))..))..))).))).)))))).	682	708	0.961538	-21.2	1	0.00366368	0.368	3.91868	2.37096	-6.08354	19	26	6	3UTR		1	1
hsa-miR-185-5p	NM_001206541	CAPZB	..((.(((((((((...((((.&))))))))))))).)).	1933	1950	0.974359	-19.8	1	0.0352412	0.515	0	0	-10.0445	15	17	13	3UTR	MIRT688816	1	1
hsa-miR-185-5p	XM_011544192	TRIM67	(((((.(..(((((((((((..&.)))))))))))..)))))).	7687	7732	0.980769	-30.4	1	5.41e-05	0.471	0	0	-9.20856	17	21	11	3UTR		1	1
hsa-miR-185-5p	NM_016376	ANKFY1	(((((((((.(((((.......&)))))...))))))))).	6406	6424	0.984615	-22.4	1	0.0182424	0.471	3.95556	3.93308	-5.41313	14	18	9	3UTR		1	1
hsa-miR-185-5p	NM_001330063	ANKFY1	(((((((((.(((((.......&)))))...))))))))).	6403	6421	0.984615	-22.4	1	0.0182424	0.471	3.95556	3.93308	-5.41313	14	18	9	3UTR		1	1
hsa-miR-185-5p	NM_001252624	SLC8A1	.((((((((((((((((((((.&))))))).)))......)))))))))).	3647	3675	1	-24.2	1	0.187748	0.559	-0.187484	-0.102133	-3.79332	20	28	10	3UTR	MIRT735112	1	1
hsa-miR-185-5p	NM_001252624	SLC8A1	((((((((...((((.((((..&.))))))))..)))))))).	3146	3175	1	-24	1	0.0047359	0.559	0.0793088	-0.0090858	-9.29429	16	20	8	3UTR	MIRT735112	1	1
hsa-miR-185-5p	NM_001256702	USP3	..((((((.(((((((.((((.&)))).....))))))).)))))).	2122	2146	1	-22.8	1	0.000887657	0.603	0.174389	0.417435	-6.01339	17	24	7	3UTR		1	1
hsa-miR-185-5p	NM_001256732	SSBP2	(((..(((((((((((((((((&))))))))...................)))))).)))..))).	2561	2604	1	-21.1	1	0.00134565	0.632	0.101018	0.0929451	-11.0886	20	43	8	3UTR		1	1
hsa-miR-185-5p	NM_001257135	LIF	.((((((.(((((((((((((.&))))))))))))))))..))).	2721	2743	1	-30.1	1	0.0383192	0.397	0.28976	0.0135241	-6.10696	19	22	16	3UTR		1	1
hsa-miR-185-5p	NM_001270436	CDC42EP3	.((((((((((.((.(.((...&)).).)).)))))))))).	3644	3663	1	-22	1	0.000301021	0.441	0.679977	0.374255	-7.87558	15	19	10	3UTR		1	1
hsa-miR-185-5p	NM_001270438	CDC42EP3	.((((((((((.((.(.((...&)).).)).)))))))))).	3676	3695	1	-22	1	0.000301021	0.441	0.669106	0.934064	-7.87558	15	19	10	3UTR		1	1
hsa-miR-185-5p	NM_001270942	KLF7	(.(((((.(((((((((((...&)))))))).)))..))))).).	3589	3611	1	-24.8	1	0.00553333	0.603	1.29153	1.1971	-7.41489	17	22	8	3UTR		1	1
hsa-miR-185-5p	NM_001270942	KLF7	(((((....(((((((((....&)))))))))....))))).	5570	5589	1	-21.3	1	5.05e-05	0.559	1.27902	1.05312	-10.7522	14	19	9	3UTR		1	1
hsa-miR-185-5p	NM_001270943	KLF7	(.(((((.(((((((((((...&)))))))).)))..))))).).	3558	3580	1	-24.8	1	0.00553333	0.603	1.88514	1.07745	-7.41489	17	22	8	3UTR		1	1
hsa-miR-185-5p	NM_001270943	KLF7	(((((....(((((((((....&)))))))))....))))).	5539	5558	1	-21.3	1	5.05e-05	0.559	2.17875	0.947547	-10.7522	14	19	9	3UTR		1	1
hsa-miR-185-5p	NM_001270944	KLF7	(((((....(((((((((....&)))))))))....))))).	5503	5522	1	-21.3	1	5.05e-05	0.559	0.621152	1.5614	-10.7522	14	19	9	3UTR		1	1
hsa-miR-185-5p	NM_001276718	PAK6	(((((((((((((((.(((((.&))))).)))))).................))))))))).	2917	2956	1	-28	1	0.0816097	0.456	1.31955	0.651835	-4.17062	20	39	9	3UTR		1	1
hsa-miR-185-5p	NM_001280549	PAX5	.(((((((.((((.((.((((.&)))).))..)))).))))))).	6394	6416	1	-23.4	1	0.000254438	0.412	0.0150528	0.0638012	-5.70655	17	22	7	3UTR		1	1
hsa-miR-185-5p	NM_001280553	PAX5	.(((((((.((((.((.((((.&)))).))..)))).))))))).	6410	6432	1	-23.4	1	0.000254438	0.412	-0.110077	0.00723225	-5.70655	17	22	7	3UTR		1	1
hsa-miR-185-5p	NM_001286050	FAM168A	.(((((((((.((.((((((..&)))))).....)).))))))))).	1895	1919	1	-22.1	1	0.00148333	0.456	0.0296899	0.131863	-7.47494	17	24	9	3UTR		1	1
hsa-miR-185-5p	NM_001286247	RALGPS2	((((((((..((((..((((((&)))))).....)))).....)))))))).	6020	6049	1	-22.5	1	0.195489	0.544	3.12553	0.561847	-7.20497	18	29	8	3UTR		1	1
hsa-miR-185-5p	NM_001288738	DNM1	.((((((((((((((.......&)).)))))))))))).	3261	3277	1	-20.3	1	0.511857	0.456	0.282973	1.81168	-4.02637	14	16	12	3UTR		1	1
hsa-miR-185-5p	NM_001300821	EIF4B	.((((.(...(((((((((((.&)))))).)))))...).)))).	2378	2400	1	-23.8	1	7.74e-07	0.485	1.60126	1.27352	-10.3068	16	22	6	3UTR		1	1
hsa-miR-185-5p	NM_001300983	DLG2	....((((((((((((((....&)))))))))))))).	4291	4306	1	-22.8	1	0.0221675	0.588	0.232021	1.05798	-9.54656	14	15	14	3UTR		1	1
hsa-miR-185-5p	NM_001317123	AGO1	.((.(((.(((((((.(((((.&))))).)))))))))))).	6754	6773	1	-22.6	1	0.0015114	0.426	1.26403	1.97671	-9.37203	17	19	12	3UTR	MIRT045361	1	1
hsa-miR-185-5p	NM_001317123	AGO1	((((((((.((((((.......&.))))))...)))))))).	5204	5256	1	-20.9	1	0.0178145	0.529	1.3595	1.1233	-5.22701	14	19	8	3UTR	MIRT045361	1	1
hsa-miR-185-5p	NM_032440	LCOR	.((((((((((((((((.((..&)).))))))))..)))))))).	8133	8155	1	-19.2	1	0.00064802	0.647	1.62149	1.86372	-3.79332	18	22	8	3UTR		1	1
hsa-miR-185-5p	NM_032552	DAB2IP	(((.((((..(((((((((...&)))))))))..))))))).	4659	4678	1	-25.9	1	0.000521964	0.471	0.801001	0.962092	-9.26849	16	19	9	3UTR		1	1
hsa-miR-185-5p	NM_144624	UHMK1	.((((((((((((((.((((..&.)))))))...))))))))))).	1367	1400	1	-24.2	1	0.0625557	0.632	1.43985	3.38166	-4.02637	18	23	11	3UTR	MIRT045366	1	1
hsa-miR-185-5p	NM_145695	DGKB	(((((((((((.((((((((((&)))))))))....).)))))).))))).	2912	2940	1	-21.8	1	0.00215866	0.603	3.56606	4.25801	-7.28438	21	28	9	3UTR		1	1
hsa-miR-185-5p	NM_147156	SGMS1	((((((((((((((((..((((&)))).))))).......))))))))))).	2312	2341	1	-21.8	1	0.00891171	0.588	5.47162	4.83667	-3.93757	20	29	11	3UTR		1	1
hsa-miR-185-5p	NM_152660	FAM76A	.((((((((((.(..((((...&.))))..).)))))))))).	1519	1554	1	-23.2	1	0.000103289	0.603	1.32032	1.74004	-8.73242	15	20	10	3UTR		1	1
hsa-miR-185-5p	NM_153442	GPR26	((((((((((((((((((((..&))))................)))).)))))))))))).	1269	1307	1	-23.2	1	0.00034191	0.485	0.0802109	0.100995	-3.93757	20	38	12	3UTR		1	1
hsa-miR-185-5p	NM_153442	GPR26	((((((((((((((...(((((&))).)))))))))))))))).	4319	4340	1	-22.7	1	0.00164072	0.632	1.12959	0.464961	-4.90607	19	21	16	3UTR		1	1
hsa-miR-185-5p	NM_173156	SMG7	..((((....((((((((((..&)))))))))).....)))).	3770	3790	1	-22.6	1	0.00280232	0.471	3.51318	2.73967	-11.1132	14	20	10	3UTR	MIRT045344	1	1
hsa-miR-185-5p	NM_173478	CNTD1	.(((((.(((((((.(((((((&))).)))).).)))))).))))).	1556	1580	1	-20.6	1	0.0303897	0.618	0.0721141	0.177787	-6.07246	19	24	6	3UTR		1	1
hsa-miR-185-5p	NM_173495	PTCHD1	((((((((..(((((..(((((&))))).)))))....)))))))).	4596	4620	1	-21.7	1	0.0153443	0.647	0.667375	0.955147	-6.46952	18	24	8	3UTR		1	1
hsa-miR-185-5p	NM_199334	THRA	.((.((((..((((((((((((&))))))))).........)))..)))).)).	3055	3086	1	-23.1	1	6.85e-06	0.426	2.58392	1.02549	-9.12424	18	31	9	3UTR		1	1
hsa-miR-185-5p	NM_201568	SMG7	..((((....((((((((((..&)))))))))).....)))).	3632	3652	1	-22.6	1	0.00280232	0.471	3.51318	2.73967	-11.1132	14	20	10	3UTR	MIRT045344	1	1
hsa-miR-185-5p	NM_201995	SF1	.((((((..(((((((((....&)))))))))................)))))).	2548	2580	1	-21.9	1	0.0118087	0.544	5.12772	5.8108	-7.16335	15	32	9	3UTR	MIRT738265	1	1
hsa-miR-185-5p	NM_201997	SF1	.((((((..(((((((((....&)))))))))................)))))).	2347	2379	1	-21.9	1	0.0118087	0.544	5.12772	5.8108	-7.16335	15	32	9	3UTR	MIRT738265	1	1
hsa-miR-185-5p	NM_201997	SF1	(((((((((.((((((......&))))).).))))))))).	2526	2544	1	-18.4	1	0.0267543	0.603	0.178192	1.27192	-5.18008	15	18	9	3UTR	MIRT738265	1	1
hsa-miR-185-5p	NM_201998	SF1	.((((((..(((((((((....&)))))))))................)))))).	2343	2375	1	-21.9	1	0.0118087	0.544	5.12772	5.8108	-7.16335	15	32	9	3UTR	MIRT738265	1	1
hsa-miR-185-5p	NM_201998	SF1	(((((((((.((((((......&))))).).))))))))).	2522	2540	1	-18.4	1	0.0267543	0.603	0.178192	1.27192	-5.18008	15	18	9	3UTR	MIRT738265	1	1
hsa-miR-185-5p	XM_005251719	DAB2IP	(((.((((..(((((((((...&)))))))))..))))))).	5857	5876	1	-25.9	1	0.000521964	0.471	0	0	-9.26849	16	19	9	3UTR		1	1
hsa-miR-185-5p	XM_005251719	DAB2IP	.((((((((.(((((((((((.&))).))))..)))).)))))))).	5506	5530	1	-25	1	0.0274472	0.338	0	0	-5.03583	19	24	8	3UTR		1	1
hsa-miR-185-5p	XM_005268730	FAIM2	.((((((...(((((.(((((.&))))).))).))....)))))).	4162	4185	1	-24.8	1	1.69e-05	0.368	0	0	-8.6389	16	23	6	3UTR		1	1
hsa-miR-185-5p	XM_005268730	FAIM2	(((((((((((((..((((((.&))))))..)).).......)))))))))).	3080	3110	1	-22.3	1	0.032954	0.426	0	0	-5.52986	19	30	10	3UTR		1	1
hsa-miR-185-5p	XM_005268730	FAIM2	(((((((((((((((.......&))))))))))).)))).	1312	1329	1	-21.9	1	0.00717436	0.5	0	0	-4.17062	15	17	11	3UTR		1	1
hsa-miR-185-5p	XM_005273810	DLG2	....((((((((((((((....&)))))))))))))).	3988	4003	1	-22.8	1	0.0221675	0.588	0	0	-9.54656	14	15	14	3UTR		1	1
hsa-miR-185-5p	XM_006712083	SLC8A1	.((((((((((((((((((((.&))))))).)))......)))))))))).	3772	3800	1	-24.2	1	0.187748	0.559	0	0	-3.79332	20	28	10	3UTR	MIRT735112	1	1
hsa-miR-185-5p	XM_006712083	SLC8A1	((((((((...((((.((((..&.))))))))..)))))))).	3253	3300	1	-24	1	0.0047359	0.559	0	0	-9.29429	16	20	8	3UTR	MIRT735112	1	1
hsa-miR-185-5p	XM_006721811	TANC2	.((((((((..((((((((((.&)))))))))))))))))).	7541	7560	1	-24.2	1	0.00638219	0.706	0	0	-7.86061	18	19	18	3UTR		1	1
hsa-miR-185-5p	XM_006722760	NFIX	.((.(((.(((((((((.(((.&.)))))))))))).))).)).	1714	1753	1	-24.1	1	0.000118231	0.382	0	0	-9.13898	17	21	12	3UTR		1	1
hsa-miR-185-5p	XM_006724577	SPIN3	(((((((...(((....(((((&))))).....)))...))))))).	4110	4134	1	-20.9	1	0.0915836	0.559	0	0	-10.3754	15	24	7	3UTR		1	1
hsa-miR-185-5p	XM_006724578	SPIN3	(((((((...(((....(((((&))))).....)))...))))))).	4017	4041	1	-20.9	1	0.0915836	0.559	0	0	-10.3754	15	24	7	3UTR		1	1
hsa-miR-185-5p	XM_011512675	SEC22A	((((((((((((((((((((..&.))))).....))))...))))))))))).	1252	1290	1	-25.9	1	0.157572	0.588	0	0	-3.93757	20	30	11	3UTR		1	1
hsa-miR-185-5p	XM_011522497	ABCC1	((((((((.(((((((......&)))))))....)))))))).	4967	4987	1	-22.6	1	0.00272733	0.485	0	0	-4.99396	15	20	8	3UTR		1	1
hsa-miR-185-5p	XM_011524602	TANC2	.((((((((..((((((((((.&)))))))))))))))))).	7453	7472	1	-24.2	1	0.00638219	0.706	0	0	-7.86061	18	19	18	3UTR		1	1
hsa-miR-185-5p	XM_011533054	SLC8A1	.((((((((((((((((((((.&))))))).)))......)))))))))).	3689	3717	1	-24.2	1	0.187748	0.559	0	0	-3.79332	20	28	10	3UTR	MIRT735112	1	1
hsa-miR-185-5p	XM_011533054	SLC8A1	((((((((...((((.((((..&.))))))))..)))))))).	3170	3217	1	-24	1	0.0047359	0.559	0	0	-9.29429	16	20	8	3UTR	MIRT735112	1	1
hsa-miR-185-5p	XM_017001866	CAMK1G	(((((((..((((((..((...&.)).)))))).....))))))).	2214	2242	1	-20.9	1	0.008542	0.485	0	0	-7.54065	15	23	7	3UTR		1	1
hsa-miR-185-5p	XM_017001867	CAMK1G	(((((((..((((((..((...&.)).)))))).....))))))).	2065	2093	1	-20.9	1	0.008542	0.485	0	0	-7.54065	15	23	7	3UTR		1	1
hsa-miR-185-5p	XM_017023241	ABCC1	((((((((.(((((((......&)))))))....)))))))).	4769	4789	1	-22.6	1	0.00272733	0.485	0	0	-4.99396	15	20	8	3UTR		1	1
hsa-miR-185-5p	XM_017024878	CA10	.(((((((.((((((.......&)))))).))))))).	904	919	1	-18.8	1	0.508732	0.515	0	0	-5.08276	13	15	7	3UTR		1	1
hsa-miR-185-5p	XM_024447417	DAB2IP	(((.((((..(((((((((...&)))))))))..))))))).	5866	5885	1	-25.9	1	0.000521964	0.471	0	0	-9.26849	16	19	9	3UTR		1	1
hsa-miR-185-5p	XM_024447417	DAB2IP	.((((((((.(((((((((((.&))).))))..)))).)))))))).	5515	5539	1	-25	1	0.0274472	0.338	0	0	-5.03583	19	24	8	3UTR		1	1
hsa-miR-185-5p	NM_014911	AAK1	.((((((.((((.(((((((((&))))))))))))))))))).	9211	9231	1	-24.4	1	0.000252673	0.574	0.565565	0.588069	-7.39609	19	20	19	3UTR		1	1
hsa-miR-185-5p	NM_015157	PHLDB1	.(((((((((((((((((((..&))))))))....))))))))..))).	5238	5264	1	-21.8	1	0.0906816	0.441	-0.290374	0.640192	-3.79332	19	26	8	3UTR		1	1
hsa-miR-185-5p	NM_015159	FAM168A	.(((((((((.((.((((((..&)))))).....)).))))))))).	1868	1892	1	-22.1	1	0.00148333	0.456	-0.0458662	0.202182	-7.47494	17	24	9	3UTR		1	1
hsa-miR-185-5p	NM_015359	SLC39A14	((((((((.((((..(((((((&.))))))))))).)))))))).	3030	3063	1	-25.5	1	0.00121584	0.485	1.59942	1.92684	-6.58625	19	22	11	3UTR		1	1
hsa-miR-185-5p	NM_015642	ZBTB20	((..(((((((((((..((...&))..)))))))))))..)).	23255	23275	1	-24.5	1	0.000757935	0.412	3.03628	2.67767	-8.76019	15	20	11	3UTR		1	1
hsa-miR-185-5p	NM_017583	TRIM44	(((.((((.(((.(.((((((.&)))))).)))).)))).))).	5222	5243	1	-21	1	0.00685286	0.544	0.0172396	0.10172	-10.0506	17	21	6	3UTR		1	1
hsa-miR-185-5p	NM_020168	PAK6	(((((((((((((((.(((((.&))))).)))))).................))))))))).	2611	2650	1	-28	1	0.0816097	0.456	1.31955	0.651835	-4.17062	20	39	9	3UTR		1	1
hsa-miR-185-5p	NM_020344	SLC24A2	(((((((((((.(((((.((((&.)))).))))).))).....)))))))).	4352	4410	1	-24.9	1	0.000588684	0.426	0.311375	0.10265	-7.28438	20	29	8	3UTR		1	1
hsa-miR-185-5p	NM_020344	SLC24A2	.((((.((..((((.((((((.&)))))).))))..)).)))).	4289	4310	1	-22.1	1	0.0261286	0.574	-0.002	0.249275	-8.72863	16	21	6	3UTR		1	1
hsa-miR-185-5p	NM_021961	TEAD1	(((((.((...(((.((((((.&)))))).)))))))))).	3474	3492	1	-21.9	1	5.14e-05	0.544	0.302312	0.248524	-11.6977	16	18	10	3UTR		1	1
hsa-miR-185-5p	NM_022465	IKZF4	((((((((.(((..((((((..&))))))..)))...)))))))).	4582	4605	1	-23.7	1	0.000662702	0.456	1.76347	2.55146	-7.13993	17	23	8	3UTR		1	1
hsa-miR-185-5p	NM_022465	IKZF4	.((((((((((((....((...&))..)))))))))))).	3040	3057	1	-22.4	1	0.00519758	0.544	0.666018	1.08955	-5.61866	14	17	12	3UTR		1	1
hsa-miR-185-5p	NM_002309	LIF	.((((((.(((((((((((((.&))))))))))))))))..))).	2900	2922	1	-30.1	1	0.0383192	0.397	-0.256876	0.0523861	-6.10696	19	22	16	3UTR		1	1
hsa-miR-185-5p	NM_002309	LIF	.(((((((((..(((((((((.&)))))))))..))))))))).	3246	3267	1	-26.6	1	9.22e-05	0.441	2.83951	1.67636	-9.9649	18	21	9	3UTR		1	1
hsa-miR-185-5p	NM_002309	LIF	.(((.((((((((((((((((.&)))))))).........................)))))))).))).	2039	2085	1	-25	1	0.00312031	0.441	0.0987885	1.35983	-7.91236	19	46	8	3UTR		1	1
hsa-miR-185-5p	NM_002338	LSAMP	((((((((((((((.((((((.&)))))).))))..))))....)))))).	2164	2192	1	-24.5	1	0.0889786	0.515	0.185912	0.0255649	-4.67302	20	28	6	3UTR		1	1
hsa-miR-185-5p	NM_002442	MSI1	((((((((((((((...((.((&)).))))))).))))))))).	2871	2892	1	-19.9	1	0.0399905	0.559	0.343173	0.438287	-4.90607	18	21	9	3UTR		1	1
hsa-miR-185-5p	NM_003105	SORL1	.((((((((((((((((.....&.)))))))).)))))))).	9646	9676	1	-26	1	0.0181634	0.471	-0.192102	-0.287365	-3.79332	16	19	8	3UTR		1	1
hsa-miR-185-5p	NM_003458	BSN	.(((((((.(((((((((((..&)))).)))))))..))))))).	15131	15153	1	-23.5	1	0.00400283	0.412	0.366779	0.233661	-4.84971	18	22	7	3UTR		1	1
hsa-miR-185-5p	NM_003709	KLF7	(.(((((.(((((((((((...&)))))))).)))..))))).).	3933	3955	1	-24.8	1	0.00553333	0.603	-0.309064	0.227534	-7.41489	17	22	8	3UTR		1	1
hsa-miR-185-5p	NM_003709	KLF7	(((((....(((((((((....&)))))))))....))))).	5914	5933	1	-21.3	1	5.05e-05	0.559	2.37726	2.07335	-10.7522	14	19	9	3UTR		1	1
hsa-miR-185-5p	NM_004630	SF1	.((((((..(((((((((....&)))))))))................)))))).	2980	3012	1	-21.9	1	0.0118087	0.544	5.12772	5.8108	-7.16335	15	32	9	3UTR	MIRT738265	1	1
hsa-miR-185-5p	NM_004924	ACTN4	.(((((((..(((((.......&))))).))))))).	3662	3676	1	-21.4	1	0.0435373	0.588	0.88778	2.04638	-6.32527	12	14	7	3UTR	MIRT045364	1	1
hsa-miR-185-5p	NM_005288	GPR12	(((((((.((((((((((((..&.))))))...........))))))))))))).	2806	2860	1	-26.7	1	0.00123586	0.5	0	0	-6.25121	19	32	13	3UTR		1	1
hsa-miR-185-5p	NM_005413	SIX3	.((.(((((((((((.......&))))))))))).)).	2405	2420	1	-20	1	0.418489	0.515	0.733051	1.65852	-7.0584	13	15	11	3UTR		1	1
hsa-miR-185-5p	NM_006517	SLC16A2	.(((((((..((((((((((((&)))))))))..)))))))))).	3210	3232	1	-26.7	1	0.0210808	0.5	0.701239	0.417398	-6.09222	19	22	10	3UTR		1	1
hsa-miR-185-5p	NM_006517	SLC16A2	(((((((((.((((.(.(((((&))))).).).)))...))))))))).	3816	3842	1	-24.8	1	0.000853267	0.515	1.87463	0.74095	-5.91553	19	26	9	3UTR		1	1
hsa-miR-185-5p	NM_012117	CBX5	.(((((((((.((((((((((.&.))))).....)))))...))))))))).	10372	10416	1	-23.6	1	0.000935655	0.5	1.23295	0.985863	-6.6181	19	29	9	3UTR		1	1
hsa-miR-185-5p	NM_012199	AGO1	.((.(((.(((((((.(((((.&))))).)))))))))))).	6849	6868	1	-22.6	1	0.0015114	0.426	2.60447	1.32118	-9.37203	17	19	12	3UTR	MIRT045361	1	1
hsa-miR-185-5p	NM_012306	FAIM2	(((((((((((((..((((((.&))))))..)).).......)))))))))).	3260	3290	1	-22.3	1	0.032954	0.426	0.377201	-0.0718024	-5.52986	19	30	10	3UTR		1	1
hsa-miR-185-5p	NM_012306	FAIM2	(((((((((((((((.......&))))))))))).)))).	1492	1509	1	-21.9	1	0.00717436	0.5	0.17537	0.0786647	-4.17062	15	17	11	3UTR		1	1
hsa-miR-185-5p	NM_012430	SEC22A	(((((((((((((((.......&))))...))))))))))).	1088	1107	1	-21.9	1	0.157572	0.588	0.502044	1.15782	-4.17062	15	19	11	3UTR		1	1
hsa-miR-185-5p	NM_012446	SSBP2	(((..(((((((((((((((((&))))))))...................)))))).)))..))).	2537	2580	1	-21.1	1	0.00134565	0.632	0.158282	0.0783204	-11.0886	20	43	8	3UTR		1	1
hsa-miR-185-5p	NM_014252	SLC25A15	(((((((((((((((.......&.))))))))))))))).	3379	3416	1	-23.5	1	0.109067	0.647	0.254744	0.0253564	-4.17062	15	17	15	3UTR		1	1
hsa-miR-185-5p	NM_014548	TMOD2	.((((.((((((((((((((((&)))))).........)))))))).)).)))).	5848	5880	1	-20.4	1	0.0112335	0.647	-0.00423191	0.0878007	-5.69428	20	32	8	3UTR		1	1
hsa-miR-185-5p	NM_001330222	CNTD1	.(((((.(((((((.(((((((&))).)))).).)))))).))))).	1338	1362	1	-20.6	1	0.0303897	0.618	0.0721141	0.177787	-6.07246	19	24	6	3UTR		1	1
hsa-miR-185-5p	NM_001330654	EIF4B	.((((.(...(((((((((((.&)))))).)))))...).)))).	2246	2268	1	-23.8	1	7.74e-07	0.485	1.60126	1.27352	-10.3068	16	22	6	3UTR		1	1
hsa-miR-185-5p	NM_001331007	SMG7	..((((....((((((((((..&)))))))))).....)))).	3921	3941	1	-22.6	1	0.00280232	0.471	3.51318	2.73967	-11.1132	14	20	10	3UTR	MIRT045344	1	1
hsa-miR-185-5p	NM_001348800	ZBTB20	((..(((((((((((..((...&))..)))))))))))..)).	23615	23635	1	-24.5	1	0.000757935	0.412	3.61851	3.19077	-8.76019	15	20	11	3UTR		1	1
hsa-miR-185-5p	NM_001351089	IKZF4	((((((((.(((..((((((..&))))))..)))...)))))))).	4653	4676	1	-23.7	1	0.000662702	0.456	1.76347	2.55146	-7.13993	17	23	8	3UTR		1	1
hsa-miR-185-5p	NM_001351089	IKZF4	.((((((((((((....((...&))..)))))))))))).	3111	3128	1	-22.4	1	0.00519758	0.544	0.666018	1.08955	-5.61866	14	17	12	3UTR		1	1
hsa-miR-185-5p	NM_001351090	IKZF4	((((((((.(((..((((((..&))))))..)))...)))))))).	4496	4519	1	-23.7	1	0.000662702	0.456	1.76347	2.55146	-7.13993	17	23	8	3UTR		1	1
hsa-miR-185-5p	NM_001351090	IKZF4	.((((((((((((....((...&))..)))))))))))).	2954	2971	1	-22.4	1	0.00519758	0.544	0.666018	1.08955	-5.61866	14	17	12	3UTR		1	1
hsa-miR-185-5p	NM_001351494	SLC8A1	.((((((((((((((((((((.&))))))).)))......)))))))))).	3750	3778	1	-24.2	1	0.187748	0.559	-0.295464	-0.0594864	-3.79332	20	28	10	3UTR	MIRT735112	1	1
hsa-miR-185-5p	NM_001364	DLG2	....((((((((((((((....&)))))))))))))).	4345	4360	1	-22.8	1	0.0221675	0.588	2.4165	2.1989	-9.54656	14	15	14	3UTR		1	1
hsa-miR-185-5p	NM_001370208	FBXL20	(((..(((((.(((((((((..&))))))))).).))))..))).	2916	2938	1	-22.8	1	0.0483553	0.529	-0.187032	0.193439	-13.9134	17	22	9	3UTR		1	1
hsa-miR-185-5p	NM_001371575	AAK1	.((((((.((((.(((((((((&))))))))))))))))))).	9093	9113	1	-24.4	1	0.000252673	0.574	0.545449	0.421739	-7.39609	19	20	19	3UTR		1	1
hsa-miR-185-5p	NM_001372052	HP1BP3	((((((((((((.((.......&)))))))))))))).	3480	3495	1	-18.6	1	0.314937	0.603	0.210516	0.743058	-5.45975	14	15	14	3UTR		1	1
hsa-miR-185-5p	NM_001374269	DNM1	.((((((((((((((.......&)).)))))))))))).	3224	3240	1	-20.3	1	0.511857	0.456	0.282973	1.81168	-4.02637	14	16	12	3UTR		1	1
hsa-miR-185-5p	NM_001376797	HP1BP3	.((.....(((((((((((((.&)))))))))))))...)).	1956	1975	1	-21	0	0.0126623	0.588	3.14124	3.52594	-16.7027	15	19	13	3UTR		1	1
hsa-miR-185-5p	NM_001376797	HP1BP3	((((((((...(.((.(((((.&))))))))...)))))))).	1116	1136	1	-18.8	1	0.0228752	0.529	0.519953	0.20905	-10.5834	16	20	8	3UTR		1	1
hsa-miR-185-5p	NM_001377968	DLG2	....((((((((((((((....&)))))))))))))).	4333	4348	1	-22.8	1	0.0221675	0.588	1.7723	2.25909	-9.54656	14	15	14	3UTR		1	1
hsa-miR-185-5p	NM_001377972	DLG2	....((((((((((((((....&)))))))))))))).	3914	3929	1	-22.8	1	0.0221675	0.588	1.54949	1.60556	-9.54656	14	15	14	3UTR		1	1
hsa-miR-185-5p	NM_001377979	DLG2	....((((((((((((((....&)))))))))))))).	2651	2666	1	-22.8	1	0.0221675	0.588	2.60662	2.43585	-9.54656	14	15	14	3UTR		1	1
hsa-miR-185-5p	NM_001417	EIF4B	.((((.(...(((((((((((.&)))))).)))))...).)))).	2363	2385	1	-23.8	1	7.74e-07	0.485	1.60126	1.27352	-10.3068	16	22	6	3UTR		1	1
hsa-miR-185-5p	NM_001791	CDC42	(((((((((((((((.......&)))))))).))))))).	1298	1315	1	-22.3	1	0.0493915	0.632	2.87861	1.53427	-4.17062	15	17	8	3UTR	MIRT004037	1	1
hsa-miR-185-5p	NM_000396	CTSK	((((((((..(((((.......&.))))))))))))).	1199	1220	1	-17.2	1	0.375804	0.529	3.84213	3.27853	-6.46952	13	15	13	3UTR		1	1
hsa-miR-185-5p	NM_000876	IGF2R	.((((((((((((..(((((..&))))).....)))))))))))).	11141	11164	1	-23.2	1	0.00927807	0.529	0.11084	-0.286636	-5.38561	17	23	12	3UTR		1	1
hsa-miR-185-5p	NM_001008701	ADGRL1	(((((((..(((((..((((((&))))))..)).)))......................))))))).	6371	6415	1	-21.4	1	0.00418567	0.309	3.46541	3.94564	-8.2761	18	44	7	3UTR		1	1
hsa-miR-185-5p	NM_001010862	SPIN3	(((((((((((((..((((...&))))..))))))...))))))).	2434	2457	1	-21.9	1	9e-06	0.574	0.231411	0.355157	-5.52986	17	23	7	3UTR		1	1
hsa-miR-185-5p	NM_001033723	ZNF704	.((((((((.((((((((((..&.)))))))))).)))))))).	4815	4865	1	-30.7	1	0.000352644	0.426	0.270788	0.23249	-5.03583	18	21	10	3UTR		1	1
hsa-miR-185-5p	NM_001039802	CDC42	(((((((((((((((.......&)))))))).))))))).	1424	1441	1	-22.3	1	0.0493915	0.632	2.87861	1.53427	-4.17062	15	17	8	3UTR	MIRT004037	1	1
hsa-miR-185-5p	NM_001040002	MEOX1	(((((((...(((((((((((.&)))))))))))...))...))))).	1460	1485	1	-23.9	1	3.46e-05	0.515	-0.0135581	0.171958	-8.55011	18	25	11	3UTR		1	1
hsa-miR-185-5p	NM_001080450	BEND3	.((((((..(..(((((((((.&)))))))))..)..)))))).	4849	4870	1	-24.5	1	4.91e-05	0.544	1.78398	3.27108	-13.3349	16	21	9	3UTR		1	1
hsa-miR-185-5p	NM_001082534	CA10	.(((((((((((((((.((((.&)))).))............................))))))))))))).	2818	2867	1	-22.9	1	0.0648114	0.632	0.664115	1.29315	-3.79332	19	49	13	3UTR		1	1
hsa-miR-185-5p	NM_001112800	SLC8A1	.((((((((((((((((((((.&))))))).)))......)))))))))).	3656	3684	1	-24.2	1	0.187748	0.559	-0.0496361	-0.197507	-3.79332	20	28	10	3UTR	MIRT735112	1	1
hsa-miR-185-5p	NM_001112800	SLC8A1	((((((((...((((.((((..&.))))))))..)))))))).	3155	3184	1	-24	1	0.0047359	0.559	0.156848	-0.0377753	-9.29429	16	20	8	3UTR	MIRT735112	1	1
hsa-miR-185-5p	NM_001112802	SLC8A1	((((((((...((((.((((..&.))))))))..)))))))).	3149	3178	1	-24	1	0.0047359	0.559	-0.0369997	-0.0556094	-9.29429	16	20	8	3UTR	MIRT735112	1	1
hsa-miR-185-5p	NM_001127321	CBX5	.(((((((((.((((((((((.&.))))).....)))))...))))))))).	10335	10379	1	-23.6	1	0.000935655	0.5	1.27097	1.08298	-6.6181	19	29	9	3UTR		1	1
hsa-miR-185-5p	NM_001127322	CBX5	.(((((((((.((((((((((.&.))))).....)))))...))))))))).	10533	10577	1	-23.6	1	0.000935655	0.5	1.83642	1.52132	-6.6181	19	29	9	3UTR		1	1
hsa-miR-185-5p	NM_001128431	SLC39A14	((((((((.((((..(((((((&.))))))))))).)))))))).	3030	3063	1	-25.5	1	0.00121584	0.485	1.59942	1.92684	-6.58625	19	22	11	3UTR		1	1
hsa-miR-185-5p	NM_001135773	SPATA2	((((((((..(((((...((((&)))).......)))))..)))))))).	2102	2129	1	-19.6	1	0.0967915	0.559	0.357189	-0.0436066	-6.46952	17	27	8	3UTR	MIRT467327	1	1
hsa-miR-185-5p	NM_001142700	DLG2	....((((((((((((((....&)))))))))))))).	3704	3719	1	-22.8	1	0.0221675	0.588	0.624357	0.759616	-9.54656	14	15	14	3UTR		1	1
hsa-miR-185-5p	NM_001142702	DLG2	....((((((((((((((....&)))))))))))))).	2609	2624	1	-22.8	1	0.0221675	0.588	2.1308	2.6875	-9.54656	14	15	14	3UTR		1	1
hsa-miR-185-5p	NM_001142885	TMOD2	.((((.((((((((((((((((&)))))).........)))))))).)).)))).	5740	5772	1	-20.4	1	0.0112335	0.647	-0.00423191	0.0878007	-5.69428	20	32	8	3UTR		1	1
hsa-miR-185-5p	NM_001143912	FAM76A	.((((((((((.(..((((...&.))))..).)))))))))).	1621	1656	1	-23.2	1	0.000103289	0.603	1.32032	1.74004	-8.73242	15	20	10	3UTR		1	1
hsa-miR-185-5p	NM_001143913	FAM76A	.((((((((((.(..((((...&.))))..).)))))))))).	1534	1569	1	-23.2	1	0.000103289	0.603	1.32032	1.74004	-8.73242	15	20	10	3UTR		1	1
hsa-miR-185-5p	NM_001143914	FAM76A	.((((((((((.(..((((...&.))))..).)))))))))).	1432	1467	1	-23.2	1	0.000103289	0.603	1.32032	1.74004	-8.73242	15	20	10	3UTR		1	1
hsa-miR-185-5p	NM_001143915	FAM76A	.((((((((((.(..((((...&.))))..).)))))))))).	1279	1314	1	-23.2	1	0.000103289	0.603	1.32032	1.74004	-8.73242	15	20	10	3UTR		1	1
hsa-miR-185-5p	NM_001144758	PHLDB1	.(((((((((((((((((((..&))))))))....))))))))..))).	4929	4955	1	-21.8	1	0.0906816	0.441	-0.290374	0.640192	-3.79332	19	26	8	3UTR		1	1
hsa-miR-185-5p	NM_001144759	PHLDB1	.(((((((((((((((((((..&))))))))....))))))))..))).	4755	4781	1	-21.8	1	0.0906816	0.441	-0.290374	0.640192	-3.79332	19	26	8	3UTR		1	1
hsa-miR-185-5p	NM_001164342	ZBTB20	((..(((((((((((..((...&))..)))))))))))..)).	23023	23043	1	-24.5	1	0.000757935	0.412	2.01075	1.77794	-8.76019	15	20	11	3UTR		1	1
hsa-miR-185-5p	NM_001164343	ZBTB20	(((((.(((((((.(((((((.&)))))))..)))..))))))))).	10519	10543	1	-23.8	1	3.43e-05	0.544	0.0129198	0.180167	-6.69537	19	24	9	3UTR		1	1
hsa-miR-185-5p	NM_001164344	ZBTB20	((..(((((((((((..((...&))..)))))))))))..)).	23279	23299	1	-24.5	1	0.000757935	0.412	2.58637	3.05886	-8.76019	15	20	11	3UTR		1	1
hsa-miR-185-5p	NM_001164345	ZBTB20	((..(((((((((((..((...&))..)))))))))))..)).	23233	23253	1	-24.5	1	0.000757935	0.412	1.80564	3.30358	-8.76019	15	20	11	3UTR		1	1
hsa-miR-185-5p	NM_001164345	ZBTB20	(((((.(((((((.(((((((.&)))))))..)))..))))))))).	10267	10291	1	-23.8	1	3.43e-05	0.544	0.087701	0.553208	-6.69537	19	24	9	3UTR		1	1
hsa-miR-185-5p	NM_001164346	ZBTB20	((..(((((((((((..((...&))..)))))))))))..)).	23042	23062	1	-24.5	1	0.000757935	0.412	1.72625	2.14183	-8.76019	15	20	11	3UTR		1	1
hsa-miR-185-5p	NM_001164347	ZBTB20	((..(((((((((((..((...&))..)))))))))))..)).	23064	23084	1	-24.5	1	0.000757935	0.412	2.18277	2.38473	-8.76019	15	20	11	3UTR		1	1
hsa-miR-185-5p	NM_001170765	LCOR	.((((((((((((((((.((..&)).))))))))..)))))))).	8065	8087	1	-19.2	1	0.00064802	0.647	1.62149	1.86372	-3.79332	18	22	8	3UTR		1	1
hsa-miR-185-5p	NM_001170766	LCOR	.((((((((((((((((.((..&)).))))))))..)))))))).	5488	5510	1	-19.2	1	0.00064802	0.647	1.62149	1.86372	-3.79332	18	22	8	3UTR		1	1
hsa-miR-185-5p	NM_001174061	SMG7	..((((....((((((((((..&)))))))))).....)))).	3888	3908	1	-22.6	1	0.00280232	0.471	3.51318	2.73967	-11.1132	14	20	10	3UTR	MIRT045344	1	1
hsa-miR-185-5p	NM_001178031	SF1	.((((((..(((((((((....&)))))))))................)))))).	3062	3094	1	-21.9	1	0.0118087	0.544	4.8856	3.43043	-7.16335	15	32	9	3UTR	MIRT738265	1	1
hsa-miR-185-5p	NM_001184906	FBXL20	(((..(((((.(((((((((..&))))))))).).))))..))).	2702	2724	1	-22.8	1	0.0483553	0.529	-0.205814	-0.0956066	-13.9134	17	22	9	3UTR		1	1
hsa-miR-185-5p	NM_001193288	SLC24A2	(((((((((((.(((((.((((&.)))).))))).))).....)))))))).	4301	4359	1	-24.9	1	0.000588684	0.426	0.621875	0.231162	-7.28438	20	29	8	3UTR		1	1
hsa-miR-185-5p	NM_001193314	VIPAS39	.(((((.(..((((.(((((..&)))))))))..).))))).	2436	2455	1	-18.6	1	0.0680008	0.471	-0.096356	1.72835	-8.37136	15	19	9	3UTR		1	1
hsa-miR-185-5p	NM_001205317	RIMS4	(((((((((((((..((((((.&))))))...))))).)))))))).	3162	3186	1	-28.1	1	7.63e-05	0.456	0	0	-5.52986	19	24	8	3UTR		1	1
hsa-miR-185-5p	NM_001206769	DLG2	....((((((((((((((....&)))))))))))))).	4351	4366	1	-22.8	1	0.0221675	0.588	0	0	-9.54656	14	15	14	3UTR		1	1
hsa-miR-193a-5p	NM_001371589	WIZ	.((((((((((((((.(((((.&))))..).)))...))))))))))).	6227	6253	0.961538	-26.5	1	0.247302	0.412	3.97802	4.09464	-4.02637	19	26	11	3UTR		1	1
hsa-miR-193a-5p	NM_001257197	CUL3	...(((((((.(((((((((((&)))))))))))))))))).	2910	2929	1	-21.3	1	0.00251187	0.706	1.44859	1.14684	-9.33931	18	19	18	3UTR		1	1
hsa-miR-193a-5p	NM_001257198	CUL3	...(((((((.(((((((((((&)))))))))))))))))).	2955	2974	1	-21.3	1	0.00251187	0.706	0.523802	1.48512	-9.33931	18	19	18	3UTR		1	1
hsa-miR-193a-5p	NM_001300936	SRSF10	(((((((((...(((..((((.&))))..)))..))))))))).	1407	1428	1	-22.3	1	0.00197226	0.603	0.0919747	-0.0704845	-11.5847	16	21	9	3UTR		1	1
hsa-miR-193a-5p	NM_031411	PCDHA1	((((.(((((.(((((((((((&)))))))))))...))))))))).	4367	4391	1	-25	1	0.0345616	0.559	2.87345	2.51301	-10.8814	20	24	11	3UTR		1	1
hsa-miR-193a-5p	NM_031500	PCDHA4	(((((....((((((..((((.&)))).)))))).))))).	10011	10029	1	-24	1	0.0132651	0.456	-0.373291	-0.0293623	-10.9853	15	18	6	3UTR		1	1
hsa-miR-193a-5p	NM_031849	PCDHA6	((((.(((((.(((((((((((&)))))))))))...))))))))).	4348	4372	1	-25	1	0.0345616	0.559	2.87345	2.51301	-10.8814	20	24	11	3UTR		1	1
[truncated: 489 more rows]

## Sheet: 与WGCNA-mRNA数据集合并
mirnaid	genesymbol-WGCNA	将预测的miRNA的靶基因与WGCNA-mRNA进行合并得到的原始数据集
hsa-miR-103a-3p	SGMS2
hsa-miR-103a-3p	AGFG1
hsa-miR-103a-3p	AGFG1
hsa-miR-103a-3p	SGMS2
hsa-miR-103a-3p	SGMS2
hsa-miR-125a-5p	AREL1
hsa-miR-125a-5p	BCAT1
hsa-miR-125a-5p	BCAT1
hsa-miR-125a-5p	BCAT1
hsa-miR-125a-5p	BCAT1
hsa-miR-125a-5p	BCAT1
hsa-miR-125b-5p	AREL1
hsa-miR-125b-5p	AREL1
hsa-miR-128-3p	ARRDC4
hsa-miR-128-3p	SETD7
hsa-miR-128-3p	CREB1
hsa-miR-128-3p	CREB1
hsa-miR-128-3p	CREB1
hsa-miR-128-3p	CREB1
hsa-miR-16-5p	DCUN1D1
hsa-miR-16-5p	AREL1
hsa-miR-16-5p	DCUN1D1
hsa-miR-181a-5p	AGFG1
hsa-miR-181a-5p	AGFG1
hsa-miR-181a-5p	AGFG1
hsa-miR-181a-5p	AGFG1
hsa-miR-185-5p	TANC2
hsa-miR-185-5p	TANC2
hsa-miR-185-5p	SIX3
hsa-miR-193a-5p	NETO2
hsa-miR-92a-3p	LIN54
hsa-miR-92a-3p	LIN54
hsa-miR-92a-3p	LIN54
hsa-miR-92a-3p	SETD7
hsa-miR-92a-3p	SETD7
hsa-miR-92a-3p	ASPH
hsa-miR-92a-3p	LIN54
hsa-miR-92a-3p	LIN54
hsa-miR-92a-3p	LIN54
hsa-miR-92a-3p	LIN54

## Sheet: 去重并获取表达上调的mRNAs-miRNA配对
MiRNAs	mRNAs-WGCNA	Regulation
hsa-miR-92a-3p	LIN54	Up
hsa-miR-92a-3p	SETD7	Up
hsa-miR-92a-3p	ASPH	Up
hsa-miR-193a-5p	NETO2	Up
hsa-miR-185-5p	TANC2	Up
hsa-miR-181a-5p	AGFG1	Up
hsa-miR-16-5p	DCUN1D1	Up
hsa-miR-16-5p	AREL1	Up
hsa-miR-128-3p	ARRDC4	Up
hsa-miR-128-3p	SETD7	Up
hsa-miR-128-3p	CREB1	Up
hsa-miR-125b-5p	AREL1	Up
hsa-miR-125a-5p	AREL1	Up
hsa-miR-125a-5p	BCAT1	Up
hsa-miR-103a-3p	SGMS2	Up
hsa-miR-103a-3p	AGFG1	Up
