# Supplementary material for: Comprehensive Analysis of Hub Genes Associated With Competing Endogenous RNA Networks in Stroke Using Bioinformatics Analysis
Source: Frontiers journal article supplement (doi:10.3389/fgene.2021.779923), 2022-01-12
Supplement: Data_Sheet_9.ZIP [file Data_Sheet_9.ZIP]

## Sheet: lncRNAs
Outcome	DKFZP434L187	LINC00550	RP11-111K18.2	RP1-193H18.2
control	2.6266	2.57099	3.37995	5.68031
control	2.78759	2.62329	3.53487	5.96633
control	3.08269	2.50508	3.37903	5.86114
control	2.94568	2.42584	3.29731	5.81708
control	2.58618	2.45639	3.57548	5.61188
control	2.81252	2.30798	3.34992	6.07596
control	2.57402	2.45291	3.15582	5.94796
control	2.83371	2.72796	3.20728	5.87882
control	2.59395	2.55047	3.83995	5.84024
control	2.71189	2.47461	3.37628	5.50183
control	2.70257	2.47084	3.34715	5.88917
control	2.65053	2.36296	3.35547	5.60303
control	3.04008	2.71047	3.38059	5.56678
control	3.02858	2.34231	3.32132	5.75667
control	2.69715	2.62363	3.44168	5.59828
control	2.95182	2.37059	2.94059	5.92243
control	2.92779	2.53669	3.44798	5.62969
control	2.49419	2.66635	3.49583	5.55897
control	2.60592	2.56843	3.61728	5.0252
control	2.78366	2.52875	3.20828	5.16013
Stroke	3.04454	2.79664	3.87967	4.85634
Stroke	2.70032	2.71554	3.34768	5.24973
Stroke	2.78008	2.64905	3.2231	5.38554
Stroke	2.50353	2.45086	3.23361	4.74283
Stroke	2.79699	2.66589	3.05222	5.16922
Stroke	2.9254	2.43564	3.17229	5.60015
Stroke	2.69751	2.42196	3.28363	5.55256
Stroke	2.51241	2.58102	3.19394	5.2522
Stroke	2.68391	2.47019	3.23424	5.51019
Stroke	2.71824	2.37133	3.20369	5.12003
Stroke	2.73887	2.50511	3.26154	6.09534
Stroke	2.78322	2.52374	3.588	5.76158
Stroke	2.74527	2.47487	3.41779	5.65417
Stroke	2.87145	2.5245	3.39772	5.89011
Stroke	2.68285	2.55875	3.4003	5.56053
Stroke	2.77876	2.43796	3.04344	5.60885
Stroke	2.94359	2.65308	3.52609	5.317
Stroke	3.07632	2.72315	3.46412	5.57108
Stroke	2.60292	2.73042	3.5514	5.39991
Stroke	2.55765	2.72075	3.089	5.41775

## Sheet: 前5mRNA
Outcome	TANC2	SIX3	SGMS2	SETD7	NETO2
control	3.09981	3.59135	8.14514	8.84103	6.02642
control	3.36281	3.42106	8.17762	8.94826	6.32908
control	3.3025	3.46852	7.41448	8.54595	5.98452
control	3.30167	3.29726	8.10685	9.15435	6.69725
control	3.40712	3.30674	6.89601	7.99394	6.14436
control	3.32501	3.58446	8.27044	8.74131	6.25465
control	3.04811	3.38372	7.68647	8.46078	5.75141
control	3.36995	3.35234	8.11101	8.83325	5.92643
control	3.12283	3.40069	8.2102	8.42689	6.65469
control	3.46797	3.45966	7.8098	8.60374	5.91881
control	3.48379	3.59738	7.56462	8.41128	6.28941
control	3.36906	3.50007	7.41868	8.2688	5.8768
control	3.77807	3.49555	6.66877	7.83608	5.42779
control	3.78088	3.4902	6.62718	7.92446	5.82469
control	3.54415	3.66088	5.56798	7.63275	5.96729
control	3.46491	3.39138	7.32824	8.03771	6.21039
control	3.35672	3.40479	6.77108	8.16481	5.92449
control	3.53199	3.39051	6.45597	8.16909	5.93879
control	3.87174	3.26879	5.9282	7.86858	6.06141
control	3.92074	3.27402	5.24163	7.69666	6.14118
Stroke	3.45708	3.47004	7.33524	8.60948	6.54303
Stroke	3.43658	3.78532	7.13816	8.44887	6.22249
Stroke	3.75679	3.40364	7.17216	8.46873	6.69488
Stroke	3.10035	3.3682	7.47563	8.39838	6.68285
Stroke	3.47026	3.84833	4.48065	7.86779	5.17077
Stroke	3.36601	3.27541	7.6388	8.88255	6.26981
Stroke	3.55472	3.49075	7.4959	8.57308	6.596
Stroke	3.17181	3.31994	5.36667	7.91576	5.33758
Stroke	3.77054	3.56279	5.95308	7.97931	5.52076
Stroke	3.39733	3.33819	5.92988	8.14223	5.72984
Stroke	3.17129	3.74931	8.04522	8.2131	6.23538
Stroke	3.60337	3.34818	7.15144	8.03288	5.73804
Stroke	3.15345	3.57892	7.84011	8.45823	6.31117
Stroke	3.61706	3.41564	7.6325	8.08118	6.11003
Stroke	3.51546	3.50878	7.74387	8.75132	6.13023
Stroke	3.33845	3.49541	7.80147	8.53183	6.01728
Stroke	3.36806	3.46537	7.80137	8.57503	6.33729
Stroke	3.69032	3.429	6.95042	8.0861	5.9907
Stroke	3.21182	3.44781	7.87113	8.37402	6.09136
Stroke	3.43807	3.65232	8.10863	8.79792	5.73109

## Sheet: 中间4mRNA
Outcome	DCUN1D1	CREB1	BCAT1	ASPH
control	8.46007	8.05856	5.72032	4.47383
control	8.52368	8.53161	5.61149	4.86995
control	8.1978	8.19668	4.86354	4.06483
control	8.46391	8.22918	5.65665	4.67051
control	8.38597	8.25068	5.33979	4.4715
control	8.37508	8.23929	5.65301	4.38934
control	8.48272	8.33104	5.65462	4.35591
control	8.54203	8.65221	5.14353	4.73566
control	8.24187	8.07383	6.08128	4.43405
control	8.18789	8.36022	5.7744	4.84041
control	8.57665	8.51507	5.33574	4.53902
control	8.34427	8.33595	5.53348	4.73801
control	8.38416	7.94317	5.12756	3.92371
control	8.32306	7.57203	5.55457	4.05282
control	8.27141	7.25237	4.82247	4.06777
control	8.44301	8.35139	5.27931	4.05272
control	8.01432	8.05544	5.30483	4.11927
control	8.05328	7.78333	5.58903	3.82321
control	7.94446	7.84617	5.27537	4.10025
control	7.88117	8.03397	5.74829	4.33686
Stroke	8.45712	8.08288	5.70503	4.41324
Stroke	8.01234	7.99905	5.5386	4.08938
Stroke	8.03788	7.68207	5.57764	4.14469
Stroke	7.85759	7.81061	5.4342	4.10458
Stroke	8.01615	8.2116	5.2754	4.24802
Stroke	8.44874	8.23862	5.48534	4.30785
Stroke	8.26306	7.63587	5.65203	4.41494
Stroke	8.0126	7.95675	5.18582	4.03879
Stroke	8.13202	8.26938	5.48076	4.31008
Stroke	7.75182	7.83733	5.72882	4.54042
Stroke	8.39716	8.20226	6.09624	5.05496
Stroke	9.34324	7.65722	5.13673	4.00691
Stroke	8.32434	8.32706	5.30321	4.32067
Stroke	8.39158	7.73149	5.51158	3.64168
Stroke	8.2157	8.20869	5.50686	4.51999
Stroke	8.29974	8.66164	5.59019	4.64842
Stroke	8.22093	8.15572	5.68184	4.3246
Stroke	8.24251	7.7349	5.43056	4.24751
Stroke	8.35693	8.46212	5.53956	4.57384
Stroke	8.21683	8.2448	5.62961	4.35288

## Sheet: 后4个mRNAs
Outcome	ARRDC4	AREL1	AGFG1	LIN54
control	8.43047	5.6238	6.93963	3.6573
control	7.76149	5.36952	7.15531	3.69599
control	7.33961	5.12196	6.56919	3.2669
control	8.7282	5.04082	7.26608	3.7161
control	7.45904	5.56522	6.43135	3.73951
control	7.94702	5.18788	6.75869	3.83734
control	7.73508	5.25104	6.69678	3.86969
control	8.16033	5.22863	7.18442	3.73306
control	8.38545	5.44879	7.0261	3.5332
control	8.79275	5.3241	6.37974	3.95207
control	7.8211	5.1826	6.85606	3.80155
control	7.24815	5.52739	6.81392	3.80667
control	6.88659	5.15732	5.84299	3.51616
control	7.05217	5.51514	5.60985	3.67456
control	5.65496	4.79424	5.70404	4.06044
control	6.9234	5.2725	6.49021	3.8035
control	5.92465	5.35153	6.22123	3.82455
control	6.86738	5.48125	5.92455	3.79898
control	5.88941	5.47261	6.03312	3.68413
control	5.5892	5.37048	6.08856	3.6612
Stroke	7.70193	5.35667	5.7014	3.67746
Stroke	6.89506	5.40369	6.39138	3.78822
Stroke	7.47207	5.50076	6.20526	3.77674
Stroke	5.55291	5.38777	6.41916	3.82025
Stroke	5.1378	5.75678	5.93045	3.58878
Stroke	7.90345	5.31187	6.3604	3.71287
Stroke	7.07143	5.30113	6.19781	3.901
Stroke	5.23357	5.37449	5.9254	3.99735
Stroke	5.36541	5.36143	6.41457	3.7989
Stroke	6.07778	5.6564	6.1137	3.65174
Stroke	7.68513	5.52114	7.20095	4.14715
Stroke	7.15799	5.3372	5.21133	3.829
Stroke	7.60626	5.45344	6.62396	3.77258
Stroke	7.47344	5.25716	5.56432	4.01058
Stroke	7.0172	5.07413	6.7685	3.76172
Stroke	7.78405	5.23789	7.00714	3.93904
Stroke	8.18678	5.33552	6.77777	3.55417
Stroke	7.5829	5.33428	6.63633	3.65511
Stroke	8.35728	5.40606	6.45559	3.9441
Stroke	7.67269	5.46868	6.57408	3.82614
