# Supplementary material for: Comprehensive Analysis of Hub Genes Associated With Competing Endogenous RNA Networks in Stroke Using Bioinformatics Analysis
Source: Front Genet. 2022 Jan 12;12:779923. doi: 10.3389/fgene.2021.779923 (PMC8790239; doi:10.3389/fgene.2021.779923)
Supplement: Supplementary file 6 [file DataSheet1.ZIP]

Archive with 10 entries (9 files):
- Supplementary Material Presentation-figures/
- Supplementary Material Presentation-figures/Figure 1.pdf
- Supplementary Material Presentation-figures/Figure 2.pdf
- Supplementary Material Presentation-figures/Figure 3.pdf
- Supplementary Material Presentation-figures/Figure 4.pdf
- Supplementary Material Presentation-figures/Figure 5.pdf
- Supplementary Material Presentation-figures/Figure 6.pdf
- Supplementary Material Presentation-figures/Figure 7.pdf
- Supplementary Material Presentation-figures/Figure 8.pdf
- Supplementary Material Presentation-figures/Figure 9.pdf
