# Supplementary material for: Comprehensive Analysis of Hub Genes Associated With Competing Endogenous RNA Networks in Stroke Using Bioinformatics Analysis
Source: Front Genet. 2022 Jan 12;12:779923. doi: 10.3389/fgene.2021.779923 (PMC8790239; doi:10.3389/fgene.2021.779923)
Supplement: Supplementary file 10 [file DataSheet7.ZIP]

Archive with 9 entries (8 files):
- Figure 7--raw data/
- Figure 7--raw data/DKFZP434L187.xlsx
- Figure 7--raw data/DLGAP1-AS2.xlsx
- Figure 7--raw data/LINC00282.xlsx
- Figure 7--raw data/LINC00550.xlsx
- Figure 7--raw data/RP1-193H18.2.xlsx
- Figure 7--raw data/RP1-30M3.5.xlsx
- Figure 7--raw data/RP11-111K18.2.xlsx
- Figure 7--raw data/RP11-2E11.9.xlsx
