# Supplementary material for: Comprehensive Analysis of Hub Genes Associated With Competing Endogenous RNA Networks in Stroke Using Bioinformatics Analysis
Source: Front Genet. 2022 Jan 12;12:779923. doi: 10.3389/fgene.2021.779923 (PMC8790239; doi:10.3389/fgene.2021.779923)
Supplement: Supplementary file 10 [file DataSheet7.ZIP › Figure 7--raw data/DKFZP434L187.xlsx]

## Sheet: Sheet1
Outcome	DKFZP434L187
control	-3.43743
control	-2.63625
control	-2.45832
control	-2.27404
control	-2.129
control	-2.97912
control	-2.03419
control	-2.50925
control	-2.65051
control	-1.81985
control	-1.35596
control	-2.05298
control	-1.81075
control	-3.18944
control	-1.92247
control	-3.0752
control	-2.73828
control	-2.13488
control	-3.39135
control	-2.7034
control	-2.8045
control	-2.2554
control	-1.87678
stroke	-3.60948
stroke	-3.3418
stroke	-3.74734
stroke	-5.42927
stroke	-4.56895
stroke	-3.8229
stroke	-3.46393
stroke	-3.64306
stroke	-3.73348
stroke	-3.98154
stroke	-2.84177
stroke	-2.5437
stroke	-2.2996
stroke	-3.09995
stroke	-4.23112
stroke	-2.95721
stroke	-3.43102
stroke	-4.53376
stroke	-5.04947
stroke	-4.00963
stroke	-3.35511
stroke	-4.11419
stroke	-4.1792
