# Supplementary material for: Comprehensive Analysis of Hub Genes Associated With Competing Endogenous RNA Networks in Stroke Using Bioinformatics Analysis
Source: Front Genet. 2022 Jan 12;12:779923. doi: 10.3389/fgene.2021.779923 (PMC8790239; doi:10.3389/fgene.2021.779923)
Supplement: Supplementary file 10 [file DataSheet7.ZIP › Figure 7--raw data/DLGAP1-AS2.xlsx]

## Sheet: Sheet1
Outcome	DLGAP1-AS2
control	-1.51979
control	-1.39951
control	-1.42084
control	-1.86339
control	-2.37399
control	-2.10548
control	-1.67161
control	-2.24872
control	-1.69384
control	-2.57722
control	-2.86991
control	-1.79582
control	-1.939
control	-1.83874
control	-2.7948
control	-2.93347
control	-2.4131
control	-2.60424
control	-2.02764
control	-2.49249
control	-2.06148
control	-1.93181
control	-2.70301
stroke	-0.951273
stroke	-1.65769
stroke	-1.81234
stroke	-0.269497
stroke	-0.404213
stroke	-1.13572
stroke	-0.868456
stroke	-0.864521
stroke	-0.177169
stroke	0.166055
stroke	-2.03302
stroke	-0.828335
stroke	-1.0811
stroke	-0.204831
stroke	-0.517965
stroke	-0.458105
stroke	-0.761779
stroke	-0.838665
stroke	-0.245212
stroke	-0.181498
stroke	-1.50118
stroke	-1.08886
stroke	-0.768406
