# Supplementary material for: Comprehensive Analysis of Hub Genes Associated With Competing Endogenous RNA Networks in Stroke Using Bioinformatics Analysis
Source: Front Genet. 2022 Jan 12;12:779923. doi: 10.3389/fgene.2021.779923 (PMC8790239; doi:10.3389/fgene.2021.779923)
Supplement: Supplementary file 10 [file DataSheet7.ZIP › Figure 7--raw data/LINC00282.xlsx]

## Sheet: Sheet1
Outcome	LINC00282
control	-0.59536
control	-0.32263
control	-0.38431
control	-0.31353
control	-1.59393
control	-0.48841
control	-0.10906
control	-0.54323
control	-0.44584
control	-1.07914
control	-1.31793
control	-1.04712
control	-1.30908
control	-0.98233
control	-1.12133
control	-0.64571
control	-0.89736
control	-0.21757
control	0.2326
control	-0.89762
control	-1.44166
control	-0.98108
control	-1.01469
stroke	-0.0175514
stroke	-0.88221
stroke	1.09332
stroke	0.747603
stroke	-0.0590744
stroke	-0.706391
stroke	0.0433722
stroke	0.549419
stroke	1.64835
stroke	0.727835
stroke	0.509996
stroke	0.494034
stroke	-0.236527
stroke	1.3071
stroke	0.173331
stroke	1.21293
stroke	-0.148744
stroke	0.216231
stroke	-0.180763
stroke	0.987815
stroke	-0.167219
stroke	0.212708
stroke	1.02411
