# Supplementary material for: Comprehensive Analysis of Hub Genes Associated With Competing Endogenous RNA Networks in Stroke Using Bioinformatics Analysis
Source: Front Genet. 2022 Jan 12;12:779923. doi: 10.3389/fgene.2021.779923 (PMC8790239; doi:10.3389/fgene.2021.779923)
Supplement: Supplementary file 10 [file DataSheet7.ZIP › Figure 7--raw data/RP1-30M3.5.xlsx]

## Sheet: Sheet1
Outcome	RP1-30M3.5
control	-0.4571
control	-0.09161
control	-0.21974
control	-0.57461
control	-0.99751
control	-0.42359
control	-0.10906
control	-0.17442
control	-0.47008
control	-0.25687
control	-1.13051
control	-0.39929
control	-0.56561
control	-0.44859
control	-0.70837
control	-0.36408
control	-0.41375
control	-0.49568
control	-0.49386
control	-0.20387
control	-1.05695
control	-0.68222
control	-0.83843
stroke	-0.0591869
stroke	-0.0196981
stroke	-0.26293
stroke	0.324715
stroke	-0.00175953
stroke	0.164259
stroke	0.370117
stroke	0.366501
stroke	0.448572
stroke	0.768437
stroke	-0.521675
stroke	0.672569
stroke	-0.104266
stroke	0.687081
stroke	-0.102975
stroke	0.441328
stroke	-0.0313435
stroke	0.426655
stroke	-0.0369062
stroke	0.0236549
stroke	0.021554
stroke	-0.15948
stroke	-0.090354
