# Supplementary material for: Comprehensive Analysis of Hub Genes Associated With Competing Endogenous RNA Networks in Stroke Using Bioinformatics Analysis
Source: Front Genet. 2022 Jan 12;12:779923. doi: 10.3389/fgene.2021.779923 (PMC8790239; doi:10.3389/fgene.2021.779923)
Supplement: Supplementary file 10 [file DataSheet7.ZIP › Figure 7--raw data/RP1-193H18.2.xlsx]

## Sheet: Sheet1
Outcome	RP1-193H18.2
control	-0.29557
control	0.5637
control	0.6918
control	0.0338001
control	-0.63558
control	-0.83664
control	0.132
control	0.0297003
control	0.00469971
control	-0.42275
control	-0.46485
control	-0.0153399
control	-0.5259
control	-0.54218
control	-0.78069
control	-0.292
control	-0.0766897
control	-0.38158
control	-0.10616
control	0.1504
control	-0.34003
control	-0.7445
control	-0.32782
stroke	0.948132
stroke	0.192695
stroke	0.51314
stroke	1.26532
stroke	0.666451
stroke	0.37086
stroke	0.901258
stroke	0.903832
stroke	1.16534
stroke	1.62468
stroke	-0.110995
stroke	1.27718
stroke	0.446586
stroke	1.4958
stroke	1.41351
stroke	0.910901
stroke	1.34111
stroke	0.773111
stroke	1.52162
stroke	1.60576
stroke	0.284722
stroke	0.636109
stroke	0.437671
