# Supplementary material for: Comprehensive Analysis of Hub Genes Associated With Competing Endogenous RNA Networks in Stroke Using Bioinformatics Analysis
Source: Front Genet. 2022 Jan 12;12:779923. doi: 10.3389/fgene.2021.779923 (PMC8790239; doi:10.3389/fgene.2021.779923)
Supplement: Supplementary file 10 [file DataSheet7.ZIP › Figure 7--raw data/RP11-2E11.9.xlsx]

## Sheet: Sheet1
Outcome	RP11-2E11.9
control	-3.55788
control	-3.4828
control	-2.31393
control	-3.19666
control	-2.84316
control	-3.41017
control	-3.10462
control	-3.12267
control	-3.59395
control	-2.60113
control	-2.60281
control	-3.06476
control	-2.86907
control	-2.8213
control	-2.41402
control	-2.93347
control	-3.38478
control	-2.28069
control	-2.89659
control	-2.60921
control	-3.12011
control	-2.74415
control	-2.19848
stroke	-4.46243
stroke	-3.05333
stroke	-3.89625
stroke	-3.89506
stroke	-3.64845
stroke	-3.46872
stroke	-3.16916
stroke	-4.21789
stroke	-4.31601
stroke	-5.01413
stroke	-3.72165
stroke	-3.6663
stroke	-4.45588
stroke	-4.17434
stroke	-3.68422
stroke	-3.71822
stroke	-3.24549
stroke	-3.31678
stroke	-3.07012
stroke	-3.28472
stroke	-3.35511
stroke	-3.52502
stroke	-3.67972
