# Supplementary material for: Comprehensive Analysis of Hub Genes Associated With Competing Endogenous RNA Networks in Stroke Using Bioinformatics Analysis
Source: Front Genet. 2022 Jan 12;12:779923. doi: 10.3389/fgene.2021.779923 (PMC8790239; doi:10.3389/fgene.2021.779923)
Supplement: Supplementary file 10 [file DataSheet7.ZIP › Figure 7--raw data/RP11-111K18.2.xlsx]

## Sheet: Sheet1
Outcome	RP11-111K18.2
control	-4.95174
control	-4.09765
control	-4.04195
control	-5.31772
control	-4.46078
control	-4.02306
control	-4.31449
control	-3.68264
control	-3.82442
control	-4.22011
control	-5.63466
control	-4.50569
control	-4.19516
control	-4.52258
control	-4.84884
control	-4.10996
control	-4.93049
control	-4.3873
control	-3.86904
control	-4.11793
control	-5.55321
control	-4.45259
control	-4.48598
stroke	-3.18841
stroke	-3.45237
stroke	-4.0578
stroke	-1.3945
stroke	-2.71142
stroke	-2.36704
stroke	-2.33291
stroke	-2.03754
stroke	-1.60508
stroke	-1.48928
stroke	-5.07591
stroke	-1.6629
stroke	-3.91318
stroke	-4.58732
stroke	-2.95009
stroke	-2.39432
stroke	-3.43102
stroke	-3.09623
stroke	-2.73801
stroke	-1.93905
stroke	-3.80278
stroke	-2.65557
stroke	-3.79494
