# Supplementary figures and images for: Comprehensive Analysis of Hub Genes Associated With Competing Endogenous RNA Networks in Stroke Using Bioinformatics Analysis
Source: Frontiers journal article supplement (doi:10.3389/fgene.2021.779923), 2022-01-12

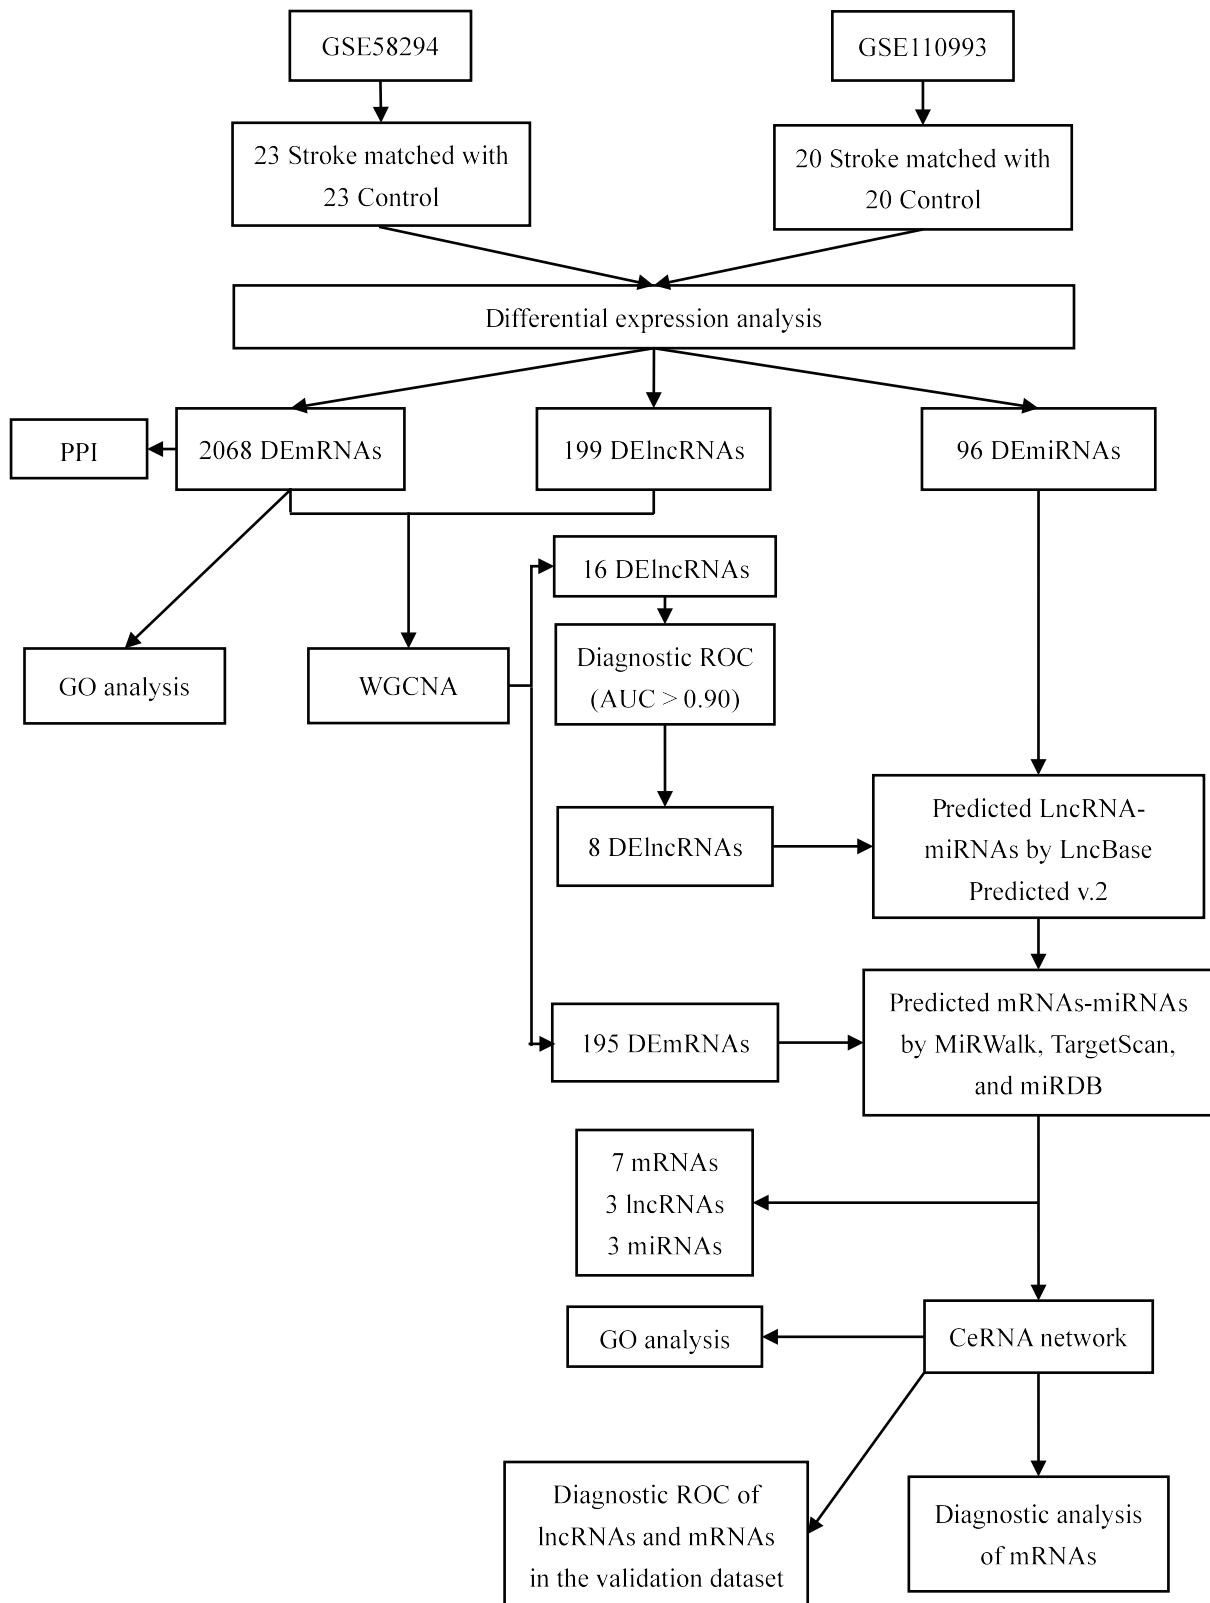

Supplement: Data_Sheet_1.ZIP [file Data_Sheet_1.ZIP]

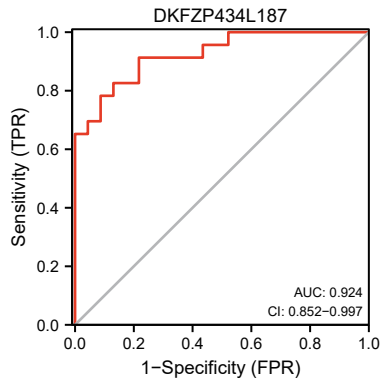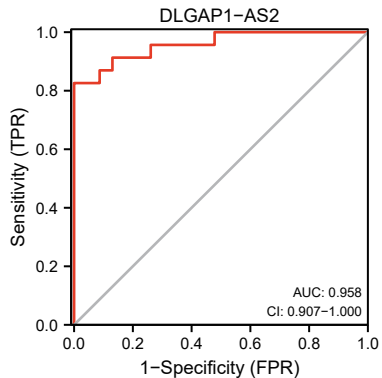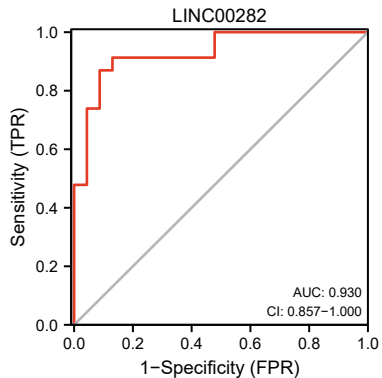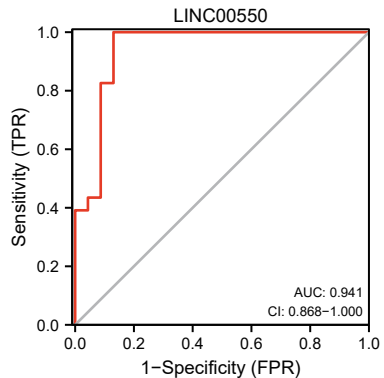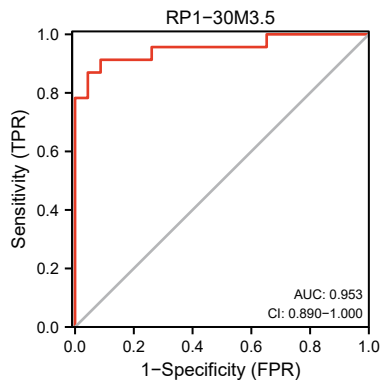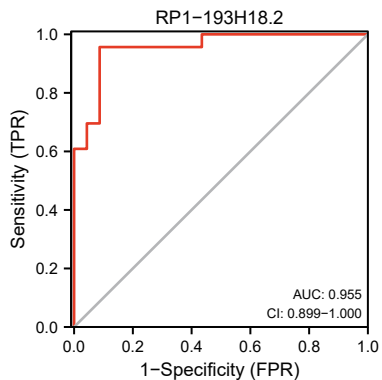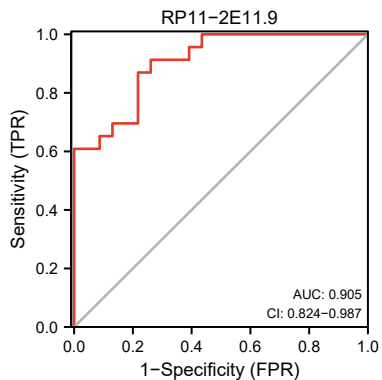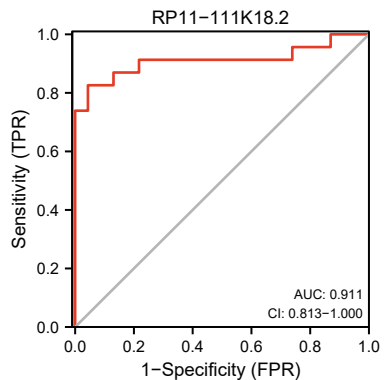

Supplement: Data_Sheet_1.ZIP [file Data_Sheet_1.ZIP]

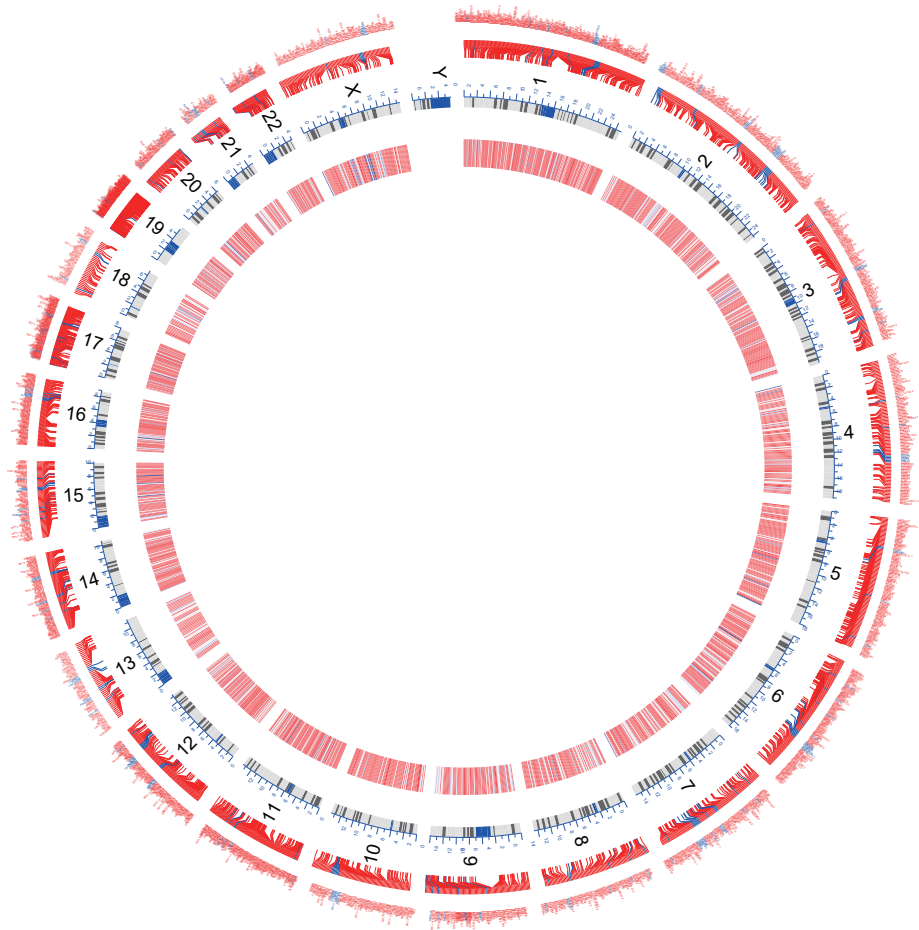

Supplement: Data_Sheet_1.ZIP [file Data_Sheet_1.ZIP]

A

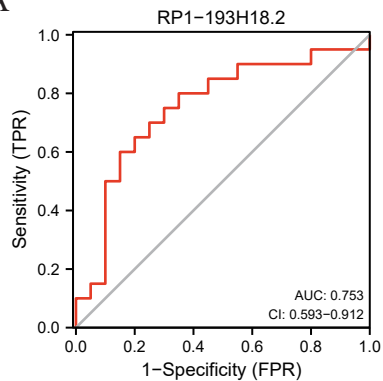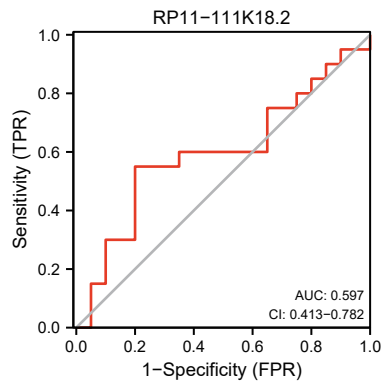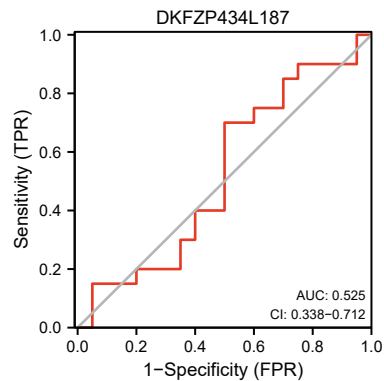

B

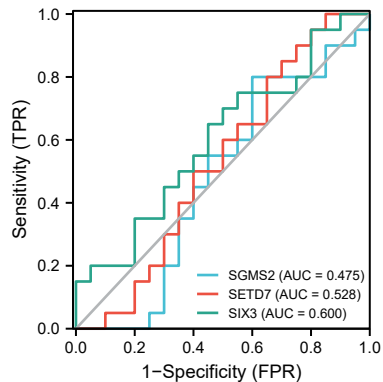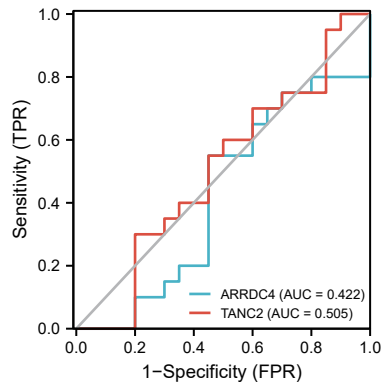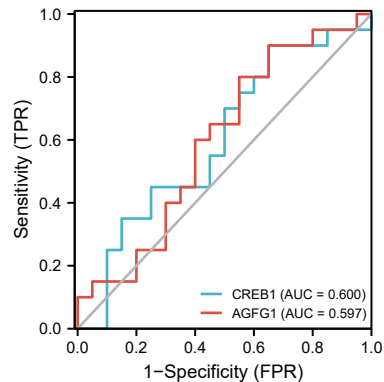

Supplement: Data_Sheet_1.ZIP [file Data_Sheet_1.ZIP]

A

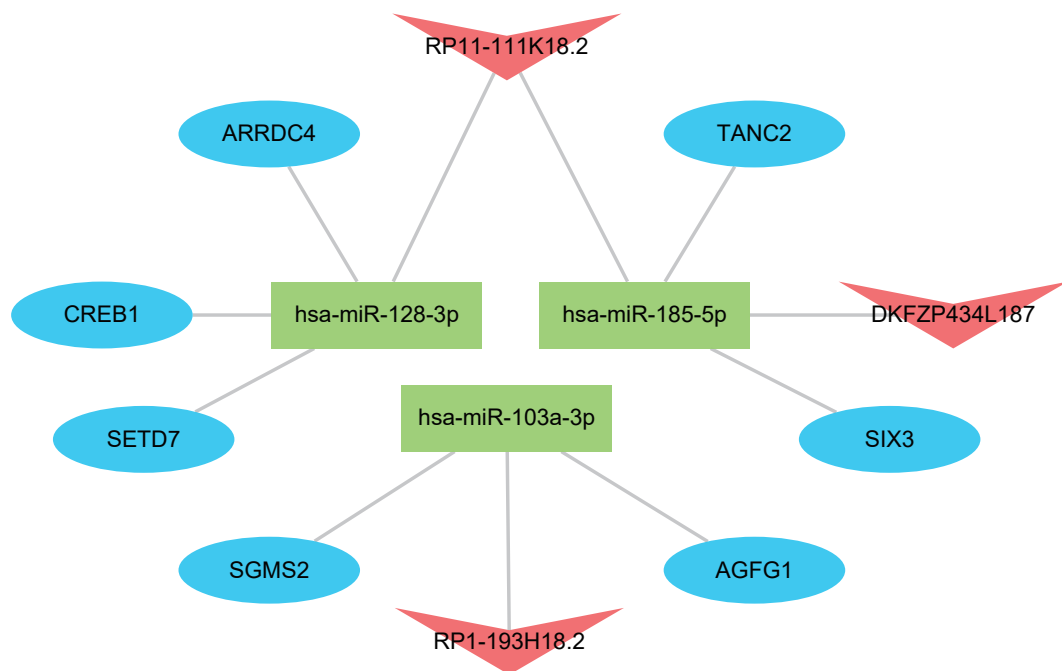

B

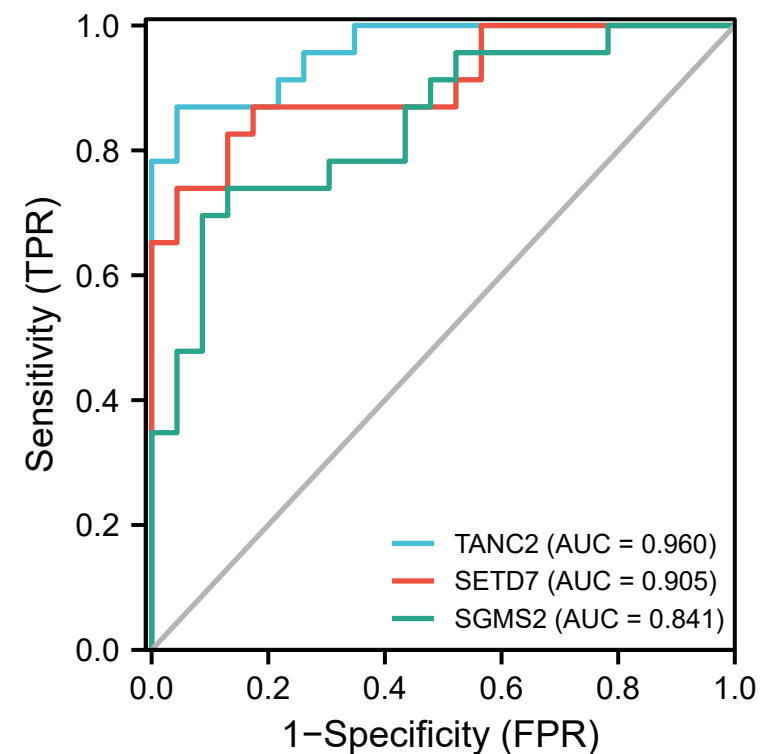

C

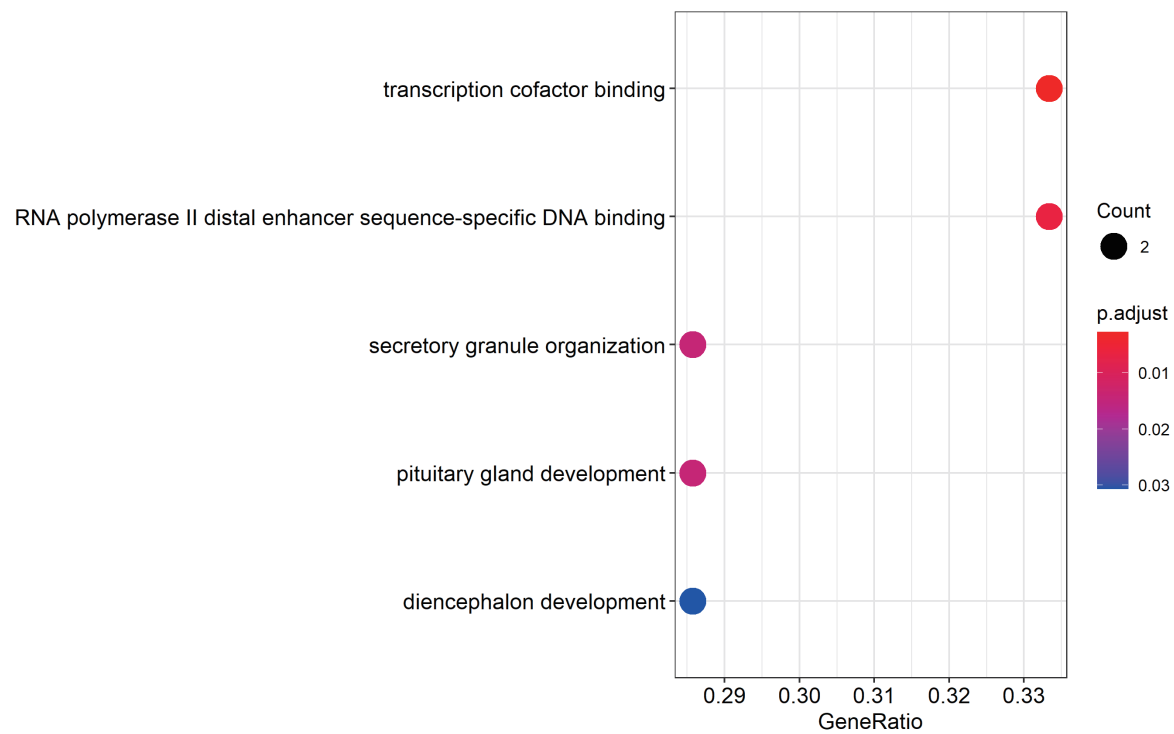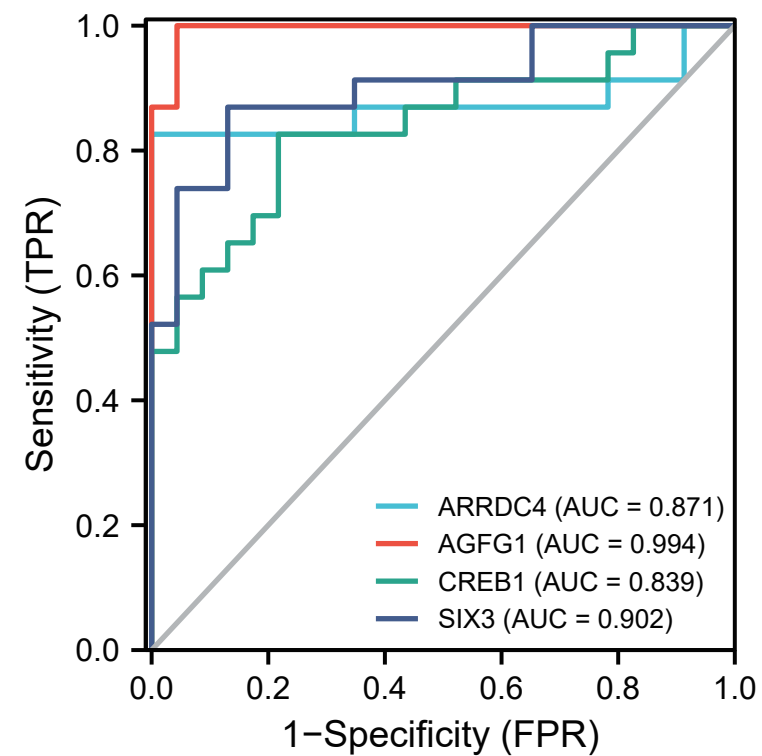

Supplement: Data_Sheet_1.ZIP [file Data_Sheet_1.ZIP]

## Module-trait relationships

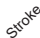[illegible]

Supplement: Data_Sheet_1.ZIP [file Data_Sheet_1.ZIP]

A

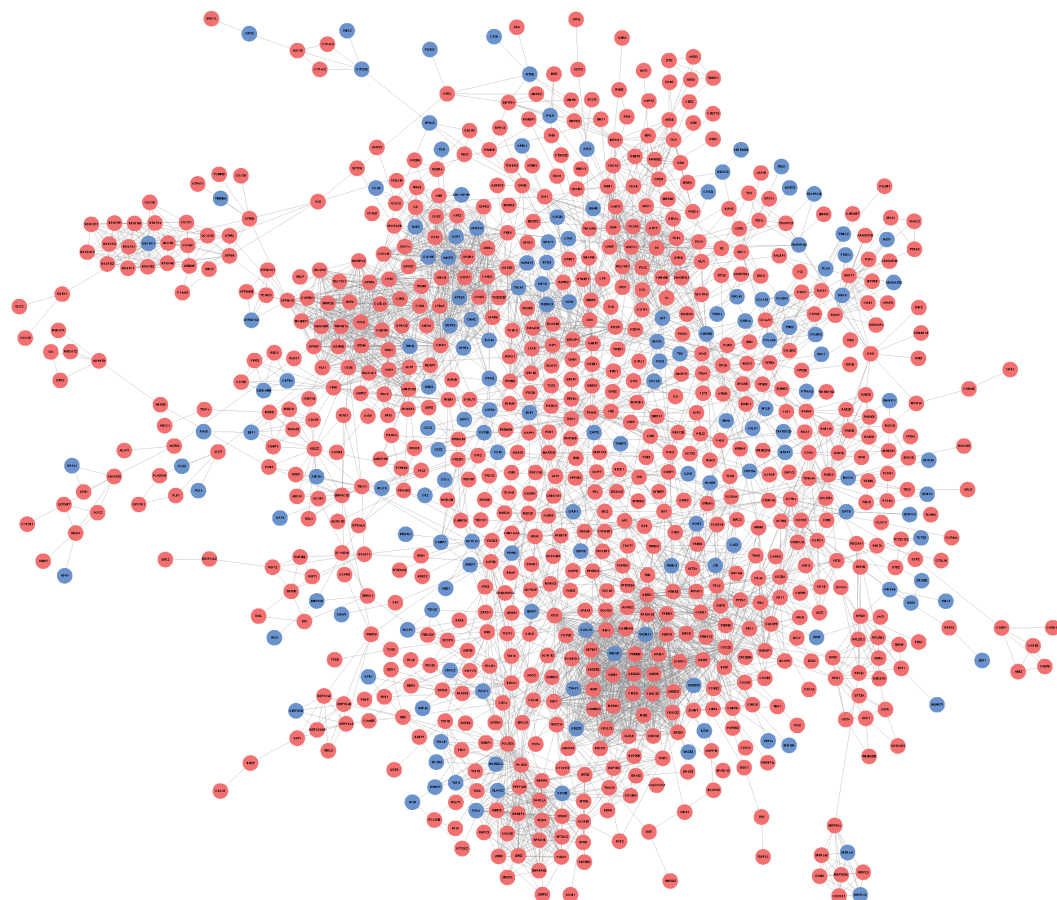

B

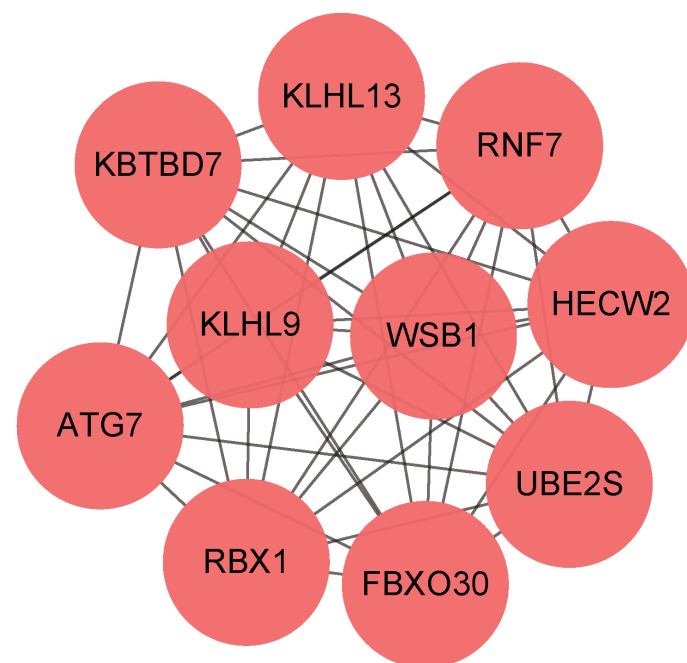

C

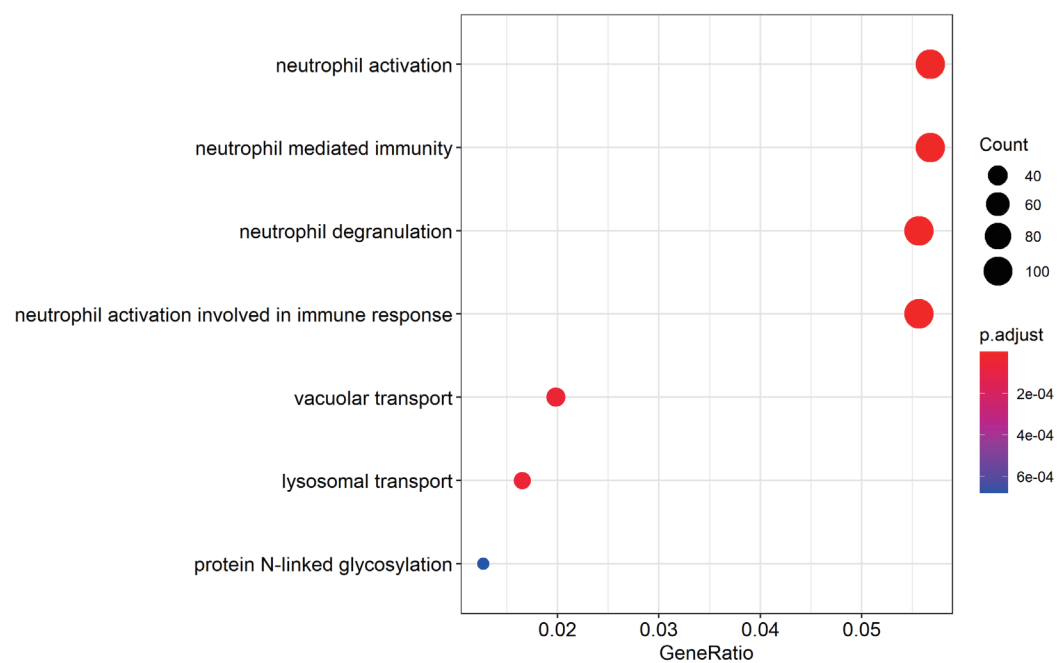

Supplement: Data_Sheet_1.ZIP [file Data_Sheet_1.ZIP]

A

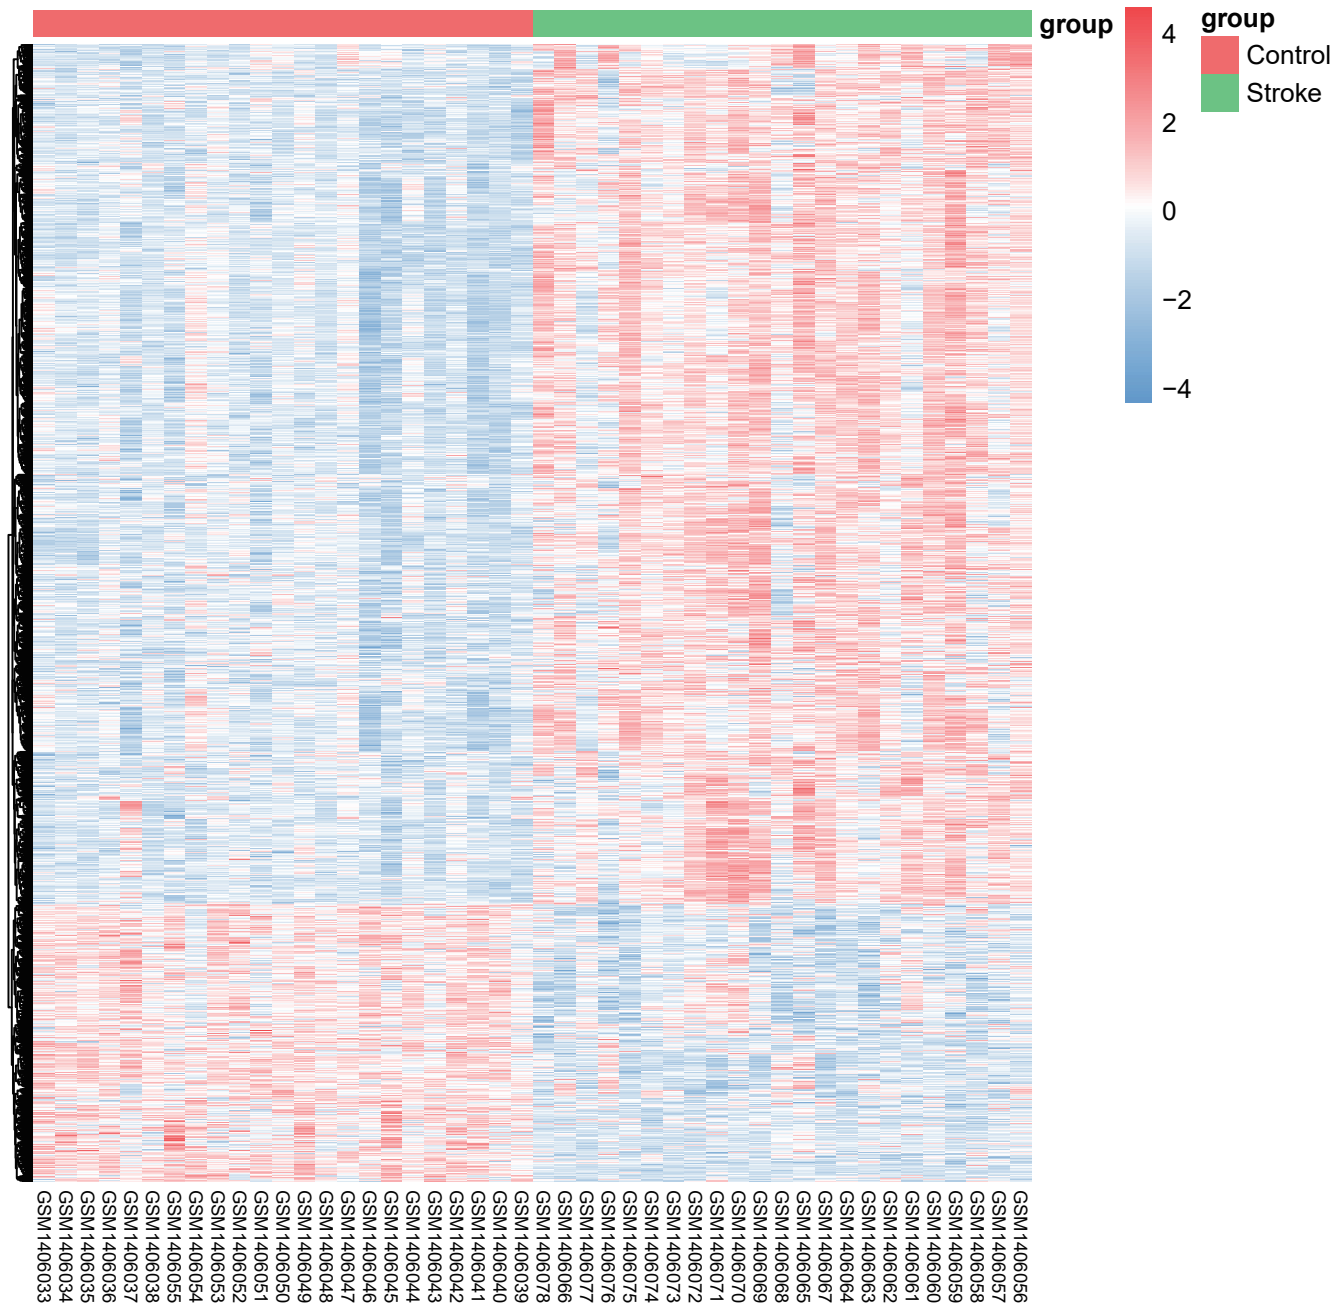

B

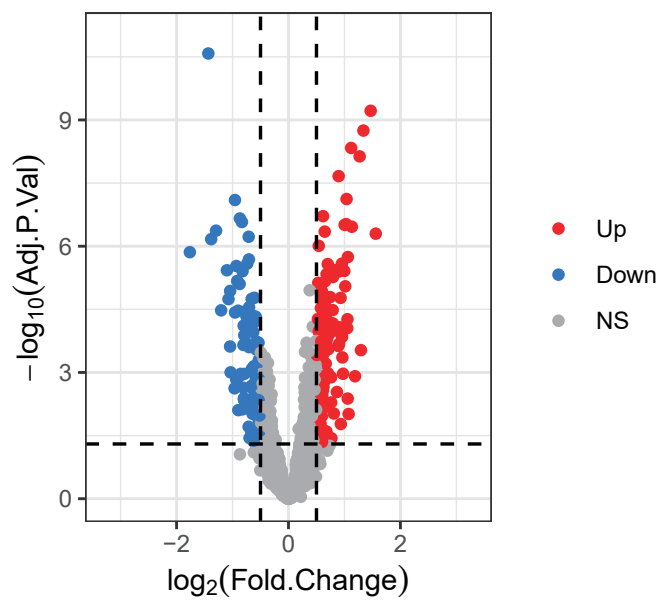

C

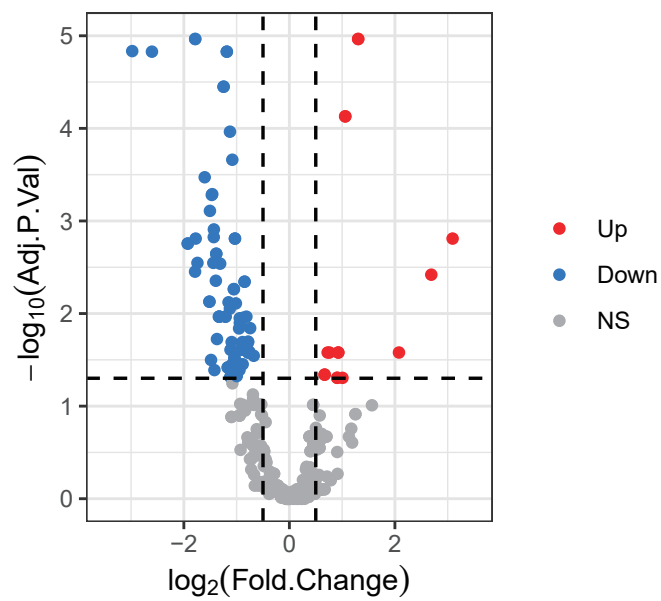

Supplement: Data_Sheet_1.ZIP [file Data_Sheet_1.ZIP]

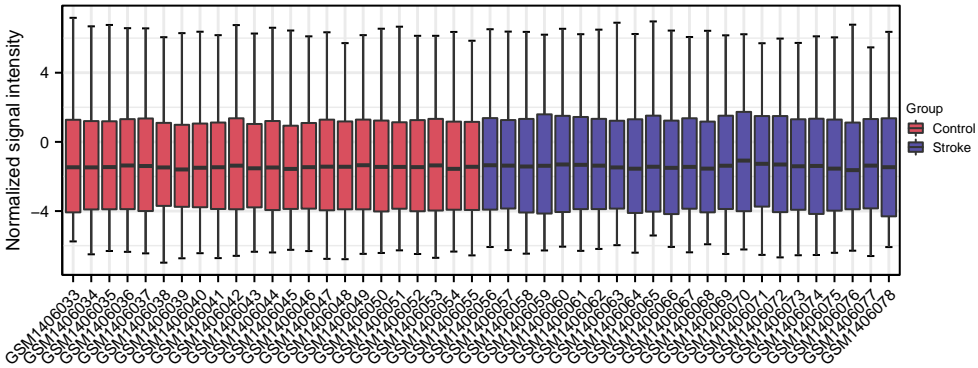

Supplement: Data_Sheet_6.ZIP [file Data_Sheet_6.ZIP]

# Gene dendrogram and module colors

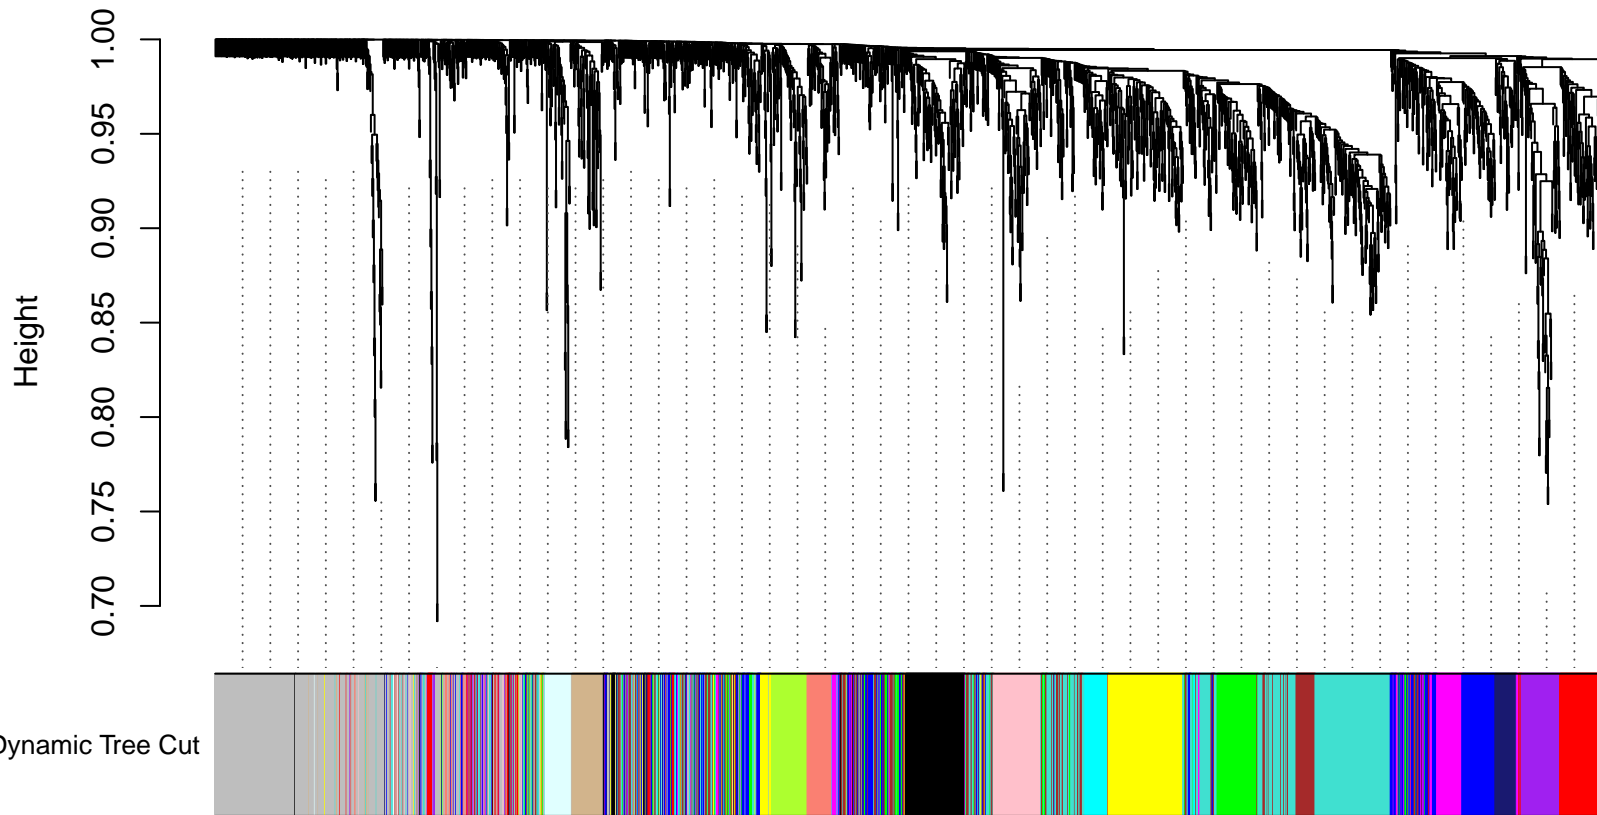

Supplement: Data_Sheet_6.ZIP [file Data_Sheet_6.ZIP]

Scale independence

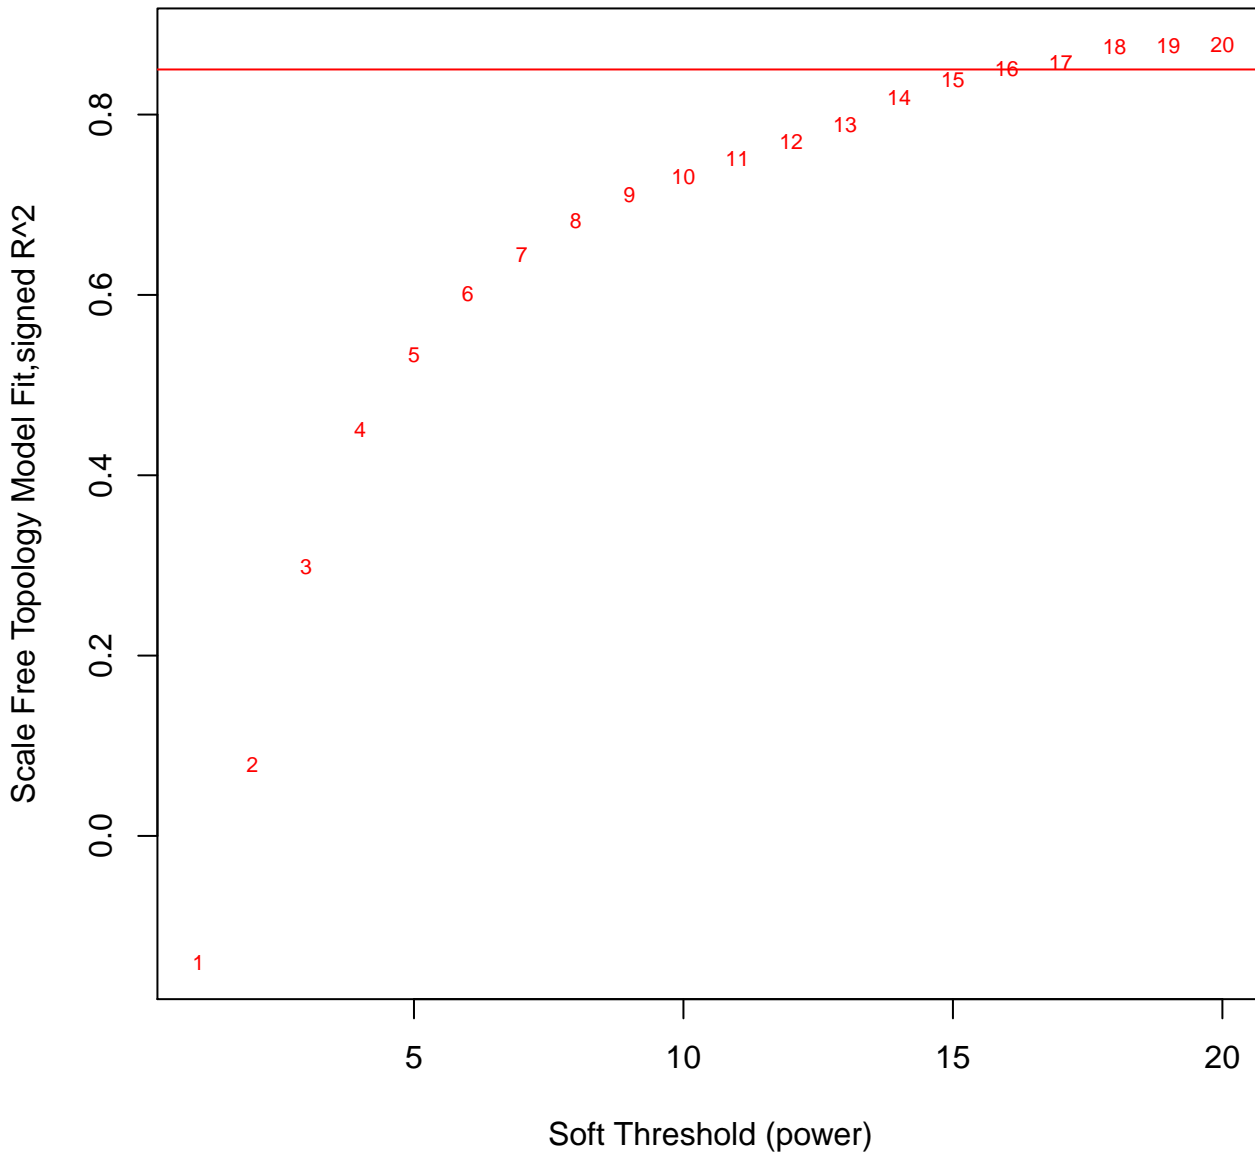

Mean connectivity

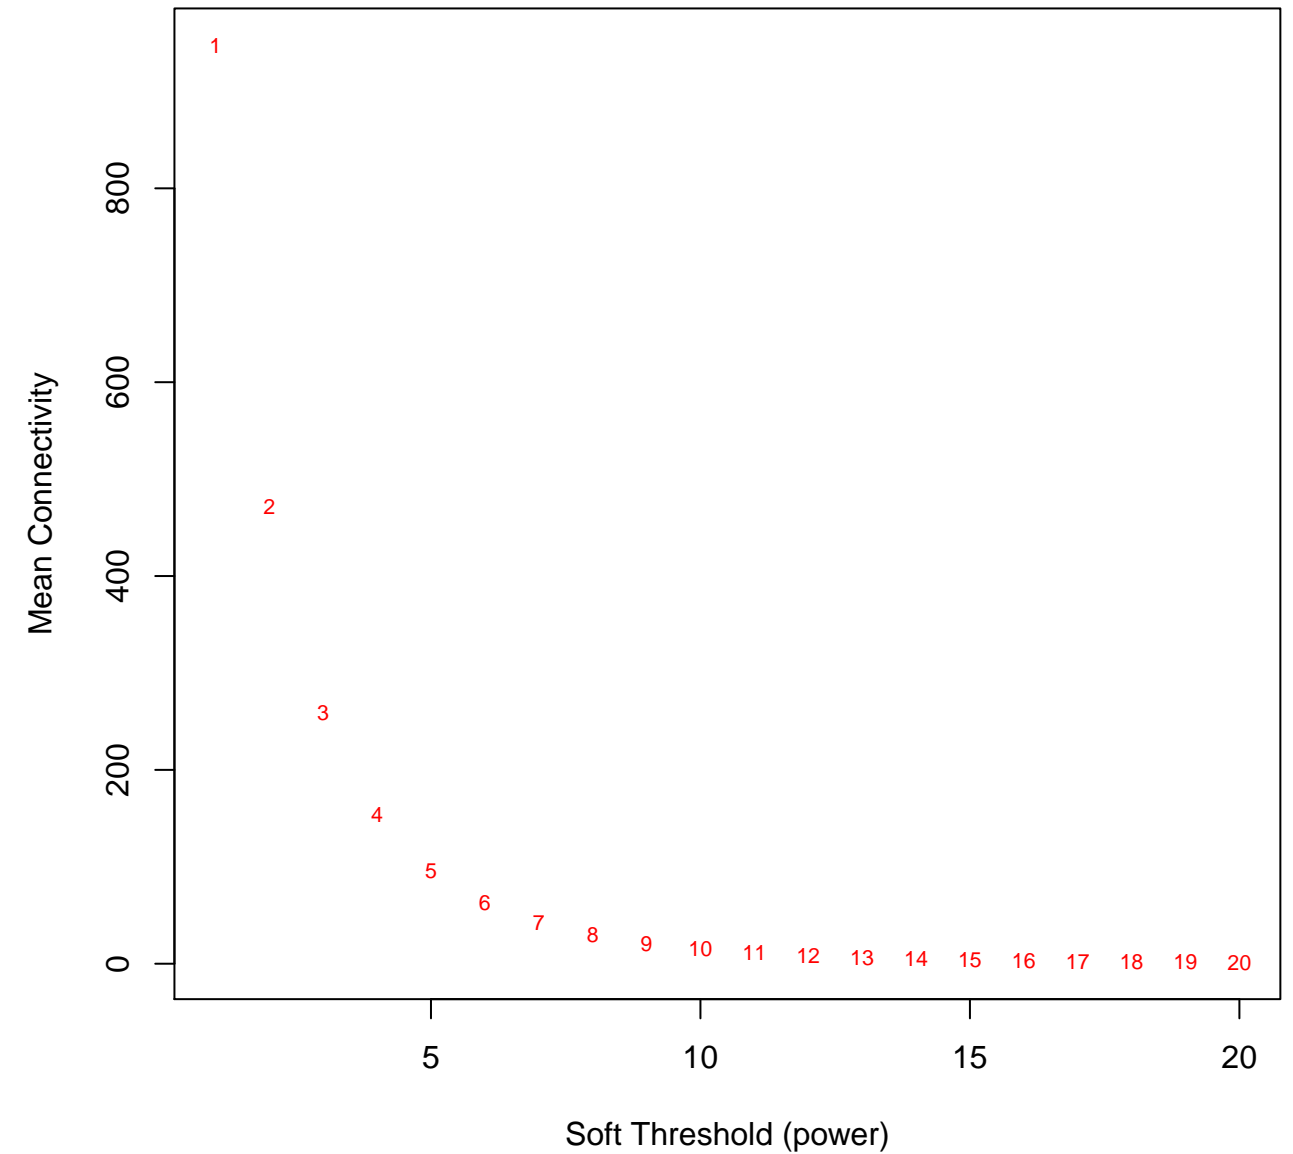

Supplement: Data_Sheet_6.ZIP [file Data_Sheet_6.ZIP]

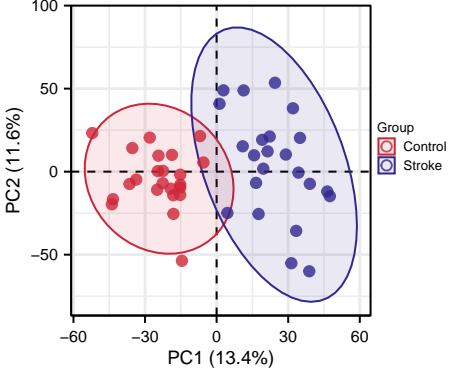

Supplement: Data_Sheet_6.ZIP [file Data_Sheet_6.ZIP]

# Cluster Dendrogram

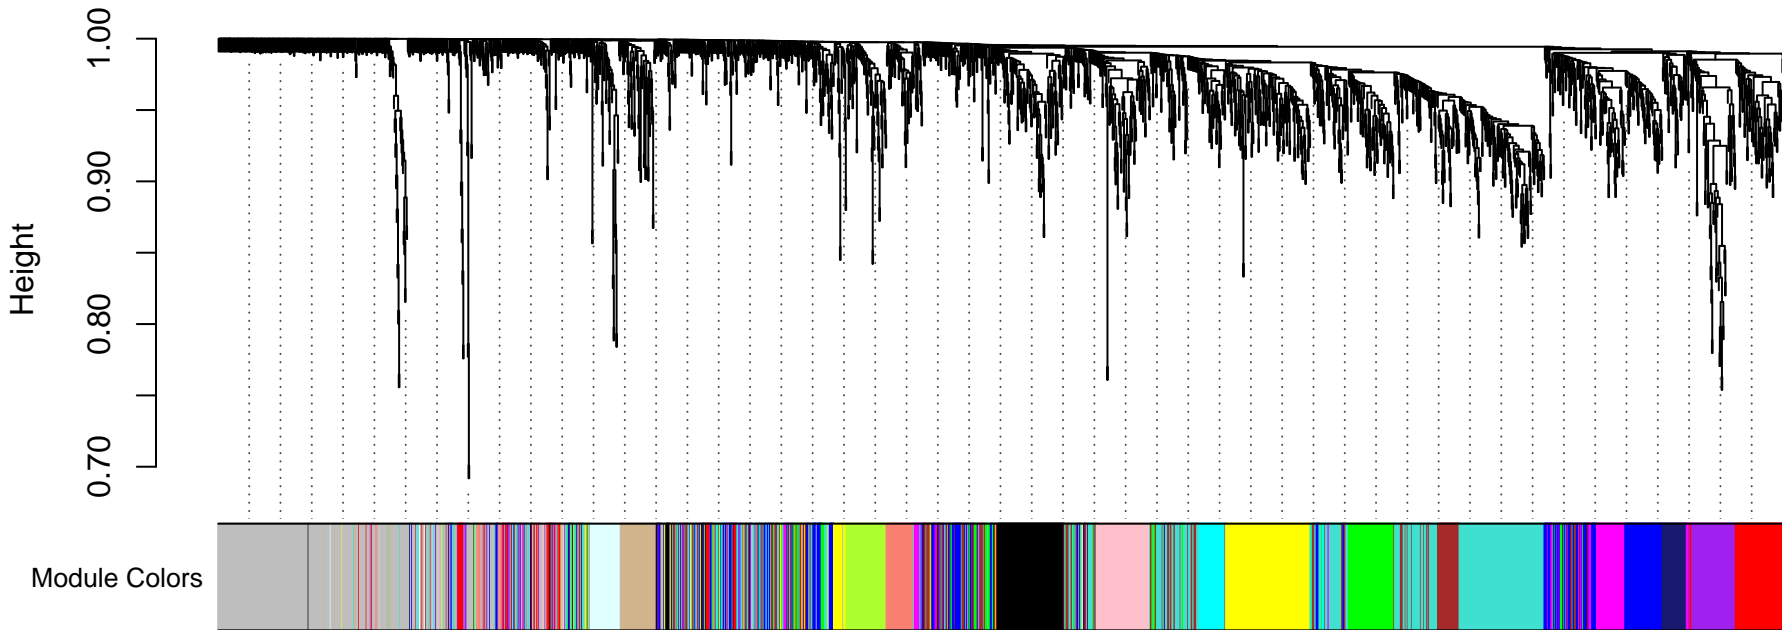

Supplement: Data_Sheet_6.ZIP [file Data_Sheet_6.ZIP]

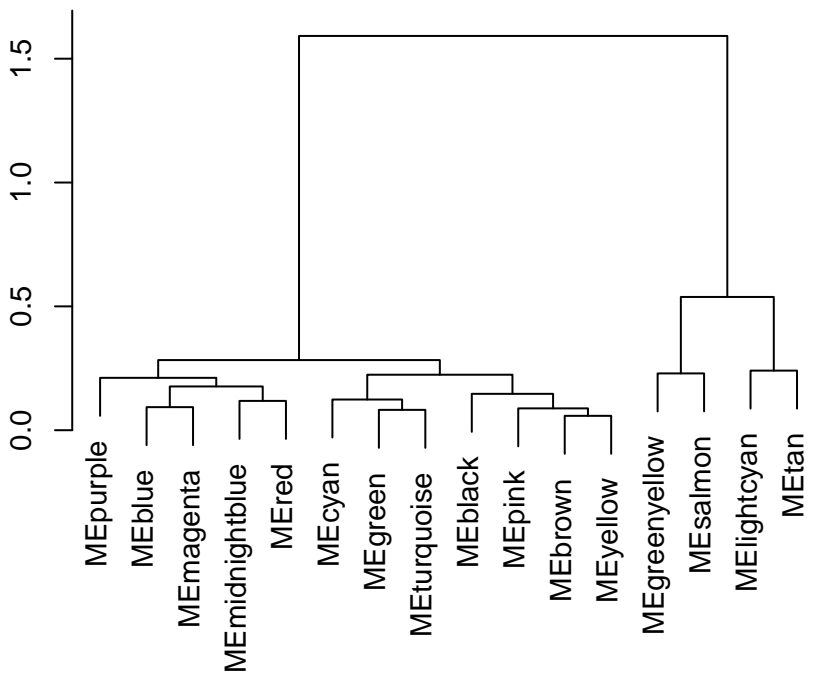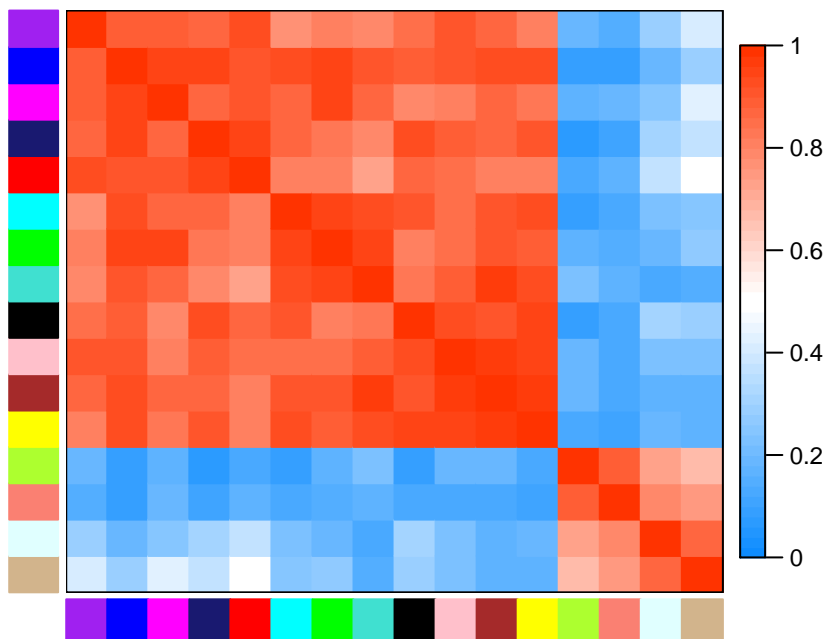

Supplement: Data_Sheet_6.ZIP [file Data_Sheet_6.ZIP]

# Gene Dendrogram and module colors

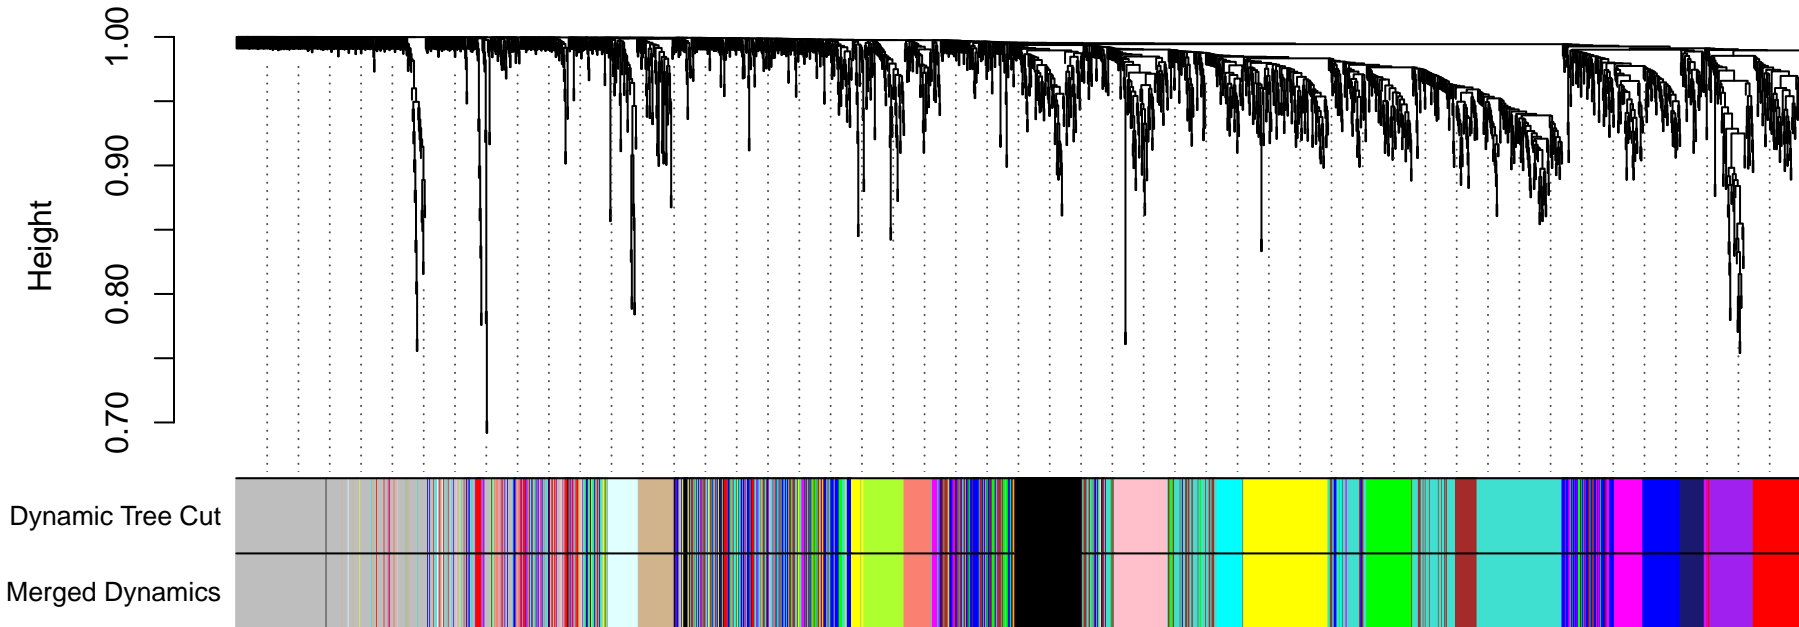

Supplement: Data_Sheet_6.ZIP [file Data_Sheet_6.ZIP]

# Module–trait relationships

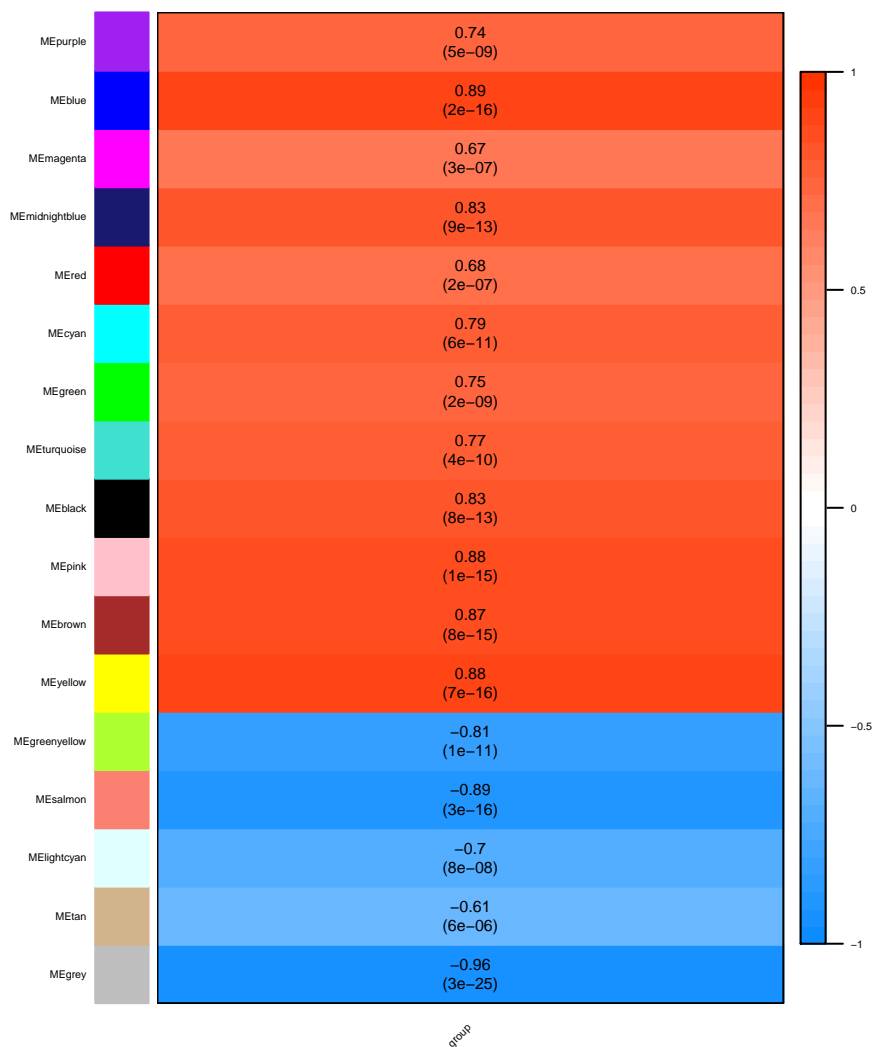

Supplement: Data_Sheet_6.ZIP [file Data_Sheet_6.ZIP]

Sample dendrogram and trait heatmap

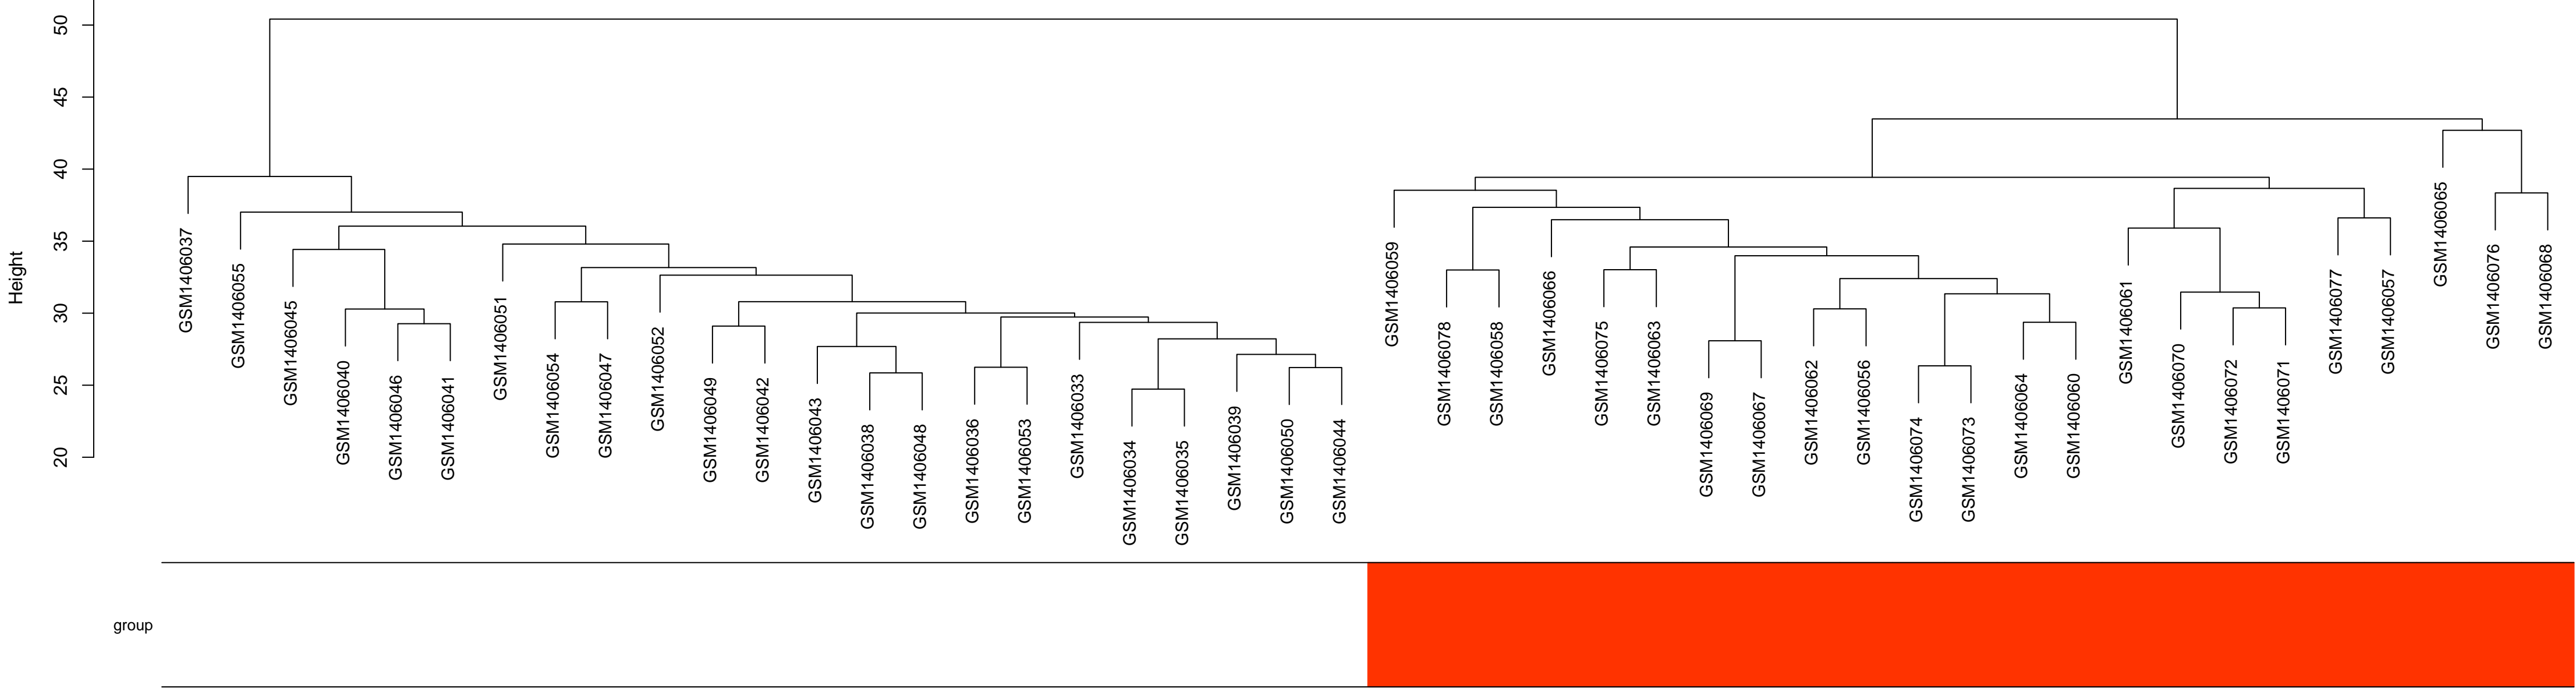

Supplement: Data_Sheet_6.ZIP [file Data_Sheet_6.ZIP]

**Module membership vs. gene significance**  
**cor=0.84, p=9.7e-59**

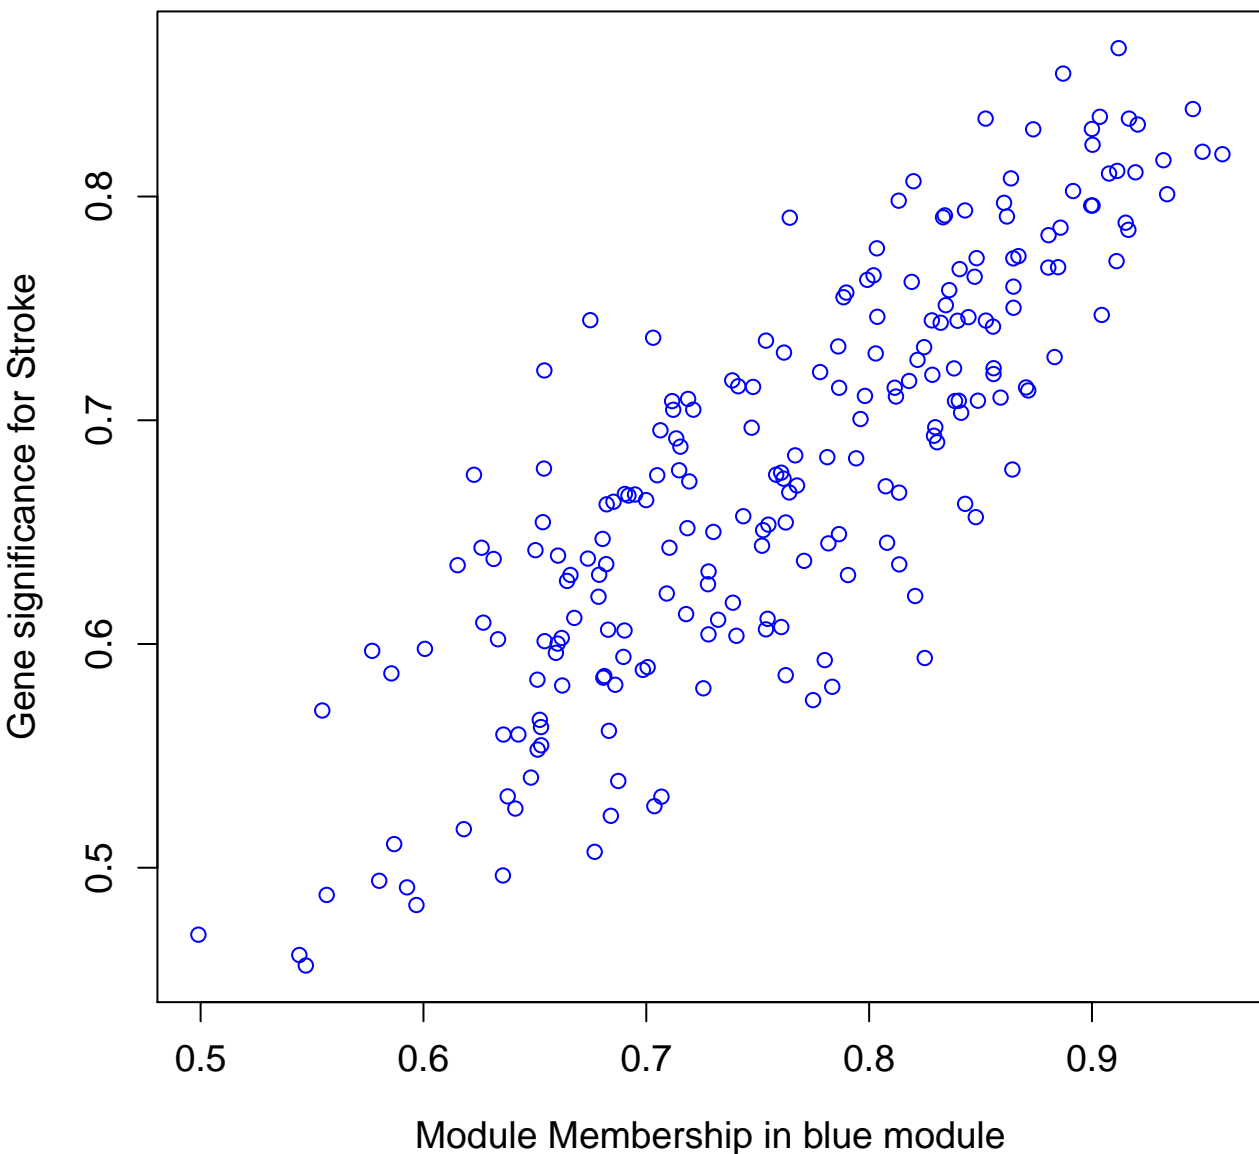

Supplement: Data_Sheet_6.ZIP [file Data_Sheet_6.ZIP]

Histogram of k

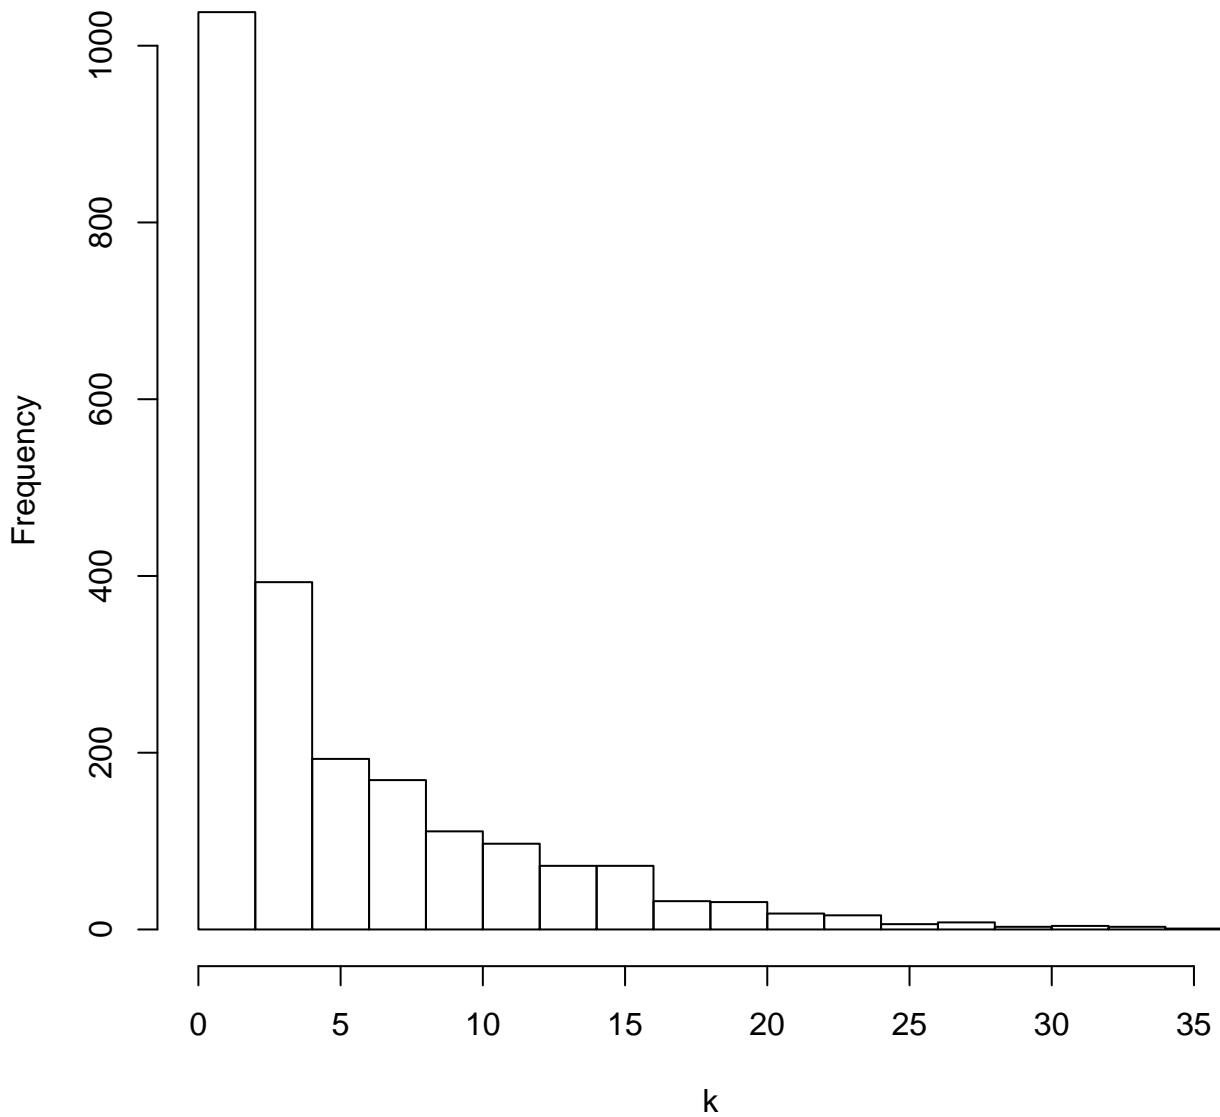

Check scale free topology scale  $R^2= 0.88$  , slope=  $-1.99$

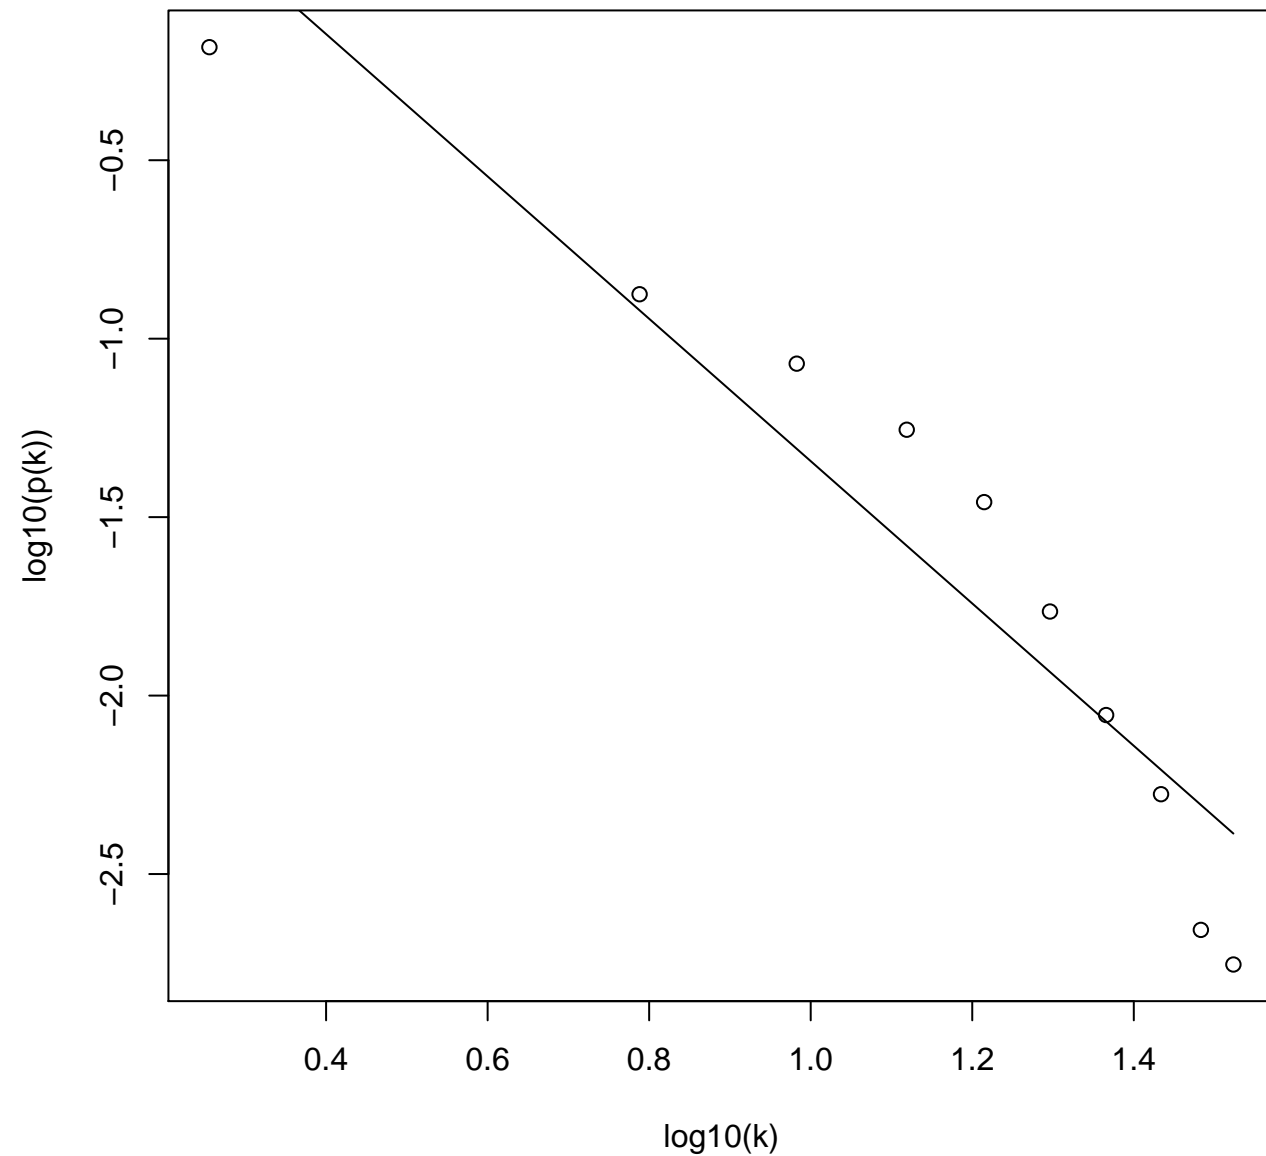

Supplement: Data_Sheet_6.ZIP [file Data_Sheet_6.ZIP]

**Clustering of ME before combined**

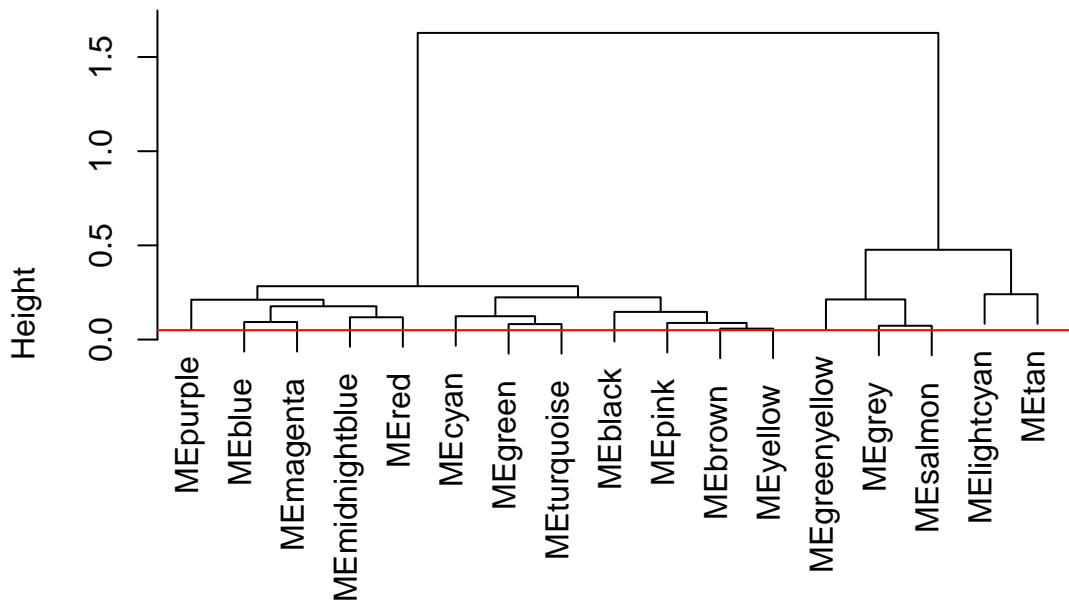

**Clustering of ME after combined**

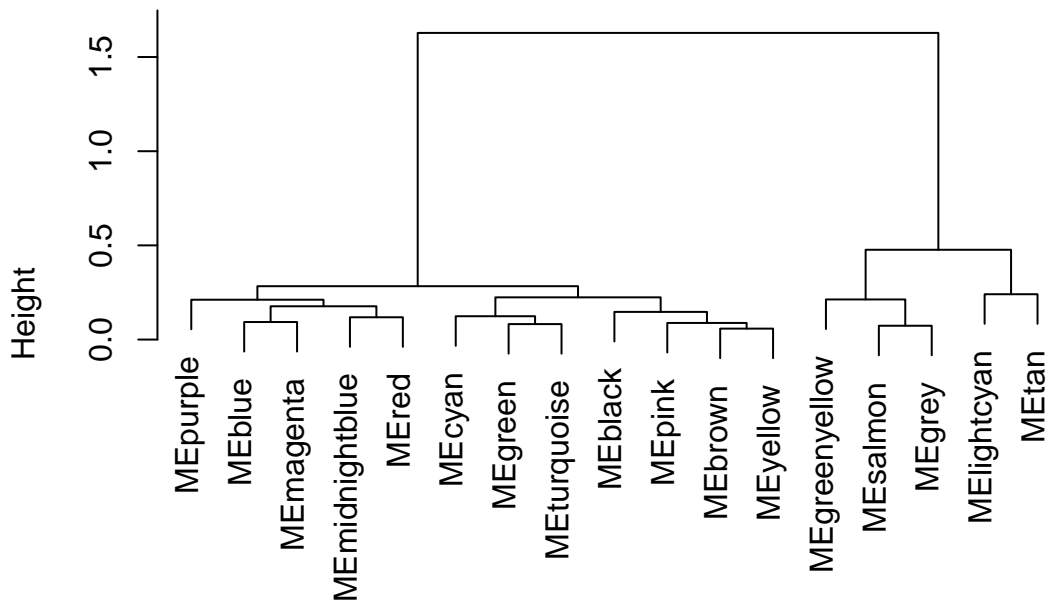

Supplement: Data_Sheet_6.ZIP [file Data_Sheet_6.ZIP]

# Gene clustering on TOM-based

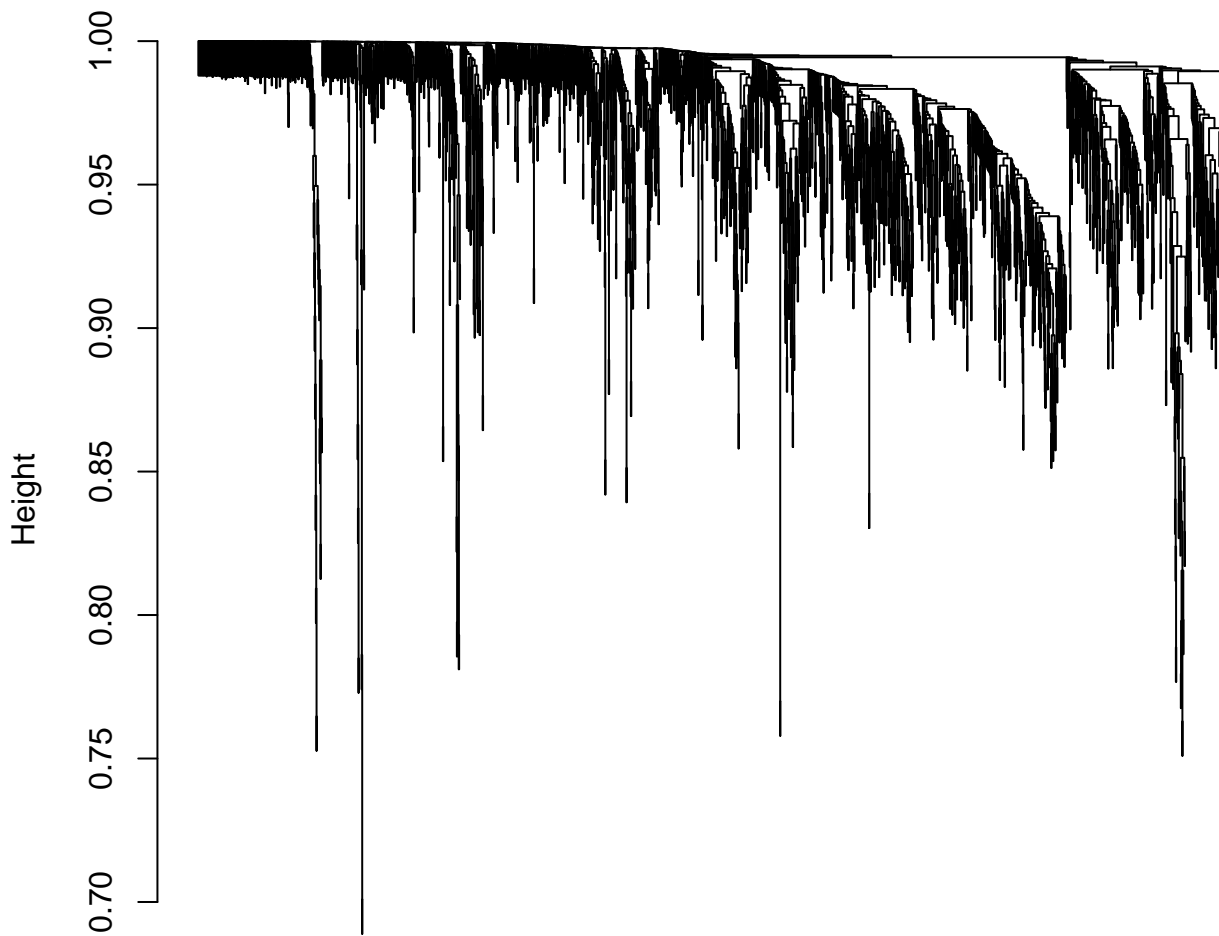

Supplement: Data_Sheet_6.ZIP [file Data_Sheet_6.ZIP]

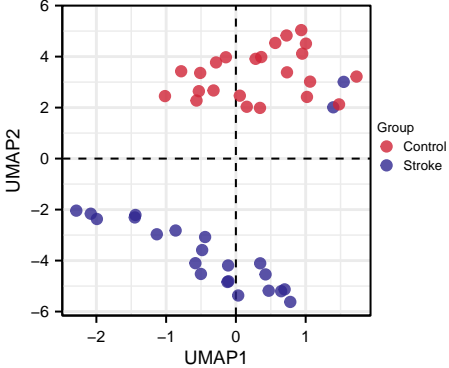

Supplement: Data_Sheet_6.ZIP [file Data_Sheet_6.ZIP]

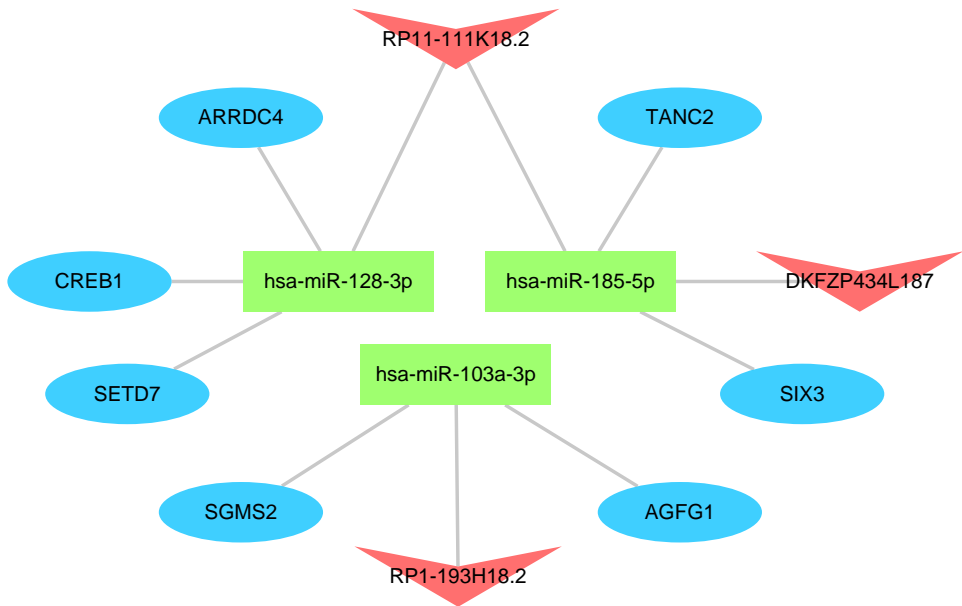

Supplement: Data_Sheet_8.ZIP [file Data_Sheet_8.ZIP]
